# Supplementary material for: Gene Expression Profiling of the Shoot Meristematic Tissues in Woodland Strawberry Fragaria vesca
Source: Front Plant Sci. 2019 Dec 13;10:1624. doi: 10.3389/fpls.2019.01624 (PMC6923813; doi:10.3389/fpls.2019.01624)
Supplement: Supplementary file 1 [file DataSheet_1.xlsx]

## Sheet: DE genes-1
Supplementary Data 1 DEGs and their enriched GO terms in the pairwise comparisons.
SHEET 1: Genes up-regulated or down-regulated in the FM compared to SAM
SHEET2: Genes up-regulated or down-regulated in the REM compared to FM
SHEET3: Enriched GO terms in the list of genes up-regulated in the FM compared to SAM
SHEET4: Enriched GO terms in the list of genes up-regulated in the REM compared to FM
Genes up-regulated or down-regulated in the FM compared to SAM
Genes with log2FoldChange >1.0 and a padj < 0.05 are shown.
Gene ID	log2FoldChange	p-value	padj	SAM_TPM	FM_TPM	Regulation	Symbol	Description
FvH4_5g13510	6.79313	1.65e-81	8.6e-78	2.3483	227.314	up	AGL2,SEP1	K-box region and MADS-box transcription factor family protein
FvH4_4g29600	3.74885	9.56e-79	3.99e-75	29.7713	341.719	up	AGL7,AP1	K-box region and MADS-box transcription factor family protein
FvH4_2g38970	4.99453	1.76e-76	6.12e-73	2.35282	65.766	up	AP3,ATAP3	K-box region and MADS-box transcription factor family protein
FvH4_4g23530	8.11587	1.82e-60	4.22e-57	0.160783	47.3153	up	AGL9,SEP3	K-box region and MADS-box transcription factor family protein
FvH4_6g40300	5.67877	1.46e-52	2.78e-49	0.39796	12.8609	up	AIR3	Subtilisin-like serine endopeptidase family protein
FvH4_3g01740	6.31441	2.82e-52	4.91e-49	3.2012	215.314	up	SLP3	subtilisin-like serine protease 3
FvH4_6g08720	5.49035	5.42e-51	8.09e-48	8.94832	347.184	up
FvH4_6g01040	3.82751	1.88e-48	2.62e-45	47.4752	543.244	up
FvH4_7g12670	8.54737	4.18e-44	5.14e-41	0.191609	43.0233	up	AGL6	AGAMOUS-like 6
FvH4_6g07670	4.12647	1.96e-41	2.27e-38	5.72837	80.8357	up	ATPUP4,PUP4	purine permease 4
FvH4_6g01050	5.43677	4.75e-41	5.23e-38	2.15799	90.7737	up
FvH4_5g17710	5.46634	7.96e-40	7.92e-37	3.11712	108.299	up
FvH4_6g06500	4.49128	1.16e-39	1.1e-36	1.85931	33.027	up		Heavy metal transport/detoxification superfamily protein
FvH4_3g03990	8.02176	2.4e-37	1.93e-34	0.0915139	20.5201	up	UFO	F-box family protein
FvH4_6g49000	2.99971	1.47e-34	1.03e-31	5.91097	40.6056	up	ATHB-3,ATHB3,HAT7,HB-3	homeobox 3
FvH4_5g09660	3.10828	9.19e-34	6e-31	47.4102	341.729	up	LFY,LFY3	floral meristem identity control protein LEAFY (LFY)
FvH4_3g12960	4.46056	1.59e-33	1.01e-30	9.51767	159.32	up	UFO	F-box family protein
FvH4_5g38040	3.75038	2.42e-33	1.49e-30	3.45408	39.3852	up		2-oxoglutarate (2OG) and Fe(II)-dependent oxygenase superfamily protein
FvH4_2g27860	8.17773	6.72e-33	4.01e-30	0.158391	39.3247	up	PI	K-box region and MADS-box transcription factor family protein
FvH4_4g28250	4.23541	8.85e-32	5.14e-29	11.2541	166.431	up		Leucine-rich repeat (LRR) family protein
FvH4_4g02430	2.96835	1.28e-31	7.24e-29	24.6227	159.139	up
FvH4_6g46420	3.30311	6.81e-31	3.65e-28	2.77034	23.8732	up	AGL4,SEP2	K-box region and MADS-box transcription factor family protein
FvH4_3g06360	4.04036	1.54e-30	7.69e-28	2.53412	36.4767	up	ATHB40,HB-5,HB40	homeobox protein 40
FvH4_3g03530	4.5762	3.55e-30	1.69e-27	0.830994	17.4307	up	LFY,LFY3	floral meristem identity control protein LEAFY (LFY)
FvH4_7g11260	2.77981	9.44e-30	4.38e-27	41.0512	237.766	up	AFO,FIL,YAB1	Plant-specific transcription factor YABBY family protein
FvH4_3g04300	4.02845	1.38e-29	6.29e-27	3.06908	44.737	up		Putative lysine decarboxylase family protein
FvH4_3g11720	3.63257	3.02e-29	1.32e-26	13.3505	129.774	up	ATGID1B,GID1B	alpha/beta-Hydrolases superfamily protein
FvH4_6g07120	2.84692	4.47e-29	1.91e-26	9.94516	60.2822	up	GATA15	GATA transcription factor 15
FvH4_6g04840	3.44971	2.5e-28	1.01e-25	1.41126	12.8034	up	BON3	Calcium-dependent phospholipid-binding Copine family protein
FvH4_3g04560	3.50395	1.73e-27	6.56e-25	13.3492	120.542	up
FvH4_6g06880	10.1545	1.47e-26	5.38e-24	0.0955972	107.532	up	UFO	F-box family protein
FvH4_5g13500	2.84836	8.11e-26	2.78e-23	10.7917	65.9836	up	AGL8,FUL	AGAMOUS-like 8
FvH4_6g07500	3.14289	3.7e-25	1.25e-22	6.11786	45.474	up		F-box/RNI-like/FBD-like domains-containing protein
FvH4_6g06410	3.73691	5.37e-25	1.78e-22	2.7688	30.7254	up		Trypsin family protein with PDZ domain
FvH4_6g01390	3.35288	6.95e-24	2.24e-21	8.40773	71.1971	up		GDSL-like Lipase/Acylhydrolase superfamily protein
FvH4_2g36880	2.47657	8.33e-24	2.64e-21	5.48449	25.215	up	AHA5,HA5	H(+)-ATPase 5
FvH4_1g12260	6.56265	1.4e-23	4.38e-21	0.14741	12.5446	up	AP3,ATAP3	K-box region and MADS-box transcription factor family protein
FvH4_3g34320	3.08454	1.44e-22	4.31e-20	3.92473	27.2825	up
FvH4_2g36250	2.72525	4.17e-22	1.16e-19	32.4076	150.107	up	ATRD22,RD22	BURP domain-containing protein
FvH4_3g04400	5.21137	4.3e-22	1.18e-19	0.283377	9.14845	up	PGA6,WUS,WUS1	Homeodomain-like superfamily protein
FvH4_6g06070	2.38623	8.04e-22	2.15e-19	18.301	81.6506	up	ANAC098,ATCUC2,CUC2	NAC (No Apical Meristem) domain transcriptional regulator superfamily protein
FvH4_6g13490	4.0416	1.65e-21	4.36e-19	1.87168	26.0206	up		Haloacid dehalogenase-like hydrolase (HAD) superfamily protein
FvH4_6g20040	2.74363	7.41e-21	1.91e-18	12.4053	64.7416	up		Putative lysine decarboxylase family protein
FvH4_6g46410	2.161	8.19e-21	2.09e-18	22.6002	90.4023	up	AGL8,FUL	AGAMOUS-like 8
FvH4_1g07390	8.39527	8.87e-21	2.23e-18	0.0480607	11.5513	up	CGA1,GATA22	cytokinin-responsive gata factor 1
FvH4_6g14200	2.32229	8.29e-20	1.97e-17	53.8755	224.033	up
FvH4_5g04833	4.96097	1.05e-19	2.46e-17	0.358261	10.1355	up		RING/U-box superfamily protein
FvH4_3g04000	3.54324	1.54e-19	3.58e-17	1.3108	12.0233	up		SGNH hydrolase-type esterase superfamily protein
FvH4_3g19650	2.17884	4.32e-19	9.6e-17	16.6268	63.6065	up	SPL4	squamosa promoter binding protein-like 4
FvH4_2g27870	10.898	6.18e-19	1.34e-16	0	22.5764	up	PI	K-box region and MADS-box transcription factor family protein
FvH4_5g32890	3.53528	8.47e-19	1.82e-16	0.876424	8.23124	up		GDSL-like Lipase/Acylhydrolase superfamily protein
FvH4_2g38950	2.02833	2.03e-18	4.16e-16	12.9272	44.5338	up	SRS7	SHI-related sequence 7
FvH4_5g22360	2.72458	2.94e-18	5.96e-16	4.16471	23.2136	up	bHLH071	beta HLH protein 71
FvH4_5g05880	2.37486	3.51e-18	7.06e-16	9.08796	39.3464	up	TAR2	tryptophan aminotransferase related 2
FvH4_5g10410	3.14547	4.81e-18	9.4e-16	1.17698	9.22885	up	NGA1	AP2/B3-like transcriptional factor family protein
FvH4_6g11940	3.62774	5.93e-18	1.15e-15	9.37445	90.2242	up		HXXXD-type acyl-transferase family protein
FvH4_2g27400	6.58297	1.07e-17	2.03e-15	0.0764858	6.65726	up		Transcriptional factor B3 family protein
FvH4_3g11290	2.85909	1.47e-17	2.74e-15	9.85288	61.931	up	AGL6	AGAMOUS-like 6
FvH4_6g17810	2.00851	2.59e-17	4.78e-15	9.30193	31.7711	up	G-TMT,TMT1,VTE4	gamma-tocopherol methyltransferase
FvH4_1g25740	2.44196	2.92e-17	5.35e-15	2.27779	10.8141	up		Leucine-rich repeat protein kinase family protein
FvH4_3g29930	2.72885	3.37e-17	6.12e-15	15.7441	87.7705	up
FvH4_6g10390	1.70547	6.32e-17	1.12e-14	64.0693	175.077	up		ENTH/VHS/GAT family protein
FvH4_6g10380	2.7708	6.77e-17	1.19e-14	2.65131	18.3596	up		Protein of unknown function (DUF567)
FvH4_5g38050	2.42224	7.36e-17	1.27e-14	6.00502	28.923	up		2-oxoglutarate (2OG) and Fe(II)-dependent oxygenase superfamily protein
FvH4_3g45501	2.64964	1e-16	1.71e-14	9.55549	50.3559	up		Mitochondrial substrate carrier family protein
FvH4_5g09190	2.89173	1.38e-16	2.31e-14	4.68179	29.572	up	ACP4	acyl carrier protein 4
FvH4_2g33321	3.31295	2.98e-16	4.79e-14	2.07004	15.5463	up	ARA12	Subtilase family protein
FvH4_2g40960	2.40646	3.21e-16	5.04e-14	25.4975	114.867	up		Transcriptional factor B3 family protein
FvH4_3g04610	2.59957	3.19e-16	5.04e-14	2.25068	11.7939	up	ATCKX5,CKX7	cytokinin oxidase 7
FvH4_3g12221	6.83323	3.17e-16	5.04e-14	0.0820874	9.49816	up	FLO10,FON1,SUP	C2H2 and C2HC zinc fingers superfamily protein
FvH4_5g29070	2.08851	9.93e-16	1.54e-13	6.93236	25.1446	up		Plant L-ascorbate oxidase
FvH4_5g23520	2.41952	1.12e-15	1.7e-13	3.90168	17.3787	up	PRK	phosphoribulokinase
FvH4_2g08400	2.37446	2.21e-15	3.3e-13	5.86618	24.372	up	ATPLT5,ATPMT5,PMT5	polyol/monosaccharide transporter 5
FvH4_5g20460	2.51479	2.32e-15	3.45e-13	4.62897	21.3182	up	DHS2	3-deoxy-d-arabino-heptulosonate 7-phosphate synthase
FvH4_7g17810	2.18592	2.68e-15	3.94e-13	6.54786	25.3119	up	ATOMT1,OMT1	O-methyltransferase 1
FvH4_7g06890	1.8649	2.76e-15	4.04e-13	12.2987	38.7177	up	PHF1	phosphate transporter traffic facilitator1
FvH4_7g21300	4.20381	4.31e-15	6.17e-13	2.54857	34.7459	up		Protein of unknown function (DUF674)
FvH4_6g06530	1.5737	4.36e-15	6.19e-13	53.0074	137.089	up		Rubber elongation factor protein (REF)
FvH4_4g25630	2.72952	4.78e-15	6.75e-13	2.66045	14.0687	up	DRN-LIKE,DRNL,ESR2,SOB2	DORNROSCHEN-like
FvH4_4g04470	3.72473	8.7e-15	1.2e-12	0.36255	4.40856	up	SDG31,SUVR4	SET-domain containing protein lysine methyltransferase family protein
FvH4_6g42040	2.81777	1.04e-14	1.43e-12	1.30381	8.58429	up	AGO9	Argonaute family protein
FvH4_2g21070	2.40579	1.15e-14	1.57e-12	5.28407	22.5695	up	RIC7	ROP-interactive CRIB motif-containing protein 7
FvH4_6g48120	5.16172	1.58e-14	2.12e-12	0.415428	12.1934	up	ANAC100,ATNAC5,NAC100	NAC domain containing protein 100
FvH4_1g12280	2.23562	1.63e-14	2.17e-12	2.92948	12.2568	up	ALDH3F1	aldehyde dehydrogenase 3F1
FvH4_6g06510	2.16081	1.99e-14	2.58e-12	35.2567	131.523	up	ATRAD9,RAD9	cell cycle checkpoint control protein family
FvH4_6g08330	2.02699	3.12e-14	4.03e-12	422.192	1393.71	up
FvH4_7g32261	2.77273	7.39e-14	9.03e-12	4.65484	28.2271	up
FvH4_6g04960	2.26501	9.72e-14	1.17e-11	156.537	606.897	up	ATGID1C,GID1C	alpha/beta-Hydrolases superfamily protein
FvH4_7g27250	2.727	1.17e-13	1.4e-11	9.44316	48.5553	up		Uncharacterised conserved protein (UCP012943)
FvH4_1g01070	1.81634	1.53e-13	1.8e-11	62.9739	185.161	up	ATCIPK6,CIPK6,SIP3,SNRK3.14	SOS3-interacting protein 3
FvH4_5g02110	2.31062	1.97e-13	2.29e-11	13.0467	51.9548	up		C2 calcium/lipid-binding plant phosphoribosyltransferase family protein
FvH4_4g33011	3.35022	2e-13	2.29e-11	1.09933	9.08297	up	ATPAP3,PAP3	purple acid phosphatase 3
FvH4_3g08880	2.43941	2.25e-13	2.57e-11	7.16967	34.5216	up	SPL3	squamosa promoter binding protein-like 3
FvH4_7g30290	1.52215	2.27e-13	2.58e-11	28.509	68.0865	up
FvH4_4g33370	9.40303	2.8e-13	3.11e-11	0	9.23745	up	KNATM	KNOX Arabidopsis thaliana meinox
FvH4_6g12570	2.49649	3.27e-13	3.61e-11	14.4183	67.549	up
FvH4_2g31940	2.49982	4.17e-13	4.56e-11	5.37532	25.1322	up	AtGLDP1,GLDP1	glycine decarboxylase P-protein 1
FvH4_1g30240	4.54761	4.48e-13	4.88e-11	0.503122	9.25487	up	atnudt17,NUDT17	nudix hydrolase homolog 17
FvH4_3g20500	2.32922	4.82e-13	5.22e-11	1.97937	8.38432	up		Polynucleotidyl transferase, ribonuclease H-like superfamily protein
FvH4_3g10130	3.38245	1.19e-12	1.25e-10	2.22226	19.0055	up	STPL,WOX8	WUSCHEL related homeobox 8
FvH4_7g28640	2.26413	1.31e-12	1.36e-10	2.74747	10.8003	up		Protein kinase superfamily protein
FvH4_5g21490	3.50146	1.47e-12	1.51e-10	1.33069	11.023	up	NRT1.5	nitrate transporter 1.5
FvH4_3g33060	2.14658	1.66e-12	1.68e-10	11.0338	42.0201	up		GTP binding Elongation factor Tu family protein
FvH4_7g17440	1.80624	1.71e-12	1.72e-10	15.195	37.4267	up	KCS1	3-ketoacyl-CoA synthase 1
FvH4_6g41874	2.7232	1.74e-12	1.74e-10	3.61952	19.4621	up		GDSL-like Lipase/Acylhydrolase superfamily protein
FvH4_6g08940	2.24008	2.02e-12	2e-10	47.9467	180.641	up		Tetratricopeptide repeat (TPR)-like superfamily protein
FvH4_4g24160	1.78997	2.4e-12	2.37e-10	6.5879	19.31	up	URE	urease
FvH4_5g19980	2.18879	2.64e-12	2.57e-10	2.42343	9.32814	up	PLA-I{beta]2	alpha/beta-Hydrolases superfamily protein
FvH4_6g27650	1.94603	3.05e-12	2.95e-10	3.81978	12.5227	up	ASP1	aspartate aminotransferase 1
FvH4_3g16830	2.19493	3.34e-12	3.22e-10	4.5543	18.2114	up		SOUL heme-binding family protein
FvH4_3g04710	5.85833	3.47e-12	3.32e-10	0.187575	11.1091	up
FvH4_2g01722	3.01325	3.76e-12	3.59e-10	1.1904	8.28728	up		Amidase family protein
FvH4_3g36920	2.51317	5.15e-12	4.8e-10	1.31576	6.79233	up	RCA	rubisco activase
FvH4_1g01720	1.80622	5.37e-12	4.96e-10	25.0045	75.2517	up	KNAT3	KNOTTED1-like homeobox gene 3
FvH4_3g35230	1.99386	5.67e-12	5.22e-10	40.3308	130.886	up
FvH4_4g32250	6.45031	7.81e-12	7.07e-10	0.153817	10.5686	up		Heavy metal transport/detoxification superfamily protein
FvH4_3g43040	1.77379	1.01e-11	9.07e-10	20.6324	57.5579	up	NTT,WIP2	C2H2-type zinc finger family protein
FvH4_6g47520	2.39262	1.03e-11	9.16e-10	2.86219	12.354	up	ATCNGC2,CNGC2,DND1	Cyclic nucleotide-regulated ion channel family protein
FvH4_6g42800	1.72366	1.04e-11	9.17e-10	10.1076	27.5412	up	ATCSLB04,ATCSLB4,CSLB04	cellulose synthase-like B4
FvH4_2g41370	3.56175	1.21e-11	1.07e-09	0.407265	3.68803	up		Eukaryotic aspartyl protease family protein
FvH4_7g22910	2.30746	1.24e-11	1.09e-09	12.1832	48.2622	up	RCA	rubisco activase
FvH4_6g21760	2.83228	1.71e-11	1.47e-09	1.74035	10.4632	up	ZFP8	zinc finger protein 8
FvH4_3g06200	3.19359	1.73e-11	1.48e-09	1.36569	9.58657	up	ATWRKY28,WRKY28	WRKY DNA-binding protein 28
FvH4_2g23300	3.95734	1.79e-11	1.51e-09	1.8021	20.3517	up		Seed maturation protein
FvH4_3g09410	1.92373	1.79e-11	1.51e-09	7.65175	23.7825	up	ALN,ATALN	allantoinase
FvH4_3g42660	2.57199	2.28e-11	1.89e-09	1.35457	6.66302	up	ATOPT1,OPT1	oligopeptide transporter 1
FvH4_4g19060	3.31451	2.29e-11	1.89e-09	1.84307	16.0141	up	MLP423	MLP-like protein 423
FvH4_1g13200	4.3018	2.9e-11	2.37e-09	0.327924	5.2888	up		alpha/beta-Hydrolases superfamily protein
FvH4_1g21640	2.01676	3.02e-11	2.45e-09	16.5613	55.6191	up		Heavy metal transport/detoxification superfamily protein
FvH4_3g06690	3.35397	3.02e-11	2.45e-09	1.05227	9.0967	up	HCT	hydroxycinnamoyl-CoA shikimate/quinate hydroxycinnamoyl transferase
FvH4_3g03540	8.41631	3.43e-11	2.76e-09	0.0166104	4.98626	up	ANAC098,ATCUC2,CUC2	NAC (No Apical Meristem) domain transcriptional regulator superfamily protein
FvH4_6g29010	2.51618	3.97e-11	3.16e-09	2.9763	14.3778	up		Integrase-type DNA-binding superfamily protein
FvH4_7g25970	1.4477	4.08e-11	3.23e-09	38.4343	90.4013	up	ARR16,RR16	response regulator 16
FvH4_6g06330	1.9118	4.18e-11	3.3e-09	54.7354	175.846	up	ATCKX6,ATCKX7,CKX6	cytokinin oxidase/dehydrogenase 6
FvH4_6g10310	3.06799	4.43e-11	3.48e-09	3.10471	19.9501	up
FvH4_4g15270	9.10955	5.44e-11	4.24e-09	0	4.14528	up		Haloacid dehalogenase-like hydrolase (HAD) superfamily protein
FvH4_7g24060	8.591	5.88e-11	4.54e-09	0	1.942	up		HXXXD-type acyl-transferase family protein
FvH4_2g02240	2.26748	7.73e-11	5.9e-09	1.10793	4.43407	up	MRL1	Pentatricopeptide repeat (PPR) superfamily protein
FvH4_5g15220	3.30697	8.42e-11	6.37e-09	2.49246	20.3132	up	BHLH161,BNQ3	BANQUO 3
FvH4_3g04250	2.30319	8.58e-11	6.47e-09	5.94868	24.6961	up		Putative lysine decarboxylase family protein
FvH4_6g07660	4.03003	9.24e-11	6.95e-09	0.823503	13.4312	up
FvH4_5g34990	2.07934	1.49e-10	1.09e-08	0.387949	1.42678	up		P-loop containing nucleoside triphosphate hydrolases superfamily protein
FvH4_5g16850	3.22598	1.64e-10	1.2e-08	1.08292	8.34756	up	REM39,VRN1	AP2/B3-like transcriptional factor family protein
FvH4_6g40630	2.53211	1.76e-10	1.28e-08	5.51329	25.0308	up
FvH4_3g04100	2.1442	1.89e-10	1.37e-08	12.8404	49.3067	up		Haloacid dehalogenase-like hydrolase (HAD) superfamily protein
FvH4_6g15900	2.52985	2.21e-10	1.59e-08	63.9149	285.944	up		Protein of unknown function, DUF584
FvH4_5g02700	1.98924	2.35e-10	1.68e-08	2.93258	10.1612	up	ATT1,CYP86A2	cytochrome P450, family 86, subfamily A, polypeptide 2
FvH4_7g08560	1.59206	2.42e-10	1.72e-08	51.7646	131.05	up	CER1	Fatty acid hydroxylase superfamily
FvH4_4g08330	1.49899	2.63e-10	1.85e-08	59.9797	141.272	up		P-loop containing nucleoside triphosphate hydrolases superfamily protein
FvH4_2g30710	1.46222	2.87e-10	2.02e-08	71.1034	161.124	up		selenium binding
FvH4_6g46890	2.06153	2.91e-10	2.04e-08	10.8228	39.1326	up	scpl25	serine carboxypeptidase-like 25
FvH4_6g08700	5.8471	3.16e-10	2.21e-08	0.181357	9.42755	up
FvH4_2g26410	1.77169	3.18e-10	2.21e-08	5.29779	15.0728	up	LAX3	like AUX1 3
FvH4_5g04160	1.94679	3.22e-10	2.24e-08	8.9042	27.6622	up	GT72B1,UGT72B1	UDP-Glycosyltransferase superfamily protein
FvH4_1g13930	6.53154	3.35e-10	2.31e-08	0.814155	56.8347	up	ATHB40,HB-5,HB40	homeobox protein 40
FvH4_4g05050	7.07388	3.4e-10	2.34e-08	0.851048	80.2211	up		AWPM-19-like family protein
FvH4_7g22282	3.67815	3.42e-10	2.34e-08	0.300278	2.83137	up	AT-HSC70-1,HSC70,HSC70-1,HSP70-1	heat shock cognate protein 70-1
FvH4_4g23190	2.4001	3.63e-10	2.48e-08	36.4386	151.145	up	ROXY2	Thioredoxin superfamily protein
FvH4_7g16760	2.59923	4.41e-10	2.95e-08	3.79858	19.2274	up		AP2/B3-like transcriptional factor family protein
FvH4_5g37110	1.60187	5.18e-10	3.46e-08	4.2294	10.7904	up		Outer arm dynein light chain 1 protein
FvH4_5g00760	1.80353	5.41e-10	3.59e-08	19.1465	54.5967	up
FvH4_6g38270	2.85286	5.45e-10	3.61e-08	0.614312	3.81054	up	ATGPAT1,GPAT1	glycerol-3-phosphate acyltransferase 1
FvH4_2g41130	1.48305	5.66e-10	3.73e-08	11.5442	28.5437	up	ENP,MAB4,NPY1	Phototropic-responsive NPH3 family protein
FvH4_3g37550	1.68063	5.95e-10	3.91e-08	10.8388	28.9525	up		Serine protease inhibitor (SERPIN) family protein
FvH4_2g26430	1.73754	6.2e-10	4.06e-08	2.89838	8.50245	up		camphor resistance CrcB family protein
FvH4_2g26190	8.22348	7.46e-10	4.85e-08	0	2.41128	up	MCT1	MEI2 C-terminal RRM only like 1
FvH4_5g20380	3.29719	7.54e-10	4.88e-08	0.56057	3.44706	up	ATCAT6,CAT6	cationic amino acid transporter 6
FvH4_3g04010	3.04957	7.88e-10	5.08e-08	1.11374	7.40631	up	DFL1,GH3.6	Auxin-responsive GH3 family protein
FvH4_5g35000	2.74655	8.47e-10	5.45e-08	1.86988	9.64881	up		Tetratricopeptide repeat (TPR)-like superfamily protein
FvH4_1g04810	2.45905	9.98e-10	6.32e-08	1.17441	6.01282	up	AT-HSFC1,HSFC1	heat shock transcription factor C1
FvH4_2g38020	8.51142	1.03e-09	6.5e-08	0	1.97877	up		DC1 domain-containing protein
FvH4_6g04860	2.23387	1.14e-09	7.08e-08	2.57546	11.3072	up	BON3	Calcium-dependent phospholipid-binding Copine family protein
FvH4_6g11850	1.65027	1.18e-09	7.33e-08	6.23671	16.5401	up	ATGPAT6,GPAT6	glycerol-3-phosphate acyltransferase 6
FvH4_4g29520	8.81851	1.32e-09	8.12e-08	0	7.41856	up
FvH4_2g15200	2.45339	1.4e-09	8.61e-08	1.87044	8.47605	up	ACR3	ACT domain repeat 3
FvH4_5g33530	2.03416	1.41e-09	8.62e-08	4.06545	14.2244	up	AAP6	amino acid permease 6
FvH4_6g26030	1.89879	1.52e-09	9.25e-08	80.9776	242.71	up	RBCS1A	ribulose bisphosphate carboxylase small chain 1A
FvH4_5g35050	2.23734	1.58e-09	9.55e-08	2.92037	11.481	up		Tetratricopeptide repeat (TPR)-like superfamily protein
FvH4_6g42780	1.92466	1.58e-09	9.55e-08	2.11418	7.10108	up	ATCSLB03,ATCSLB3,CSLB03	cellulose synthase-like B3
FvH4_1g15510	1.96326	1.63e-09	9.8e-08	4.33831	14.3228	up	ASL1,LBD36	ASYMMETRIC LEAVES 2-like 1
FvH4_2g38030	2.61076	1.66e-09	9.96e-08	3.49421	17.058	up		Thioredoxin superfamily protein
FvH4_6g53980	1.70896	1.69e-09	1.01e-07	6.12733	17.548	up	DRB5	dsRNA-binding protein 5
FvH4_2g13410	1.83196	1.89e-09	1.12e-07	17.0376	50.0808	up
FvH4_3g09450	4.07734	2.01e-09	1.19e-07	1.61457	22.2422	up
FvH4_6g53990	2.83752	2.11e-09	1.24e-07	1.95612	10.5104	up	SRG3	senescence-related gene 3
FvH4_5g34930	2.85285	2.27e-09	1.33e-07	2.00205	12.6254	up		Tetratricopeptide repeat (TPR)-like superfamily protein
FvH4_6g11950	2.01131	2.43e-09	1.42e-07	4.39796	14.5068	up		Duplicated homeodomain-like superfamily protein
FvH4_6g13030	1.99537	2.46e-09	1.43e-07	5.57838	19.1822	up		NAD(P)-linked oxidoreductase superfamily protein
FvH4_6g13360	3.29354	2.53e-09	1.47e-07	5.82046	44.008	up
FvH4_6g41510	1.6456	2.65e-09	1.53e-07	7.91156	20.7733	up	SCN1	Immunoglobulin E-set superfamily protein
FvH4_6g48630	1.7953	2.99e-09	1.72e-07	20.594	58.9342	up	ATMYB30,MYB30	myb domain protein 30
FvH4_6g40583	2.94301	3.05e-09	1.75e-07	2.47786	14.4771	up		Galactose oxidase/kelch repeat superfamily protein
FvH4_6g42870	2.12333	3.11e-09	1.78e-07	1.42551	4.81935	up	ATWRKY6,WRKY6	WRKY family transcription factor
FvH4_7g16040	1.80243	3.32e-09	1.89e-07	16.2189	46.5833	up	FIN219,JAR1	Auxin-responsive GH3 family protein
FvH4_3g04550	6.86693	3.34e-09	1.89e-07	0.0462283	4.68744	up		lysine decarboxylase family protein
FvH4_4g01980	1.54022	3.48e-09	1.96e-07	16.0795	39.1207	up	KCS2	3-ketoacyl-CoA synthase 2
FvH4_5g07890	1.58136	3.87e-09	2.17e-07	4.18639	10.6003	up		Leucine-rich repeat protein kinase family protein
FvH4_3g23680	1.82517	3.93e-09	2.2e-07	84.1867	236.087	up
FvH4_6g05280	3.00822	4.07e-09	2.26e-07	1.31802	8.6257	up		F-box/RNI-like superfamily protein
FvH4_4g03010	6.83867	4.45e-09	2.44e-07	0.0421008	4.06806	up	FLO10,FON1,SUP	C2H2 and C2HC zinc fingers superfamily protein
FvH4_6g08340	1.40647	4.45e-09	2.44e-07	943.309	2069.19	up
FvH4_1g12330	1.48234	5.03e-09	2.71e-07	6.9499	15.8381	up	ROT3	Cytochrome P450 superfamily protein
FvH4_4g29610	2.61846	5.51e-09	2.94e-07	4.46895	22.2064	up	AGL3,SEP4	K-box region and MADS-box transcription factor family protein
FvH4_1g20390	1.47802	5.74e-09	3.06e-07	3.75119	8.72069	up	ABCG11,ATWBC11,COF1,DSO,WBC11	white-brown complex homolog protein 11
FvH4_6g48110	1.50287	6.1e-09	3.24e-07	16.8432	40.4863	up	ATMIXTA,ATMYB16,MYB16	myb domain protein 16
FvH4_3g37540	2.394	6.46e-09	3.42e-07	6.50066	26.8946	up
FvH4_4g18470	1.78942	6.87e-09	3.62e-07	142.973	394.712	up	ATDI21,DI21	drought-induced 21
FvH4_3g08450	1.19115	6.95e-09	3.66e-07	46.8452	89.4557	up	ARF3,ETT	Transcriptional factor B3 family protein / auxin-responsive factor AUX/IAA-related
FvH4_5g02070	2.73158	7.41e-09	3.85e-07	0.824584	4.9028	up	ATSR,SR	serine racemase
FvH4_7g23960	2.58347	7.41e-09	3.85e-07	2.34753	11.1328	up	SBPASE	sedoheptulose-bisphosphatase
FvH4_5g02090	2.08368	7.72e-09	3.99e-07	1.26336	4.42814	up	HMA5	heavy metal atpase 5
FvH4_6g39845	8.01954	7.73e-09	3.99e-07	0.159338	2.23792	up	AtUGT85A3,UGT85A3	UDP-glucosyl transferase 85A3
FvH4_3g28760	1.38441	8.14e-09	4.19e-07	13.3987	28.9884	up	MAR1,TOC75-III	translocon at the outer envelope membrane of chloroplasts 75-III
FvH4_5g03090	1.75204	8.33e-09	4.28e-07	5.59869	15.5921	up
FvH4_3g27720	2.04286	8.36e-09	4.28e-07	4.17999	14.8694	up		F-box family protein
FvH4_3g06720	3.46111	9.02e-09	4.6e-07	0.551105	6.14684	up	AG	K-box region and MADS-box transcription factor family protein
FvH4_3g27920	2.03588	9.16e-09	4.66e-07	3.94544	13.592	up	LRP1	Lateral root primordium (LRP) protein-related
FvH4_1g12780	1.52838	9.71e-09	4.91e-07	45.5799	107.023	up
FvH4_7g19720	2.40858	1.13e-08	5.64e-07	1.41409	6.16217	up		Protein kinase superfamily protein
FvH4_7g24200	1.81776	1.15e-08	5.73e-07	4.80149	13.6994	up	AUX1,MAP1,PIR1,WAV5	Transmembrane amino acid transporter family protein
FvH4_3g16010	1.83457	1.17e-08	5.8e-07	86.3397	242.703	up
FvH4_6g28770	1.65537	1.2e-08	5.94e-07	96.2756	247.355	up	CYP77B1	cytochrome P450, family 77, subfamily B, polypeptide 1
FvH4_1g18550	1.535	1.26e-08	6.2e-07	12.9093	31.5965	up	XTH6	xyloglucan endotransglucosylase/hydrolase 6
FvH4_6g09750	2.04784	1.29e-08	6.35e-07	4.17367	15.8984	up	ATWRKY70,WRKY70	WRKY DNA-binding protein 70
FvH4_6g17371	1.8271	1.38e-08	6.72e-07	6.63074	20.0337	up	NHL1	NDR1/HIN1-like 1
FvH4_4g21970	4.84486	1.47e-08	7.07e-07	0.220687	4.68121	up		PLC-like phosphodiesterases superfamily protein
FvH4_3g13270	2.07793	1.5e-08	7.19e-07	0.77587	2.57007	up	GSO1	Leucine-rich repeat transmembrane protein kinase
FvH4_7g01370	1.52136	1.63e-08	7.78e-07	76.3233	181.955	up		Protein of unknown function, DUF642
FvH4_1g14320	1.65083	1.74e-08	8.26e-07	2.20278	5.94846	up	BLH2,SAW1	BEL1-like homeodomain 2
FvH4_1g17650	1.45032	1.91e-08	9.01e-07	12.8837	29.7171	up		Phototropic-responsive NPH3 family protein
FvH4_7g31780	3.2632	1.93e-08	9.08e-07	5.80309	42.0978	up
FvH4_3g24571	1.9815	2.03e-08	9.51e-07	6.46618	22.4877	up	CER4,FAR3,G7	Jojoba acyl CoA reductase-related male sterility protein
FvH4_6g38100	1.42806	2.03e-08	9.52e-07	685.37	1539.55	up	PDF1	protodermal factor 1
FvH4_4g29730	2.13165	2.15e-08	1e-06	13.5861	46.807	up	PGL1	6-phosphogluconolactonase 1
FvH4_6g19720	3.17522	2.44e-08	1.12e-06	2.39039	16.702	up		NAD(P)-binding Rossmann-fold superfamily protein
FvH4_4g26362	2.3226	2.46e-08	1.13e-06	1.88246	7.84611	up		MATE efflux family protein
FvH4_7g28290	1.18669	2.47e-08	1.13e-06	74.68	143.388	up	ERL1	ERECTA-like 1
FvH4_6g11180	4.01595	2.5e-08	1.14e-06	0.639293	7.95863	up	AT3,ATEM1,EM1,GEA1	Stress induced protein
FvH4_6g16343	1.93459	2.91e-08	1.31e-06	22.6105	63.8449	up	CLV3	CLAVATA3
FvH4_5g19030	1.61835	2.96e-08	1.33e-06	5.77923	14.9596	up		C2H2-like zinc finger protein
FvH4_2g06480	1.74537	3.03e-08	1.36e-06	8.47266	22.9533	up	ATCXE13,CXE13	carboxyesterase 13
FvH4_3g17990	1.3891	3.13e-08	1.39e-06	8.56708	18.8972	up	BEH4	BES1/BZR1 homolog 4
FvH4_6g43390	1.23417	3.37e-08	1.5e-06	31.9981	63.0087	up	HDG2	homeodomain GLABROUS 2
FvH4_2g07080	3.59881	3.39e-08	1.5e-06	2.58227	10.2221	up		2-oxoglutarate (2OG) and Fe(II)-dependent oxygenase superfamily protein
FvH4_5g36070	8.01107	3.49e-08	1.54e-06	0	1.24347	up
FvH4_4g17940	2.49944	3.55e-08	1.56e-06	1.25438	4.49244	up		Heavy metal transport/detoxification superfamily protein
FvH4_3g14550	1.4989	3.64e-08	1.6e-06	13.7219	31.9115	up		Cation efflux family protein
FvH4_6g31720	2.42792	3.65e-08	1.6e-06	2.61747	10.4496	up		D-isomer specific 2-hydroxyacid dehydrogenase family protein
FvH4_3g37660	2.21479	3.77e-08	1.64e-06	49.599	198.902	up	AB140,CAB1,CAB140,LHCB1.3	chlorophyll A/B binding protein 1
FvH4_1g21450	1.44702	4.74e-08	2.03e-06	139.074	316.644	up	ATIPS2,ATMIPS2,MIPS2	myo-inositol-1-phosphate synthase 2
FvH4_3g16760	6.74782	4.81e-08	2.06e-06	0.754655	54.7249	up	ATGA2OX1,GA2OX1	Arabidopsis thaliana gibberellin 2-oxidase 1
FvH4_7g13350	1.26945	4.84e-08	2.07e-06	31.8702	64.5851	up	AHDP,ANL2	Homeobox-leucine zipper family protein / lipid-binding START domain-containing protein
FvH4_1g10192	2.89035	4.86e-08	2.07e-06	0.375395	2.47119	up	ATGLR3.5,GLR3.5,GLR6	glutamate receptor 3.5
FvH4_5g09640	2.08429	4.87e-08	2.07e-06	3.36153	13.2368	up
FvH4_1g21810	1.77834	5.06e-08	2.15e-06	12.5237	34.8858	up	RHA2A	RING-H2 finger A2A
FvH4_6g42740	1.42662	5.39e-08	2.26e-06	11.3232	25.234	up	CYP74B2,HPL1	hydroperoxide lyase 1
FvH4_1g05320	4.28249	5.72e-08	2.38e-06	5.70813	82.1615	up		alpha/beta-Hydrolases superfamily protein
FvH4_2g41260	1.33807	6.34e-08	2.63e-06	41.9156	87.6262	up	ATCIMS,ATMETS,ATMS1	Cobalamin-independent synthase family protein
FvH4_3g08740	1.82942	6.57e-08	2.72e-06	1.92467	6.17478	up	NSL1	MAC/Perforin domain-containing protein
FvH4_6g39540	2.0451	6.75e-08	2.78e-06	14.199	45.4672	up
FvH4_5g31840	1.8117	6.84e-08	2.81e-06	2.04898	6.35844	up		Major facilitator superfamily protein
FvH4_3g00891	3.05184	7.01e-08	2.87e-06	0.863511	5.45704	up	ATSDAT,ATTDT,TDT	tonoplast dicarboxylate transporter
FvH4_7g17340	2.96372	7.07e-08	2.89e-06	2.07285	13.2836	up		SAUR-like auxin-responsive protein family
FvH4_5g35900	1.58297	7.78e-08	3.15e-06	42.6591	106.085	up	ATHB22,HB22,MEE68	homeobox protein 22
FvH4_6g47750	2.09079	7.9e-08	3.19e-06	5.15258	17.4182	up		Protein of unknown function (DUF179)
FvH4_4g01290	1.58962	8.39e-08	3.38e-06	30.1437	78.7219	up	ELIP,ELIP1	Chlorophyll A-B binding family protein
FvH4_6g20350	1.66468	8.77e-08	3.52e-06	4.27257	12.154	up	BLH1,EDA29	BEL1-like homeodomain 1
FvH4_3g16730	1.96492	9.74e-08	3.86e-06	23.91	72.7268	up	ATNCED3,NCED3,SIS7,STO1	nine-cis-epoxycarotenoid dioxygenase 3
FvH4_3g28460	1.04978	9.85e-08	3.9e-06	27.2995	48.1583	up		ABC-2 type transporter family protein
FvH4_7g28420	2.67863	9.97e-08	3.93e-06	7.56286	36.0242	up	LTP4	lipid transfer protein 4
FvH4_6g09321	4.39081	1.04e-07	4.11e-06	0.105455	2.0028	up	CYP714A1	cytochrome P450, family 714, subfamily A, polypeptide 1
FvH4_2g23310	2.0325	1.07e-07	4.19e-06	8.33553	27.0295	up	ATOFP16,OFP16	ovate family protein 16
FvH4_1g09220	1.60466	1.09e-07	4.26e-06	32.0215	79.9674	up		Plant invertase/pectin methylesterase inhibitor superfamily protein
FvH4_7g14480	1.4319	1.1e-07	4.28e-06	13.1967	29.698	up	CYP86A8,LCR	cytochrome P450, family 86, subfamily A, polypeptide 8
FvH4_7g26920	2.90622	1.15e-07	4.46e-06	0.66211	4.13614	up	ATERF-1,ERF-1	ethylene responsive element binding factor 1
FvH4_6g07220	1.64441	1.16e-07	4.5e-06	83.0235	208.765	up		Protein of unknown function (DUF1645)
FvH4_5g01641	2.55014	1.17e-07	4.53e-06	0.89937	5.11246	up	CYP87A2	cytochrome P450, family 87, subfamily A, polypeptide 2
FvH4_3g02831	2.57444	1.22e-07	4.71e-06	2.88809	12.8742	up		MATE efflux family protein
FvH4_4g23030	6.50316	1.27e-07	4.88e-06	0.11988	7.77487	up
FvH4_1g05310	1.7054	1.29e-07	4.95e-06	5.43453	15.0797	up	HCF101	ATP binding
FvH4_2g23270	1.16571	1.31e-07	5.01e-06	42.1542	82.495	up		Protein of unknown function (DUF581)
FvH4_6g14170	1.26403	1.31e-07	5.01e-06	41.8016	85.8454	up		NAD(P)-binding Rossmann-fold superfamily protein
FvH4_1g06850	1.43961	1.38e-07	5.26e-06	2.50853	5.94557	up	PHYE	phytochrome E
FvH4_1g09610	1.75621	1.49e-07	5.65e-06	9.08514	25.0958	up	ATPME44,PME44	pectin methylesterase 44
FvH4_6g07501	1.12498	1.55e-07	5.86e-06	34.0284	61.8221	up		Galactose oxidase/kelch repeat superfamily protein
FvH4_7g23780	1.54562	1.58e-07	5.97e-06	11.6083	26.8444	up	ATPROT1,PROT1	proline transporter 1
FvH4_3g38150	1.39598	1.61e-07	6.07e-06	42.6506	92.5041	up		Homeodomain-like transcriptional regulator
FvH4_4g23230	4.56246	1.75e-07	6.54e-06	0.25329	4.91697	up		SAUR-like auxin-responsive protein family
FvH4_3g27860	1.76176	1.95e-07	7.27e-06	52.1358	138.208	up		Predicted AT-hook DNA-binding family protein
FvH4_5g38350	1.95996	1.97e-07	7.31e-06	13.9127	48.9381	up
FvH4_3g08070	1.48075	2.21e-07	8.17e-06	25.0856	58.2845	up		SGNH hydrolase-type esterase superfamily protein
FvH4_1g18570	1.49782	2.3e-07	8.49e-06	15.9483	38.1542	up
FvH4_2g38230	1.50026	2.37e-07	8.7e-06	19.9114	45.0794	up	ATCLV1,CLV1,FAS3,FLO5	Leucine-rich receptor-like protein kinase family protein
FvH4_1g17140	2.05549	2.47e-07	9.07e-06	42.5428	138.468	up		Late embryogenesis abundant protein, group 6
FvH4_4g19080	8.19548	2.48e-07	9.08e-06	0.105298	4.51615	up	MLP423	MLP-like protein 423
FvH4_3g36040	7.49749	2.5e-07	9.15e-06	0	6.78703	up
FvH4_2g01570	1.20233	2.51e-07	9.15e-06	71.4278	136.91	up	LAX2	like AUXIN RESISTANT 2
FvH4_6g49380	1.44989	2.54e-07	9.25e-06	4.19653	10.1673	up		Phosphoglycerate mutase-like family protein
FvH4_3g03630	1.79144	2.69e-07	9.76e-06	5.97786	17.1716	up	AGL24	AGAMOUS-like 24
FvH4_3g24670	1.78277	3.09e-07	1.11e-05	3.40751	9.00065	up		NAD+ ADP-ribosyltransferases;NAD+ ADP-ribosyltransferases
FvH4_7g16111	4.43925	3.27e-07	1.18e-05	0.098812	1.88767	up		NAD(P)-binding Rossmann-fold superfamily protein
FvH4_1g04750	1.62369	3.34e-07	1.2e-05	3.86052	9.89478	up	ATPLT5,ATPMT5,PMT5	polyol/monosaccharide transporter 5
FvH4_4g32480	1.40353	3.51e-07	1.26e-05	11.6195	23.835	up	scpl50	serine carboxypeptidase-like 50
FvH4_3g16190	1.5884	3.58e-07	1.28e-05	6.16637	15.4005	up	PK3AT,WAG1	WAG 1
FvH4_2g24370	2.05414	3.72e-07	1.32e-05	138.673	445.741	up	ATGID1B,GID1B	alpha/beta-Hydrolases superfamily protein
FvH4_6g42090	2.35964	3.87e-07	1.36e-05	1.48114	6.37796	up	ACO4,EAT1,EFE	ethylene-forming enzyme
FvH4_6g46730	1.79044	3.94e-07	1.39e-05	8.01516	23.3408	up	PTF1,TCP13,TFPD	plastid transcription factor 1
FvH4_5g30170	1.17007	4.07e-07	1.42e-05	173.694	320.941	up	ARPN	plantacyanin
FvH4_3g32680	2.15772	4.15e-07	1.45e-05	2.02227	7.41785	up	ATFLA11,FLA11	FASCICLIN-like arabinogalactan-protein 11
FvH4_7g23330	3.43294	4.26e-07	1.48e-05	0.252602	2.61614	up		Protein of unknown function (DUF668)
FvH4_5g06120	7.31206	4.27e-07	1.48e-05	0	1.27105	up		Adenine nucleotide alpha hydrolases-like superfamily protein
FvH4_7g01410	1.30759	4.28e-07	1.48e-05	27.2299	55.7868	up		HXXXD-type acyl-transferase family protein
FvH4_2g34960	3.81081	4.49e-07	1.55e-05	0.385068	4.62132	up		Protein of unknown function, DUF617
FvH4_6g09980	1.41137	4.64e-07	1.6e-05	721.226	1592.68	up	LTP3	lipid transfer protein 3
FvH4_3g05750	2.69809	4.72e-07	1.62e-05	0.479069	2.44057	up	CYP710A1	cytochrome P450, family 710, subfamily A, polypeptide 1
FvH4_7g05960	1.48372	4.75e-07	1.63e-05	21.7514	49.8946	up	CYP77A4	cytochrome P450, family 77, subfamily A, polypeptide 4
FvH4_6g07630	1.79093	4.77e-07	1.63e-05	36.1303	99.1064	up		basic helix-loop-helix (bHLH) DNA-binding superfamily protein
FvH4_6g39380	2.48984	4.9e-07	1.67e-05	3.86831	16.7349	up	HYR1	UDP-Glycosyltransferase superfamily protein
FvH4_4g17600	1.75196	5.06e-07	1.72e-05	3.1325	9.37552	up		Protein kinase superfamily protein
FvH4_6g47650	1.84539	5.06e-07	1.72e-05	4.49578	11.646	up		Saccharopine dehydrogenase
FvH4_4g25340	1.73729	5.21e-07	1.76e-05	4.71727	12.7693	up		Cellulase (glycosyl hydrolase family 5) protein
FvH4_6g17450	1.57	5.54e-07	1.86e-05	12.9888	34.1896	up	ATHB51,HB51,LMI1	homeobox 51
FvH4_7g03120	2.17884	5.76e-07	1.93e-05	3.56504	13.6974	up	GAMMA-TIP,GAMMA-TIP1,TIP1;1	gamma tonoplast intrinsic protein
FvH4_7g28730	2.3297	5.91e-07	1.98e-05	1.48505	6.42762	up
FvH4_4g27420	1.4674	5.97e-07	2e-05	42.8877	96.7459	up	CER6,CUT1,G2,KCS6,POP1	3-ketoacyl-CoA synthase 6
FvH4_5g16630	5.99086	6.31e-07	2.1e-05	0.474226	24.4491	up
FvH4_2g33440	2.63292	6.42e-07	2.13e-05	0.420533	2.04824	up	APUM12,PUM12	pumilio 12
FvH4_3g38970	5.11436	6.41e-07	2.13e-05	17.7534	430.058	up	ASN1,AT-ASN1,DIN6	glutamine-dependent asparagine synthase 1
FvH4_5g15490	1.91848	6.46e-07	2.14e-05	7.2292	21.0508	up	ATHIR1,HIR1	SPFH/Band 7/PHB domain-containing membrane-associated protein family
FvH4_4g25390	2.88848	7.17e-07	2.34e-05	1.49307	4.9051	up	CYP71B34	cytochrome P450, family 71, subfamily B, polypeptide 34
FvH4_4g37361	1.26174	7.44e-07	2.42e-05	8.53179	17.6103	up	AGAL1,AtAGAL1	alpha-galactosidase 1
FvH4_6g08930	2.99312	7.98e-07	2.57e-05	2.7971	15.052	up	ATPPCK1,PPCK1	phosphoenolpyruvate carboxylase kinase 1
FvH4_2g27662	1.21406	8.56e-07	2.75e-05	12.4051	23.9696	up	AAP3,ATAAP3	amino acid permease 3
FvH4_2g20660	1.7982	8.8e-07	2.81e-05	2.10463	6.13591	up		Glutathione S-transferase family protein
FvH4_4g21480	1.11697	8.79e-07	2.81e-05	20.676	38.2511	up	ATPDHK,PDK	pyruvate dehydrogenase kinase
FvH4_7g17790	1.42189	8.79e-07	2.81e-05	16.2634	36.7222	up		basic helix-loop-helix (bHLH) DNA-binding superfamily protein
FvH4_6g45050	1.94988	8.88e-07	2.83e-05	16.9288	52.2847	up	PSB27	photosystem II family protein
FvH4_1g17370	2.44143	8.99e-07	2.86e-05	2.43534	11.3509	up		GRAS family transcription factor
FvH4_1g24450	1.67573	9.01e-07	2.87e-05	2.22252	5.81932	up	PUB25	plant U-box 25
FvH4_5g13090	1.8495	9.42e-07	2.99e-05	7.30964	20.7692	up
FvH4_5g08580	1.41285	9.88e-07	3.12e-05	10.2915	24.0761	up		Squamosa promoter-binding protein-like (SBP domain) transcription factor family protein
FvH4_5g25460	3.34854	9.89e-07	3.12e-05	1.58796	12.1957	up		Protein of unknown function (DUF833)
FvH4_6g17500	1.43611	1.01e-06	3.17e-05	27.4769	60.9276	up		Leucine-rich repeat protein kinase family protein
FvH4_7g04511	1.53077	1.05e-06	3.28e-05	6.70747	12.7441	up
FvH4_6g45800	1.41566	1.07e-06	3.34e-05	85.6487	185.736	up		Late embryogenesis abundant protein (LEA) family protein
FvH4_6g13610	1.33992	1.09e-06	3.4e-05	132.686	278.285	up	ATEXP4,ATEXPA4,ATHEXP,ALPHA,1.6,EXPA4	expansin A4
FvH4_1g01300	1.78826	1.16e-06	3.59e-05	2.0682	6.03151	up	ARR12,RR12	response regulator 12
FvH4_1g14040	1.84095	1.22e-06	3.79e-05	68.2074	193.725	up	BZR1	Brassinosteroid signalling positive regulator (BZR1) family protein
FvH4_7g27470	3.0541	1.24e-06	3.83e-05	1.01526	5.03205	up	PEX11B	peroxin 11B
FvH4_6g20570	2.40844	1.27e-06	3.88e-05	0.639448	3.01498	up
FvH4_3g12500	1.79751	1.3e-06	3.95e-05	2.48614	7.62028	up	KUP11	K+ uptake permease 11
FvH4_5g36540	1.72459	1.3e-06	3.95e-05	5.33931	13.6067	up		NAD(P)-binding Rossmann-fold superfamily protein
FvH4_5g18770	2.0615	1.31e-06	3.99e-05	3.47913	11.2501	up		Eukaryotic aspartyl protease family protein
FvH4_1g11491	1.99839	1.34e-06	4.07e-05	14.0502	44.4048	up	APX3	ascorbate peroxidase 3
FvH4_4g25080	1.67332	1.35e-06	4.09e-05	29.6261	78.18	up	PSBY,YCF32	photosystem II BY
FvH4_3g02520	1.09227	1.36e-06	4.12e-05	35.7829	64.3176	up	PDF2	protodermal factor 2
FvH4_2g01060	1.37763	1.37e-06	4.14e-05	12.9384	28.3917	up
FvH4_6g12850	2.20986	1.4e-06	4.21e-05	2.32814	8.61662	up		Protein of unknown function, DUF617
FvH4_6g13640	1.23305	1.42e-06	4.25e-05	53.4722	103.236	up	AS1,ATMYB91,ATPHAN,MYB91	myb-like HTH transcriptional regulator family protein
FvH4_7g14440	1.53669	1.43e-06	4.3e-05	35.4833	81.8544	up	AtGPAT8,GPAT8	glycerol-3-phosphate acyltransferase 8
FvH4_3g38930	2.33952	1.46e-06	4.38e-05	0.383461	1.63346	up		PHD finger transcription factor, putative
FvH4_7g24760	6.83393	1.46e-06	4.38e-05	0.0145984	1.76335	up	ABI4,ATABI4,GIN6,ISI3,SAN5,SIS5,SUN6	Integrase-type DNA-binding superfamily protein
FvH4_5g01260	1.61276	1.47e-06	4.38e-05	14.2003	36.0829	up	IXR11,KNAT7	KNOTTED-like homeobox of Arabidopsis thaliana 7
FvH4_2g31280	3.09801	1.51e-06	4.47e-05	0.2186	1.94488	up	AL3	alfin-like 3
FvH4_1g24360	1.3217	1.57e-06	4.67e-05	15.6367	32.5141	up	PSAN	photosystem I reaction center subunit PSI-N, chloroplast, putative / PSI-N, putative (PSAN)
FvH4_5g36230	4.7169	1.6e-06	4.74e-05	0.0958541	1.93819	up		RING/U-box superfamily protein
FvH4_5g37780	3.82927	1.61e-06	4.76e-05	0.279055	3.626	up		Haloacid dehalogenase-like hydrolase (HAD) superfamily protein
FvH4_6g18440	1.36192	1.61e-06	4.76e-05	33.3681	77.6489	up	ZPR3	protein binding
FvH4_2g29850	1.09705	1.62e-06	4.77e-05	21.105	38.0272	up	AtDBP1,DBP1	DNA-binding protein phosphatase 1
FvH4_4g30170	1.03581	1.64e-06	4.84e-05	26.6499	47.6044	up	APE2,TPT	Glucose-6-phosphate/phosphate translocator-related
FvH4_3g39090	1.77696	1.7e-06	5.01e-05	7.07349	18.823	up	ATL2,TL2	TOXICOS EN LEVADURA 2
FvH4_6g02170	1.40269	1.9e-06	5.52e-05	8.60496	19.8704	up
FvH4_3g32260	1.81913	1.95e-06	5.64e-05	5.92162	17.1115	up	PIP2;2,PIP2B	plasma membrane intrinsic protein 2
FvH4_2g19680	1.25653	2.01e-06	5.8e-05	954.482	1897.58	up
FvH4_2g33260	2.87447	2.04e-06	5.87e-05	1.32551	7.47164	up	LBD39	LOB domain-containing protein 39
FvH4_4g27300	1.81108	2.05e-06	5.91e-05	3.88739	10.9175	up	JAG	C2H2 and C2HC zinc fingers superfamily protein
FvH4_2g01740	1.42544	2.07e-06	5.96e-05	8.39018	18.0743	up		Pollen Ole e 1 allergen and extensin family protein
FvH4_3g39410	1.27338	2.08e-06	5.97e-05	52.9217	105.428	up	LSH6	Protein of unknown function (DUF640)
FvH4_5g06770	9.90841	2.11e-06	6.03e-05	0.0561899	6.46026	up		Cysteine proteinases superfamily protein
FvH4_3g13210	1.34865	2.13e-06	6.1e-05	21.8495	45.145	up	ATFKBP13,FKBP13	FK506-binding protein 13
FvH4_3g38780	1.18129	2.18e-06	6.23e-05	57.3614	107.752	up	FAD8	fatty acid desaturase 8
FvH4_4g31561	1.16375	2.24e-06	6.36e-05	12.196	22.9475	up		Galactose oxidase/kelch repeat superfamily protein
FvH4_3g34690	1.69782	2.35e-06	6.66e-05	2.53483	6.974	up	KCS12	3-ketoacyl-CoA synthase 12
FvH4_1g21890	1.12708	2.39e-06	6.75e-05	89.4136	168.387	up
FvH4_4g24990	2.14958	2.43e-06	6.87e-05	1.8529	7.25177	up	ATKCR2,KCR2	beta-ketoacyl reductase 2
FvH4_4g32750	1.89842	2.46e-06	6.93e-05	13.2298	42.9918	up	MLP28	MLP-like protein 28
FvH4_7g10740	2.23286	2.47e-06	6.93e-05	35.0943	122.787	up	GATA4	GATA transcription factor 4
FvH4_4g05700	5.23225	2.63e-06	7.33e-05	1.97841	54.7757	up
FvH4_6g53960	2.06844	2.67e-06	7.42e-05	1.45293	4.61504	up	PBS1	Protein kinase superfamily protein
FvH4_5g09790	2.00412	2.69e-06	7.47e-05	3.23045	10.4835	up
FvH4_3g35730	4.1814	2.71e-06	7.53e-05	0.152207	2.32868	up	WOX2	WUSCHEL related homeobox 2
FvH4_1g15260	2.79432	2.72e-06	7.55e-05	1.64013	9.28506	up	ATMES1,MES1	methyl esterase 1
FvH4_4g19990	1.80264	2.76e-06	7.63e-05	3.2274	10.0271	up	VDD	VERDANDI
FvH4_5g03030	7.21479	2.85e-06	7.87e-05	0	3.85416	up	SP1L2	SPIRAL1-like2
FvH4_7g07390	3.2202	3.15e-06	8.64e-05	1.28064	6.24555	up	ATGSTU8,GSTU8	glutathione S-transferase TAU 8
FvH4_4g35790	1.58198	3.19e-06	8.74e-05	237.342	562.331	up	ATUGT85A1,UGT85A1	UDP-Glycosyltransferase superfamily protein
FvH4_4g31520	1.58184	3.23e-06	8.83e-05	4.65185	12.1886	up	AtTCP14,TCP14	TEOSINTE BRANCHED, cycloidea and PCF (TCP) 14
FvH4_5g01670	2.55917	3.24e-06	8.85e-05	0.605823	3.24091	up		PAS domain-containing protein tyrosine kinase family protein
FvH4_7g15730	1.27668	3.28e-06	8.94e-05	11.9133	23.571	up	HS,HWS	Galactose oxidase/kelch repeat superfamily protein
FvH4_6g15180	1.05986	3.32e-06	9.05e-05	38.6296	68.9366	up	RAP2.7,TOE1	related to AP2.7
FvH4_7g34200	1.99761	3.37e-06	9.13e-05	5.00657	17.6752	up		GroES-like zinc-binding dehydrogenase family protein
FvH4_7g32780	1.37982	3.39e-06	9.17e-05	10.6699	23.0353	up	AtGRF7,GRF7	growth-regulating factor 7
FvH4_4g10810	1.37891	3.45e-06	9.32e-05	7.63229	16.663	up	ACR4,CR4	crinkly4
FvH4_6g33030	2.52172	3.48e-06	9.39e-05	1.46215	6.39769	up	ATPS2,PS2	phosphate starvation-induced gene 2
FvH4_2g25390	2.52927	3.5e-06	9.41e-05	2.62759	11.5556	up		alpha/beta-Hydrolases superfamily protein
FvH4_4g25900	1.16525	3.49e-06	9.41e-05	17.6091	33.1724	up	PHS1	poor homologous synapsis 1
FvH4_4g03100	1.55031	3.51e-06	9.44e-05	24.1844	57.6714	up
FvH4_2g00100	2.46356	3.79e-06	0.00010115	6.09418	26.4318	up		RmlC-like cupins superfamily protein
FvH4_7g19750	1.19481	3.81e-06	0.00010153	43.5991	86.2329	up	LHCA1	photosystem I light harvesting complex gene 1
FvH4_7g03110	1.08387	4.12e-06	0.00010943	14.3637	26.1562	up	LRP1	Lateral root primordium (LRP) protein-related
FvH4_7g23561	1.15218	4.2e-06	0.00011131	24.8675	45.2105	up	BLH9,BLR,HB-6,LSN,PNY,RPL,VAN	POX (plant homeobox) family protein
FvH4_6g48610	1.08141	4.26e-06	0.00011282	35.4557	62.4358	up	ATHB30,HB30,ZFHD3	homeobox protein 30
FvH4_3g00510	4.70943	4.28e-06	0.00011299	0.386594	7.45003	up
FvH4_5g09720	2.02863	4.4e-06	0.00011608	1.87194	6.40191	up
FvH4_2g25330	3.56705	4.55e-06	0.00012003	0.141959	1.42528	up	GH3.9	putative indole-3-acetic acid-amido synthetase GH3.9
FvH4_2g04630	2.22188	4.71e-06	0.00012353	5.24503	21.5454	up
FvH4_2g04120	1.58294	4.73e-06	0.00012392	5.53391	13.661	up	STZ,ZAT10	salt tolerance zinc finger
FvH4_6g42131	3.72897	4.77e-06	0.00012472	5.4826	7.77482	up	ADS3,FAD5,FADB,JB67	fatty acid desaturase 5
FvH4_2g36990	1.34089	4.97e-06	0.00012959	67.5832	139.896	up	FDH,KCS10	3-ketoacyl-CoA synthase 10
FvH4_6g09970	1.53016	5.04e-06	0.00013109	45.1572	113.086	up	LTP4	lipid transfer protein 4
FvH4_1g10560	1.80413	5.18e-06	0.0001346	1.7701	4.95981	up		AMP-dependent synthetase and ligase family protein
FvH4_3g15640	1.9962	5.21e-06	0.00013487	34.1766	88.2424	up	LOS1	Ribosomal protein S5/Elongation factor G/III/V family protein
FvH4_1g07950	1.63858	5.37e-06	0.00013876	2.02176	5.21449	up	LUT2	Lycopene beta/epsilon cyclase protein
FvH4_6g46920	1.15175	5.5e-06	0.00014148	14.7795	27.2834	up		alpha/beta-Hydrolases superfamily protein
FvH4_5g05100	1.63032	5.55e-06	0.00014269	2.90809	7.41016	up	ATTPS9,TPS9	trehalose-phosphatase/synthase 9
FvH4_6g30300	1.5996	5.76e-06	0.00014751	2.52563	6.26635	up	DMT7,DRM2	domains rearranged methyltransferase 2
FvH4_1g02620	2.65566	5.8e-06	0.00014814	1.58399	6.12502	up	DIN10	Raffinose synthase family protein
FvH4_5g04470	1.35512	5.79e-06	0.00014814	24.7218	51.9986	up		Integrase-type DNA-binding superfamily protein
FvH4_4g23750	1.14912	5.87e-06	0.00014963	99.0982	179.572	up	LHCA2	photosystem I light harvesting complex gene 2
FvH4_3g09030	1.14983	5.95e-06	0.00015088	44.1555	80.6741	up		VQ motif-containing protein
FvH4_3g15390	1.6533	5.95e-06	0.00015088	14.8267	38.895	up		SAUR-like auxin-responsive protein family
FvH4_7g29520	1.54505	6.24e-06	0.00015785	19.2518	45.1949	up		Heavy metal transport/detoxification superfamily protein
FvH4_3g02190	1.21877	6.38e-06	0.00016069	12.923	24.5696	up		oxidoreductase, zinc-binding dehydrogenase family protein
FvH4_4g14890	1.20082	6.38e-06	0.00016069	32.7852	61.7366	up		Glycoprotein membrane precursor GPI-anchored
FvH4_5g17690	1.58947	6.38e-06	0.00016069	13.697	33.3908	up	ATMKK9,MKK9	MAP kinase kinase 9
FvH4_2g06140	3.64767	6.47e-06	0.00016281	0.887514	7.81929	up		Calcium-binding EF-hand family protein
FvH4_3g04450	1.48777	6.49e-06	0.00016296	236.622	520.279	up
FvH4_6g35571	1.62969	6.95e-06	0.00017325	2.54645	6.68739	up	GLIP1	GDSL lipase 1
FvH4_1g18280	1.2571	7.13e-06	0.00017759	15.9126	30.825	up	AtRLP44,RLP44	receptor like protein 44
FvH4_4g30710	5.73201	7.22e-06	0.00017943	0.051648	2.38456	up	FT	PEBP (phosphatidylethanolamine-binding protein) family protein
FvH4_6g32190	1.34667	7.26e-06	0.00018022	20.4918	44.0969	up	GATA9	GATA transcription factor 9
FvH4_4g13360	1.88198	7.29e-06	0.0001806	4.54839	14.2523	up		HXXXD-type acyl-transferase family protein
FvH4_2g34940	3.47943	7.45e-06	0.00018413	0.578443	3.33341	up	AR781	Protein of unknown function (DUF1645)
FvH4_3g04290	2.4244	7.48e-06	0.00018481	2.87259	12.5389	up		basic helix-loop-helix (bHLH) DNA-binding family protein
FvH4_5g10840	1.35052	7.83e-06	0.00019253	11.8083	25.0662	up		alpha/beta-Hydrolases superfamily protein
FvH4_2g04020	1.365	8.01e-06	0.00019678	7.8024	16.3959	up	pde194	formyltransferase, putative
FvH4_2g23100	1.2746	8.04e-06	0.00019698	10.1918	21.5459	up	AST12,SULTR3;1	sulfate transporter 3;1
FvH4_2g33160	1.64086	8.03e-06	0.00019698	18.6575	45.4722	up		alpha/beta-Hydrolases superfamily protein
FvH4_2g36290	1.28778	8.14e-06	0.00019906	17.5761	35.4998	up	ATGLB3,GLB3	hemoglobin 3
FvH4_3g04190	4.64549	8.64e-06	0.00020976	0.61447	15.9482	up		Ribosomal protein L11 family protein
FvH4_6g34360	2.29198	8.83e-06	0.00021399	1.07302	4.82894	up	ATHAP2C,HAP2C,NF-YA3	nuclear factor Y, subunit A3
FvH4_3g18770	1.01347	8.86e-06	0.00021465	26.0206	43.7958	up		sodium/calcium exchanger family protein / calcium-binding EF hand family protein
FvH4_6g29370	1.286	8.92e-06	0.00021565	15.4758	30.3204	up		VQ motif-containing protein
FvH4_3g20690	3.73414	9.1e-06	0.0002191	7.75753	78.14	up	ANAC072,RD26	NAC (No Apical Meristem) domain transcriptional regulator superfamily protein
FvH4_3g13060	2.03911	9.13e-06	0.0002195	4.43455	5.55603	up	CAT5	cationic amino acid transporter 5
FvH4_4g06700	4.05988	9.46e-06	0.0002267	0.29914	3.8717	up	XTH23,XTR6	xyloglucan endotransglycosylase 6
FvH4_4g30350	4.47889	9.5e-06	0.00022729	0.059621	1.09728	up		C2H2-like zinc finger protein
FvH4_4g32520	1.594	9.51e-06	0.00022729	15.0909	35.5114	up		xylose isomerase family protein
FvH4_3g18841	1.0823	9.53e-06	0.00022765	162.874	283.616	up
FvH4_6g45320	3.03202	9.92e-06	0.00023632	1.63805	9.33489	up		AWPM-19-like family protein
FvH4_7g26940	1.64544	1.02e-05	0.00024118	51.611	126.728	up		Integrase-type DNA-binding superfamily protein
FvH4_3g43260	1.06193	1.02e-05	0.00024165	93.8436	164.909	up		Ribosomal protein L31e family protein
FvH4_4g07560	4.79407	1.07e-05	0.00025223	0.220169	4.32154	up
FvH4_6g50500	1.27579	1.09e-05	0.00025584	11.2823	22.7019	up		Potassium transporter family protein
FvH4_5g38881	1.0868	1.09e-05	0.00025593	325.693	571.071	up		Histone superfamily protein
FvH4_5g10750	1.21726	1.1e-05	0.00025737	6.7587	13.775	up	AtGRF8,GRF8	growth-regulating factor 8
FvH4_7g00900	1.2637	1.1e-05	0.00025767	9.75783	19.5806	up		Mog1/PsbP/DUF1795-like photosystem II reaction center PsbP family protein
FvH4_3g02920	1.35147	1.11e-05	0.00025994	96.1224	197.242	up	PSBQ,PSBQ-2,PSII-Q	photosystem II subunit Q-2
FvH4_7g21880	8.5349	1.19e-05	0.00027719	0.0211448	7.23038	up		C2H2 and C2HC zinc fingers superfamily protein
FvH4_1g00210	1.83633	1.29e-05	0.00029759	2.31852	6.61803	up	URH2	uridine-ribohydrolase 2
FvH4_6g52800	1.15769	1.31e-05	0.00030242	7.04415	13.0337	up		Ankyrin repeat family protein
FvH4_2g13890	1.47661	1.32e-05	0.00030416	9.64731	21.4132	up		Inositol monophosphatase family protein
FvH4_6g32260	2.64595	1.36e-05	0.00031265	0.815277	3.73808	up		Protein of unknown function (DUF1677)
FvH4_2g18440	1.67522	1.38e-05	0.00031529	21.4333	53.0418	up		nuclear transport factor 2 (NTF2) family protein / RNA recognition motif (RRM)-containing protein
FvH4_4g23670	1.18912	1.38e-05	0.00031587	232.018	428.566	up	LTPG1	glycosylphosphatidylinositol-anchored lipid protein transfer 1
FvH4_4g35600	1.05672	1.41e-05	0.00032127	34.0526	59.8677	up	ATGSTU17,ERD9,GST30,GST30B	Glutathione S-transferase family protein
FvH4_2g14900	1.23675	1.44e-05	0.00032888	13.3147	25.649	up	ATHM2	Thioredoxin superfamily protein
FvH4_6g36931	2.7133	1.48e-05	0.00033602	1.02805	5.58489	up		lipid-binding serum glycoprotein family protein
FvH4_1g14930	8.82622	1.48e-05	0.00033724	0	3.03018	up	ATMES10,MES10	methyl esterase 10
FvH4_2g07470	1.38692	1.49e-05	0.00033803	9.23251	19.6715	up		RING/U-box superfamily protein
FvH4_6g42990	1.0275	1.51e-05	0.00034132	34.895	58.7794	up	sks4	SKU5 similar 4
FvH4_7g22970	1.20014	1.69e-05	0.0003818	27.2252	52.1683	up	AGF2,AHL15	AT-hook protein of GA feedback 2
FvH4_4g36102	1.13005	1.71e-05	0.00038615	428.496	790.069	up	LCR69,PDF2.2	low-molecular-weight cysteine-rich 69
FvH4_5g34850	1.42245	1.85e-05	0.00041322	17.8545	41.3004	up	CER2,VC-2,VC2	HXXXD-type acyl-transferase family protein
FvH4_3g22510	1.68491	1.87e-05	0.0004171	3.74509	9.65924	up	ATPAP18,PAP18	purple acid phosphatase 18
FvH4_5g36970	1.36538	2.04e-05	0.0004511	20.1795	40.9494	up	ATUGT85A1,UGT85A1	UDP-Glycosyltransferase superfamily protein
FvH4_5g06350	1.19975	2.05e-05	0.00045294	66.6044	123.536	up	ATRAB8D,ATRABE1B,RABE1b	RAB GTPase homolog E1B
FvH4_6g38680	1.29099	2.06e-05	0.00045467	10.3339	20.8754	up	ATMYB66,MYB66,WER,WER1	myb domain protein 66
FvH4_7g26540	1.2273	2.07e-05	0.00045613	16.3371	31.0029	up	GDH2	glutamate dehydrogenase 2
FvH4_3g23730	1.22873	2.09e-05	0.00046135	3.92315	8.12229	up	ATFIM1,FIM1	fimbrin 1
FvH4_4g36104	1.22834	2.13e-05	0.00046805	299.904	582.348	up	LCR69,PDF2.2	low-molecular-weight cysteine-rich 69
FvH4_7g19610	1.42376	2.2e-05	0.00048336	52.3107	110.722	up		alpha/beta-Hydrolases superfamily protein
FvH4_3g41310	1.43435	2.23e-05	0.00048821	5.09117	9.06984	up	LAS,SCL18	GRAS family transcription factor
FvH4_5g23750	1.22573	2.23e-05	0.00048821	12.3664	23.8761	up	UFD1	ubiquitin fusion degradation 1
FvH4_4g20640	2.29301	2.24e-05	0.00049046	2.39563	9.23373	up
FvH4_4g12130	1.93513	2.29e-05	0.00049876	1.0554	3.54983	up		P-loop containing nucleoside triphosphate hydrolases superfamily protein
FvH4_1g26810	1.01016	2.38e-05	0.00051579	21.5831	38.0386	up	CER8,LACS1	AMP-dependent synthetase and ligase family protein
FvH4_5g10640	2.33589	2.41e-05	0.00052111	2.21652	8.55021	up		GroES-like zinc-binding dehydrogenase family protein
FvH4_7g13150	1.50206	2.49e-05	0.00053727	3.7989	9.31814	up	ATXTH27,EXGT-A3,XTH27	endoxyloglucan transferase A3
FvH4_6g04940	1.10404	2.54e-05	0.00054817	10.5161	19.8311	up
FvH4_2g32670	1.15653	2.62e-05	0.00056466	41.5194	75.3327	up	AtGRF1,GRF1	growth-regulating factor 1
FvH4_7g00250	1.93903	2.64e-05	0.00056665	7.14862	7.98612	up	BGLU17	beta glucosidase 17
FvH4_3g21740	1.67318	2.65e-05	0.00056917	2.26986	6.07108	up		Domain of unknown function (DUF1995)
FvH4_6g39031	1.36188	2.67e-05	0.00057244	3.08705	7.02092	up	WAKL1	wall associated kinase-like 1
FvH4_7g22280	1.35127	2.72e-05	0.00058334	1.22612	2.71235	up	ERD2,HSP70T-1	heat shock protein 70 (Hsp 70) family protein
FvH4_3g05890	1.49725	2.78e-05	0.00059032	6.50852	12.6286	up
FvH4_3g06513	1.95885	2.81e-05	0.00059613	3.78005	10.433	up	ATSRG1,SRG1	senescence-related gene 1
FvH4_4g30100	4.21214	2.86e-05	0.00060453	0.0913263	1.45265	up	ATUPS2,UPS2	ureide permease 2
FvH4_1g17941	1.17253	2.89e-05	0.0006097	11.5317	21.343	up		Galactosyl transferase GMA12/MNN10 family protein
FvH4_6g44380	2.4418	2.9e-05	0.00061103	0.481651	2.25655	up	ATENT3,ENT3,FUR1	Major facilitator superfamily protein
FvH4_2g29750	1.03122	2.93e-05	0.00061536	25.6057	43.8103	up	KCS11	3-ketoacyl-CoA synthase 11
FvH4_6g14991	1.36802	2.92e-05	0.00061536	5.05948	10.9604	up	CPR30	F-box and associated interaction domains-containing protein
FvH4_2g03590	2.22317	3.05e-05	0.00064029	3.158	11.2544	up
FvH4_3g33880	1.57633	3.12e-05	0.00065113	1.54375	3.91492	up	NAXT1	nitrate excretion transporter1
FvH4_1g02190	1.37998	3.12e-05	0.00065136	85.6137	175.014	up	ATAVP3,AtVHP1;1,AVP-3,AVP1	Inorganic H pyrophosphatase family protein
FvH4_1g11760	4.43553	3.21e-05	0.0006665	0.271935	4.4052	up		Chaperone DnaJ-domain superfamily protein
FvH4_3g21630	1.19321	3.28e-05	0.00068096	22.0221	41.566	up		zinc finger protein-related
FvH4_2g39150	3.14689	3.3e-05	0.00068422	0.268451	2.22921	up		glyoxal oxidase-related protein
FvH4_7g17930	1.64648	3.3e-05	0.00068428	1.73118	4.56871	up	NGA1	AP2/B3-like transcriptional factor family protein
FvH4_3g04170	1.71841	3.38e-05	0.00069869	3.64305	9.68938	up	LFY,LFY3	floral meristem identity control protein LEAFY (LFY)
FvH4_1g14070	1.37793	3.41e-05	0.0007032	30.8715	64.2239	up	GGPS1	geranylgeranyl pyrophosphate synthase 1
FvH4_6g07720	1.56582	3.41e-05	0.00070428	1.89691	4.83212	up		F-box family protein
FvH4_6g19871	1.37428	3.56e-05	0.00073358	10.8098	22.383	up	ATOFP6,OFP6	ovate family protein 6
FvH4_7g15860	2.0334	3.59e-05	0.00073822	1.27961	4.39649	up	CRF4	cytokinin response factor 4
FvH4_2g33280	1.07197	3.64e-05	0.000746	83.6193	142.079	up		Glycosyl hydrolase family 35 protein
FvH4_6g32440	6.71569	3.64e-05	0.00074629	0	0.976302	up	AB140,CAB1,CAB140,LHCB1.3	chlorophyll A/B binding protein 1
FvH4_3g00750	1.44908	3.68e-05	0.00075219	4.68036	10.4022	up	ATINT4,INT4	inositol transporter 4
FvH4_6g08190	1.27396	3.82e-05	0.00077847	164.688	318.625	up	ATRL6,RL6,RSM3	RAD-like 6
FvH4_4g00470	2.28594	3.83e-05	0.00077862	0.582892	2.43213	up	PTAC5	plastid transcriptionally active 5
FvH4_3g08160	1.95628	3.87e-05	0.00078446	2.10529	7.21145	up	MEE35,TCP4	TCP family transcription factor 4
FvH4_6g34980	6.56153	3.97e-05	0.0008013	0	1.58302	up
FvH4_4g26250	1.78799	4e-05	0.0008075	2.39434	6.5883	up		RNI-like superfamily protein
FvH4_1g21770	1.39171	4.02e-05	0.00081083	8.79724	16.908	up		NAD(P)-binding Rossmann-fold superfamily protein
FvH4_2g05630	1.25332	4.08e-05	0.00082049	8.11904	13.9575	up	UGT73B3	UDP-glucosyl transferase 73B3
FvH4_2g32340	1.41669	4.08e-05	0.00082049	4.06937	8.96961	up	ATMYB68,MYB68	myb domain protein 68
FvH4_6g01380	1.10281	4.08e-05	0.00082049	59.9024	109.461	up		GDSL-like Lipase/Acylhydrolase superfamily protein
FvH4_4g09580	1.58275	4.18e-05	0.00083761	3.7681	9.56861	up		RING/U-box superfamily protein
FvH4_6g46530	2.47297	4.22e-05	0.00084522	0.820927	3.84198	up	COB	COBRA-like extracellular glycosyl-phosphatidyl inositol-anchored protein family
FvH4_7g08200	1.27575	4.25e-05	0.00084844	39.3569	76.8827	up		Ribosomal protein L3 family protein
FvH4_6g54460	1.17858	4.42e-05	0.00088	30.4708	56.715	up	GAPA-2	glyceraldehyde 3-phosphate dehydrogenase A subunit 2
FvH4_5g22420	1.28575	4.46e-05	0.00088773	8.03484	15.7875	up		NAD(P)-binding Rossmann-fold superfamily protein
FvH4_4g27500	1.17198	4.6e-05	0.00091283	70.7001	128.07	up	ATXYL1,TRG1,XYL1	alpha-xylosidase 1
FvH4_4g20730	4.01953	4.64e-05	0.00092022	0.112286	2.12915	up	ATGA2OX4,ATGA2OX6,DTA1,GA2OX6	gibberellin 2-oxidase 6
FvH4_5g14970	1.55309	4.65e-05	0.00092133	4.80501	12.0089	up	ATMYB94,ATMYBCP70,MYB94	myb domain protein 94
FvH4_2g16010	1.29709	4.82e-05	0.00095231	24.1066	47.2647	up	CAO,CPSRP43	chloroplast signal recognition particle component (CAO)
FvH4_3g13081	1.30106	4.86e-05	0.00095901	8.40343	17.2424	up		Molybdenum cofactor sulfurase family protein
FvH4_4g04120	1.54499	5.03e-05	0.00098818	15.4341	38.01	up
FvH4_3g37590	1.75152	5.13e-05	0.0010049	0.896908	2.46279	up		Protein of unknown function (DUF674)
FvH4_5g10460	1.03492	5.36e-05	0.00104777	44.0048	74.2159	up	PRPL11	plastid ribosomal protein l11
FvH4_7g08440	1.08383	5.38e-05	0.00105003	2.21124	3.80834	up	ATMRP9,MRP9	multidrug resistance-associated protein 9
FvH4_5g10820	2.52873	5.48e-05	0.00106701	0.58919	2.90744	up
FvH4_3g44800	1.07653	5.6e-05	0.00108847	36.4559	62.4014	up		Disease resistance-responsive (dirigent-like protein) family protein
FvH4_4g23320	1.27063	5.65e-05	0.00109492	9.10819	18.2396	up	ACR4	ACT domain repeat 4
FvH4_6g31711	1.21019	5.66e-05	0.00109552	26.7198	51.9107	up		D-isomer specific 2-hydroxyacid dehydrogenase family protein
FvH4_3g08560	1.00777	5.75e-05	0.00111209	44.3258	75.4	up	APE2,TPT	Glucose-6-phosphate/phosphate translocator-related
FvH4_1g28760	1.18595	5.81e-05	0.00112098	58.6571	107.689	up	HMGA	high mobility group A
FvH4_2g35780	3.43679	6.25e-05	0.00119662	0.57649	3.8525	up
FvH4_6g31740	1.22718	6.29e-05	0.00120281	116.535	218.054	up	PSAH-2,PSAH2,PSI-H	photosystem I subunit H2
FvH4_2g17810	1.14985	6.3e-05	0.00120491	881.861	1556.89	up		Lactoylglutathione lyase / glyoxalase I family protein
FvH4_1g08580	2.40562	6.45e-05	0.00122893	1.03931	4.67684	up		Mob1/phocein family protein
FvH4_3g04260	1.62301	6.54e-05	0.00124466	2.5648	6.36605	up		Protein of unknown function (DUF1191)
FvH4_3g07270	1.11074	6.57e-05	0.00124759	41.7886	73.3992	up	VAT1	VALINE-TOLERANT 1
FvH4_5g10860	1.44483	6.72e-05	0.00127141	4.85531	10.9081	up		glyoxal oxidase-related protein
FvH4_6g34950	1.21039	6.85e-05	0.00129295	5.22859	9.54098	up	CYP75B1,D501,TT7	Cytochrome P450 superfamily protein
FvH4_2g10110	1.21439	6.96e-05	0.00131142	15.2771	28.6142	up		RNA-binding CRS1 / YhbY (CRM) domain protein
FvH4_1g10910	2.20535	6.98e-05	0.00131457	7.96081	27.0751	up		SEC14 cytosolic factor family protein / phosphoglyceride transfer family protein
FvH4_6g43020	1.78921	7.05e-05	0.00132685	4.24861	12.5855	up	SIP1;2,SIP1B	Aquaporin-like superfamily protein
FvH4_6g36940	1.499	7.18e-05	0.00134824	4.57866	10.149	up
FvH4_1g08531	2.21104	7.33e-05	0.00137417	5.75652	22.3517	up	ATGER3,GER3,GLP3,GLP3A,GLP3B	germin 3
FvH4_1g12210	3.77526	7.42e-05	0.00139	0.255835	2.09529	up	CYP84A1,FAH1	ferulic acid 5-hydroxylase 1
FvH4_7g30000	1.17343	7.55e-05	0.00141436	220.218	402.575	up	DCR,EMB3009,PEL3	HXXXD-type acyl-transferase family protein
FvH4_2g16020	1.14594	7.57e-05	0.00141635	10.8199	20.9784	up
FvH4_6g40590	1.09983	7.61e-05	0.00141979	20.7788	37.1332	up	FLA2	FASCICLIN-like arabinogalactan 2
FvH4_6g12110	3.65777	7.73e-05	0.0014379	1.74783	4.24231	up
FvH4_4g25830	1.11306	7.87e-05	0.00145881	22.441	40.4521	up		alpha/beta-Hydrolases superfamily protein
FvH4_6g13710	1.6634	8.01e-05	0.00147941	2775.01	6739.64	up
FvH4_7g13860	1.30558	8.27e-05	0.00152236	35.4664	71.0001	up		Remorin family protein
FvH4_1g14790	1.34739	8.29e-05	0.00152431	179.432	358.062	up	OBP1	OBF binding protein 1
FvH4_1g28480	1.08808	8.36e-05	0.00153217	90.4748	155.839	up		HSP20-like chaperones superfamily protein
FvH4_3g00420	1.42883	8.78e-05	0.00159944	29.8984	74.6341	up		Heavy metal transport/detoxification superfamily protein
FvH4_4g00500	1.06972	8.8e-05	0.00160149	54.4341	94.537	up
FvH4_4g34130	1.2199	8.83e-05	0.00160471	15.4377	29.271	up	DHNS,ECHID	enoyl-CoA hydratase/isomerase D
FvH4_6g10590	1.53262	8.89e-05	0.00161163	2.03307	5.25995	up
FvH4_6g08960	1.47411	9.19e-05	0.00165774	5.45716	12.6162	up		Tetratricopeptide repeat (TPR)-like superfamily protein
FvH4_4g22190	1.97883	9.3e-05	0.00167465	5.25382	16.4966	up
FvH4_2g32820	2.02884	9.68e-05	0.00173671	1.00745	3.4923	up		alpha/beta-Hydrolases superfamily protein
FvH4_6g08640	1.51739	9.95e-05	0.00178267	6.95365	17.4709	up		Pectinacetylesterase family protein
FvH4_4g22500	1.29357	0.0001031	0.00183999	25.4869	49.4073	up		transferases, transferring glycosyl groups
FvH4_3g16140	1.06031	0.00010505	0.00187161	10.3223	17.7814	up		ankyrin repeat family protein
FvH4_4g27090	2.07559	0.00010674	0.00189849	1.79757	5.89711	up	AtMYB62,BW62B,BW62C,MYB62	myb domain protein 62
FvH4_6g05450	1.38851	0.00010726	0.00190609	11.5526	24.014	up	ATL6	RING/U-box superfamily protein
FvH4_5g17760	1.21564	0.00010804	0.00191498	37.2085	68.3873	up		Protein of unknown function (DUF760)
FvH4_7g23661	1.76887	0.00010883	0.00192735	1.90483	5.16846	up		UDP-Glycosyltransferase superfamily protein
FvH4_1g12582	3.4894	0.00011035	0.00195274	14.193	116.433	up	ERD10,LTI29,LTI45	Dehydrin family protein
FvH4_5g02740	1.36872	0.00011067	0.00195661	1.90351	4.51513	up		Disease resistance protein (TIR-NBS class)
FvH4_4g35980	1.05472	0.00011106	0.00195854	8.04853	14.6553	up		Homeodomain-like superfamily protein
FvH4_6g38370	3.47463	0.00011371	0.00200144	0.129625	1.31486	up	ATWRKY28,WRKY28	WRKY DNA-binding protein 28
FvH4_6g33980	1.66166	0.00011665	0.00204851	14.4207	36.8953	up
FvH4_5g32100	2.61545	0.00011681	0.0020496	2.96132	13.1882	up
FvH4_1g13820	2.11808	0.0001181	0.00206869	0.774594	2.091	up		F-box family protein
FvH4_3g00600	4.04569	0.00011933	0.0020868	0.278211	2.85882	up
FvH4_2g24330	1.32921	0.00012032	0.00210069	11.0109	22.7042	up		Leucine-rich repeat (LRR) family protein
FvH4_1g19310	1.15502	0.00012048	0.00210165	11.4515	20.6805	up		Dof-type zinc finger DNA-binding family protein
FvH4_2g34930	1.84989	0.00012118	0.00211032	1.82178	6.0247	up		Protein of unknown function, DUF547
FvH4_5g32500	1.10673	0.00012332	0.00214226	5.16745	9.18742	up		C2 calcium/lipid-binding plant phosphoribosyltransferase family protein
FvH4_6g45210	1.14458	0.00012496	0.00216533	46.7374	83.0886	up		Ribosomal protein PSRP-3/Ycf65
FvH4_4g13980	1.44365	0.00012653	0.00218901	5.15287	11.2148	up	BUD2,SAMDC4	Adenosylmethionine decarboxylase family protein
FvH4_1g08270	1.48706	0.00012693	0.00219397	57.2563	121.312	up	PSBX	photosystem II subunit X
FvH4_1g20790	1.31464	0.00012856	0.00221854	108.835	215.195	up
FvH4_2g20170	1.21014	0.00012884	0.00222157	41.4258	76.4178	up		C2 calcium/lipid-binding plant phosphoribosyltransferase family protein
FvH4_4g09760	3.55392	0.00012985	0.00223718	0.51648	3.70139	up
FvH4_4g25560	1.1188	0.00013076	0.00224967	5.26315	9.4874	up	ORF02,PHT2;1	phosphate transporter 2;1
FvH4_1g14650	1.16106	0.00013323	0.00228776	5.88651	11.3692	up	REM39,VRN1	AP2/B3-like transcriptional factor family protein
FvH4_4g36190	1.66208	0.00013409	0.00229874	7.68124	22.2101	up
FvH4_7g06770	1.24347	0.00013467	0.00230681	42.0125	78.6623	up	AHAS,ALS,CSR1,IMR1,TZP5	chlorsulfuron/imidazolinone resistant 1
FvH4_6g47150	1.03184	0.00013562	0.00232119	37.8343	63.7435	up		Protein of unknown function (DUF295)
FvH4_5g09300	1.36236	0.00013628	0.00233056	44.4113	89.1271	up	ATICE1,ICE1,SCRM	basic helix-loop-helix (bHLH) DNA-binding superfamily protein
FvH4_7g04770	1.18864	0.00013647	0.0023319	22.5719	41.4111	up	UBP13	ubiquitin-specific protease 13
FvH4_7g00120	2.57836	0.00013798	0.0023519	0.886063	3.99758	up		Cysteine/Histidine-rich C1 domain family protein
FvH4_1g16950	1.79007	0.00013995	0.00237585	1.24754	3.55353	up		Tetratricopeptide repeat (TPR)-like superfamily protein
FvH4_5g15920	1.00786	0.00013972	0.00237585	14.6846	24.8833	up		Dynein light chain type 1 family protein
FvH4_1g04950	4.22433	0.00014242	0.00241193	0.572988	6.70271	up
FvH4_1g07920	1.05376	0.00014234	0.00241193	104.15	176	up	EIF4A-2	eif4a-2
FvH4_3g06600	1.41911	0.0001437	0.00242963	8.08164	17.2999	up
FvH4_6g51480	1.69889	0.00014444	0.00244023	5.60312	14.8494	up
FvH4_4g19370	2.46927	0.00014666	0.00247169	0.958762	4.76324	up	ATCTL2,CTL2	chitinase-like protein 2
FvH4_6g00530	1.19018	0.00014781	0.0024871	207.828	380.482	up	PSAL	photosystem I subunit l
FvH4_5g36400	2.32289	0.00015453	0.00258764	2.47932	10.9639	up		Cupredoxin superfamily protein
FvH4_4g32251	2.23227	0.00015544	0.00260073	1.25807	5.25228	up		Heavy metal transport/detoxification superfamily protein
FvH4_1g01710	1.28725	0.00015649	0.0026162	5.3331	10.6929	up		Cyclophilin-like peptidyl-prolyl cis-trans isomerase family protein
FvH4_5g26710	1.88966	0.00015723	0.00262365	0.77688	2.04467	up		Protein kinase superfamily protein
FvH4_6g27680	1.30351	0.0001631	0.00271167	2.22461	4.80715	up	NDF2,NDH45	NDH-dependent cyclic electron flow 1
FvH4_6g31770	1.10119	0.00016432	0.00272975	153.954	264.207	up	CS17,PRPS17,RPS17	ribosomal protein S17
FvH4_2g35620	1.28938	0.0001684	0.00278414	17.4707	34.1856	up	TINY2	Integrase-type DNA-binding superfamily protein
FvH4_6g19990	1.29244	0.00017207	0.00283445	10.9571	21.4595	up		Mitochondrial transcription termination factor family protein
FvH4_6g38230	1.17247	0.00017212	0.00283445	59.2693	107.208	up	HLH1,PAR1	phy rapidly regulated 1
FvH4_2g10390	1.11574	0.00017492	0.00287154	23.2515	41.0594	up	FBA2	fructose-bisphosphate aldolase 2
FvH4_7g20910	1.39385	0.00018212	0.00298039	2.42588	5.78487	up	KCS19	3-ketoacyl-CoA synthase 19
FvH4_2g19540	1.38833	0.00018283	0.00298813	2.2516	5.12223	up		Pectin lyase-like superfamily protein
FvH4_1g16930	1.83657	0.00018405	0.00300487	2.21601	6.46637	up	CYP81D8	cytochrome P450, family 81, subfamily D, polypeptide 8
FvH4_5g39190	1.37026	0.00018551	0.00302631	147.687	298.567	up	CP12,CP12-2	CP12 domain-containing protein 2
FvH4_3g19430	1.02354	0.00018669	0.00303611	66.8908	110.738	up		chloroplast 30S ribosomal protein S20, putative
FvH4_6g31721	1.20863	0.00018794	0.00305178	26.7774	50.753	up		D-isomer specific 2-hydroxyacid dehydrogenase family protein
FvH4_7g21290	2.26858	0.00018977	0.00307435	1.11426	3.9035	up		Protein of unknown function (DUF674)
FvH4_5g13740	1.128	0.00019264	0.00311108	14.5056	25.9038	up		Protein of unknown function (DUF1118)
FvH4_1g07230	1.22095	0.00019346	0.00312198	13.8742	26.2801	up	AT-CDA1,CDA1,DESZ	cytidine deaminase 1
FvH4_7g26010	2.80514	0.00019934	0.00320701	0.419722	1.68486	up		Lung seven transmembrane receptor family protein
FvH4_3g40570	1.59887	0.00020183	0.00323953	4.59615	11.2915	up	ATC4H,C4H,CYP73A5,REF3	cinnamate-4-hydroxylase
FvH4_2g23081	1.17637	0.00020304	0.00324694	3.41453	6.55163	up		2-oxoglutarate (2OG) and Fe(II)-dependent oxygenase superfamily protein
FvH4_6g03680	1.20787	0.00020482	0.00326744	14.4341	27.276	up		Rubredoxin-like superfamily protein
FvH4_3g08970	1.09293	0.00021203	0.00337468	59.7014	103.089	up		Ribosomal protein S5 family protein
FvH4_2g12420	1.09994	0.00021344	0.00339464	19.3788	33.2997	up		GDSL-like Lipase/Acylhydrolase superfamily protein
FvH4_1g08010	1.32382	0.00021363	0.00339497	2.73047	5.6766	up	HAB1	homology to ABI1
FvH4_3g34020	2.70612	0.00021837	0.00345465	4.25711	17.8778	up
FvH4_7g24410	1.02421	0.00021874	0.00345739	28.5162	47.2304	up		SGNH hydrolase-type esterase superfamily protein
FvH4_6g53700	1.03634	0.00022446	0.00352955	10.6135	18.0919	up		Major facilitator superfamily protein
FvH4_3g23500	1.36209	0.00022791	0.00357577	5.65833	11.9181	up		SWIB/MDM2 domain superfamily protein
FvH4_2g39640	1.54321	0.00023031	0.00360251	4.38447	9.94489	up	AtTLP6,TLP6	tubby like protein 6
FvH4_5g31080	2.84897	0.00023108	0.00361194	0.597177	3.50494	up		Tetratricopeptide repeat (TPR)-like superfamily protein
FvH4_5g25960	1.31215	0.00023378	0.0036514	29.3229	58.5192	up	ANAC031,CUC3,NAC368	NAC (No Apical Meristem) domain transcriptional regulator superfamily protein
FvH4_3g06210	1.44914	0.00023704	0.00368582	2.57535	5.38992	up	ATKCO6,ATTPK3,KCO6,TPK3	Ca2+ activated outward rectifying K+ channel 6
FvH4_4g03560	2.40144	0.00024363	0.00377375	0.606154	3.05557	up	ATPPCK1,PPCK1	phosphoenolpyruvate carboxylase kinase 1
FvH4_3g02310	1.07172	0.0002489	0.00384152	14.1203	23.9785	up		DNA binding
FvH4_3g07980	1.04069	0.00025034	0.00385948	72.0799	120.618	up		Ribosomal protein L34
FvH4_5g12860	2.57336	0.00025043	0.00385948	0.846583	4.1815	up	AtENODL5,ENODL5	early nodulin-like protein 5
FvH4_7g01310	1.56739	0.00025834	0.00397257	1.71648	4.53578	up		HXXXD-type acyl-transferase family protein
FvH4_3g02060	1.08033	0.00025969	0.00399046	9.44302	16.3925	up	ATPC1	ATPase, F1 complex, gamma subunit protein
FvH4_7g00200	1.69756	0.00026153	0.00401288	0.897265	2.79061	up	RLK1	receptor-like protein kinase 1
FvH4_4g34960	1.37454	0.00026322	0.00403582	6.2684	12.2558	up
FvH4_3g13390	1.07443	0.00026354	0.00403775	12.379	21.3584	up		S-adenosyl-L-methionine-dependent methyltransferases superfamily protein
FvH4_3g18910	1.09833	0.00026386	0.00403963	4.71867	8.56025	up	CPR30	F-box and associated interaction domains-containing protein
FvH4_3g08341	1.3807	0.00026779	0.00409081	3.05946	5.90052	up		UDP-Glycosyltransferase superfamily protein
FvH4_4g09850	1.29351	0.00026876	0.00410265	2.73221	5.87679	up		F-box family protein
FvH4_3g04270	1.44701	0.00027164	0.00413755	1.75734	4.31944	up	BUM,BUM1,SHL,STM,WAM,WAM1	KNOX/ELK homeobox transcription factor
FvH4_3g02690	1.5675	0.00027221	0.00414324	2.54229	5.87855	up
FvH4_1g11510	1.25301	0.00027281	0.00414909	45.4685	87.2946	up
FvH4_5g10770	1.44795	0.0002737	0.00415378	2.87826	6.76452	up	BLT	branchless trichome
FvH4_7g33550	1.0571	0.00027358	0.00415378	8.77174	14.9468	up	ENH1	rubredoxin family protein
FvH4_2g27700	1.06371	0.00027928	0.0042262	7.80402	9.81953	up		Protein kinase superfamily protein
FvH4_1g12360	1.16651	0.00028308	0.00427438	48.0851	88.4845	up	ATTRX,H1,ATTRX1,TRX1	thioredoxin H-type 1
FvH4_1g05820	1.34252	0.00028661	0.00431522	14.717	29.5607	up	TINY2	Integrase-type DNA-binding superfamily protein
FvH4_3g26010	5.78121	0.00028831	0.00433769	0.0384542	1.64043	up	HEL,PR-4,PR4	pathogenesis-related 4
FvH4_3g01820	1.03355	0.00029293	0.0043972	102.444	169.433	up		Glycine cleavage T-protein family
FvH4_3g21230	2.12626	0.00029605	0.00443184	1.79075	6.48296	up		B-box type zinc finger family protein
FvH4_5g38990	1.01778	0.00030181	0.00449875	27.3072	44.7104	up		Protein of unknown function (DUF1644)
FvH4_4g29400	1.22913	0.00030368	0.00452009	3.48441	7.24728	up	BAS1,CYP72B1,CYP734A1	Cytochrome P450 superfamily protein
FvH4_1g08910	5.16873	0.00030744	0.00455989	0.323034	6.41946	up	ATSSL4,SSL4	strictosidine synthase-like 4
FvH4_3g19330	1.3317	0.00030725	0.00455989	4.9741	10.1143	up		D-aminoacid aminotransferase-like PLP-dependent enzymes superfamily protein
FvH4_2g09801	2.0226	0.00031212	0.00461612	2.3714	8.13057	up		Aminotransferase-like, plant mobile domain family protein
FvH4_6g43860	1.34517	0.00031798	0.00469625	940.907	1860.6	up	XTH9	xyloglucan endotransglucosylase/hydrolase 9
FvH4_7g12500	1.54959	0.00031894	0.00470707	12.4414	27.9168	up		alpha/beta-Hydrolases superfamily protein
FvH4_7g02730	2.7656	0.00032021	0.00472244	0.434137	2.44759	up	ACD1-LIKE,PTC52,TIC55-IV	ACD1-like
FvH4_1g01020	1.38773	0.00032298	0.00475943	3.83004	7.97289	up		BTB/POZ domain with WD40/YVTN repeat-like protein
FvH4_6g16250	1.13582	0.00032317	0.00475943	3.13844	6.03948	up		UDP-Glycosyltransferase superfamily protein
FvH4_2g28950	1.12543	0.00032779	0.00481386	27.7973	48.7423	up		Protein kinase superfamily protein
FvH4_5g13400	1.93435	0.00033041	0.00483881	1.0394	3.49797	up		18S pre-ribosomal assembly protein gar2-related
FvH4_4g24410	1.40577	0.00033233	0.00485877	14.4293	30.0183	up		Ankyrin repeat family protein
FvH4_3g19800	1.19553	0.00033879	0.00493731	4.99573	9.7689	up		VQ motif-containing protein
FvH4_1g06841	1.16196	0.00033998	0.00495121	7.4513	13.9944	up		S-adenosyl-L-methionine-dependent methyltransferases superfamily protein
FvH4_2g33471	1.6697	0.00034138	0.00496514	1.76772	4.41784	up	CYP81D3	cytochrome P450, family 81, subfamily D, polypeptide 3
FvH4_1g16370	1.7736	0.00034834	0.00503426	4.37276	11.8699	up	DEAR2	DREB and EAR motif protein 2
FvH4_7g01450	1.09699	0.00035612	0.00512894	3.69761	6.62602	up	APAO,ATPAO1,PAO1	polyamine oxidase 1
FvH4_7g01760	4.50796	0.00036668	0.00524849	0.0305495	0.556318	up	scpl40	serine carboxypeptidase-like 40
FvH4_5g31070	1.50925	0.00037027	0.00529267	3.10917	7.53208	up		Tetratricopeptide repeat (TPR)-like superfamily protein
FvH4_3g41570	1.41388	0.00037105	0.00530018	7.45346	15.7966	up	PRA1.G2	prenylated RAB acceptor 1.G2
FvH4_5g18920	1.16535	0.00038576	0.00547663	20.7879	37.1447	up
FvH4_1g07650	1.14749	0.00039146	0.00554244	5.91226	10.9007	up		alpha/beta-Hydrolases superfamily protein
FvH4_4g35270	1.67935	0.00039785	0.00562911	0.764959	2.06121	up		Amino acid permease family protein
FvH4_7g10550	1.30077	0.00039956	0.00564949	29.46	59.1911	up
FvH4_7g28500	1.23434	0.0004032	0.00568696	8.30674	15.558	up	CER6,CUT1,G2,KCS6,POP1	3-ketoacyl-CoA synthase 6
FvH4_6g19360	1.73527	0.00040583	0.00571495	2.2906	6.26555	up
FvH4_2g16680	1.04049	0.00041504	0.0058211	8.2518	14.1855	up		Protein kinase superfamily protein
FvH4_5g33610	1.4103	0.00041576	0.0058234	5.85874	11.935	up	TUA6	Tubulin/FtsZ family protein
FvH4_7g28320	1.41851	0.00043289	0.00603096	17.9387	38.4242	up		2 iron, 2 sulfur cluster binding
FvH4_6g08870	1.11719	0.00043546	0.00605075	3.90939	6.92545	up		Tetratricopeptide repeat (TPR)-like superfamily protein
FvH4_6g27330	1.15439	0.00043542	0.00605075	3.77442	7.20348	up	ATFMN/FHY,FMN/FHY	riboflavin kinase/FMN hydrolase
FvH4_7g05050	1.42366	0.00043639	0.00605227	4.4702	9.0693	up	CAT7	cationic amino acid transporter 7
FvH4_7g12120	1.14445	0.00043746	0.00606241	166.578	294.124	up	FLA10	FASCICLIN-like arabinogalactan-protein 10
FvH4_1g18170	4.78742	0.00043813	0.00606762	0.110687	2.60678	up	ATGER3,GER3,GLP3,GLP3A,GLP3B	germin 3
FvH4_5g06903	1.51623	0.00044395	0.00613604	4.944	12.5765	up
FvH4_4g09780	1.67792	0.0004463	0.0061604	6.0337	14.6534	up	ATTPS11,ATTPSB,TPS11	trehalose phosphatase/synthase 11
FvH4_6g38780	1.01512	0.00044699	0.00616574	23.2762	40.0935	up	PSY	PHYTOENE SYNTHASE
FvH4_3g31870	1.60463	0.00045098	0.00620857	9.09886	20.7641	up	ATLOG1,LOG1	Putative lysine decarboxylase family protein
FvH4_6g06380	1.46387	0.0004637	0.00632946	21.1038	51.2303	up	ATRL1,RL1,RSM2	RAD-like 1
FvH4_3g17160	1.14357	0.00046755	0.00637782	10.1845	18.6173	up		F-box/RNI-like superfamily protein
FvH4_7g07030	1.11742	0.00046888	0.00638764	10.1843	17.622	up		glycosyltransferase family protein 47
FvH4_2g05060	1.08536	0.00047483	0.00646453	3.8551	7.09273	up	UGT84A1	UDP-Glycosyltransferase superfamily protein
FvH4_2g34430	1.6074	0.00047641	0.0064818	2.19786	5.35074	up		Thioredoxin superfamily protein
FvH4_2g09802	1.74726	0.00047862	0.00649067	3.49588	8.91337	up
FvH4_6g05350	1.2382	0.00047861	0.00649067	3.55747	7.54317	up		D-aminoacid aminotransferase-like PLP-dependent enzymes superfamily protein
FvH4_2g09900	1.68903	0.00048162	0.00652722	5.67736	13.9049	up
FvH4_2g21340	1.04712	0.00048871	0.00660186	42.8268	72.769	up		Ribosomal protein L10 family protein
FvH4_7g15500	1.19686	0.0004878	0.00660186	15.9565	29.0361	up		RING/U-box superfamily protein
FvH4_2g18350	1.39905	0.00049379	0.00664898	3.709	8.06121	up		Oxidoreductase, zinc-binding dehydrogenase family protein
FvH4_2g12510	1.31113	0.00049469	0.00665259	5.07058	10.1127	up		HXXXD-type acyl-transferase family protein
FvH4_1g02310	1.13861	0.00049965	0.00669677	328.83	568.3	up
FvH4_5g15121	1.2075	0.00050717	0.00677243	8.40682	15.5458	up	ATGSTU10,GSTU10	glutathione S-transferase TAU 10
FvH4_3g13300	1.01442	0.000509	0.00679118	8.10312	14.0885	up		DNA glycosylase superfamily protein
FvH4_7g04010	2.32282	0.00051104	0.00681111	0.749994	3.03159	up		RING/U-box superfamily protein
FvH4_4g26830	1.54512	0.0005393	0.00714665	1.04956	2.49495	up		Protein kinase superfamily protein
FvH4_4g13670	1.52564	0.00054078	0.00715721	5.3598	12.1941	up		GC-rich sequence DNA-binding factor-like protein with Tuftelin interacting domain
FvH4_4g26071	1.3842	0.00054395	0.00718094	1.87589	3.44742	up	CRK2	cysteine-rich RLK (RECEPTOR-like protein kinase) 2
FvH4_6g33130	1.09806	0.00055109	0.00725233	22.7181	40.0526	up	PRA1.F2,PRA7	PRA1 (Prenylated rab acceptor) family protein
FvH4_7g20420	1.22808	0.00055765	0.00731567	10.6789	20.2908	up	ATSUMO2,SUM2,SUMO,2,SUMO2	small ubiquitin-like modifier 2
FvH4_5g35360	5.53826	0.0005648	0.00739056	0.0292412	1.86505	up
FvH4_3g32470	1.02874	0.00056953	0.00744342	16.2635	26.9899	up		DHBP synthase RibB-like alpha/beta domain
FvH4_1g01970	1.10697	0.00057806	0.00753603	20.3663	37.2406	up
FvH4_6g17760	1.05149	0.00059008	0.00767835	64.5246	109.609	up		Thioredoxin superfamily protein
FvH4_1g23790	1.00974	0.00059187	0.00769215	285.884	463.115	up	ATCAD9,CAD9	cinnamyl alcohol dehydrogenase 9
FvH4_6g19330	1.21479	0.00059406	0.00771423	3.85624	7.53038	up		chaperone protein dnaJ-related
FvH4_7g19800	1.32836	0.00059882	0.00773632	4.41605	8.87712	up	TET6	tetraspanin6
FvH4_2g32550	1.72605	0.00059986	0.00773892	1.28307	3.34509	up		Transmembrane amino acid transporter family protein
FvH4_7g22270	1.55991	0.00060029	0.00773892	2.78377	6.77177	up	AT-HSC70-1,HSC70,HSC70-1,HSP70-1	heat shock cognate protein 70-1
FvH4_2g05690	1.1245	0.0006032	0.00776684	7.56478	13.6063	up	UGT73B5	UDP-glucosyl transferase 73B5
FvH4_7g03220	2.16408	0.00060871	0.00783307	1.39282	5.47257	up	NQR	NADPH:quinone oxidoreductase
FvH4_6g14860	1.60778	0.0006094	0.00783705	0.770359	1.94229	up
FvH4_3g21460	1.10737	0.00061344	0.00787932	117.835	200.768	up	DFL1,GH3.6	Auxin-responsive GH3 family protein
FvH4_3g28510	1.13678	0.00061438	0.00788654	12.1279	21.5127	up	ATNADK-1,NADK1	NAD kinase 1
FvH4_6g09470	1.08643	0.00061476	0.00788663	2.66971	5.26362	up		Leucine-rich repeat protein kinase family protein
FvH4_5g15500	1.18768	0.00062773	0.00802339	7.19553	13.4404	up		Protein of unknown function (DUF1118)
FvH4_1g14000	1.9215	0.00062851	0.00802363	1.27832	4.01206	up		UDP-Glycosyltransferase superfamily protein
FvH4_7g19310	1.43447	0.00064491	0.00819292	2.19193	4.73502	up		Phototropic-responsive NPH3 family protein
FvH4_4g16720	5.25299	0.00064629	0.00820544	0.0555873	1.72253	up	AtDMP2,DMP2	DUF679 domain membrane protein 2
FvH4_7g11180	3.21472	0.0006522	0.00827038	0.498908	3.54782	up		Bifunctional inhibitor/lipid-transfer protein/seed storage 2S albumin superfamily protein
FvH4_6g27760	1.15097	0.00066167	0.00837533	2.07419	4.16226	up	ATTPS7,ATTPSA,TPS7	trehalose-phosphatase/synthase 7
FvH4_5g01430	1.31118	0.00067226	0.00847336	2.04613	4.47194	up
FvH4_6g28000	1.19721	0.0006782	0.00853279	10.7232	20.8841	up
FvH4_7g25360	1.04136	0.00070177	0.00879228	60.8922	100.974	up	PRA1.B4	prenylated RAB acceptor 1.B4
FvH4_4g15080	1.12841	0.00070383	0.00881096	7.81636	14.283	up
FvH4_7g19790	1.04116	0.00070452	0.00881096	3.39066	5.96068	up	ATMLO6,MLO6	Seven transmembrane MLO family protein
FvH4_2g41250	1.887	0.00070562	0.00881943	22.2903	38.6955	up	AtMAPR2,MAPR2	membrane-associated progesterone binding protein 2
FvH4_3g45300	1.28637	0.00070745	0.00883172	9.3802	16.7969	up		Galactose oxidase/kelch repeat superfamily protein
FvH4_4g31070	4.34147	0.00071312	0.00888403	2.46634	36.4672	up	ANAC029,ATNAP,NAP	NAC-like, activated by AP3/PI
FvH4_2g38460	1.62965	0.00071606	0.00890727	1.55387	3.8523	up
FvH4_4g23520	1.16269	0.00072765	0.00902459	5.53583	11.3581	up		Squamosa promoter-binding protein-like (SBP domain) transcription factor family protein
FvH4_2g00900	2.88917	0.0007591	0.00935905	0.133517	0.84081	up		P-loop containing nucleoside triphosphate hydrolases superfamily protein
FvH4_5g38291	1.28392	0.0007587	0.00935905	1.93852	3.91528	up		Pentatricopeptide repeat (PPR) superfamily protein
FvH4_4g25840	5.42507	0.00077203	0.0094794	0.060369	1.80389	up	CRK3	cysteine-rich RLK (RECEPTOR-like protein kinase) 3
FvH4_1g00500	1.16551	0.00077529	0.00950265	10.296	19.9153	up
FvH4_2g06670	1.1499	0.00078487	0.00960879	4.4182	8.08156	up		Protein of unknown function (DUF1645)
FvH4_6g19870	1.04319	0.00078616	0.00961426	15.0258	25.2686	up	ATOFP13,OFP13	ovate family protein 13
FvH4_6g28790	1.20706	0.00078683	0.00961586	17.3892	28.5822	up	NIP6,NIP6;1,NLM7	NOD26-like intrinsic protein 6;1
FvH4_4g15260	1.14682	0.00079532	0.00969577	65.0623	114.913	up	PSAD-2	photosystem I subunit D-2
FvH4_4g33740	1.30039	0.00081083	0.00982057	5.61883	10.3329	up		2-oxoglutarate (2OG) and Fe(II)-dependent oxygenase superfamily protein
FvH4_2g12490	1.05622	0.00081858	0.00989396	28.3633	47.3054	up	ATPD	ATP synthase delta-subunit gene
FvH4_1g11940	1.04487	0.00082576	0.00996928	18.723	31.1599	up
FvH4_5g23940	1.507	0.000847	0.0101962	4.50925	10.2527	up
FvH4_1g28620	1.25037	0.00085198	0.0102503	1.47066	2.93301	up		Tetratricopeptide repeat (TPR)-like superfamily protein
FvH4_1g04130	1.20406	0.00087351	0.0104671	2.85461	5.98625	up		Homeodomain-like superfamily protein
FvH4_6g34310	1.6676	0.0008981	0.0107187	5.17078	12.7777	up		Mitochondrial substrate carrier family protein
FvH4_3g09050	1.41044	0.0008997	0.0107317	5.1385	11.9432	up		basic helix-loop-helix (bHLH) DNA-binding superfamily protein
FvH4_1g28660	1.13023	0.00090575	0.0107916	10.466	18.7058	up		Mog1/PsbP/DUF1795-like photosystem II reaction center PsbP family protein
FvH4_7g27010	1.04876	0.00090954	0.0108244	9.20317	16.4368	up		HAD superfamily, subfamily IIIB acid phosphatase
FvH4_4g19050	1.51996	0.00091441	0.0108576	16.6498	39.7326	up	MLP423	MLP-like protein 423
FvH4_6g22390	1.43709	0.00093476	0.0110607	3.92883	8.71436	up		VQ motif-containing protein
FvH4_2g02912	3.74178	0.00096762	0.011374	0.201146	2.27808	up	ATPRB1,PRB1	basic pathogenesis-related protein 1
FvH4_3g00950	1.01157	0.00096865	0.0113788	46.8741	76.3363	up		SWIB complex BAF60b domain-containing protein
FvH4_5g34840	2.79336	0.00097648	0.0114514	0.370066	2.31558	up	CER2,VC-2,VC2	HXXXD-type acyl-transferase family protein
FvH4_3g28710	1.30081	0.00099234	0.0116049	165.479	315.149	up		Photosystem II 5 kD protein
FvH4_3g39990	1.58492	0.00100432	0.01171	2.29278	5.79339	up		F-box family protein
FvH4_7g32420	1.07557	0.00100525	0.01171	5.81269	11.5025	up		Rhodanese/Cell cycle control phosphatase superfamily protein
FvH4_3g44681	1.14556	0.0010285	0.0119211	5.93228	10.6521	up	EDA3	DnaJ/Hsp40 cysteine-rich domain superfamily protein
FvH4_6g43030	1.80742	0.00103107	0.0119376	2.0722	6.56816	up	SIP1;2,SIP1B	Aquaporin-like superfamily protein
FvH4_4g00310	1.25535	0.00103758	0.011993	99.9722	183.345	up	KAT2,PED1,PKT3	peroxisomal 3-ketoacyl-CoA thiolase 3
FvH4_1g14370	1.20475	0.00104001	0.0120145	23.7334	43.1206	up		CAP (Cysteine-rich secretory proteins, Antigen 5, and Pathogenesis-related 1 protein) superfamily protein
FvH4_2g39180	1.08152	0.00104604	0.0120774	24.8006	42.7756	up		ATP-dependent protease La (LON) domain protein
FvH4_5g15000	4.93412	0.00105529	0.0121462	0.629227	13.7215	up	ATGSTU9,GST14,GST14B,GSTU9	glutathione S-transferase tau 9
FvH4_6g08370	2.31689	0.00105966	0.0121809	0.448227	1.95894	up	AtSAM1,MAT1,SAM-1,SAM1	S-adenosylmethionine synthetase 1
FvH4_3g37210	1.77351	0.00108072	0.0123617	4.59605	11.7433	up	MEE60	maternal effect embryo arrest 60
FvH4_6g45410	1.8502	0.00108815	0.0124263	0.861541	2.86904	up	TCP1	TCP family transcription factor
FvH4_4g13000	1.55685	0.0011202	0.0127169	2.50212	5.6859	up	IAGLU	indole-3-acetate beta-D-glucosyltransferase
FvH4_6g08191	1.18892	0.00112481	0.0127612	3.55484	6.74782	up		Eukaryotic aspartyl protease family protein
FvH4_4g23540	1.61341	0.00112601	0.012768	24.4658	56.0503	up
FvH4_2g40660	1.30763	0.00113854	0.0128891	44.7464	86.368	up		Dof-type zinc finger DNA-binding family protein
FvH4_2g31210	1.25303	0.0011481	0.0129692	154.299	288.477	up	PSBX	photosystem II subunit X
FvH4_5g28820	1.14603	0.00116167	0.0130871	251.328	434.597	up	ATFD2,FED,A	2Fe-2S ferredoxin-like superfamily protein
FvH4_7g26240	1.37777	0.00116656	0.0131351	64.1614	127.814	up	RPL10B	Ribosomal protein L16p/L10e family protein
FvH4_2g26970	1.29351	0.00117918	0.0132487	11.6698	25.8189	up	NPQ4,PSBS	Chlorophyll A-B binding family protein
FvH4_6g12780	1.1971	0.00118532	0.0133033	8.94978	15.5988	up		glyoxal oxidase-related protein
FvH4_2g30090	1.34121	0.00118732	0.0133186	6.2354	12.4555	up		2Fe-2S ferredoxin-like superfamily protein
FvH4_6g10340	1.07123	0.00120413	0.0134515	4.43553	7.42248	up		Pentatricopeptide repeat (PPR) superfamily protein
FvH4_5g21290	1.33473	0.00123037	0.0137132	186.027	364.912	up
FvH4_3g29120	1.03271	0.00123578	0.0137589	91.34	149.866	up	FLA1	FASCICLIN-like arabinogalactan 1
FvH4_4g23880	1.71298	0.00125668	0.013945	2.46167	7.35494	up	CCOAMT	caffeoyl-CoA 3-O-methyltransferase
FvH4_3g21940	1.0793	0.0012966	0.0142804	289.118	481.945	up	THI1,THI4,TZ	thiazole biosynthetic enzyme, chloroplast (ARA6) (THI1) (THI4)
FvH4_3g20540	1.07969	0.00130012	0.0142849	5.80721	10.249	up		CBS domain-containing protein
FvH4_6g35020	1.26567	0.00130373	0.014317	6.74157	13.7541	up		Protein of unknown function (DUF1677)
FvH4_6g13180	2.57791	0.00130893	0.0143515	1.22444	2.52678	up		Concanavalin A-like lectin protein kinase family protein
FvH4_6g11540	1.02176	0.00132741	0.0144796	120.148	194.645	up	LHCB4.2	light harvesting complex photosystem II
FvH4_2g28650	1.48326	0.00134613	0.0146517	0.377884	0.862886	up	TPR1	TOPLESS-related 1
FvH4_3g38120	1.00152	0.00135941	0.0147426	27.166	43.9649	up	ATPTR1,PTR1	peptide transporter 1
FvH4_6g38670	1.21995	0.00136746	0.0148068	26.578	48.8244	up	HPD,PDS1	phytoene desaturation 1
FvH4_4g04650	1.06765	0.00138241	0.0149223	20.7151	34.4331	up		RNA-binding (RRM/RBD/RNP motifs) family protein
FvH4_2g23070	1.07333	0.00141393	0.0151841	5.48364	9.01113	up		Bax inhibitor-1 family protein
FvH4_1g20360	1.10085	0.00141785	0.0151955	7.30948	12.6245	up		Peroxidase superfamily protein
FvH4_5g06740	1.53495	0.0014179	0.0151955	11.4354	24.915	up	BT1	BTB and TAZ domain protein 1
FvH4_2g23570	1.01882	0.00142469	0.0152527	4.15643	6.85983	up	CSP41A	chloroplast stem-loop binding protein of 41 kDa
FvH4_3g04630	2.78303	0.0014304	0.0152903	0.309162	1.82051	up	anac025,NAC025	NAC domain containing protein 25
FvH4_6g42080	1.34269	0.00142993	0.0152903	16.1529	31.482	up		Phosphotyrosine protein phosphatases superfamily protein
FvH4_3g36500	1.96155	0.00146226	0.0155354	0.733641	2.61906	up	ORP3C	OSBP(oxysterol binding protein)-related protein 3C
FvH4_2g18610	5.90664	0.0014886	0.0157698	0.0452767	2.83856	up
FvH4_7g12810	1.11522	0.00148772	0.0157698	8.10683	14.302	up		TCP family transcription factor
FvH4_3g40320	1.91004	0.0014925	0.0157926	0.88086	2.54253	up	WNK4,ZIK2	with no lysine (K) kinase 4
FvH4_7g25590	2.15084	0.00150141	0.0158707	0.768978	2.98161	up
FvH4_5g04650	1.35103	0.00150678	0.0159034	20.6276	38.3594	up
FvH4_6g32640	1.33426	0.00151847	0.0160066	25.5713	57.8394	up		GDSL-like Lipase/Acylhydrolase superfamily protein
FvH4_3g41140	1.61464	0.00153953	0.0161999	1.85066	4.38657	up		oxidoreductases, acting on NADH or NADPH, quinone or similar compound as acceptor
FvH4_3g41720	1.24796	0.0015646	0.0163845	3.77889	7.76442	up		Calcium-binding EF-hand family protein
FvH4_1g03542	2.75893	0.00157942	0.0164873	0.604873	3.95622	up
FvH4_1g16440	2.40976	0.00158733	0.0165375	0.550317	2.18393	up		Protein of unknown function (DUF579)
FvH4_2g37690	1.64983	0.00158744	0.0165375	12.6432	37.7441	up	AtCOR47,COR47,RD17	cold-regulated 47
FvH4_3g21751	1.07402	0.00158633	0.0165375	24.6069	40.9309	up	UBQ10	polyubiquitin 10
FvH4_1g08900	3.2089	0.00165462	0.0170841	0.373996	2.85278	up		Protein of unknown function (DUF1677)
FvH4_1g04870	1.10947	0.00166763	0.0172014	2.9539	5.3455	up
FvH4_3g11740	1.16065	0.00167117	0.0172294	4.24788	7.43707	up		Zinc finger (C3HC4-type RING finger) family protein
FvH4_6g29740	1.49167	0.00172476	0.0176859	3.67675	7.95623	up	AHP6,HP6	histidine phosphotransfer protein 6
FvH4_7g29240	3.18416	0.00173291	0.0177434	0.714531	4.40871	up		Sugar isomerase (SIS) family protein
FvH4_5g07331	1.19522	0.00175646	0.0179581	2.32628	4.44154	up		Radical SAM superfamily protein
FvH4_2g09611	1.43354	0.00177858	0.018124	3.45683	5.41978	up
FvH4_5g38170	1.04501	0.00179409	0.0182714	11.5982	20.334	up	MUB6	membrane-anchored ubiquitin-fold protein 6 precursor
FvH4_2g09720	1.09551	0.00180083	0.0183043	15.3891	26.4368	up	AtCXE18,CXE18	carboxyesterase 18
FvH4_2g03060	1.42067	0.00185506	0.0187643	4.34561	10.6993	up		Tetratricopeptide repeat (TPR)-like superfamily protein
FvH4_2g08000	1.05833	0.00186746	0.0188532	9.17142	16.3056	up
FvH4_2g34180	1.60416	0.00186995	0.0188601	2.73828	5.86023	up		Ribosomal protein S5 family protein
FvH4_7g29092	1.6699	0.00190022	0.0190826	0.877976	2.72306	up	FRS5	FAR1-related sequence 5
FvH4_4g27430	1.67027	0.00191968	0.0192226	1.32562	3.48461	up		NAD(P)-binding Rossmann-fold superfamily protein
FvH4_2g30980	1.00161	0.00192322	0.0192488	15.7335	25.6626	up
FvH4_5g04360	1.28156	0.00192507	0.0192488	4.5873	8.97085	up
FvH4_4g07770	1.03273	0.00193584	0.019338	8.31479	14.1976	up	ATCNFU3,NFU3	NFU domain protein 3
FvH4_1g30100	1.22329	0.00195027	0.0194636	11.7427	22.5239	up		carbon-sulfur lyases
FvH4_6g29280	1.31419	0.00196295	0.0195621	1.44543	2.99265	up		Polynucleotidyl transferase, ribonuclease H-like superfamily protein
FvH4_1g02670	1.02017	0.00196638	0.0195848	10.5044	19.3373	up	MSS3	Calcium-binding EF-hand family protein
FvH4_7g17240	1.39625	0.00198909	0.0197834	3.35908	6.92315	up
FvH4_5g09180	2.47785	0.00201027	0.0199478	0.633702	2.30897	up	PHT3;2	phosphate transporter 3;2
FvH4_6g01190	1.48861	0.0020112	0.0199478	4.90014	11.2136	up	TET2	tetraspanin2
FvH4_5g01230	1.51826	0.00204568	0.0202322	3.63874	9.17681	up	ATNYE1,NYE1	non-yellowing 1
FvH4_1g12460	1.24895	0.00206527	0.0203873	9.64843	9.01959	up		alpha/beta-Hydrolases superfamily protein
FvH4_2g03930	2.50039	0.00207034	0.0204277	1.80195	8.92425	up		Uncharacterised protein family SERF
FvH4_1g18080	1.16775	0.00207631	0.0204577	5.15241	9.18742	up		Carbohydrate-binding protein
FvH4_1g24330	1.16637	0.00209142	0.0205594	5.66043	10.4946	up	NDH-O	NAD(P)H:plastoquinone dehydrogenase complex subunit O
FvH4_7g00510	1.02891	0.00214292	0.0209755	149.652	244.362	up		Thioredoxin superfamily protein
FvH4_7g25660	1.52464	0.00219098	0.0212589	1.3406	3.18107	up	ATAZG1,AZG1	AZA-guanine resistant1
FvH4_6g05230	1.97279	0.00225123	0.0217203	0.762748	2.3891	up		Protein of unknown function (DUF3049)
FvH4_3g38680	1.42353	0.00226036	0.0217783	0.967253	2.11911	up	ATPLC2,PLC2	phospholipase C 2
FvH4_4g34800	1.38299	0.00226335	0.0217901	27.252	55.1893	up	ATTPS10,TPS10	trehalose phosphate synthase
FvH4_1g13190	1.64612	0.00227412	0.0218419	2.57474	6.95606	up		alpha/beta-Hydrolases superfamily protein
FvH4_6g22790	2.3585	0.00230405	0.0220568	0.740743	2.75808	up	ATPGIP1,PGIP1	polygalacturonase inhibiting protein 1
FvH4_7g28690	1.56358	0.00233595	0.0223111	1.79422	5.40771	up	AGL6	AGAMOUS-like 6
FvH4_7g17040	1.24603	0.00234185	0.0223492	1.65708	3.30851	up		Pentatricopeptide repeat (PPR) superfamily protein
FvH4_4g36220	1.09269	0.00237441	0.022565	19.9384	33.3954	up
FvH4_7g26800	1.13091	0.0023956	0.0227354	17.6937	30.8686	up	PMSR4	peptide met sulfoxide reductase 4
FvH4_5g16760	1.38241	0.00240334	0.0227778	8.07114	18.7463	up
FvH4_3g20270	1.08487	0.0024224	0.0229168	22.7763	37.6252	up		Nucleic acid-binding, OB-fold-like protein
FvH4_2g13240	2.91054	0.00242789	0.022948	0.456565	2.61276	up		Integrase-type DNA-binding superfamily protein
FvH4_5g08740	1.44329	0.00244567	0.0230743	1.61857	3.59838	up		Protein with RNI-like/FBD-like domains
FvH4_2g32930	1.45411	0.00246147	0.0231711	21.3	44.074	up	FRO1	NADH-ubiquinone oxidoreductase-related
FvH4_2g39791	1.02374	0.00247681	0.0232527	5.72556	9.85523	up		CBS domain-containing protein with a domain of unknown function (DUF21)
FvH4_4g36900	1.12066	0.00247671	0.0232527	8.73278	16.5204	up
FvH4_5g39660	1.14454	0.00247543	0.0232527	2.11567	3.8394	up		P-loop containing nucleoside triphosphate hydrolases superfamily protein
FvH4_2g38560	1.0073	0.00247799	0.0232533	10.4319	16.8644	up		C2H2-like zinc finger protein
FvH4_5g20340	1.17062	0.00248582	0.0233163	14.7794	26.6007	up	GDH2	glutamate dehydrogenase 2
FvH4_3g28040	1.02772	0.00249167	0.0233475	14.4781	25.3941	up	ADS3,FAD5,FADB,JB67	fatty acid desaturase 5
FvH4_5g00180	1.09075	0.00258774	0.0240349	17.4802	28.8738	up
FvH4_6g28280	2.68285	0.00258664	0.0240349	0.865754	3.81796	up	4-Oct,AtOCT4	organic cation/carnitine transporter4
FvH4_7g20050	1.12108	0.00258431	0.0240349	687.446	1155.24	up		GTP binding Elongation factor Tu family protein
FvH4_6g22530	1.08008	0.00259847	0.0241239	7.22387	12.7937	up
FvH4_4g31800	2.19838	0.00265358	0.0245482	1.16196	4.21524	up
FvH4_1g08541	3.40873	0.00268626	0.0247629	0.269728	2.59489	up	ATGER3,GER3,GLP3,GLP3A,GLP3B	germin 3
FvH4_4g31650	1.01155	0.002696	0.0248324	9.04957	14.956	up		NAD(P)-linked oxidoreductase superfamily protein
FvH4_4g11250	1.05366	0.00270253	0.024869	42.5333	69.9852	up		Protein of unknown function (DUF1685)
FvH4_5g35070	1.27351	0.00271468	0.0249369	3.05807	6.19752	up		Tetratricopeptide repeat (TPR)-like superfamily protein
FvH4_5g11021	1.03067	0.00284128	0.0258829	20.8166	34.1154	up		Phosphoenolpyruvate carboxylase family protein
FvH4_4g34590	1.03223	0.00284915	0.0259102	81.0695	130.647	up	ENT1,ENT1,AT	equilibrative nucleotide transporter 1
FvH4_3g40270	1.53511	0.00288183	0.0261618	0.897612	2.12477	up		FAD/NAD(P)-binding oxidoreductase family protein
FvH4_6g14280	2.55559	0.00304477	0.0273323	95.1842	416.568	up
FvH4_2g27080	1.13529	0.00305985	0.0274441	52.4767	89.5187	up		Acyl-CoA N-acyltransferases (NAT) superfamily protein
FvH4_5g29630	1.32709	0.00307652	0.0275581	6.62433	11.3444	up		GNS1/SUR4 membrane protein family
FvH4_3g04690	1.59358	0.00314641	0.0280759	4.021	9.59777	up
FvH4_3g12790	1.38447	0.00315105	0.0281023	10.918	21.1002	up		RING/U-box superfamily protein
FvH4_7g19810	4.05985	0.00315584	0.028124	0.218709	0.640286	up	SCPL27	serine carboxypeptidase-like 27
FvH4_1g24950	1.27744	0.00316155	0.0281629	8.23597	15.9603	up
FvH4_5g34720	1.4466	0.00316501	0.0281697	43.4598	89.4957	up
FvH4_1g02121	1.16173	0.00320672	0.0284168	3.2294	6.44411	up		2-oxoglutarate (2OG) and Fe(II)-dependent oxygenase superfamily protein
FvH4_5g25260	1.11768	0.00322764	0.028581	160.456	267.594	up	CAT2	catalase 2
FvH4_5g25720	1.16052	0.00324114	0.028652	1.41645	3.0378	up	JK218,NPH3,RPT3	Phototropic-responsive NPH3 family protein
FvH4_1g15680	3.10838	0.00325186	0.0287103	0.281214	1.60955	up		NAD(P)-binding Rossmann-fold superfamily protein
FvH4_2g10100	1.25621	0.00334917	0.0293833	4.00032	7.91625	up	MCT2	MEI2 C-terminal RRM only like 2
FvH4_1g16240	1.06364	0.00340678	0.0297658	5.48185	9.81967	up		F-box/RNI-like superfamily protein
FvH4_7g13210	1.03118	0.00348162	0.0303289	30.9478	50.3418	up		F-box family protein
FvH4_6g31020	1.41076	0.00349087	0.0303715	1.67575	4.24269	up		structural molecules
FvH4_2g24470	1.18985	0.00355513	0.0307768	9.41482	15.9072	up		Nucleic acid-binding, OB-fold-like protein
FvH4_5g33670	1.16947	0.00360523	0.0311073	1.78395	3.56462	up	ZF14	MATE efflux family protein
FvH4_2g39130	4.5677	0.00361759	0.0311754	0.21645	3.97436	up		glyoxal oxidase-related protein
FvH4_5g06070	1.32675	0.0036402	0.0313187	1.40532	3.02665	up	ATMYB86,MYB86	myb domain protein 86
FvH4_2g24150	1.04119	0.00369535	0.0316627	39.1999	62.7436	up	ABP,ABP1	endoplasmic reticulum auxin binding protein 1
FvH4_7g25240	1.35802	0.00383336	0.0326914	8.91177	16.5787	up
FvH4_3g07071	1.1011	0.00389019	0.0330611	1.951	3.41671	up	ATNLM2,NIP1;2,NLM2	NOD26-like intrinsic protein 1;2
FvH4_5g15030	1.15991	0.0038981	0.0331013	1.03147	1.92794	up		pentatricopeptide (PPR) repeat-containing protein
FvH4_4g04100	1.08531	0.00390319	0.0331177	10.5742	18.7075	up	EDA6,MEE37	embryo sac development arrest 6
FvH4_6g02660	1.36371	0.00402296	0.0338453	1.38438	3.13635	up	ATWRKY74,WRKY74	WRKY DNA-binding protein 74
FvH4_6g07650	3.67737	0.00404421	0.0339557	0.209303	2.22843	up		RNI-like superfamily protein
FvH4_3g36890	1.13738	0.00412444	0.0344357	12.2822	21.2181	up	LUX,PCL1	Homeodomain-like superfamily protein
FvH4_6g13930	1.05994	0.00414325	0.0345652	11.9225	19.7726	up		TatD related DNase
FvH4_2g33130	1.67701	0.00422351	0.0351086	1.30438	3.17894	up		Galactose oxidase/kelch repeat superfamily protein
FvH4_7g05951	2.53773	0.00428207	0.0354403	0.563405	2.47503	up
FvH4_3g28090	1.22992	0.00430583	0.0356087	26.8579	48.0718	up	AGT,AGT1,SGAT	alanine:glyoxylate aminotransferase
FvH4_2g28300	1.16797	0.00431569	0.0356479	4.94182	9.81449	up	KNAT3	KNOTTED1-like homeobox gene 3
FvH4_5g20710	1.14575	0.00439603	0.0361686	8.8179	15.3126	up		Histone H3 K4-specific methyltransferase SET7/9 family protein
FvH4_4g30770	1.28774	0.00439853	0.0361749	2.72858	5.3448	up
FvH4_3g43061	4.92342	0.00449532	0.036754	0.0442072	1.17393	up
FvH4_7g09820	1.00198	0.00452068	0.0369166	51.3231	80.5064	up	HAT3	homeobox-leucine zipper protein 3
FvH4_5g10480	1.63257	0.00453241	0.0369849	1.65315	4.10269	up		Subtilase family protein
FvH4_3g30010	1.17208	0.00458155	0.0372282	4.85725	9.82223	up
FvH4_1g17550	1.15349	0.00467766	0.0378304	2.58132	4.65939	up	CPR30	F-box and associated interaction domains-containing protein
FvH4_7g21310	5.498	0.00471979	0.0380533	0	0.454621	up		Protein of unknown function (DUF674)
FvH4_1g00201	1.08569	0.00476817	0.0383356	3.02886	5.60722	up	AtITPK4,ITPK4	inositol 1,3,4-trisphosphate 5/6-kinase 4
FvH4_4g01660	1.03729	0.0047769	0.038351	25.7067	42.1695	up	APS1	ATP sulfurylase 1
FvH4_5g26020	1.61304	0.00479935	0.0384869	1.49405	3.86953	up		NAD(P)-binding Rossmann-fold superfamily protein
FvH4_2g32940	1.57794	0.00486751	0.0389058	6.57708	13.611	up
FvH4_3g37280	1.98207	0.00486835	0.0389058	1.86818	5.86032	up	UGT76E2	UDP-glucosyl transferase 76E2
FvH4_3g14600	7.74085	0.00488094	0.0389618	0	2.75317	up	LCR74,PDF2.5	Scorpion toxin-like knottin superfamily protein
FvH4_5g12760	1.35893	0.00487979	0.0389618	56.9378	110.057	up
FvH4_6g41830	2.30092	0.00488085	0.0389618	3.26528	14.1508	up
FvH4_6g31440	1.09839	0.00490301	0.0390931	2.9426	4.92174	up	ATMBAC2,BAC2	Mitochondrial substrate carrier family protein
FvH4_7g03850	1.60301	0.00503112	0.0398409	0.783604	1.97797	up		Tetratricopeptide repeat (TPR)-like superfamily protein
FvH4_7g23181	1.03215	0.00514579	0.0405539	8.62063	13.7401	up		Protein of unknown function (DUF668)
FvH4_5g17640	1.61875	0.00541918	0.0421474	11.8311	28.1734	up
FvH4_7g21400	1.9493	0.00558609	0.0431564	1.1903	3.3013	up	PPL2	PsbP-like protein 2
FvH4_1g18251	1.69024	0.00564336	0.0434863	1.3406	3.90702	up		Thioredoxin superfamily protein
FvH4_7g11980	1.04884	0.00569195	0.0437639	6.08371	10.6071	up	LBD31	LOB domain-containing protein 31
FvH4_3g18920	1.08044	0.00569582	0.0437776	3.48581	5.94189	up		F-box family protein
FvH4_2g28720	1.22031	0.00582138	0.0445624	3.06521	5.92307	up	AtGUS3,GUS3	glucuronidase 3
FvH4_3g16240	1.38242	0.00609079	0.0461546	3.97889	8.10955	up	ATGSTU19,GST8,GSTU19	glutathione S-transferase TAU 19
FvH4_6g03400	1.03243	0.00611774	0.0462884	8.36504	13.4439	up		Sodium/calcium exchanger family protein
FvH4_4g30650	1.11205	0.00630201	0.0473278	1.95938	3.78763	up		Protein of unknown function (DUF1336)
FvH4_1g14120	1.10427	0.00637612	0.0477079	2.34159	4.53508	up	GATL2	galacturonosyltransferase-like 2
FvH4_5g38250	4.97143	0.00640571	0.0478608	0.0758691	1.86998	up
FvH4_6g15700	2.42163	0.00646976	0.0482014	0.615493	2.93989	up	ATFLA11,FLA11	FASCICLIN-like arabinogalactan-protein 11
FvH4_5g02720	1.03829	0.00648973	0.0482642	5.57583	9.14225	up		hydroxyproline-rich glycoprotein family protein
FvH4_6g31480	1.48134	0.00651478	0.0483644	7.89899	17.3949	up		Ribosomal protein L31
FvH4_5g34940	2.04631	0.00678456	0.0497662	1.10853	3.2837	up
FvH4_2g00420	2.21111	0.0068091	0.0498412	1.20355	4.69334	up
FvH4_6g40200	1.30058	0.00680702	0.0498412	2.80948	5.84286	up	atcax2,CAX2	cation exchanger 2
FvH4_7g22281	1.97933	0.00684079	0.0499989	0.555183	1.89346	up	ATHSP70,HSP70	heat shock protein 70
FvH4_6g27400	-6.87695	1.87091e-206	3.90982e-202	563.131	4.16199	down	LSH10	Protein of unknown function (DUF640)
FvH4_4g02460	-6.20303	9.04999e-138	9.45633e-134	1299.97	15.6368	down
FvH4_2g08910	-5.62307	1.04912e-131	7.30817e-128	728.177	12.2884	down	ATRL2,MEE3,RSM1	Homeodomain-like superfamily protein
FvH4_5g07540	-6.04584	1.33064e-69	3.97252e-66	82.2565	1.12667	down	CYP71A26	cytochrome P450, family 71, subfamily A, polypeptide 26
FvH4_6g01940	-3.58263	3.25722e-61	8.50868e-58	243.425	17.9831	down	LSH1	Protein of unknown function (DUF640)
FvH4_5g01240	-5.12073	2.73849e-57	5.7229e-54	27.5792	0.665902	down	AGL19,GL19	AGAMOUS-like 19
FvH4_3g07770	-5.12364	2.77713e-51	4.46435e-48	202.289	4.54444	down	LSH10	Protein of unknown function (DUF640)
FvH4_4g27440	-3.86916	1.44136e-45	1.88259e-42	112.532	6.7929	down	AGL22,SVP	K-box region and MADS-box transcription factor family protein
FvH4_6g53760	-2.85454	4.66164e-40	4.87095e-37	128.631	15.1905	down		Squamosa promoter-binding protein-like (SBP domain) transcription factor family protein
FvH4_2g21310	-2.77892	1.00498e-38	9.1313e-36	327.026	40.9766	down	LSH3	Protein of unknown function (DUF640)
FvH4_6g30780	-4.38542	3.14626e-38	2.73961e-35	28.1522	1.09795	down	ATGA3OX1,GA3OX1,GA4	gibberellin 3-oxidase 1
FvH4_1g13440	-3.40427	8.45493e-38	7.06764e-35	20.6842	1.67545	down		Sulfite exporter TauE/SafE family protein
FvH4_6g05700	-2.94797	9.6971e-37	7.50555e-34	54.2576	6.09329	down
FvH4_1g17970	-4.58195	8.84093e-36	6.59849e-33	14.9034	0.561189	down	scpl1	serine carboxypeptidase-like 1
FvH4_1g04240	-4.51355	1.53706e-35	1.10763e-32	29.118	1.14628	down	AXR2,IAA7	indole-3-acetic acid 7
FvH4_2g04502	-2.65356	2.6125e-34	1.76116e-31	215.543	28.4927	down
FvH4_5g10880	-4.59218	2.93629e-31	1.61481e-28	19.6787	0.721791	down	CYP78A6	cytochrome P450, family 78, subfamily A, polypeptide 6
FvH4_6g39810	-3.02872	7.78145e-31	4.06542e-28	69.3056	7.14619	down	AtUGT85A3,UGT85A3	UDP-glucosyl transferase 85A3
FvH4_7g24370	-3.00736	9.68916e-31	4.93864e-28	347.028	35.4157	down	CBB3,CPD,CYP90,CYP90A,CYP90A1,DWF3	Cytochrome P450 superfamily protein
FvH4_1g14680	-3.57054	2.20698e-30	1.07259e-27	12.2172	0.869064	down	REM39,VRN1	AP2/B3-like transcriptional factor family protein
FvH4_2g18930	-4.08488	2.06745e-29	9.19267e-27	5.56434	0.286259	down	ATDCL3,DCL3	dicer-like 3
FvH4_5g27870	-2.92529	5.37092e-29	2.20081e-26	43.8048	4.70913	down	AtMYB117,LOF1,MYB117	myb domain protein 117
FvH4_6g46340	-2.32534	5.32879e-29	2.20081e-26	562.144	96.968	down		Pollen Ole e 1 allergen and extensin family protein
FvH4_3g43490	-3.91464	2.73089e-28	1.07679e-25	18.3226	1.08649	down	BGLU17	beta glucosidase 17
FvH4_1g14670	-3.11534	1.65019e-27	6.38622e-25	139.94	14.4555	down	REM39,VRN1	AP2/B3-like transcriptional factor family protein
FvH4_2g37840	-4.12727	4.64588e-27	1.73374e-24	11.5764	0.548199	down	AMY2,ATAMY2	alpha-amylase-like 2
FvH4_1g12716	-3.50335	1.98973e-26	7.16921e-24	11.2952	0.877628	down		P-loop containing nucleoside triphosphate hydrolases superfamily protein
FvH4_1g09300	-2.85672	2.61726e-26	9.27041e-24	114.887	13.9395	down		SAUR-like auxin-responsive protein family
FvH4_5g03320	-5.54685	4.35144e-26	1.51561e-23	23.3278	0.414486	down		Late embryogenesis abundant (LEA) hydroxyproline-rich glycoprotein family
FvH4_2g27701	-4.50631	3.48006e-24	1.13635e-21	3.64803	0.1465	down		disease resistance protein (TIR-NBS-LRR class), putative
FvH4_1g17210	-2.50194	5.88617e-23	1.80896e-20	35.5872	5.49597	down		2-oxoglutarate (2OG) and Fe(II)-dependent oxygenase superfamily protein
FvH4_2g38080	-6.65431	6.97106e-23	2.11132e-20	16.8218	0.11007	down	atbzip14,FD,FD-1	Basic-leucine zipper (bZIP) transcription factor family protein
FvH4_2g06010	-5.71769	1.94278e-22	5.71834e-20	16.4415	0.259467	down	CYP707A4	cytochrome P450, family 707, subfamily A, polypeptide 4
FvH4_3g01120	-4.30687	2.49168e-22	7.2321e-20	18.7982	0.732051	down
FvH4_6g38450	-4.03853	3.0796e-22	8.8161e-20	35.3094	11.7021	down	AB140,CAB1,CAB140,LHCB1.3	chlorophyll A/B binding protein 1
FvH4_7g25401	-2.59386	3.29027e-22	9.2919e-20	115.046	16.2562	down		Heavy metal transport/detoxification superfamily protein
FvH4_2g25980	-2.65623	7.135e-22	1.93646e-19	18.1021	2.49072	down		Plant invertase/pectin methylesterase inhibitor superfamily
FvH4_2g32000	-2.58612	2.44342e-21	6.38282e-19	25.8794	3.77138	down	ATCBL10,CBL10,SCABP8	calcineurin B-like protein 10
FvH4_6g18480	-11.2605	1.59065e-20	3.9573e-18	60.9265	0	down	ATC	centroradialis
FvH4_6g53330	-4.07809	3.79085e-20	9.32014e-18	20.9871	1.36483	down	CYP94B2	cytochrome P450, family 94, subfamily B, polypeptide 2
FvH4_7g00214	-2.31406	7.34353e-20	1.78448e-17	153.732	26.4667	down	BGLU17	beta glucosidase 17
FvH4_3g24700	-11.5587	7.89665e-20	1.89683e-17	54.1525	0	down	ATC	centroradialis
FvH4_3g02100	-6.09563	1.80791e-19	4.15184e-17	4.22624	0.0547791	down
FvH4_6g41500	-3.30417	3.39353e-19	7.70847e-17	88.5368	8.36062	down
FvH4_1g16103	-4.0334	3.45436e-19	7.76228e-17	9.72334	0.562321	down		alpha/beta-Hydrolases superfamily protein
FvH4_3g11120	-2.0109	6.13996e-19	1.3443e-16	933.123	194.689	down	LSH6	Protein of unknown function (DUF640)
FvH4_1g16350	-2.98481	8.74095e-19	1.86396e-16	99.7147	11.2767	down	AP2,FL1,FLO2	Integrase-type DNA-binding superfamily protein
FvH4_3g17650	-2.57679	1.09808e-18	2.31795e-16	128.816	19.4374	down	ATTPS1,TPS1	trehalose-6-phosphate synthase
FvH4_1g06350	-2.02258	1.23332e-18	2.57739e-16	60.5498	12.791	down		Pectin lyase-like superfamily protein
FvH4_4g07110	-4.54837	1.97023e-18	4.07661e-16	9.488	0.383954	down		Ankyrin repeat family protein
FvH4_3g02732	-6.60417	3.77727e-18	7.51784e-16	4.45344	0.301928	down	CRK25	cysteine-rich RLK (RECEPTOR-like protein kinase) 25
FvH4_5g00430	-2.52245	4.7859e-18	9.40046e-16	271.285	38.5339	down	PME1	pectin methylesterase inhibitor 1
FvH4_6g27610	-3.07735	9.94538e-18	1.90678e-15	24.4934	2.54102	down		Peroxidase superfamily protein
FvH4_3g06030	-4.04571	1.34406e-17	2.53047e-15	20.5385	1.12511	down		glycosyl hydrolase family 17 protein
FvH4_5g04420	-3.0378	4.89346e-17	8.81582e-15	161.214	17.7596	down	SLP3	subtilisin-like serine protease 3
FvH4_5g16240	-1.75165	5.22623e-17	9.33486e-15	160.427	41.8888	down	ARR5,ATRR2,IBC6,RR5	response regulator 5
FvH4_5g03782	-4.5676	7.06362e-17	1.23013e-14	2.13783	0.0820577	down	ATMRP14,MRP14	multidrug resistance-associated protein 14
FvH4_1g12717	-3.05227	1.03631e-16	1.74651e-14	9.70558	1.48835	down		P-loop containing nucleoside triphosphate hydrolases superfamily protein
FvH4_1g13970	-1.89445	1.59052e-16	2.638e-14	54.6237	12.7435	down		UDP-Glycosyltransferase superfamily protein
FvH4_2g23440	-3.15228	1.61048e-16	2.65007e-14	4.72392	0.430926	down	ABC33,ATCPS1,CPS,CPS1,GA1	Terpenoid cyclases/Protein prenyltransferases superfamily protein
FvH4_3g40280	-2.12804	2.08471e-16	3.37985e-14	135.262	27.3903	down	CHAL,EPFL6	allergen-related
FvH4_6g19530	-4.36544	2.08632e-16	3.37985e-14	8.34342	0.366603	down		F-box family protein
FvH4_6g05090	-1.98042	5.49514e-16	8.56996e-14	24.6633	5.68654	down	ERD6	Major facilitator superfamily protein
FvH4_4g31230	-2.67068	1.05294e-15	1.61797e-13	96.3134	13.8228	down		Homeodomain-like superfamily protein
FvH4_4g03750	-2.03774	1.23141e-15	1.86479e-13	54.236	11.086	down	LSH6	Protein of unknown function (DUF640)
FvH4_5g18010	-1.92228	1.66307e-15	2.50035e-13	35.6531	7.86927	down	GAD4	glutamate decarboxylase 4
FvH4_7g18260	-3.92571	3.39344e-15	4.92473e-13	5.73191	0.440422	down	anac028,NAC028	NAC domain containing protein 28
FvH4_6g14600	-3.79469	4.09111e-15	5.89627e-13	34.3343	2.07545	down		Plant protein 1589 of unknown function
FvH4_4g26090	-1.9166	5.77525e-15	8.10007e-13	127.584	28.1428	down	KNAT6,KNAT6L,KNAT6S	KNOTTED1-like homeobox gene 6
FvH4_5g10290	-2.41386	7.76928e-15	1.08242e-12	8.47018	1.37318	down		Nucleoporin autopeptidase
FvH4_6g09160	-3.26219	1.27289e-14	1.72733e-12	11.6409	1.07006	down		Protein of unknown function (DUF567)
FvH4_4g16850	-3.4684	1.60465e-14	2.14961e-12	5.01356	0.390493	down		inosine-uridine preferring nucleoside hydrolase family protein
FvH4_2g31660	-1.92673	1.65092e-14	2.1836e-12	38.6871	9.04267	down	CYP711A1,MAX1	cytochrome P450, family 711, subfamily A, polypeptide 1
FvH4_7g11610	-1.56879	1.74811e-14	2.29761e-12	91.2952	26.5398	down		Leucine-rich repeat protein kinase family protein
FvH4_1g26340	-2.13385	1.95025e-14	2.54727e-12	44.9749	8.93521	down	ATRL6,RL6,RSM3	RAD-like 6
FvH4_6g44360	-2.13746	3.58982e-14	4.60246e-12	33.0384	6.37364	down	CYCD6;1	Cyclin D6;1
FvH4_7g01720	-2.97511	3.71712e-14	4.73661e-12	30.4932	3.31804	down	AGL15	AGAMOUS-like 15
FvH4_4g34360	-5.26079	5.13339e-14	6.50168e-12	3.6375	0.0900495	down		Protein kinase superfamily protein
FvH4_2g15050	-2.20724	6.28119e-14	7.90749e-12	690.418	120.37	down	ARPN	plantacyanin
FvH4_4g20720	-1.9451	6.54699e-14	8.19276e-12	35.7	7.77664	down
FvH4_7g10850	-2.49026	6.8805e-14	8.55886e-12	18.2473	2.84028	down	cycp3;1	cyclin p3;1
FvH4_5g23860	-1.96772	6.99707e-14	8.62291e-12	25.7589	5.63013	down	BRX,NLM9	DZC (Disease resistance/zinc finger/chromosome condensation-like region) domain containing protein
FvH4_7g26030	-2.93824	7.01452e-14	8.62291e-12	80.4745	9.80032	down	ATWRKY70,WRKY70	WRKY DNA-binding protein 70
FvH4_6g05540	-1.62229	8.11289e-14	9.85716e-12	77.3664	21.6468	down	HAP5C,NF-YC9	nuclear factor Y, subunit C9
FvH4_6g28840	-2.78993	9.2703e-14	1.11983e-11	14.1153	1.62149	down		C2H2 and C2HC zinc fingers superfamily protein
FvH4_1g22250	-2.41681	1.51665e-13	1.80065e-11	12.0574	2.08275	down	ATCNGC1,CNGC1	cyclic nucleotide gated channel 1
FvH4_3g45780	-3.5812	1.77575e-13	2.08481e-11	14.8873	1.07533	down
FvH4_1g20130	-4.47115	1.87601e-13	2.19022e-11	13.8577	0.512979	down		Protein of unknown function, DUF617
FvH4_6g30880	-1.93614	1.98949e-13	2.293e-11	30.5466	6.90488	down		catalytic LigB subunit of aromatic ring-opening dioxygenase family
FvH4_3g18340	-2.64875	2.52918e-13	2.85701e-11	22.348	2.87255	down	LSH10	Protein of unknown function (DUF640)
FvH4_3g06000	-1.54773	2.56389e-13	2.88065e-11	237.875	71.2072	down		basic helix-loop-helix (bHLH) DNA-binding superfamily protein
FvH4_6g04261	-3.23019	2.73861e-13	3.06051e-11	4.29562	0.40394	down		Frigida-like protein
FvH4_6g53351	-3.8009	3.61418e-13	3.97522e-11	13.4753	0.788656	down	AT-SO,AtSO,SOX	sulfite oxidase
FvH4_7g34110	-2.22896	5.33951e-13	5.7518e-11	30.3977	5.58994	down
FvH4_5g10580	-1.72183	5.72347e-13	6.1338e-11	674.121	171.745	down		UDP-Glycosyltransferase superfamily protein
FvH4_3g04940	-4.44226	6.82927e-13	7.28153e-11	7.98056	0.274874	down		Tetraspanin family protein
FvH4_7g08940	-4.09167	7.24333e-13	7.68381e-11	6.97032	0.394228	down		Nodulin MtN3 family protein
FvH4_6g01760	-1.83431	9.5319e-13	1.00605e-10	46.1772	11.5134	down
FvH4_4g20990	-2.69274	1.25963e-12	1.31619e-10	21.1227	2.86212	down		Pectin lyase-like superfamily protein
FvH4_7g17950	-4.2997	1.34446e-12	1.39091e-10	4.35086	0.855388	down	anac028,NAC028	NAC domain containing protein 28
FvH4_5g01400	-1.95612	1.51824e-12	1.5553e-10	37.0238	8.48983	down	NRPD1,NRPD1A,POL,IVA,SDE4,SMD2	nuclear RNA polymerase D1A
FvH4_2g09250	-2.14338	1.63741e-12	1.66109e-10	21.3732	4.36615	down	APL3	Glucose-1-phosphate adenylyltransferase family protein
FvH4_5g09421	-2.02589	1.99521e-12	1.98552e-10	47.2459	10.2764	down		Glycosyl hydrolase family 38 protein
FvH4_1g07670	-2.34547	2.45267e-12	2.40638e-10	19.5614	3.39161	down		alpha/beta-Hydrolases superfamily protein
FvH4_6g41980	-2.80693	2.48902e-12	2.43063e-10	10.645	1.39472	down	MPL1	Myzus persicae-induced lipase 1
FvH4_7g12282	-1.93855	3.91389e-12	3.71784e-10	14.2252	3.33756	down	CYP704A2	cytochrome P450, family 704, subfamily A, polypeptide 2
FvH4_7g25910	-2.0787	4.4553e-12	4.21298e-10	69.0005	14.4091	down
FvH4_6g43500	-5.83053	4.57268e-12	4.3045e-10	6.17149	0.101018	down	RCI3,RCI3A	Peroxidase superfamily protein
FvH4_1g17510	-1.93136	4.79359e-12	4.49222e-10	42.7946	10.1224	down	ATBT4,BT4	BTB and TAZ domain protein 4
FvH4_3g17851	-2.47049	5.26876e-12	4.89363e-10	8.27146	1.26946	down		Leucine-rich repeat transmembrane protein kinase
FvH4_1g10180	-4.061	5.78435e-12	5.30182e-10	5.03693	0.273632	down		Auxin efflux carrier family protein
FvH4_1g05990	-2.07164	6.03968e-12	5.48818e-10	17.4378	3.75707	down		RNA-dependent RNA polymerase family protein
FvH4_4g17060	-3.06299	6.04021e-12	5.48818e-10	17.1193	1.62144	down
FvH4_2g35280	-3.70426	9.04851e-12	8.15068e-10	14.1639	1.01686	down	IAA26,PAP1	phytochrome-associated protein 1
FvH4_4g33130	-2.2325	1.03169e-11	9.17046e-10	63.624	12.2397	down	AHK4,ATCRE1,CRE1,WOL,WOL1	CHASE domain containing histidine kinase protein
FvH4_3g14860	-1.77828	1.12385e-11	9.90979e-10	44.1208	10.531	down		Domain of unknown function (DUF2431)
FvH4_1g07150	-2.73933	1.42683e-11	1.24241e-09	73.6234	10.2452	down	ATET2,ET2	effector of transcription2
FvH4_7g23680	-2.65184	1.46164e-11	1.26745e-09	9.71701	1.61529	down		UDP-Glycosyltransferase superfamily protein
FvH4_3g17580	-2.83486	1.58627e-11	1.36983e-09	6.91603	0.965971	down		F-box/RNI-like/FBD-like domains-containing protein
FvH4_6g50160	-1.72112	1.71415e-11	1.46813e-09	57.9952	15.6316	down	SAG101	senescence-associated gene 101
FvH4_4g15660	-2.52362	1.7499e-11	1.48657e-09	22.6723	3.46761	down	ATOFP16,OFP16	ovate family protein 16
FvH4_7g12700	-1.97315	1.8618e-11	1.56256e-09	129.175	29.751	down	AGL20,ATSOC1,SOC1	AGAMOUS-like 20
FvH4_7g04750	-1.49727	1.87448e-11	1.56691e-09	45.7734	14.7888	down	UBP12	ubiquitin-specific protease 12
FvH4_1g07850	-2.07974	1.96306e-11	1.63442e-09	83.2191	16.3923	down	CHAL,EPFL6	allergen-related
FvH4_4g37260	-2.87417	2.34598e-11	1.93017e-09	6.61232	0.75362	down		Eukaryotic aspartyl protease family protein
FvH4_1g06000	-2.07097	2.91872e-11	2.38264e-09	27.8861	5.46751	down	ATNADP-ME3,NADP-ME3	NADP-malic enzyme 3
FvH4_7g21060	-2.7254	3.33058e-11	2.68735e-09	3.91184	0.557273	down		disease resistance protein (TIR-NBS-LRR class), putative
FvH4_2g37381	-2.03095	3.7651e-11	3.00317e-09	32.9475	8.70643	down	SBE2.2	starch branching enzyme 2.2
FvH4_6g37770	-1.55931	3.752e-11	3.00317e-09	75.0471	21.5374	down	AtRLP29,RLP29	receptor like protein 29
FvH4_4g12490	-1.96365	5.26661e-11	4.12216e-09	161.968	33.1629	down	ATB2	NAD(P)-linked oxidoreductase superfamily protein
FvH4_3g07740	-2.50143	5.63873e-11	4.3806e-09	22.0986	3.23909	down
FvH4_6g01941	-1.54979	6.42586e-11	4.93705e-09	76.9024	22.2159	down	THA1	threonine aldolase 1
FvH4_4g27260	-2.1173	6.8371e-11	5.23376e-09	10.2124	2.03244	down		alpha/beta-Hydrolases superfamily protein
FvH4_3g23492	-2.32225	7.88525e-11	5.99222e-09	8.55442	1.49184	down	UBP12	ubiquitin-specific protease 12
FvH4_6g52950	-1.73972	1.04555e-10	7.8315e-09	25.9787	6.61892	down
FvH4_5g17290	-2.97378	1.08349e-10	8.0867e-09	3.90341	0.438825	down
FvH4_3g14131	-3.49406	1.17614e-10	8.747e-09	9.25842	0.66749	down	ATKS,ATKS1,GA2,KS,KS1	Terpenoid cyclases/Protein prenyltransferases superfamily protein
FvH4_3g03690	-2.56204	1.40154e-10	1.03863e-08	5.97713	0.934496	down		Protein of unknown function (DUF594)
FvH4_1g26220	-1.41631	1.47057e-10	1.08593e-08	27.9061	8.85977	down		Pectin lyase-like superfamily protein
FvH4_5g33810	-2.64694	1.80267e-10	1.31262e-08	45.3351	6.71813	down	bHLH093	beta HLH protein 93
FvH4_1g21110	-1.68635	1.90216e-10	1.37548e-08	14.1001	3.74977	down		VQ motif-containing protein
FvH4_7g15680	-5.78155	2.43806e-10	1.72714e-08	5.78899	0.114981	down	ATCHIA,CHIA	chitinase A
FvH4_5g12640	-4.11603	3.3013e-10	2.28446e-08	8.59747	0.276532	down
FvH4_1g07790	-1.54567	3.67244e-10	2.49315e-08	18.6475	5.51967	down		Survival protein SurE-like phosphatase/nucleotidase
FvH4_2g40890	-1.49789	3.67447e-10	2.49315e-08	16.2397	5.26642	down	ARR12,RR12	response regulator 12
FvH4_2g05604	-2.94654	3.9674e-10	2.68319e-08	5.60805	0.572076	down	UGT73B3	UDP-glucosyl transferase 73B3
FvH4_6g21020	-4.91586	4.24237e-10	2.85991e-08	2.2754	0.076406	down	CPK20	calcium-dependent protein kinase 20
FvH4_1g21780	-2.03489	4.40913e-10	2.95327e-08	85.052	19.0793	down
FvH4_2g15330	-3.48686	5.20467e-10	3.46392e-08	6.51683	0.497835	down		Pyridoxal phosphate (PLP)-dependent transferases superfamily protein
FvH4_7g22593	-1.57979	6.61274e-10	4.31853e-08	25.7918	7.29698	down	APK1,APK1A	Protein kinase superfamily protein
FvH4_1g23232	-1.88885	7.46825e-10	4.84694e-08	13.1415	3.21053	down	EMB3004,MEE32	dehydroquinate dehydratase, putative / shikimate dehydrogenase, putative
FvH4_1g10720	-2.54863	8.66682e-10	5.5558e-08	10.4555	1.47459	down		Arabidopsis protein of unknown function (DUF241)
FvH4_7g28740	-1.76838	9.38199e-10	5.99586e-08	35.3639	8.98965	down	AGL42	AGAMOUS-like 42
FvH4_7g18020	-3.01216	9.82443e-10	6.24045e-08	2.27446	0.257314	down	NTL9	NAC transcription factor-like 9
FvH4_7g30150	-2.73129	1.01906e-09	6.43395e-08	6.27797	0.863317	down		Protein of unknown function (DUF819)
FvH4_5g17220	-5.88747	1.0722e-09	6.72877e-08	5.81305	0.0873785	down		O-methyltransferase family protein
FvH4_3g42750	-2.2392	1.09214e-09	6.83337e-08	5.01697	0.929275	down	ATCSLE1,CSLE1	cellulose synthase like E1
FvH4_2g21540	-1.54464	1.13636e-09	7.07973e-08	13.5816	3.83207	down	PHT1;7	phosphate transporter 1;7
FvH4_4g26140	-1.30649	1.186e-09	7.33283e-08	134.37	45.4929	down
FvH4_7g18000	-3.50019	1.23101e-09	7.58868e-08	5.59216	0.478373	down	anac028,NAC028	NAC domain containing protein 28
FvH4_5g28280	-2.54616	1.41051e-09	8.61522e-08	5.00607	0.764617	down		FAD/NAD(P)-binding oxidoreductase family protein
FvH4_1g05980	-2.42763	1.5907e-09	9.57996e-08	58.583	10.0813	down		RNA-dependent RNA polymerase family protein
FvH4_5g05550	-1.90347	1.68959e-09	1.00875e-07	16.3839	3.91944	down
FvH4_2g29352	-2.92323	2.0949e-09	1.2367e-07	5.55847	0.666847	down
FvH4_3g07021	-4.969	2.16466e-09	1.2707e-07	11.8593	0.34791	down
FvH4_1g24670	-2.11779	2.87019e-09	1.65694e-07	9.30295	1.79412	down		Copine (Calcium-dependent phospholipid-binding protein) family
FvH4_6g36190	-1.95863	3.22017e-09	1.83866e-07	10.3295	2.33904	down		alpha/beta-Hydrolases superfamily protein
FvH4_3g29900	-1.41556	3.29028e-09	1.87358e-07	115.436	36.3158	down	ATPSK3,PSK1,PSK3	PHYTOSULFOKINE 3 PRECURSOR
FvH4_1g12700	-2.68684	3.44669e-09	1.94673e-07	6.06911	0.871774	down		P-loop containing nucleoside triphosphate hydrolases superfamily protein
FvH4_2g32910	-3.12109	3.51286e-09	1.97343e-07	2.62625	0.270916	down		Xanthine/uracil permease family protein
FvH4_2g05603	-3.53455	4.03383e-09	2.24797e-07	8.0484	1.50644	down	UGT73B3	UDP-glucosyl transferase 73B3
FvH4_3g30320	-1.89564	4.08897e-09	2.26661e-07	42.9646	9.72746	down		Bifunctional inhibitor/lipid-transfer protein/seed storage 2S albumin superfamily protein
FvH4_5g35630	-1.95806	4.10268e-09	2.2682e-07	5.29077	1.21342	down	REN1	Rho GTPase activation protein (RhoGAP) with PH domain
FvH4_1g07470	-3.53824	4.15156e-09	2.28917e-07	3.82349	0.327628	down	AtTMN7,TMN7	transmembrane nine 7
FvH4_4g33000	-4.38897	4.57335e-09	2.50193e-07	2.37148	0.116495	down	TBL2	Plant protein of unknown function (DUF828)
FvH4_5g04950	-1.78101	4.60729e-09	2.51392e-07	56.6564	13.6024	down
FvH4_5g05280	-1.46948	4.89711e-09	2.66037e-07	112.124	36.1877	down	ATMYB66,MYB66,WER,WER1	myb domain protein 66
FvH4_6g18100	-1.42951	4.90501e-09	2.66037e-07	58.1681	18.7896	down
FvH4_6g46500	-1.58198	4.91388e-09	2.66037e-07	52.404	14.5597	down	BR6OX2,CYP85A2	brassinosteroid-6-oxidase 2
FvH4_3g43220	-1.63375	5.02241e-09	2.70969e-07	20.9483	5.72629	down		AGC (cAMP-dependent, cGMP-dependent and protein kinase C) kinase family protein
FvH4_2g32900	-1.85196	5.34559e-09	2.86441e-07	46.1613	11.1861	down
FvH4_3g19770	-2.66863	5.33422e-09	2.86441e-07	13.2984	1.71289	down	AtENODL3,ENODL3	early nodulin-like protein 3
FvH4_3g42743	-2.03441	5.94907e-09	3.16345e-07	5.23108	1.14176	down	ATCSLE1,CSLE1	cellulose synthase like E1
FvH4_3g21340	-1.52185	7.09737e-09	3.72665e-07	404.077	123.937	down		Calcium-binding EF-hand family protein
FvH4_3g43250	-1.1647	7.25181e-09	3.7982e-07	53.2139	20.4114	down		Putative glycosyl hydrolase of unknown function (DUF1680)
FvH4_5g05060	-2.75205	7.31979e-09	3.82423e-07	9.96434	1.3886	down		RING/U-box superfamily protein
FvH4_6g49300	-2.93005	7.44654e-09	3.86148e-07	16.2422	1.87395	down
FvH4_5g04610	-1.6428	8.72804e-09	4.45962e-07	48.1804	13.8069	down
FvH4_5g36724	-1.43903	9.57329e-09	4.85589e-07	21.3954	7.07698	down	SNRK2-8,SNRK2.8,SRK2C	Protein kinase superfamily protein
FvH4_5g12460	-3.2405	1.04818e-08	5.29105e-07	3.18648	0.307721	down		PLAC8 family protein
FvH4_2g31680	-1.46046	1.05727e-08	5.32407e-07	17.8885	5.38935	down	CYP711A1,MAX1	cytochrome P450, family 711, subfamily A, polypeptide 1
FvH4_5g31690	-7.78018	1.07244e-08	5.38746e-07	2.07541	0	down		S-locus lectin protein kinase family protein
FvH4_1g17821	-2.34959	1.1391e-08	5.69497e-07	3.02827	0.53288	down		Ribonuclease H-like superfamily protein
FvH4_6g44470	-1.42799	1.15193e-08	5.73166e-07	284.925	88.4116	down		Wound-responsive family protein
FvH4_1g28680	-2.09272	1.20721e-08	5.96411e-07	35.3653	6.74823	down		Calcium-dependent lipid-binding (CaLB domain) family protein
FvH4_2g20300	-1.87807	1.33925e-08	6.56986e-07	5.26156	1.27351	down	ABCG40,ATABCG40,ATPDR12,PDR12	pleiotropic drug resistance 12
FvH4_3g01830	-2.43366	1.37152e-08	6.71243e-07	8.81651	1.31376	down		Homeodomain-like superfamily protein
FvH4_6g35050	-1.34976	1.38403e-08	6.74206e-07	19.289	6.56638	down		inter-alpha-trypsin inhibitor heavy chain-related
FvH4_2g05132	-1.33445	1.42857e-08	6.94283e-07	76.468	25.6545	down	ATCAD4,CAD,CAD-C,CAD4	GroES-like zinc-binding alcohol dehydrogenase family protein
FvH4_2g21772	-2.1044	1.43677e-08	6.9665e-07	9.88368	2.27259	down	DMR6	2-oxoglutarate (2OG) and Fe(II)-dependent oxygenase superfamily protein
FvH4_1g28731	-5.87997	1.44129e-08	6.97226e-07	10.2025	0.131388	down		Gibberellin-regulated family protein
FvH4_6g35560	-2.92694	1.48251e-08	7.13858e-07	6.99515	0.828899	down	LAC14	laccase 14
FvH4_1g08400	-2.4393	1.59685e-08	7.65388e-07	10.9645	1.73191	down		RNA polymerase III RPC4
FvH4_7g28790	-2.16405	1.61866e-08	7.74066e-07	6.47161	1.2273	down		F-box family protein with a domain of unknown function (DUF295)
FvH4_4g33391	-1.1491	1.62895e-08	7.77211e-07	47.7523	18.6007	down	ATRDRP1,RDR1	RNA-dependent RNA polymerase 1
FvH4_2g39350	-1.55329	1.68194e-08	7.98845e-07	87.8571	25.694	down	AtbZIP44,bZIP44	basic leucine-zipper 44
FvH4_6g08760	-1.22858	1.85755e-08	8.7826e-07	39.9415	14.2942	down	FHY2,FRE1,HY8,PHYA	phytochrome A
FvH4_6g48210	-1.31798	2.07474e-08	9.69978e-07	100.418	33.7019	down	AT-EXP1,ATEXP1,ATEXPA1,ATHEXP,ALPHA,1.2,EXP1,EXPA1	expansin A1
FvH4_1g22820	-4.01667	2.2395e-08	1.04225e-06	8.58893	0.536376	down	ATWRKY51,WRKY51	WRKY DNA-binding protein 51
FvH4_6g18150	-2.16266	2.2443e-08	1.04225e-06	3.9679	0.826616	down	ATPDR6,PDR6	pleiotropic drug resistance 6
FvH4_6g35580	-3.24384	2.29489e-08	1.06338e-06	4.53995	0.436985	down	GLIP1	GDSL lipase 1
FvH4_2g07770	-1.50396	2.41466e-08	1.1164e-06	248.241	75.571	down	AHB1,ARATH,GLB1,ATGLB1,GLB1,HB1,NSHB1	hemoglobin 1
FvH4_6g49540	-5.74689	2.43581e-08	1.12301e-06	10.2432	0.210649	down
FvH4_4g37100	-1.69182	2.44692e-08	1.12386e-06	10.9061	2.96878	down	SDE3	P-loop containing nucleoside triphosphate hydrolases superfamily protein
FvH4_6g05050	-2.30797	2.58785e-08	1.17823e-06	43.4108	8.07477	down	SFP2	Major facilitator superfamily protein
FvH4_4g30310	-2.4618	2.61926e-08	1.18994e-06	37.2086	6.37094	down	BGLU40	beta glucosidase 40
FvH4_4g07870	-1.22107	2.65218e-08	1.19968e-06	79.1767	28.8007	down	ATHPT,HPT1,TPT1,VTE2	homogentisate phytyltransferase 1
FvH4_6g22181	-3.10585	2.64756e-08	1.19968e-06	6.28636	0.60849	down		Ribonuclease H-like superfamily protein
FvH4_6g50600	-1.35977	2.6656e-08	1.20315e-06	44.4806	15.4492	down		Protein kinase superfamily protein
FvH4_5g05330	-1.32887	2.82508e-08	1.27238e-06	34.2863	11.8449	down	DOF5.6,HCA2	Dof-type zinc finger DNA-binding family protein
FvH4_2g06880	-1.65797	3.10205e-08	1.38519e-06	32.0939	9.06011	down		Homeodomain-like superfamily protein
FvH4_3g12891	-1.16428	3.17476e-08	1.41162e-06	50.062	19.0468	down	ZIP1	zinc transporter 1 precursor
FvH4_2g35762	-7.91719	3.51669e-08	1.55046e-06	2.2196	0	down		Phosphorylase superfamily protein
FvH4_3g01880	-1.27893	3.67504e-08	1.60671e-06	126.771	45.4422	down		O-Glycosyl hydrolases family 17 protein
FvH4_6g33070	-2.17844	3.88899e-08	1.69317e-06	25.8904	5.20208	down	ATMRP6,MRP6	multidrug resistance-associated protein 6
FvH4_4g08030	-2.69856	3.92632e-08	1.70587e-06	30.2235	3.82003	down
FvH4_4g02480	-1.47588	4.08023e-08	1.76906e-06	92.6151	29.0702	down
FvH4_4g29370	-2.15779	4.14413e-08	1.79304e-06	10.6339	2.18544	down	BAS1,CYP72B1,CYP734A1	Cytochrome P450 superfamily protein
FvH4_5g36440	-1.23698	4.16885e-08	1.80001e-06	67.6074	24.7859	down	ATISA3,ISA3	isoamylase 3
FvH4_4g33881	-1.26752	4.59106e-08	1.97822e-06	85.0013	29.0495	down		Dynein light chain type 1 family protein
FvH4_5g00150	-1.78233	4.63643e-08	1.99366e-06	8.15776	2.09682	down	ATNRT1,B-1,CHL1,CHL1-1,NRT1,NRT1.1	nitrate transporter 1.1
FvH4_2g03560	-2.4497	4.9251e-08	2.09197e-06	29.4116	5.06148	down	scpl18	serine carboxypeptidase-like 18
FvH4_5g04072	-1.93724	5.12589e-08	2.16406e-06	10.3661	2.46038	down	CIP1	COP1-interactive protein 1
FvH4_1g16104	-4.26591	5.33501e-08	2.2478e-06	3.5133	0.17185	down		alpha/beta-Hydrolases superfamily protein
FvH4_5g18321	-1.73202	5.4232e-08	2.27578e-06	239.777	58.3455	down		Bifunctional inhibitor/lipid-transfer protein/seed storage 2S albumin superfamily protein
FvH4_4g25110	-2.25092	5.47025e-08	2.29029e-06	5.27876	0.969413	down		Pectate lyase family protein
FvH4_6g42450	-1.93782	5.81892e-08	2.42239e-06	34.0429	8.03473	down		Major facilitator superfamily protein
FvH4_2g01660	-5.5876	6.14452e-08	2.55285e-06	4.61256	0.0752068	down		Disease resistance-responsive (dirigent-like protein) family protein
FvH4_5g32810	-2.26781	6.70864e-08	2.76523e-06	100.609	19.3248	down		Disease resistance protein (CC-NBS-LRR class) family
FvH4_7g26311	-1.91771	6.94967e-08	2.84773e-06	18.5769	5.05407	down		Calcium-dependent lipid-binding (CaLB domain) family protein
FvH4_5g28980	-1.97855	7.3417e-08	2.99078e-06	5.46465	1.26043	down	AKT2,AKT2/3,AKT3,KT2/3	potassium transport 2/3
FvH4_4g32290	-1.75713	7.44527e-08	3.02707e-06	15.1868	4.06769	down	ATMYB4,MYB4	myb domain protein 4
FvH4_6g24090	-1.28308	7.62597e-08	3.09452e-06	47.0037	16.6648	down		Integrase-type DNA-binding superfamily protein
FvH4_3g35940	-1.48267	8.20285e-08	3.30933e-06	23.5748	7.09431	down
FvH4_4g28010	-1.89371	8.73324e-08	3.50976e-06	12.3062	2.828	down	DOT5,WIP6	C2H2-like zinc finger protein
FvH4_1g20160	-1.28986	8.96283e-08	3.58822e-06	26.8027	9.32293	down		basic helix-loop-helix (bHLH) DNA-binding superfamily protein
FvH4_6g05111	-1.26306	9.00866e-08	3.59967e-06	13.719	4.94374	down	ESL1	ERD (early response to dehydration) six-like 1
FvH4_1g13960	-1.31024	9.38906e-08	3.74451e-06	282.622	99.5889	down		S-adenosyl-L-methionine-dependent methyltransferases superfamily protein
FvH4_6g52311	-4.00588	9.53791e-08	3.79663e-06	2.9104	0.167558	down		PQ-loop repeat family protein / transmembrane family protein
FvH4_5g16230	-1.89686	9.63869e-08	3.82946e-06	62.0424	15.3548	down		alpha/beta-Hydrolases superfamily protein
FvH4_7g08920	-1.44787	9.97504e-08	3.93318e-06	85.9051	26.6062	down		Protein of unknown function (DUF581)
FvH4_5g36240	-1.22126	1.0651e-07	4.18392e-06	92.5487	33.8934	down		basic helix-loop-helix (bHLH) DNA-binding superfamily protein
FvH4_2g16370	-1.87426	1.10542e-07	4.30989e-06	5.8016	1.36028	down		O-fucosyltransferase family protein
FvH4_4g21530	-2.73836	1.14848e-07	4.4621e-06	9.19954	1.25573	down	CIPK1,SnRK3.16	CBL-interacting protein kinase 1
FvH4_4g35240	-2.83075	1.20668e-07	4.66121e-06	2.68784	0.411292	down	ATFH8,FH8	formin 8
FvH4_6g13450	-2.0355	1.24718e-07	4.79992e-06	14.0716	3.18164	down		NB-ARC domain-containing disease resistance protein
FvH4_2g37830	-1.23074	1.29482e-07	4.9559e-06	17.3647	6.36428	down	ATROPGEF1,ROPGEF1	rho guanyl-nucleotide exchange factor 1
FvH4_6g36790	-1.86577	1.39473e-07	5.29948e-06	3.8437	0.917672	down		Leucine-rich receptor-like protein kinase family protein
FvH4_2g10010	-1.86585	1.40977e-07	5.34688e-06	16.9123	3.64796	down	SRS3	SHI-related sequence3
FvH4_4g35880	-1.30315	1.60878e-07	6.05769e-06	19.3621	6.95411	down	ATNHX7,ATSOS1,SOS1	sodium proton exchanger, putative (NHX7) (SOS1)
FvH4_6g38500	-2.06176	1.74353e-07	6.53706e-06	13.1929	2.91192	down	ATGSL07,atgsl7,gsl07	glucan synthase-like 7
FvH4_6g44245	-2.87344	1.87242e-07	6.99997e-06	4.13402	0.538579	down		S-locus lectin protein kinase family protein
FvH4_4g27450	-4.78942	1.89846e-07	7.08465e-06	2.78244	0.100447	down
FvH4_4g21071	-2.27586	2.00603e-07	7.44617e-06	14.0124	2.6231	down
FvH4_4g27110	-1.34919	2.02712e-07	7.51113e-06	223.053	72.8713	down	AGL22,SVP	K-box region and MADS-box transcription factor family protein
FvH4_7g32980	-1.35999	2.09071e-07	7.73305e-06	102.421	35.4453	down	DMR6	2-oxoglutarate (2OG) and Fe(II)-dependent oxygenase superfamily protein
FvH4_3g42361	-1.34051	2.36819e-07	8.69778e-06	16.7877	5.84556	down
FvH4_1g04940	-1.31716	2.80178e-07	1.01476e-05	38.6376	13.7156	down	ATRAB-F2A,ATRAB5A,ATRABF2A,RAB-F2A,RAB5A,RABF2A,RHA1	RAB homolog 1
FvH4_6g37550	-1.54426	2.82064e-07	1.01982e-05	6.84523	2.05184	down		Leucine-rich repeat transmembrane protein kinase
FvH4_4g02260	-4.17814	2.95066e-07	1.06499e-05	4.27172	0.169413	down	IAA3,SHY2	AUX/IAA transcriptional regulator family protein
FvH4_1g02150	-2.17731	3.34862e-07	1.20033e-05	4.67459	0.922699	down		2-oxoglutarate (2OG) and Fe(II)-dependent oxygenase superfamily protein
FvH4_4g33900	-2.34858	3.63495e-07	1.29409e-05	7.12671	1.22075	down	PCR2	PLANT CADMIUM RESISTANCE 2
FvH4_6g11970	-2.3835	3.64949e-07	1.29706e-05	6.35936	1.13168	down	ATPTR5,PTR5	peptide transporter 5
FvH4_5g15540	-1.52395	3.68854e-07	1.30871e-05	30.3211	8.74184	down		NAD(P)-binding Rossmann-fold superfamily protein
FvH4_5g03870	-3.15948	3.74037e-07	1.32038e-05	3.95772	0.684081	down		Zinc-binding dehydrogenase family protein
FvH4_3g44070	-2.00006	3.82656e-07	1.34852e-05	8.58034	1.95169	down		NB-ARC domain-containing disease resistance protein
FvH4_3g13840	-1.6674	3.99296e-07	1.40008e-05	17.1469	4.895	down	ECT8	evolutionarily conserved C-terminal region 8
FvH4_1g09180	-1.88459	4.06533e-07	1.42307e-05	116.241	27.6344	down		Integrase-type DNA-binding superfamily protein
FvH4_2g33540	-1.34029	4.41738e-07	1.53092e-05	20.59	7.03223	down	HOS15	WD-40 repeat family protein
FvH4_4g08700	-2.30945	4.42897e-07	1.5324e-05	3.50684	0.642783	down		ENTH/ANTH/VHS superfamily protein
FvH4_2g38010	-1.52358	4.54108e-07	1.566e-05	12.3823	3.77412	down	CPK29	calcium-dependent protein kinase 29
FvH4_1g01520	-1.28625	4.68577e-07	1.61058e-05	21.7956	7.59771	down		Leucine-rich repeat transmembrane protein kinase family protein
FvH4_7g12080	-2.65612	4.88536e-07	1.66821e-05	11.7524	1.94107	down
FvH4_7g27132	-1.62335	5.13217e-07	1.74111e-05	10.6951	3.05186	down		GroES-like zinc-binding alcohol dehydrogenase family protein
FvH4_6g18830	-1.77223	5.21124e-07	1.76345e-05	12.6803	3.14077	down	ACA1,ATACA1,CAH1	alpha carbonic anhydrase 1
FvH4_5g31920	-2.04667	5.3968e-07	1.82201e-05	6.92619	1.47134	down	UGT88A1	UDP-glucosyl transferase 88A1
FvH4_6g07300	-1.76231	5.42148e-07	1.82739e-05	37.2589	9.92077	down		Adenine nucleotide alpha hydrolases-like superfamily protein
FvH4_4g33460	-1.20991	5.97275e-07	1.99756e-05	53.1455	19.9424	down		Sec14p-like phosphatidylinositol transfer family protein
FvH4_5g32820	-2.58773	6.22606e-07	2.07847e-05	32.325	5.04741	down		Disease resistance protein (CC-NBS-LRR class) family
FvH4_4g35411	-1.38316	6.43175e-07	2.13012e-05	5.01417	1.68368	down		transmembrane receptors;ATP binding
FvH4_6g09130	-2.73384	6.59017e-07	2.17569e-05	8.67802	1.13981	down
FvH4_5g05000	-1.49294	6.81163e-07	2.24526e-05	13.7229	4.23324	down		nodulin MtN21 /EamA-like transporter family protein
FvH4_7g09150	-3.81948	6.87172e-07	2.2615e-05	3.81116	0.237653	down	ARAC9,ATROP8,ROP8	Arabidopsis RAC-like 9
FvH4_5g08060	-2.61381	6.95833e-07	2.2864e-05	16.2702	2.5718	down	CML38	calmodulin-like 38
FvH4_4g02162	-1.78926	7.15787e-07	2.34448e-05	10.137	2.66674	down		acylaminoacyl-peptidase-related
FvH4_2g03461	-2.5755	7.24234e-07	2.36485e-05	4.3436	0.652021	down		F-box/RNI-like superfamily protein
FvH4_3g17360	-3.33762	7.32707e-07	2.38506e-05	2.92475	0.284294	down		Protein kinase superfamily protein
FvH4_3g09291	-1.96487	7.47494e-07	2.42564e-05	29.098	7.04459	down		Disease resistance protein (TIR-NBS-LRR class) family
FvH4_2g15511	-1.63523	7.62796e-07	2.46382e-05	3.18683	0.87358	down		FAD/NAD(P)-binding oxidoreductase family protein
FvH4_3g24730	-1.32519	7.61853e-07	2.46382e-05	36.9282	13.0546	down		alpha/beta-Hydrolases superfamily protein
FvH4_1g23082	-1.31087	8.28994e-07	2.66938e-05	38.008	13.4281	down	ATWRKY13,WRKY13	WRKY DNA-binding protein 13
FvH4_7g17380	-2.04289	8.45133e-07	2.71717e-05	24.3236	5.39555	down		basic helix-loop-helix (bHLH) DNA-binding superfamily protein
FvH4_5g31671	-7.12772	9.27662e-07	2.94624e-05	3.12589	0.108536	down		NAD(P)-binding Rossmann-fold superfamily protein
FvH4_2g32060	-1.46145	9.70476e-07	3.06823e-05	39.3852	12.6808	down	ATH1	homeobox gene 1
FvH4_5g15810	-1.67328	1.01246e-06	3.18173e-05	30.126	7.53047	down		Nodulin-like / Major Facilitator Superfamily protein
FvH4_3g09290	-1.94538	1.02205e-06	3.20704e-05	30.1925	7.38609	down		disease resistance protein (TIR-NBS-LRR class), putative
FvH4_5g17670	-1.58319	1.02677e-06	3.21701e-05	121.242	32.6685	down	KNATM	KNOX Arabidopsis thaliana meinox
FvH4_4g04360	-1.40481	1.0901e-06	3.39508e-05	16.1625	5.28207	down		Cyclopropane-fatty-acyl-phospholipid synthase
FvH4_5g10010	-2.30264	1.09729e-06	3.41236e-05	2.80682	0.52641	down	ATRBOHC,RBOHC,RHD2	NADPH/respiratory burst oxidase protein D
FvH4_7g12070	-1.36372	1.13854e-06	3.53541e-05	200.257	64.8506	down	ZPR2	protein binding
FvH4_3g43390	-1.62805	1.20191e-06	3.7211e-05	4.16022	1.20911	down		NB-ARC domain-containing disease resistance protein
FvH4_6g50391	-1.76545	1.23202e-06	3.80305e-05	15.4846	3.94984	down		nodulin MtN21 /EamA-like transporter family protein
FvH4_2g14760	-2.13853	1.25006e-06	3.84738e-05	7.75978	1.48652	down	ADH,ADH1,ATADH,ATADH1	alcohol dehydrogenase 1
FvH4_4g26060	-3.48437	1.25453e-06	3.85547e-05	4.58118	0.476408	down	MENG	S-adenosyl-L-methionine-dependent methyltransferases superfamily protein
FvH4_2g33770	-1.12994	1.26183e-06	3.8722e-05	197.391	74.9295	down		N-terminal nucleophile aminohydrolases (Ntn hydrolases) superfamily protein
FvH4_6g07700	-5.35367	1.26684e-06	3.87621e-05	2.25859	0.0339523	down		RNA ligase/cyclic nucleotide phosphodiesterase family protein
FvH4_5g20800	-1.832	1.27632e-06	3.89951e-05	7.65411	2.12626	down	BAM3,BMY8,CT-BMY	chloroplast beta-amylase
FvH4_5g03800	-2.17602	1.3936e-06	4.20253e-05	7.0616	1.4468	down	ATMRP14,MRP14	multidrug resistance-associated protein 14
FvH4_7g31940	-3.2777	1.41681e-06	4.25408e-05	4.2759	0.417251	down	ATCNGC1,CNGC1	cyclic nucleotide gated channel 1
FvH4_1g06090	-1.62835	1.47573e-06	4.3994e-05	10.3618	3.42181	down		Senescence/dehydration-associated protein-related
FvH4_6g18040	-1.71034	1.68488e-06	4.95926e-05	7.87763	2.15011	down		Haloacid dehalogenase-like hydrolase (HAD) superfamily protein
FvH4_1g08610	-1.10366	1.71021e-06	5.01967e-05	32.8447	13.4938	down		Ankyrin repeat family protein
FvH4_2g01150	-1.31613	1.7159e-06	5.0266e-05	79.9016	28.3489	down		SBP (S-ribonuclease binding protein) family protein
FvH4_2g21774	-2.00604	1.71738e-06	5.0266e-05	12.9751	3.74759	down	DMR6	2-oxoglutarate (2OG) and Fe(II)-dependent oxygenase superfamily protein
FvH4_7g28670	-1.92937	1.72715e-06	5.04811e-05	10.7414	2.58673	down	AT2301,ATGA20OX1,GA20OX1,GA5	2-oxoglutarate (2OG) and Fe(II)-dependent oxygenase superfamily protein
FvH4_4g17100	-1.84731	1.82565e-06	5.32111e-05	31.7815	8.0395	down	VAP27-2	vamp/synaptobrevin-associated protein 27-2
FvH4_2g38400	-1.21991	1.85481e-06	5.39859e-05	126.274	44.4345	down	TUB1	tubulin beta-1 chain
FvH4_2g14320	-1.84111	1.94057e-06	5.63249e-05	7.13368	1.87098	down		disease resistance protein (TIR-NBS-LRR class), putative
FvH4_1g27650	-1.20444	1.94387e-06	5.63427e-05	53.0617	20.2527	down	ARF8,ATARF8	auxin response factor 8
FvH4_1g19620	-1.11931	2.03945e-06	5.87868e-05	61.8767	24.256	down	ATNIC1,NIC1	nicotinamidase 1
FvH4_7g30080	-2.05521	2.09488e-06	6.00531e-05	5.0369	1.07634	down	ATDTX35,DTX35,FFT	detoxifying efflux carrier 35
FvH4_6g10140	-1.42435	2.18584e-06	6.23188e-05	23.1762	7.66935	down	ATOFP4,OFP4	ovate family protein 4
FvH4_6g29870	-1.46778	2.21822e-06	6.31557e-05	44.0264	13.3653	down
FvH4_3g19691	-1.20804	2.34302e-06	6.65277e-05	175.989	64.9955	down
FvH4_4g14800	-3.07863	2.35186e-06	6.65978e-05	8.07172	0.816899	down
FvH4_2g34300	-1.24213	2.43666e-06	6.87197e-05	101.835	37.5767	down		Remorin family protein
FvH4_6g53352	-3.474	2.4684e-06	6.93342e-05	9.11141	1.29494	down	AT-SO,AtSO,SOX	sulfite oxidase
FvH4_2g36400	-1.26402	2.48553e-06	6.97216e-05	15.517	5.57012	down	ATBZIP9,BZIP9,BZO2H2	basic leucine zipper 9
FvH4_7g15030	-2.665	2.51443e-06	7.04378e-05	3.04067	0.457244	down	CHY1	beta-hydroxyisobutyryl-CoA hydrolase 1
FvH4_5g06573	-2.74317	2.52072e-06	7.05195e-05	3.2692	0.435082	down	CYP71A25	cytochrome P450, family 71, subfamily A, polypeptide 25
FvH4_5g05310	-1.38558	2.59155e-06	7.24041e-05	25.4343	7.81212	down		Protein of unknown function (DUF1645)
FvH4_6g44700	-3.0804	2.66131e-06	7.41547e-05	2.33658	0.244578	down	CYP71B34	cytochrome P450, family 71, subfamily B, polypeptide 34
FvH4_2g36950	-1.0547	2.86071e-06	7.88696e-05	481.908	193.056	down	ATMYB3,MYB3	myb domain protein 3
FvH4_7g23940	-1.24364	3.12211e-06	8.58498e-05	18.2649	6.51644	down		HAD superfamily, subfamily IIIB acid phosphatase
FvH4_4g15662	-2.63438	3.33286e-06	9.06902e-05	3.86469	0.553934	down
FvH4_2g03522	-1.67609	3.38729e-06	9.16938e-05	88.0413	24.9075	down	SCPL7	serine carboxypeptidase-like 7
FvH4_4g31860	-1.67098	3.49913e-06	9.41218e-05	19.0722	5.47486	down		Disease resistance protein (CC-NBS-LRR class) family
FvH4_2g27294	-2.5885	3.57525e-06	9.59121e-05	28.1335	3.63771	down
FvH4_4g23000	-1.7136	3.72893e-06	9.97786e-05	60.3927	16.6634	down	JAS1,JAZ10,TIFY9	jasmonate-zim-domain protein 10
FvH4_6g33170	-3.6619	3.76631e-06	0.00010065	2.01325	0.163733	down	CYP90D1	cytochrome P450, family 90, subfamily D, polypeptide 1
FvH4_2g04680	-1.15582	4.00913e-06	0.00010673	356.758	134.982	down		Gibberellin-regulated family protein
FvH4_2g35410	-1.29655	4.13295e-06	0.000109746	56.8702	19.419	down		Polyketide cyclase/dehydrase and lipid transport superfamily protein
FvH4_5g24360	-1.35225	4.13915e-06	0.000109772	23.2822	8.18981	down		SH3 domain-containing protein
FvH4_4g28230	-4.56674	4.58995e-06	0.000120807	2.20594	0.0842964	down		2-oxoglutarate (2OG) and Fe(II)-dependent oxygenase superfamily protein
FvH4_6g03950	-1.5763	4.7298e-06	0.000123916	33.3946	10.1882	down		P-loop containing nucleoside triphosphate hydrolases superfamily protein
FvH4_6g08610	-1.0283	4.8064e-06	0.000125555	32.3656	13.6148	down	PAP3,PIF3,POC1	phytochrome interacting factor 3
FvH4_6g02870	-2.46039	4.94201e-06	0.000128937	18.3375	2.83546	down	ATAUX2-11,IAA4	AUX/IAA transcriptional regulator family protein
FvH4_7g02970	-1.49101	5.01927e-06	0.000130626	21.4601	6.25779	down	ARR9,ATRR4	response regulator 9
FvH4_1g01771	-1.25194	5.1912e-06	0.000134598	456.508	157.459	down
FvH4_3g07930	-1.42274	5.3673e-06	0.000138763	14.8771	4.9596	down
FvH4_5g22060	-2.11949	5.47306e-06	0.000141205	11.9118	2.0381	down	PYR1,RCAR11	Polyketide cyclase/dehydrase and lipid transport superfamily protein
FvH4_6g01320	-1.73031	5.70144e-06	0.000146195	3.20432	0.821028	down		Leucine-rich repeat protein kinase family protein
FvH4_3g11810	-1.44278	5.82769e-06	0.000148702	36.378	10.8843	down	LBD4	LOB domain-containing protein 4
FvH4_3g13940	-1.20141	5.88241e-06	0.000149733	31.2191	11.8138	down		Ca(2)-dependent phospholipid-binding protein (Copine) family
FvH4_1g16970	-4.42194	6.07929e-06	0.000153994	3.06952	0.0926756	down		C2H2 and C2HC zinc fingers superfamily protein
FvH4_5g03890	-1.62186	6.27496e-06	0.000158566	22.4335	6.78793	down		Galactose mutarotase-like superfamily protein
FvH4_4g30960	-6.58306	6.54147e-06	0.00016411	1.98408	0.0150797	down
FvH4_6g54060	-1.09628	6.79786e-06	0.000170134	18.371	7.60474	down		Esterase/lipase/thioesterase family protein
FvH4_7g30860	-1.22496	6.84557e-06	0.000171123	10.6208	4.00012	down	ATMRP14,MRP14	multidrug resistance-associated protein 14
FvH4_2g03523	-1.47228	6.94499e-06	0.00017325	32.5035	10.4939	down	scpl17	serine carboxypeptidase-like 17
FvH4_2g33410	-2.71273	7.18417e-06	0.000178732	11.9507	1.64301	down		Gibberellin-regulated family protein
FvH4_3g14116	-1.95773	7.3585e-06	0.000182201	9.21451	2.21395	down	ATKS,ATKS1,GA2,KS,KS1	Terpenoid cyclases/Protein prenyltransferases superfamily protein
FvH4_4g09490	-2.06607	7.71518e-06	0.00019028	10.5636	2.06191	down
FvH4_5g17300	-1.37386	7.72117e-06	0.00019028	187.338	64.7538	down	NMT1,PEAMT,XPL1	S-adenosyl-L-methionine-dependent methyltransferases superfamily protein
FvH4_6g49940	-1.76554	7.82354e-06	0.000192532	12.738	3.64814	down		Disease resistance protein (CC-NBS-LRR class) family
FvH4_7g18380	-2.42985	8.09719e-06	0.000198144	5.60474	0.874448	down		Protein of unknown function (DUF1635)
FvH4_2g05530	-1.36134	8.20361e-06	0.000200279	30.3233	10.4451	down		Leucine-rich repeat (LRR) family protein
FvH4_4g12350	-1.0574	8.26366e-06	0.00020151	23.0566	9.31143	down		Leucine-rich receptor-like protein kinase family protein
FvH4_4g09960	-1.57531	8.39931e-06	0.000204341	19.711	5.62635	down		Homeodomain-like transcriptional regulator
FvH4_3g03450	-1.7636	8.51233e-06	0.00020685	6.83718	1.93891	down	SD1-29	S-domain-1 29
FvH4_2g27710	-6.27032	8.94527e-06	0.000216114	4.55165	0.357457	down		Protein kinase superfamily protein
FvH4_1g11392	-2.62545	9.07086e-06	0.000218895	4.05645	0.557117	down		Heavy metal transport/detoxification superfamily protein
FvH4_3g22110	-1.92021	9.20139e-06	0.000221024	6.1182	1.4839	down	ATSGP1,SGP1	Ras-related small GTP-binding family protein
FvH4_2g17520	-2.14366	9.22409e-06	0.000221315	32.0812	6.89005	down		alpha/beta-Hydrolases superfamily protein
FvH4_5g39060	-1.30676	9.54681e-06	0.00022775	75.033	25.2749	down	AtWRKY35,MEE24,WRKY35	WRKY DNA-binding protein 35
FvH4_4g28470	-1.11726	9.92885e-06	0.000236325	24.5269	9.73985	down		Protein kinase superfamily protein
FvH4_4g19680	-1.8827	9.95438e-06	0.000236663	19.4578	4.62343	down
FvH4_3g23200	-3.03896	1.01989e-05	0.000241651	2.804	0.28184	down		Auxin-responsive family protein
FvH4_2g35720	-1.08549	1.026e-05	0.000242824	33.4173	14.0166	down		Plant protein of unknown function (DUF828) with plant pleckstrin homology-like region
FvH4_4g16170	-1.27106	1.03111e-05	0.000243758	26.306	9.22056	down		Protein of unknown function (DUF581)
FvH4_1g18530	-1.07356	1.09675e-05	0.000257238	51.5689	21.0071	down	HAT22	Homeobox-leucine zipper protein family
FvH4_4g32600	-1.3781	1.10964e-05	0.000259389	12.8957	4.41715	down	AST91,SULTR3;3	sulfate transporter 91
FvH4_3g38600	-1.51125	1.13897e-05	0.000265649	32.7156	10.3794	down		RING/U-box superfamily protein
FvH4_7g21050	-2.31036	1.14963e-05	0.000267836	48.4197	7.21309	down		Plant protein 1589 of unknown function
FvH4_2g18461	-2.94822	1.17277e-05	0.000272925	2.38022	0.322755	down	SAG101	senescence-associated gene 101
FvH4_2g05731	-1.75214	1.19193e-05	0.000277073	43.2792	11.7271	down		Plant protein of unknown function (DUF869)
FvH4_1g18650	-1.45312	1.24788e-05	0.000289437	10.1907	3.24688	down
FvH4_3g03590	-1.327	1.25298e-05	0.000290297	17.9601	6.49634	down	B120	S-locus lectin protein kinase family protein
FvH4_7g04890	-1.44081	1.29004e-05	0.000297912	6.48216	2.07007	down		DNAse I-like superfamily protein
FvH4_5g23660	-1.0932	1.33485e-05	0.000307221	46.0463	18.44	down		Homeodomain-like superfamily protein
FvH4_1g00345	-1.84946	1.33728e-05	0.000307442	8.77412	2.11167	down		Zinc-binding dehydrogenase family protein
FvH4_6g05092	-2.39218	1.37425e-05	0.000315249	9.2475	2.27378	down	SFP1	Major facilitator superfamily protein
FvH4_6g13290	-1.57366	1.38272e-05	0.00031615	5.64506	1.90047	down		2-oxoglutarate (2OG) and Fe(II)-dependent oxygenase superfamily protein
FvH4_3g44561	-1.18602	1.44615e-05	0.000329572	23.6461	9.23557	down		NB-ARC domain-containing disease resistance protein
FvH4_4g00520	-1.07979	1.56464e-05	0.000354257	15.643	6.49559	down	LUH	LEUNIG_homolog
FvH4_2g40620	-1.93618	1.66561e-05	0.000376301	6.94137	1.5372	down	ATS,KAN4	Homeodomain-like superfamily protein
FvH4_1g12490	-2.3684	1.72887e-05	0.00038766	3.41992	0.55366	down		Peroxidase superfamily protein
FvH4_5g11670	-3.08863	1.72634e-05	0.00038766	4.04268	0.451859	down		RING/U-box superfamily protein
FvH4_5g36910	-1.90546	1.72832e-05	0.00038766	34.3706	8.81198	down	EXO	Phosphate-responsive 1 family protein
FvH4_5g37690	-1.3804	1.72708e-05	0.00038766	13.4572	4.60145	down		VQ motif-containing protein
FvH4_6g15200	-2.18018	1.73081e-05	0.000387678	6.52502	1.16532	down	APX1B,APX2	ascorbate peroxidase 2
FvH4_4g23220	-1.94787	1.76657e-05	0.000395265	4.53324	1.07264	down		Histidine kinase-, DNA gyrase B-, and HSP90-like ATPase family protein
FvH4_4g09940	-2.12533	1.83475e-05	0.00041008	8.98888	1.73296	down		CAP (Cysteine-rich secretory proteins, Antigen 5, and Pathogenesis-related 1 protein) superfamily protein
FvH4_7g33140	-1.23015	1.89479e-05	0.000421698	4.16119	1.57467	down		disease resistance protein (TIR-NBS-LRR class), putative
FvH4_6g25440	-1.7675	1.89743e-05	0.000421835	14.0465	3.54408	down		Transmembrane amino acid transporter family protein
FvH4_1g06360	-1.40184	1.91916e-05	0.000426213	19.5334	6.63617	down		Peptidase M28 family protein
FvH4_1g03760	-1.33814	1.9605e-05	0.000434932	319.03	106.862	down		early nodulin-related
FvH4_1g15840	-1.51276	1.9954e-05	0.000442204	31.7017	10.3447	down
FvH4_4g28350	-1.09019	2.16976e-05	0.0004768	44.7129	18.4576	down	ATPPC4,PPC4	phosphoenolpyruvate carboxylase 4
FvH4_4g16670	-1.56093	2.26076e-05	0.000494198	4.43706	1.35851	down	PPDK	pyruvate orthophosphate dikinase
FvH4_2g05090	-1.08829	2.32162e-05	0.000505914	297.748	119.709	down	UGT84A1	UDP-Glycosyltransferase superfamily protein
FvH4_5g39140	-1.26407	2.37166e-05	0.000515207	9.6891	3.58402	down		Beta-glucosidase, GBA2 type family protein
FvH4_6g33550	-1.45796	2.36997e-05	0.000515207	6.38098	2.02895	down	AtIDD7,IDD7	indeterminate(ID)-domain 7
FvH4_2g32410	-4.2233	2.39281e-05	0.000518724	2.17062	0.103518	down	HAT9	Homeobox-leucine zipper protein family
FvH4_7g24390	-1.63505	2.62512e-05	0.000564982	15.5326	4.3377	down		Alpha/beta hydrolase related protein
FvH4_7g01230	-1.41351	2.66543e-05	0.000571892	19.7217	6.88709	down
FvH4_2g06650	-1.19948	2.74511e-05	0.000585972	13.2861	4.9778	down		P-loop containing nucleoside triphosphate hydrolases superfamily protein
FvH4_5g26600	-1.22357	2.74537e-05	0.000585972	78.2892	30.0514	down
FvH4_5g25150	-2.67224	2.75755e-05	0.000587434	3.26241	0.483631	down	CYP707A1	cytochrome P450, family 707, subfamily A, polypeptide 1
FvH4_7g33810	-1.41079	2.76513e-05	0.000588449	8.23507	2.75769	down		F-box and associated interaction domains-containing protein
FvH4_3g22740	-2.31667	2.7807e-05	0.00059056	10.7983	1.91707	down		Translation initiation factor SUI1 family protein
FvH4_6g50400	-1.42326	2.82625e-05	0.000599017	22.1645	7.0985	down		nodulin MtN21 /EamA-like transporter family protein
FvH4_5g10590	-3.04553	2.85509e-05	0.000604516	3.15117	0.299342	down	ATP5	delta subunit of Mt ATP synthase
FvH4_4g25500	-1.31936	2.92299e-05	0.000615362	16.6938	5.97259	down		MATE efflux family protein
FvH4_2g11420	-1.45222	3.0128e-05	0.000632144	30.4813	10.3603	down	ATHVA22A,HVA22A	HVA22 homologue A
FvH4_1g07041	-1.90758	3.11065e-05	0.000650714	12.3369	3.1353	down		Toll-Interleukin-Resistance (TIR) domain family protein
FvH4_1g11950	-1.4511	3.11765e-05	0.000651131	9.91519	3.16935	down	AtGH9B5,GH9B5	glycosyl hydrolase 9B5
FvH4_4g22300	-1.89236	3.12873e-05	0.000651886	3.46803	0.88046	down		ARM repeat superfamily protein
FvH4_3g03461	-1.63629	3.17858e-05	0.000661614	6.28022	1.89347	down	SD1-29	S-domain-1 29
FvH4_7g28480	-1.22707	3.30536e-05	0.000684593	19.0684	7.118	down	ATFUC1,FUC1	alpha-L-fucosidase 1
FvH4_7g07140	-1.44017	3.60818e-05	0.000741434	7.39219	2.33395	down	NPC4	non-specific phospholipase C4
FvH4_2g03550	-1.56101	3.64852e-05	0.000746785	100.896	30.8589	down	scpl6	serine carboxypeptidase-like 6
FvH4_1g15210	-1.6946	3.72393e-05	0.00076073	2.05236	0.545249	down		Disease resistance protein (CC-NBS-LRR class) family
FvH4_1g16301	-2.37131	3.85836e-05	0.000783595	3.27396	0.502833	down		HXXXD-type acyl-transferase family protein
FvH4_4g22100	-1.65594	3.89951e-05	0.000789705	5.5583	1.62303	down	ATRBOHD,RBOHD	respiratory burst oxidase homologue D
FvH4_1g16340	-1.61721	3.95125e-05	0.000799354	19.6563	5.82217	down		Plant protein of unknown function (DUF869)
FvH4_1g05040	-1.01534	3.96382e-05	0.000801121	948.671	405.212	down	AGP16,ATAGP16	arabinogalactan protein 16
FvH4_6g08611	-1.6492	4.14543e-05	0.000832192	19.0542	5.68133	down		neurofilament protein-related
FvH4_6g39571	-1.50863	4.19996e-05	0.000841522	18.1164	5.87907	down
FvH4_5g01530	-1.38017	4.2352e-05	0.000846959	11.9973	4.06294	down	SLK2	SEUSS-like 2
FvH4_2g22900	-1.57499	4.27097e-05	0.000852482	10.5043	6.31235	down		ATPase E1-E2 type family protein / haloacid dehalogenase-like hydrolase family protein
FvH4_1g07480	-1.45659	4.30645e-05	0.000858743	4.19685	1.29399	down	AtTMN7,TMN7	transmembrane nine 7
FvH4_3g38890	-1.57003	4.65118e-05	0.000921331	31.4699	9.00176	down
FvH4_6g24620	-2.60388	4.71635e-05	0.000933355	2.23201	0.319043	down	ATCKX1,CKX1	cytokinin oxidase/dehydrogenase 1
FvH4_5g36920	-1.35689	4.9073e-05	0.000967479	108.195	39.6898	down	EXO	Phosphate-responsive 1 family protein
FvH4_1g12560	-1.58682	4.96791e-05	0.000977584	9.93524	3.00181	down	XERO1	dehydrin xero 1
FvH4_5g19040	-1.25729	4.96717e-05	0.000977584	60.1696	22.1375	down		Nodulin MtN21 /EamA-like transporter family protein
FvH4_7g02633	-3.25038	4.97589e-05	0.000978233	2.12729	0.21523	down	ANN3,ANNAT3	annexin 3
FvH4_5g34210	-1.61245	5.09481e-05	0.000999731	7.74065	2.34534	down		Disease resistance protein (TIR-NBS-LRR class) family
FvH4_6g39970	-2.1959	5.18365e-05	0.00101526	15.9348	3.34104	down	LAC14	laccase 14
FvH4_3g19190	-1.75629	5.42924e-05	0.0010584	5.42246	1.38709	down
FvH4_7g30310	-1.31209	5.4677e-05	0.0010649	173.005	64.3928	down		Copper transport protein family
FvH4_3g36251	-1.7912	5.64738e-05	0.00109492	35.8852	9.64507	down		XH/XS domain-containing protein
FvH4_2g40850	-1.50133	5.75786e-05	0.00111209	7.4512	2.20577	down		C2H2 and C2HC zinc fingers superfamily protein
FvH4_5g35760	-1.85017	6.13723e-05	0.00118099	5.25346	1.34643	down	LAC14	laccase 14
FvH4_7g27355	-1.37744	6.21385e-05	0.00119146	24.4876	9.12725	down		NB-ARC domain-containing disease resistance protein
FvH4_2g38920	-1.007	6.31471e-05	0.00120626	190.015	77.5407	down	WAT1	Walls Are Thin 1
FvH4_3g11611	-2.06284	6.38878e-05	0.00121915	2.01905	0.532978	down		Glycosyl hydrolases family 31 protein
FvH4_3g23250	-1.28393	6.39388e-05	0.00121915	14.3417	5.04279	down	ATRTL2,RTL2	RNAse THREE-like protein 2
FvH4_5g06576	-2.18746	6.54967e-05	0.00124545	2.5645	0.514697	down	CYP71A25	cytochrome P450, family 71, subfamily A, polypeptide 25
FvH4_4g12240	-1.2282	6.68306e-05	0.00126506	141.819	49.6871	down		PHD finger protein
FvH4_6g04120	-1.05628	6.88281e-05	0.00129817	72.2811	29.5401	down
FvH4_2g09360	-2.59412	7.08472e-05	0.00133144	5.91268	0.96132	down		Disease resistance protein (TIR-NBS-LRR class) family
FvH4_2g24820	-1.02295	7.59528e-05	0.00141846	68.2659	28.0295	down
FvH4_3g15903	-2.30154	7.5942e-05	0.00141846	3.67138	0.787425	down		HXXXD-type acyl-transferase family protein
FvH4_3g02481	-2.89443	7.74336e-05	0.001439	3.79964	0.928347	down	BGLU47	beta-glucosidase 47
FvH4_2g29820	-1.48487	7.84249e-05	0.00145553	2.54589	0.795578	down	ABCG40,ATABCG40,ATPDR12,PDR12	pleiotropic drug resistance 12
FvH4_5g00440	-1.375	7.89052e-05	0.00146055	32.5533	11.4268	down
FvH4_6g05051	-1.57789	7.94611e-05	0.00146954	9.37074	3.09254	down		Major facilitator superfamily protein
FvH4_6g10240	-1.7557	8.26156e-05	0.00152236	7.51809	1.87081	down
FvH4_3g38450	-1.36073	8.28856e-05	0.00152431	24.7825	8.78769	down	ATVLN1,VLN1	villin-like 1
FvH4_2g03570	-1.29395	8.31882e-05	0.00152765	51.2973	18.6536	down	scpl1	serine carboxypeptidase-like 1
FvH4_4g26051	-2.86447	8.57848e-05	0.00157119	8.16917	1.01778	down	MENG	S-adenosyl-L-methionine-dependent methyltransferases superfamily protein
FvH4_6g24670	-4.3481	8.6576e-05	0.00158153	5.48157	0.334254	down		Pathogenesis-related thaumatin superfamily protein
FvH4_1g08390	-3.95954	8.8537e-05	0.00160751	2.07196	0.161431	down	ATMYB123,ATTT2,MYB123,TT2	Duplicated homeodomain-like superfamily protein
FvH4_5g30710	-1.02635	8.87009e-05	0.00160909	36.4556	15.7116	down	ATBXL4,XYL4	beta-D-xylosidase 4
FvH4_4g26070	-1.78834	8.89949e-05	0.00161163	4.66776	1.24363	down	CRK3	cysteine-rich RLK (RECEPTOR-like protein kinase) 3
FvH4_3g07680	-1.53469	9.04241e-05	0.00163609	8.62005	2.68047	down		Protein of unknown function (DUF688)
FvH4_3g17550	-1.21109	9.06592e-05	0.00163892	84.2317	32.3211	down	AtUGT85A3,UGT85A3	UDP-glucosyl transferase 85A3
FvH4_6g48770	-1.12301	9.08628e-05	0.00164118	17.7401	6.9147	down		HXXXD-type acyl-transferase family protein
FvH4_7g31640	-1.8	9.37654e-05	0.00168778	5.23885	1.30178	down		Phosphatidylinositol 3- and 4-kinase ;Ubiquitin family protein
FvH4_2g16600	-1.4606	9.635e-05	0.00173132	6.71379	2.19676	down	PUB15	Plant U-Box 15
FvH4_4g07930	-1.19659	9.67743e-05	0.00173671	60.7101	23.3951	down	scpl18	serine carboxypeptidase-like 18
FvH4_7g32470	-1.8832	9.87065e-05	0.0017691	2.23104	0.634773	down		disease resistance protein (TIR-NBS-LRR class), putative
FvH4_3g08900	-1.57412	0.000100015	0.00178948	9.3121	2.80984	down	OBP4	OBF binding protein 4
FvH4_3g36252	-1.71731	0.000101869	0.00181953	31.9571	8.96399	down		XH/XS domain-containing protein
FvH4_2g28370	-1.08539	0.000104827	0.00186917	23.3263	9.3586	down
FvH4_1g26980	-1.31082	0.000107544	0.00190948	8.85566	3.1015	down	ATWRKY23,WRKY23	WRKY DNA-binding protein 23
FvH4_1g00410	-1.8329	0.000108023	0.00191498	5.78813	1.47367	down		UDP-Glycosyltransferase superfamily protein
FvH4_3g13530	-1.15563	0.000111045	0.00195854	35.3607	13.9326	down		CTP synthase family protein
FvH4_5g03300	-2.86039	0.000113777	0.00200144	2.95494	0.346313	down		Protein of unknown function (DUF567)
FvH4_3g05310	-1.28793	0.000123062	0.00213957	28.3271	9.15338	down	AtRLP29,RLP29	receptor like protein 29
FvH4_3g07120	-1.34817	0.000124294	0.00215739	44.3477	38.9484	down	ATSYP132,SYP132	syntaxin of plants 132
FvH4_2g16180	-2.09741	0.00012535	0.0021703	9.05681	1.89142	down	anac036,NAC036	NAC domain containing protein 36
FvH4_3g38990	-1.21807	0.000130795	0.00224967	39.1524	15.3494	down		Protein phosphatase 2C family protein
FvH4_5g39610	-1.63346	0.000132835	0.00228289	33.3231	9.61407	down
FvH4_3g07044	-1.55579	0.000138564	0.00235999	29.4554	9.35681	down	RKF1	receptor-like kinase in flowers 1
FvH4_1g24510	-1.19325	0.000139862	0.00237585	9.59383	3.54766	down	ATHDA14,hda14	histone deacetylase 14
FvH4_5g15070	-1.81875	0.000143515	0.00242849	3.16015	0.759376	down		Disease resistance protein (TIR-NBS-LRR class) family
FvH4_6g05060	-1.40106	0.000145696	0.00245864	9.05775	3.1197	down	ERD6	Major facilitator superfamily protein
FvH4_7g31070	-1.78245	0.000148601	0.00249836	26.8381	6.48989	down	TRY	Homeodomain-like superfamily protein
FvH4_1g12090	-1.58362	0.000152828	0.00256119	22.1372	6.62521	down		Lactoylglutathione lyase / glyoxalase I family protein
FvH4_2g16940	-2.38587	0.000156826	0.00261978	3.26808	0.556554	down	XCP1	xylem cysteine peptidase 1
FvH4_6g06090	-1.71265	0.000157308	0.00262365	7.47048	2.14763	down	ATLOX1,LOX1	lipoxygenase 1
FvH4_1g09090	-1.2765	0.000158755	0.00264567	53.0779	19.5003	down		Protein of unknown function (DUF581)
FvH4_4g11660	-1.62674	0.00016699	0.00276745	3.8954	1.09745	down	ATEXT3,EXT3,RSH	extensin 3
FvH4_4g00822	-1.38544	0.00016715	0.0027679	71.1489	24.8768	down		Kinase interacting (KIP1-like) family protein
FvH4_5g18490	-1.34901	0.000167762	0.00277584	34.3229	12.2585	down		GRAM domain-containing protein / ABA-responsive protein-related
FvH4_7g32740	-2.06892	0.000170303	0.0028112	4.07071	0.909505	down		disease resistance protein (TIR-NBS-LRR class), putative
FvH4_3g23420	-1.32856	0.000172414	0.0028371	4.36084	1.53781	down	BGLU11	beta glucosidase 11
FvH4_1g09701	-1.55645	0.000173101	0.00284616	16.0448	5.06546	down
FvH4_3g21121	-2.82641	0.000176704	0.00289628	9.0353	0.937494	down
FvH4_2g12270	-1.5403	0.000181793	0.00297736	15.643	4.57634	down
FvH4_2g37540	-1.08395	0.000186443	0.00303611	20.977	8.73076	down		O-fucosyltransferase family protein
FvH4_1g16210	-1.04031	0.000191336	0.00309485	19.6442	8.54172	down		Protein kinase superfamily protein
FvH4_6g04460	-2.25944	0.000195652	0.00315246	2.63063	0.515706	down
FvH4_7g07610	-1.33329	0.000196991	0.00317159	20.682	7.47178	down	REM39,VRN1	AP2/B3-like transcriptional factor family protein
FvH4_5g35250	-1.28774	0.000201634	0.00323886	37.082	13.592	down		zinc ion binding;DNA binding
FvH4_4g06480	-1.39573	0.000202079	0.00324101	29.0696	10.1405	down	scpl3	serine carboxypeptidase-like 3
FvH4_2g30780	-1.07825	0.00020266	0.00324535	19.1597	8.10393	down	ATDCL3,DCL3	dicer-like 3
FvH4_5g10980	-1.78403	0.000203219	0.00324694	11.6148	2.98373	down
FvH4_7g14900	-1.05794	0.000204682	0.00326744	86.192	35.3496	down	BRH1	brassinosteroid-responsive RING-H2
FvH4_5g04970	-1.08256	0.000210436	0.0033519	63.0614	26.4197	down		DCD (Development and Cell Death) domain protein
FvH4_7g10520	-1.51149	0.000215256	0.00341565	9.06696	2.89384	down		Disease resistance protein (TIR-NBS-LRR class) family
FvH4_5g14100	-1.32116	0.000216446	0.00343002	105.904	34.2584	down
FvH4_3g34440	-1.2466	0.00021782	0.00344849	41.8315	15.9626	down		P-loop containing nucleoside triphosphate hydrolases superfamily protein
FvH4_6g53500	-1.29002	0.000221161	0.00348554	17.675	6.55108	down	ATPOT1,AtPOT1a	Nucleic acid-binding, OB-fold-like protein
FvH4_4g03570	-1.04616	0.000224673	0.00353024	92.0848	37.3649	down	AT-PHH1,ATCRY2,CRY2,FHA,PHH1	cryptochrome 2
FvH4_3g24320	-1.79345	0.000224946	0.00353188	3.61144	0.922347	down		GDSL-like Lipase/Acylhydrolase superfamily protein
FvH4_6g20510	-1.90651	0.000235361	0.00367057	4.5657	1.17194	down	ATHAP2B,HAP2B,NF-YA2,UNE8	nuclear factor Y, subunit A2
FvH4_3g34270	-1.38923	0.000235877	0.00367105	7.62531	2.6497	down	JK224,NPH1,PHOT1,RPT1	phototropin 1
FvH4_5g21990	-1.29487	0.000239708	0.00372447	14.628	5.201	down
FvH4_4g29930	-1.2641	0.000240176	0.00372897	6.22308	2.34417	down		NB-ARC domain-containing disease resistance protein
FvH4_1g13370	-1.1341	0.000246568	0.00381405	765.888	323.934	down
FvH4_2g33550	-1.62249	0.000247984	0.00383028	29.4647	7.54507	down	CLE26	CLAVATA3/ESR-RELATED 26
FvH4_4g00100	-1.30225	0.000253278	0.00389764	27.1669	9.56512	down	AtTHO7,THO7	Tho complex subunit 7/Mft1p
FvH4_3g22070	-1.40436	0.000265445	0.00405799	20.3724	7.01109	down	MAPKKK19	mitogen-activated protein kinase kinase kinase 19
FvH4_6g04470	-2.76937	0.000265369	0.00405799	14.046	2.10253	down	EMB3004,MEE32	dehydroquinate dehydratase, putative / shikimate dehydrogenase, putative
FvH4_5g14470	-1.05335	0.000269253	0.00410719	22.6022	9.64194	down	IBS1	Protein kinase superfamily protein
FvH4_2g19000	-1.32244	0.000269527	0.00410837	18.0762	6.70733	down		Protein of unknown function, DUF593
FvH4_7g01563	-1.17701	0.000276687	0.00419069	13.8941	5.45152	down		NAD(P)-binding Rossmann-fold superfamily protein
FvH4_3g36253	-1.62025	0.000292443	0.00439358	21.6728	6.52675	down		XH/XS domain-containing protein
FvH4_6g48240	-1.63866	0.00029839	0.00445729	9.65984	2.6521	down		Calcium-binding EF-hand family protein
FvH4_2g05900	-1.11575	0.000306232	0.00455289	16.0694	6.83696	down	ABF4,AREB2	ABRE binding factor 4
FvH4_4g02161	-1.7611	0.000306381	0.00455289	17.7246	5.04918	down		acylaminoacyl-peptidase-related
FvH4_3g10700	-1.22608	0.000309372	0.00458529	36.5756	13.9404	down		ethylene-responsive nuclear protein / ethylene-regulated nuclear protein (ERT2)
FvH4_6g36960	-1.45443	0.000311311	0.00461076	36.7313	12.117	down	LPAT2	lysophosphatidyl acyltransferase 2
FvH4_3g43660	-1.32864	0.000311601	0.00461178	6.9812	2.50016	down		NB-ARC domain-containing disease resistance protein
FvH4_4g21073	-5.37496	0.000317823	0.00469625	3.06048	0.0560104	down
FvH4_7g23620	-1.00548	0.000327737	0.00481386	18.4767	8.3065	down	ATGC1,GC1	guanylyl cyclase 1
FvH4_5g15780	-1.20639	0.000332474	0.00485877	17.4348	6.78299	down		zinc ion binding
FvH4_4g14090	-1.31359	0.000335548	0.00490026	38.0273	18.3657	down
FvH4_1g15700	-1.47591	0.000336847	0.00491238	13.6714	4.56067	down		Protein of unknown function, DUF547
FvH4_1g16620	-1.11631	0.000341416	0.00496514	5.07958	2.06238	down		disease resistance protein (TIR-NBS-LRR class)
FvH4_2g31980	-1.57378	0.000342269	0.00497408	4.63131	1.48356	down	ATGLR2.7,GLR2.7	glutamate receptor 2.7
FvH4_7g26071	-1.04899	0.000343281	0.00498186	18.6957	8.13588	down		Disease resistance protein (TIR-NBS-LRR class) family
FvH4_5g25350	-1.56723	0.000351373	0.00507112	5.7585	1.88815	down		Pentatricopeptide repeat (PPR) superfamily protein
FvH4_5g19230	-1.38552	0.000354996	0.00511634	14.1125	5.03068	down	ATMSH4,MSH4	MUTS-like protein 4
FvH4_c6g00070	-1.10823	0.000357436	0.00514088	8.59979	3.29047	down	AtIDD2,IDD2	indeterminate(ID)-domain 2
FvH4_2g12960	-1.02338	0.000369993	0.00529235	9.23039	4.00696	down		DNAse I-like superfamily protein
FvH4_1g19480	-1.1224	0.000371307	0.00530026	14.4973	5.9813	down		UDP-Glycosyltransferase superfamily protein
FvH4_7g22630	-1.68728	0.000380671	0.00541911	7.924	2.27977	down	CYP71A22	cytochrome P450, family 71, subfamily A, polypeptide 22
FvH4_7g34070	-2.13954	0.000382665	0.00544379	2.55821	0.496472	down	BPA1	binding partner of acd11 1
FvH4_3g45301	-2.4672	0.000383957	0.00545846	3.82279	0.53997	down		RNA-binding KH domain-containing protein
FvH4_7g29830	-1.55951	0.000386253	0.00547881	7.28241	2.18076	down
FvH4_6g09120	-2.00343	0.000387721	0.00549328	5.69026	1.29511	down		Protein of unknown function (DUF567)
FvH4_3g44670	-1.38558	0.000401402	0.00566791	2.46232	0.894104	down		NB-ARC domain-containing disease resistance protein
FvH4_2g09350	-1.84485	0.000404658	0.00570232	3.66535	0.9215	down		Disease resistance protein (TIR-NBS-LRR class) family
FvH4_3g11500	-3.51925	0.000411261	0.00577979	4.44015	0.41466	down
FvH4_6g43530	-1.30463	0.000412158	0.00578461	28.9465	10.8211	down		Zinc finger C-x8-C-x5-C-x3-H type family protein
FvH4_6g15060	-1.06965	0.000418436	0.00585698	44.2203	19.2655	down	APRR7,PRR7	pseudo-response regulator 7
FvH4_6g16430	-3.38459	0.000422427	0.00590493	3.82347	0.318953	down
FvH4_3g20810	-2.09788	0.000423061	0.00590985	7.28741	1.36197	down
FvH4_3g00850	-1.86376	0.000426287	0.00595094	24.5558	6.43128	down	XTH23,XTR6	xyloglucan endotransglycosylase 6
FvH4_5g21720	-1.50531	0.000431921	0.00602153	2.75386	0.875548	down	PIRL4	plant intracellular ras group-related LRR 4
FvH4_2g00490	-1.16073	0.000433175	0.00603097	13.4833	5.03149	down	UREF	urease accessory protein F
FvH4_3g28370	-4.65967	0.00043352	0.00603176	2.7677	0.2197	down		Glycosyl hydrolase superfamily protein
FvH4_7g09310	-3.60827	0.000435836	0.0060519	3.31867	0.285668	down		Ankyrin repeat family protein
FvH4_6g49320	-1.92776	0.000436442	0.00605227	23.1918	5.69154	down
FvH4_3g19500	-1.65298	0.000445289	0.00615046	15.6088	3.85469	down	DEG5,DEGP5,HHOA	DEGP protease 5
FvH4_1g16990	-1.14429	0.000448577	0.00618362	32.4855	12.7165	down		RING/U-box superfamily protein
FvH4_4g09010	-1.58047	0.000454278	0.00624984	9.59609	3.93986	down
FvH4_6g25550	-1.17839	0.000455766	0.00625509	25.5751	10.5503	down
FvH4_7g28550	-2.11163	0.000459726	0.00629166	1.00479	0.214245	down		Disease resistance protein (TIR-NBS-LRR class) family
FvH4_2g33452	-1.45212	0.000461158	0.00629888	10.9152	3.64693	down		RING/U-box superfamily protein
FvH4_6g51100	-1.28789	0.000485679	0.00657791	4.39269	1.65613	down	MER3,RCK	ATP binding;ATP-dependent helicases;DNA helicases
FvH4_3g24830	-1.22144	0.000488613	0.00660186	5.72714	2.06836	down	bZIP21,TGA9	bZIP transcription factor family protein
FvH4_3g28450	-1.66303	0.000490452	0.00661256	2.2165	0.63974	down
FvH4_2g06540	-1.3512	0.000491355	0.00662046	18.3204	6.35971	down		alpha/beta-Hydrolases superfamily protein
FvH4_3g43883	-1.35189	0.00049453	0.00665259	29.5311	10.7575	down		Toll-Interleukin-Resistance (TIR) domain family protein
FvH4_7g13190	-1.34961	0.000501844	0.00671417	4.69716	1.61238	down		basic helix-loop-helix (bHLH) DNA-binding superfamily protein
FvH4_2g19790	-1.07608	0.000517258	0.00688513	23.489	9.7296	down	PIF1,PIL5	phytochrome interacting factor 3-like 5
FvH4_5g04940	-1.00847	0.000524473	0.00697229	134.73	55.5712	down	KELP	transcriptional coactivator p15 (PC4) family protein (KELP)
FvH4_2g23170	-1.30374	0.000540615	0.00715721	24.7694	9.0952	down		DNAse I-like superfamily protein
FvH4_3g06810	-1.23068	0.000543449	0.00717889	13.4427	5.2312	down		Leucine-rich repeat transmembrane protein kinase
FvH4_6g29130	-1.07848	0.000549982	0.00724686	29.972	12.3196	down		Sterile alpha motif (SAM) domain-containing protein
FvH4_3g04650	-1.35021	0.000552519	0.00726654	16.9485	6.07788	down		disease resistance protein (TIR class), putative
FvH4_2g32640	-1.0166	0.000555801	0.00730052	116.542	51.8012	down	ANT,CKC,CKC1,DRG	Integrase-type DNA-binding superfamily protein
FvH4_7g26140	-1.33964	0.000557393	0.00731567	11.3779	4.3102	down
FvH4_1g06290	-1.22796	0.000559276	0.00733234	9.44482	3.2209	down		MATE efflux family protein
FvH4_4g27840	-1.39392	0.000561719	0.00735975	41.0355	14.3512	down
FvH4_3g13370	-1.43567	0.000565132	0.00739056	18.8463	6.42082	down	ATPCAP1,PCAP1	plasma-membrane associated cation-binding protein 1
FvH4_6g13322	-1.14834	0.000575729	0.00751504	7.07212	2.78605	down		2-oxoglutarate (2OG) and Fe(II)-dependent oxygenase superfamily protein
FvH4_2g16810	-1.17346	0.000577803	0.00753603	7.39453	2.98883	down	ATGLR3.2,ATGLUR2,GLR3.2,GLUR2	glutamate receptor 2
FvH4_5g10560	-1.28956	0.000590609	0.00768049	98.6902	32.4836	down
FvH4_5g26040	-1.2837	0.000594311	0.00771423	11.763	4.36291	down
FvH4_2g13090	-1.30736	0.000596275	0.00772054	9.48129	3.58707	down		Protein kinase superfamily protein
FvH4_5g37420	-1.17073	0.000595782	0.00772054	26.4133	10.7952	down	MCM10	minichromosome maintenance 10
FvH4_6g20910	-1.35922	0.000596177	0.00772054	13.9895	5.07998	down
FvH4_7g11160	-1.27027	0.000595953	0.00772054	36.5063	13.8701	down		disease resistance protein (TIR-NBS-LRR class), putative
FvH4_1g19281	-1.50023	0.00059802	0.00773632	4.39089	1.40661	down	ATCAD8,CAD-B2,ELI3,ELI3-2	elicitor-activated gene 3-2
FvH4_3g04020	-1.57473	0.000599958	0.00773892	51.4126	16.7437	down		F-box family protein
FvH4_2g02431	-1.67512	0.000613175	0.00787932	12.7026	3.69898	down	ADL6,DRP2A	dynamin-like protein 6
FvH4_4g15601	-1.21852	0.000621401	0.0079563	28.9733	11.4087	down
FvH4_6g32030	-1.30062	0.000624706	0.00798967	7.32269	2.39049	down	TINY2	Integrase-type DNA-binding superfamily protein
FvH4_4g09083	-2.29105	0.000629387	0.00802987	3.94414	0.598926	down
FvH4_3g44671	-4.36727	0.000639644	0.00814085	2.44531	0.0962463	down		F-box and associated interaction domains-containing protein
FvH4_4g13500	-1.49847	0.000644601	0.00819292	3.33521	1.07098	down		Ankyrin repeat family protein
FvH4_6g29880	-1.05964	0.000652989	0.00827541	15.3595	6.15181	down		HSP20-like chaperones superfamily protein
FvH4_1g12660	-1.66801	0.000666647	0.00842599	8.6177	2.97635	down		UDP-Glycosyltransferase superfamily protein
FvH4_6g19450	-1.08314	0.000669054	0.00844317	12.6202	5.20815	down	ATAN11,LWD1	Transducin/WD40 repeat-like superfamily protein
FvH4_7g22120	-1.07528	0.000682236	0.00857844	23.7034	9.8083	down
FvH4_4g11960	-1.19556	0.000693367	0.00870269	9.62222	3.57865	down		UDP-Glycosyltransferase superfamily protein
FvH4_2g09420	-1.4015	0.000695584	0.00872528	6.67992	2.22737	down		Sec14p-like phosphatidylinositol transfer family protein
FvH4_2g19870	-1.01035	0.000713341	0.00888403	17.417	7.27627	down		RNI-like superfamily protein
FvH4_4g16070	-1.0273	0.000719392	0.0089434	7.41122	3.07238	down		Serine/threonine-protein kinase WNK (With No Lysine)-related
FvH4_4g12760	-1.02199	0.000720078	0.00894661	12.6274	5.34609	down		basic helix-loop-helix (bHLH) DNA-binding superfamily protein
FvH4_1g00750	-1.31306	0.000726358	0.00901391	14.8094	4.90186	down
FvH4_7g21500	-1.16737	0.000741505	0.00917464	4.9418	1.981	down	THE1	protein kinase family protein
FvH4_3g03200	-1.47534	0.000765824	0.00942531	3.39788	1.06231	down		basic helix-loop-helix (bHLH) DNA-binding superfamily protein
FvH4_7g14290	-1.25758	0.000766496	0.00942804	9.54052	3.66457	down		Protein of unknown function (DUF3741)
FvH4_3g25070	-1.45029	0.000770705	0.00946866	5.33198	1.78721	down		Ankyrin repeat family protein
FvH4_2g06300	-1.32718	0.000773613	0.00948766	25.1565	9.21168	down		AP2/B3-like transcriptional factor family protein
FvH4_3g43820	-1.28305	0.000782557	0.0095861	15.1638	5.84775	down
FvH4_5g03180	-1.08115	0.000788177	0.00962672	31.5693	12.0047	down
FvH4_4g34051	-1.64036	0.00079945	0.00973029	3.27331	0.979492	down		Protein of unknown function, DUF593
FvH4_7g26600	-2.85887	0.000800986	0.00974331	4.03877	0.590674	down		disease resistance family protein / LRR family protein
FvH4_6g05421	-3.74324	0.000804471	0.00976865	4.58071	0.29649	down
FvH4_3g36370	-1.22721	0.000811567	0.00982057	14.9239	5.73595	down
FvH4_6g17080	-1.52124	0.000810632	0.00982057	5.91973	1.76799	down	UGT73D1	UDP-glucosyl transferase 73D1
FvH4_5g18160	-1.5586	0.000833652	0.0100587	3.0362	0.929202	down	ATSUS6,SUS6	sucrose synthase 6
FvH4_3g23080	-1.88341	0.000838176	0.0101074	9.85356	2.83061	down		F-box family protein with a domain of unknown function (DUF295)
FvH4_1g08030	-1.23628	0.000859616	0.0103302	19.4443	6.89704	down	ATCFIM-25,CFIM-25	homolog of CFIM-25
FvH4_2g12830	-1.21615	0.000870159	0.0104329	11.1773	4.30817	down	LAC14	laccase 14
FvH4_1g23542	-1.16165	0.000877453	0.0104963	9.61948	3.90138	down	ADG1,APS1	ADP glucose pyrophosphorylase 1
FvH4_4g31970	-1.02597	0.000886013	0.0105866	16.9638	7.48914	down	PLP,PLPA,PLPB,PLPC	PAS/LOV protein B
FvH4_6g00230	-1.14339	0.000904017	0.010777	49.1678	20.3118	down	AtCRT3,CRT3,EBS2,PSL1	calreticulin 3
FvH4_4g35890	-1.19196	0.000908812	0.0108219	12.2387	4.95602	down	ATNHX7,ATSOS1,SOS1	sodium proton exchanger, putative (NHX7) (SOS1)
FvH4_2g10870	-5.2653	0.000910254	0.0108267	1.89255	0.0453979	down		SAUR-like auxin-responsive protein family
FvH4_5g38692	-1.53591	0.000911976	0.0108348	20.4069	7.2498	down
FvH4_3g43881	-1.36764	0.000918674	0.010902	18.8043	6.56266	down
FvH4_4g33550	-1.20588	0.000920747	0.0109204	7.67651	2.83371	down		UDP-3-O-acyl N-acetylglycosamine deacetylase family protein
FvH4_7g22640	-1.02376	0.000924305	0.0109564	26.7926	11.9611	down	NIK1	NSP-interacting kinase 1
FvH4_2g12820	-1.24161	0.000934689	0.0110607	19.6579	7.96197	down	LAC14	laccase 14
FvH4_5g24960	-1.64502	0.000944468	0.0111637	8.36653	2.47845	down
FvH4_5g03781	-1.78922	0.000950705	0.0112184	3.26152	0.890058	down	ATMRP14,MRP14	multidrug resistance-associated protein 14
FvH4_4g06960	-1.20569	0.000955119	0.0112578	8.33268	2.88836	down		F-box family protein
FvH4_4g30990	-1.15177	0.000956457	0.0112672	24.7523	10.0536	down		Arabinanase/levansucrase/invertase
FvH4_1g17530	-1.44316	0.000967696	0.011374	8.4104	2.85159	down	CYCD5;1	cyclin d5;1
FvH4_5g26330	-1.54233	0.000981029	0.0114919	6.09079	2.06919	down		Auxin efflux carrier family protein
FvH4_7g25530	-1.31275	0.00098342	0.0115135	143.873	51.304	down		Hypoxia-responsive family protein
FvH4_3g39130	-1.46411	0.000987512	0.0115549	5.01988	1.59427	down	ATBAG4,BAG4	BCL-2-associated athanogene 4
FvH4_4g01350	-1.212	0.000997318	0.0116481	13.4318	5.06882	down	ATB2	NAD(P)-linked oxidoreductase superfamily protein
FvH4_2g09820	-1.00809	0.00100208	0.0116926	36.8885	16.532	down	BGAL3	beta-galactosidase 3
FvH4_1g15090	-1.14985	0.00100498	0.01171	9.93476	4.14645	down		Disease resistance protein (CC-NBS-LRR class) family
FvH4_3g02290	-1.13557	0.00101236	0.0117731	4.9854	2.0132	down		NB-ARC domain-containing disease resistance protein
FvH4_5g26230	-1.17198	0.0010118	0.0117731	22.7336	8.05004	down	AHL29,SOB3	Predicted AT-hook DNA-binding family protein
FvH4_5g27140	-1.12925	0.00101434	0.0117896	46.6973	19.2054	down	ATFRO7,FRO7	ferric reduction oxidase 7
FvH4_3g06190	-1.179	0.00102228	0.0118687	14.1911	5.50475	down		O-acetyltransferase family protein
FvH4_5g07361	-1.2222	0.00105232	0.0121365	17.7286	6.9208	down	EMB2423	embryo defective 2423
FvH4_4g35030	-1.36232	0.00106524	0.0122315	9.76014	3.44377	down		DNA polymerase lambda (POLL)
FvH4_5g38691	-1.36255	0.00107315	0.0123156	53.6122	18.984	down
FvH4_6g51110	-1.02848	0.00107388	0.0123172	66.2795	29.5729	down		Histidine kinase-, DNA gyrase B-, and HSP90-like ATPase family protein
FvH4_7g27643	-1.4706	0.00107536	0.0123206	25.6203	8.70605	down	ATSMC2	Structural maintenance of chromosomes (SMC) family protein
FvH4_3g38530	-2.10204	0.00107706	0.0123333	1.73505	0.316878	down	ATCAX1,CAX1,RCI4	cation exchanger 1
FvH4_6g39983	-1.83916	0.00109342	0.0124797	6.83027	1.8211	down	LAC14	laccase 14
FvH4_1g29930	-1.53554	0.0010988	0.0125273	33.2694	10.6455	down		ARM repeat superfamily protein
FvH4_2g06040	-1.06544	0.0011033	0.0125582	29.862	13.9432	down
FvH4_3g44060	-1.75932	0.00110673	0.0125904	13.6016	3.6819	down	RFL1	RPS5-like 1
FvH4_2g30860	-1.007	0.00112011	0.0127169	41.0847	18.6407	down	ATGPA1,GP,ALPHA,1,GPA1	G protein alpha subunit 1
FvH4_7g33260	-1.15175	0.00112029	0.0127169	9.50824	3.88454	down		DNA mismatch repair protein MutS, type 2
FvH4_7g11151	-1.30462	0.00113611	0.0128685	36.7126	13.7121	down		Disease resistance protein (TIR-NBS-LRR class) family
FvH4_1g23570	-1.14504	0.00114686	0.0129684	14.0316	5.92789	down		Plastid-lipid associated protein PAP / fibrillin family protein
FvH4_6g46000	-2.58036	0.00117538	0.0132202	4.30129	0.810389	down	ATBZIP42,bZIP42	basic leucine-zipper 42
FvH4_6g33540	-1.02985	0.00117801	0.0132427	14.429	6.27609	down	BGAL17	beta-galactosidase 17
FvH4_3g30430	-1.21207	0.00118256	0.0132795	50.1355	20.235	down	ACL5	S-adenosyl-L-methionine-dependent methyltransferases superfamily protein
FvH4_5g27250	-1.86692	0.00119888	0.0134195	5.63247	1.2698	down		Chitinase family protein
FvH4_7g22651	-4.93332	0.00119986	0.0134232	3.22693	0.150079	down	CYP71A23	cytochrome P450, family 71, subfamily A, polypeptide 23
FvH4_7g18210	-1.5741	0.00120431	0.0134515	5.21807	2.86553	down	anac028,NAC028	NAC domain containing protein 28
FvH4_6g04150	-1.25325	0.0012054	0.0134564	11.4227	4.5058	down
FvH4_1g22100	-1.28042	0.00123383	0.0137444	8.29044	3.02084	down		bacterial transferase hexapeptide repeat-containing protein
FvH4_1g08160	-1.15951	0.00124157	0.0138012	75.8725	30.7919	down	ATHAP2C,HAP2C,NF-YA3	nuclear factor Y, subunit A3
FvH4_3g44000	-1.05377	0.00125121	0.0138992	16.9913	7.38707	down		actin binding
FvH4_2g04940	-1.18755	0.00127283	0.0140962	31.8424	12.2654	down	ACLA-2	ATP-citrate lyase A-2
FvH4_3g06640	-2.49525	0.00127232	0.0140962	5.76703	1.34345	down		myosin heavy chain-related
FvH4_7g01120	-1.35535	0.00128716	0.0142117	5.94081	2.15065	down	ATHAP2A,EMB2220,HAP2A,NF-YA1	nuclear factor Y, subunit A1
FvH4_3g23410	-1.08962	0.00129188	0.0142543	10.0144	4.01871	down		O-Glycosyl hydrolases family 17 protein
FvH4_3g02590	-1.23301	0.00129698	0.0142804	111.24	42.5365	down
FvH4_1g16211	-1.28484	0.00129866	0.0142839	8.89791	3.43193	down		S-locus lectin protein kinase family protein
FvH4_1g20240	-1.82902	0.00131714	0.0144113	15.0729	3.5594	down
FvH4_4g13190	-2.25398	0.00132016	0.0144291	7.81011	1.42056	down	RALFL32	ralf-like 32
FvH4_3g34940	-1.41352	0.0013315	0.0145152	12.4213	3.99633	down	GAMMA-TIP,GAMMA-TIP1,TIP1;1	gamma tonoplast intrinsic protein
FvH4_6g10130	-2.23619	0.00135124	0.0146768	1.88556	0.36828	down		2-oxoglutarate (2OG) and Fe(II)-dependent oxygenase superfamily protein
FvH4_2g18970	-1.17725	0.00136662	0.0148054	11.5447	4.61991	down		Sec14p-like phosphatidylinositol transfer family protein
FvH4_5g01820	-4.4044	0.00137172	0.0148452	2.20413	0.0574019	down	ATOSM34,OSM34	osmotin 34
FvH4_6g50162	-1.80869	0.0013762	0.014886	3.10535	0.803492	down	SAG101	senescence-associated gene 101
FvH4_6g42550	-1.07653	0.00137902	0.0149012	9.77325	4.25662	down		RNA-binding KH domain-containing protein
FvH4_3g15430	-1.41979	0.00138151	0.0149203	2.71874	0.998768	down		Leucine-rich repeat transmembrane protein kinase
FvH4_6g38782	-1.3281	0.0013839	0.0149306	13.8759	5.10029	down		Protein of unknown function (DUF3414)
FvH4_1g13031	-2.6554	0.00139143	0.0149964	2.44203	0.321786	down
FvH4_3g29140	-1.10831	0.0013954	0.0150189	138.37	57.9696	down
FvH4_6g08442	-1.10923	0.00139899	0.0150469	4.80128	1.88537	down		Pyridoxal phosphate (PLP)-dependent transferases superfamily protein
FvH4_3g23510	-2.0845	0.00141566	0.0151949	16.6755	3.20629	down
FvH4_4g08670	-1.17131	0.0014177	0.0151955	31.5096	12.0245	down	BGT,GCN5,HAC3,HAG01,HAG1,HAT1	histone acetyltransferase of the GNAT family 1
FvH4_3g33900	-1.03526	0.00143264	0.0153064	34.3404	14.933	down	ATMAPK3,ATMPK3,MPK3	mitogen-activated protein kinase 3
FvH4_7g08800	-1.42476	0.00143758	0.0153435	24.1292	9.5953	down
FvH4_2g15770	-1.06405	0.0014449	0.015405	11.8839	5.12517	down	ATATR,ATR,ATRAD3	Ataxia telangiectasia-mutated and RAD3-related
FvH4_6g12160	-2.02522	0.00144765	0.0154116	4.57531	0.993294	down		Cysteine proteinases superfamily protein
FvH4_6g28350	-2.68372	0.00145953	0.0155158	5.85691	0.887111	down
FvH4_6g42440	-1.11113	0.00148091	0.0157177	5.16441	2.03453	down	AtGH9B8,GH9B8	glycosyl hydrolase 9B8
FvH4_6g40570	-1.1134	0.00151645	0.0159974	10.3333	4.33147	down		Protein kinase superfamily protein
FvH4_6g45770	-1.4429	0.00155359	0.016315	4.37983	1.86925	down
FvH4_1g02151	-1.91228	0.00155673	0.0163316	2.29866	0.631822	down		2-oxoglutarate (2OG) and Fe(II)-dependent oxygenase superfamily protein
FvH4_4g19940	-1.15284	0.00155673	0.0163316	27.8018	10.7882	down
FvH4_7g09280	-1.89213	0.00156491	0.0163845	2.4257	0.770204	down		NB-ARC domain-containing disease resistance protein
FvH4_2g06620	-1.09982	0.00157972	0.0164873	29.0006	11.4045	down		alpha/beta-Hydrolases superfamily protein
FvH4_7g02401	-2.90151	0.00159226	0.016563	2.36891	0.274679	down		LRR and NB-ARC domains-containing disease resistance protein
FvH4_2g02354	-1.23734	0.00161493	0.016744	57.2032	22.2791	down	ADL6,DRP2A	dynamin-like protein 6
FvH4_3g00840	-1.89897	0.00161527	0.016744	6.72634	1.65028	down	XTH23,XTR6	xyloglucan endotransglycosylase 6
FvH4_6g38570	-1.22942	0.00161381	0.016744	12.3017	4.46263	down
FvH4_5g37213	-1.32861	0.00162783	0.0168491	12.4281	4.46807	down		Plant transposase (Ptta/En/Spm family)
FvH4_5g35401	-1.37941	0.00166322	0.0171644	20.1158	6.55963	down	AGL22,SVP	K-box region and MADS-box transcription factor family protein
FvH4_4g35150	-1.70121	0.00171702	0.0176325	3.09932	0.806401	down		Transducin/WD40 repeat-like superfamily protein
FvH4_6g17410	-1.36313	0.00172819	0.0177124	3.12006	0.995716	down		Sulfite exporter TauE/SafE family protein
FvH4_2g12201	-1.65612	0.00176878	0.0180576	16.5483	4.67176	down
FvH4_6g20140	-1.79334	0.00177545	0.0181169	8.7073	2.25985	down	ATNHL10,NHL10,YLS9	Late embryogenesis abundant (LEA) hydroxyproline-rich glycoprotein family
FvH4_6g45780	-2.18795	0.00179498	0.0182715	3.36263	0.614353	down	scpl18	serine carboxypeptidase-like 18
FvH4_5g34250	-1.26394	0.00179924	0.0182991	7.37956	2.65751	down		Disease resistance protein (TIR-NBS-LRR class) family
FvH4_6g36241	-1.11096	0.00181281	0.0184083	40.1438	16.7688	down	AHA10	autoinhibited H(+)-ATPase isoform 10
FvH4_3g43890	-1.10216	0.00182871	0.0185427	15.5156	6.68381	down		NB-ARC domain-containing disease resistance protein
FvH4_3g07045	-1.31289	0.00183138	0.0185607	12.772	4.74594	down	RKF1	receptor-like kinase in flowers 1
FvH4_5g02600	-1.17879	0.00184467	0.0186773	9.50122	3.90693	down		Protein of unknown function (DUF3741)
FvH4_7g03660	-1.12895	0.00188016	0.0189357	60.0574	24.5333	down
FvH4_4g15300	-1.08836	0.00188459	0.0189693	5.48633	2.26941	down		Major facilitator superfamily protein
FvH4_6g34410	-1.12656	0.00190387	0.01911	5.42685	2.23238	down		disease resistance protein (TIR-NBS-LRR class), putative
FvH4_7g24150	-1.39323	0.0019058	0.0191202	28.4226	8.23232	down	ATHSPRO2,HSPRO2	ortholog of sugar beet HS1 PRO-1 2
FvH4_6g13451	-1.54705	0.00194194	0.0193897	27.8747	9.01019	down
FvH4_4g26770	-1.70621	0.00198988	0.0197833	4.06512	1.16935	down		Class I glutamine amidotransferase-like superfamily protein
FvH4_1g10851	-1.2254	0.00202757	0.0200911	2.93242	1.10877	down		TTF-type zinc finger protein with HAT dimerisation domain
FvH4_7g30620	-1.30638	0.00203558	0.0201609	25.4364	9.48907	down		P-loop containing nucleoside triphosphate hydrolases superfamily protein
FvH4_3g36250	-1.07327	0.00204996	0.020265	11.2297	4.78771	down		XH/XS domain-containing protein
FvH4_2g26470	-1.0073	0.0020835	0.0205188	46.5645	20.7129	down	ATTT12,TT12	MATE efflux family protein
FvH4_2g04310	-2.39742	0.00209285	0.0205594	5.19017	0.799335	down
FvH4_5g37240	-1.31934	0.00210745	0.020667	8.11115	2.98557	down		Ankyrin repeat family protein
FvH4_6g38480	-1.55562	0.00213939	0.0209508	2.19064	0.685822	down	ATGSL07,atgsl7,gsl07	glucan synthase-like 7
FvH4_2g07710	-1.6191	0.00214518	0.0209878	5.47387	1.65145	down		Uncharacterised protein family (UPF0497)
FvH4_3g45643	-1.03273	0.00216007	0.021094	15.6701	7.02151	down		NB-ARC domain-containing disease resistance protein
FvH4_6g15090	-1.46142	0.00215962	0.021094	3.42336	1.17463	down		NB-ARC domain-containing disease resistance protein
FvH4_1g26280	-1.08456	0.00216233	0.0211062	2.37328	0.926106	down	ABCB4,ATPGP4,MDR4,PGP4	ATP binding cassette subfamily B4
FvH4_3g33042	-1.27524	0.00216828	0.0211216	4.98859	1.71814	down		F-box/RNI-like superfamily protein
FvH4_1g15070	-1.40385	0.00218315	0.0212103	7.79556	2.52069	down
FvH4_6g39683	-1.68564	0.00218297	0.0212103	31.5443	7.66741	down
FvH4_1g10310	-1.32549	0.00220067	0.0213211	5.23453	1.92773	down		Transducin/WD40 repeat-like superfamily protein
FvH4_6g12260	-1.13865	0.00222152	0.0215031	36.7414	15.252	down		O-fucosyltransferase family protein
FvH4_1g00420	-2.47681	0.00224148	0.0216562	2.42929	0.415775	down		UDP-Glycosyltransferase superfamily protein
FvH4_4g32010	-1.07152	0.00225937	0.0217783	88.1175	38.7593	down	ATCUL1,AXR6,CUL1	cullin 1
FvH4_1g08970	-1.64688	0.00228623	0.0219264	2.45887	0.714986	down		Protein of unknown function (DUF300)
FvH4_1g04841	-1.05108	0.00230817	0.0220861	45.125	17.8699	down
FvH4_7g11310	-1.20332	0.0023151	0.0221322	9.81937	3.63212	down	PDLP8	plasmodesmata-located protein 8
FvH4_2g27721	-1.39115	0.00234447	0.0223618	4.37175	1.54289	down		Disease resistance protein (TIR-NBS-LRR class) family
FvH4_1g17860	-1.124	0.00235988	0.022478	9.7929	3.99875	down		Protein of unknown function (DUF295)
FvH4_6g20520	-2.20147	0.00235912	0.022478	3.09267	0.595432	down
FvH4_3g43950	-1.10435	0.0023725	0.022565	61.0045	26.3477	down		NB-ARC domain-containing disease resistance protein
FvH4_7g06401	-1.43208	0.00237185	0.022565	5.78297	1.81312	down		RNA-binding (RRM/RBD/RNP motifs) family protein
FvH4_7g08890	-1.32045	0.00237353	0.022565	4.85375	1.89777	down		NB-ARC domain-containing disease resistance protein
FvH4_1g11810	-1.15921	0.00237619	0.022567	53.9421	20.2007	down	F3'H,F3H,TT6	flavanone 3-hydroxylase
FvH4_3g22180	-1.01572	0.00240717	0.0228037	26.7821	12.0528	down		basic helix-loop-helix (bHLH) DNA-binding superfamily protein
FvH4_7g28970	-1.09055	0.00242713	0.022948	15.5147	6.48776	down		TraB family protein
FvH4_4g31660	-1.27505	0.00245569	0.0231271	11.8321	4.66631	down	AtMYB124,FLP,MYB124	Duplicated homeodomain-like superfamily protein
FvH4_7g32110	-2.15586	0.00246479	0.0231919	2.63017	0.538663	down		Cysteine proteinases superfamily protein
FvH4_7g06403	-1.41533	0.00247488	0.0232527	6.64964	2.33207	down		RNA-binding (RRM/RBD/RNP motifs) family protein
FvH4_5g27750	-1.75837	0.00249468	0.0233574	5.51638	1.31011	down	STRS1	DEA(D/H)-box RNA helicase family protein
FvH4_3g03481	-1.00712	0.00251139	0.0234928	6.42524	2.88341	down		S-locus lectin protein kinase family protein
FvH4_4g07060	-1.11968	0.00252898	0.0236256	7.41214	3.15341	down	MANIA,MNS2	alpha-mannosidase 2
FvH4_2g37040	-1.1652	0.00258126	0.0240281	10.6555	4.28092	down		hydroxyproline-rich glycoprotein family protein
FvH4_2g22530	-2.0065	0.00264039	0.0244696	6.69379	1.56886	down	ATAUX2-11,IAA4	AUX/IAA transcriptional regulator family protein
FvH4_6g07160	-1.19902	0.00265876	0.0245635	5.28031	2.03619	down
FvH4_6g07150	-1.68582	0.00271409	0.0249369	10.4528	3.0923	down		Calmodulin-binding protein
FvH4_3g07380	-1.00794	0.00271916	0.024967	53.4789	23.4796	down
FvH4_7g18250	-1.62821	0.0027347	0.0250547	7.4268	2.20732	down	anac096,NAC096	NAC domain containing protein 96
FvH4_7g33080	-1.18798	0.00278817	0.0254776	10.0428	3.96041	down		Calcium-binding endonuclease/exonuclease/phosphatase family
FvH4_1g17200	-1.36969	0.00282715	0.0257823	12.5119	5.46606	down		Protein of unknown function (DUF1230)
FvH4_2g02432	-1.31224	0.00282524	0.0257823	58.1911	21.687	down	ADL6,DRP2A	dynamin-like protein 6
FvH4_3g45401	-1.33494	0.00283027	0.0257946	11.5175	4.41224	down	ACD1-LIKE,PTC52,TIC55-IV	ACD1-like
FvH4_1g22971	-1.03535	0.00284328	0.025883	7.81541	3.44523	down		tRNAHis guanylyltransferase
FvH4_5g27650	-1.36278	0.00290089	0.0263005	4.62871	1.61201	down	AtHB31,HB31	homeobox protein 31
FvH4_6g38350	-1.41311	0.00291272	0.0263735	6.25691	2.09436	down	ATKCO6,ATTPK3,KCO6,TPK3	Ca2+ activated outward rectifying K+ channel 6
FvH4_6g45521	-1.50365	0.00292837	0.0264922	6.89804	2.14342	down		NAD(P)-binding Rossmann-fold superfamily protein
FvH4_1g27610	-1.4469	0.00296118	0.0267428	19.0922	6.48229	down	AGO6	Argonaute family protein
FvH4_6g28100	-1.24314	0.00303848	0.0272875	8.91964	3.4649	down		S-adenosyl-L-methionine-dependent methyltransferases superfamily protein
FvH4_6g03040	-1.22753	0.00318535	0.0283025	18.8926	7.34401	down
FvH4_6g32520	-1.05253	0.00324788	0.0286995	38.1369	16.3188	down	AGL1,SHP1	K-box region and MADS-box transcription factor family protein
FvH4_2g23620	-1.00318	0.00327473	0.0288513	38.9692	17.2838	down		Protein of unknown function (DUF3049)
FvH4_2g37160	-1.10397	0.00333123	0.0292627	9.96688	4.26051	down	ATGLR2.8,GLR2.8	glutamate receptor 2.8
FvH4_6g37580	-3.46185	0.00336701	0.0295026	4.1557	0.346087	down
FvH4_5g22820	-1.17842	0.00348346	0.0303322	46.8318	19.1786	down
FvH4_5g25662	-1.32361	0.00350495	0.0304597	6.61818	2.46631	down		Tetratricopeptide repeat (TPR)-like superfamily protein
FvH4_2g09110	-1.47555	0.00351906	0.0305278	4.2827	1.27696	down		NmrA-like negative transcriptional regulator family protein
FvH4_3g17651	-2.13212	0.00359306	0.0310408	11.899	3.32983	down
FvH4_7g23671	-1.69454	0.00360781	0.0311168	4.63818	1.39935	down		UDP-Glycosyltransferase superfamily protein
FvH4_3g03110	-1.22691	0.00363309	0.0312703	27.382	11.3629	down
FvH4_5g30300	-1.08682	0.00368645	0.0316384	18.0598	7.70282	down	ATCTC1,CTC1	conserved telomere maintenance component 1
FvH4_1g19880	-1.74537	0.00372639	0.0319026	3.25173	0.926135	down
FvH4_4g13681	-1.66374	0.00383417	0.0326914	6.90963	1.94926	down		EXS (ERD1/XPR1/SYG1) family protein
FvH4_6g50090	-1.45335	0.00385814	0.0328624	2.55522	0.700855	down		RING/U-box superfamily protein with ARM repeat domain
FvH4_1g29190	-1.23368	0.00387346	0.0329457	47.8396	19.4694	down		cytochrome c biogenesis protein family
FvH4_5g09901	-1.04685	0.00387835	0.0329739	29.6024	11.2231	down
FvH4_4g03740	-1.84534	0.00390666	0.0331337	2.77334	0.681276	down	ARLIM15,ATDMC1,DMC1	DNA repair (Rad51) family protein
FvH4_6g27022	-1.57306	0.00393808	0.0333595	2.45009	0.756779	down		DNA/RNA polymerases superfamily protein
FvH4_7g28350	-1.08693	0.00395316	0.0334331	2.11363	0.816211	down	CYP704A1	cytochrome P450, family 704, subfamily A, polypeptide 1
FvH4_3g40413	-1.06489	0.00395772	0.0334446	12.522	5.57084	down		Insulinase (Peptidase family M16) family protein
FvH4_6g10810	-5.69698	0.00396301	0.0334758	1.93666	0	down	OSH1	gamma interferon responsive lysosomal thiol (GILT) reductase family protein
FvH4_2g26160	-1.02624	0.00398349	0.0336352	17.887	8.05045	down		P-loop nucleoside triphosphate hydrolases superfamily protein with CH (Calponin Homology) domain
FvH4_3g05900	-1.77874	0.00399806	0.0337309	8.98494	2.28786	down
FvH4_3g16960	-1.13624	0.00400359	0.0337503	11.1106	4.65807	down	ATGSL04,atgsl4,gsl04	glucan synthase-like 4
FvH4_7g05460	-1.12693	0.0040399	0.0339332	13.6029	5.74484	down		5'-nucleotidases;magnesium ion binding
FvH4_2g00300	-1.07232	0.0040972	0.0342905	23.0853	10.0367	down		RING/U-box superfamily protein
FvH4_7g23440	-1.13195	0.00411448	0.0344075	8.63198	3.51789	down		transcriptional factor B3 family protein
FvH4_5g38230	-1.08154	0.00420445	0.0350058	20.0313	8.68185	down
FvH4_6g05061	-2.76844	0.00422686	0.0351224	3.82456	0.622899	down		Major facilitator superfamily protein
FvH4_7g05740	-1.42045	0.00435342	0.0358887	5.80395	1.81807	down		Major facilitator superfamily protein
FvH4_4g27850	-1.73741	0.00436908	0.0359893	2.74921	0.673355	down
FvH4_7g18790	-1.26488	0.0044349	0.0363739	17.1981	6.67918	down	ARK1,CAE1,MRH2	Armadillo/beta-catenin repeat family protein / kinesin motor family protein
FvH4_4g08972	-1.45872	0.00444162	0.0364146	17.1381	5.48586	down
FvH4_2g34420	-2.42289	0.00445487	0.0364674	2.03021	0.298346	down	CYP707A4	cytochrome P450, family 707, subfamily A, polypeptide 4
FvH4_6g06440	-1.20576	0.00447428	0.0366106	6.83306	2.75752	down	RECQSIM	RECQ helicase SIM
FvH4_4g08122	-1.30094	0.004521	0.0369166	29.8847	11.1233	down
FvH4_7g31470	-1.4486	0.00454887	0.0370758	3.4065	1.0812	down		2-oxoglutarate (2OG) and Fe(II)-dependent oxygenase superfamily protein
FvH4_7g22750	-1.90493	0.00455586	0.0370894	3.13033	1.01323	down		Protein of unknown function (DUF674)
FvH4_1g17470	-1.38168	0.00457674	0.0372282	3.0797	1.05646	down		Disease resistance protein (CC-NBS-LRR class) family
FvH4_3g25020	-1.18678	0.00458181	0.0372282	83.1684	34.3365	down	AGL1,SHP1	K-box region and MADS-box transcription factor family protein
FvH4_4g35190	-3.86483	0.00458182	0.0372282	3.13414	0.176365	down
FvH4_4g33281	-1.62754	0.00460383	0.037378	4.3154	1.29046	down		Protein kinase family protein with leucine-rich repeat domain
FvH4_2g27900	-1.15974	0.0046297	0.0375357	5.17819	1.98791	down		Glutathione S-transferase family protein
FvH4_3g40411	-1.46796	0.00463079	0.0375357	10.2543	3.22229	down		Insulinase (Peptidase family M16) family protein
FvH4_1g19100	-1.68797	0.00466237	0.0377506	6.32227	1.74736	down
FvH4_3g44391	-1.17831	0.00468314	0.03786	4.63687	1.89353	down		disease resistance protein (TIR-NBS-LRR class), putative
FvH4_3g02500	-1.01023	0.00474751	0.0382178	19.1835	8.50622	down	ATGPT1,GPT1	glucose 6-phosphate/phosphate translocator 1
FvH4_3g45630	-1.23845	0.0048013	0.0384878	9.8604	4.07723	down		disease resistance protein (TIR-NBS-LRR class), putative
FvH4_3g03435	-1.44845	0.00489424	0.0390381	16.0875	5.50264	down	SD1-29	S-domain-1 29
FvH4_7g28161	-3.22854	0.00491394	0.039154	2.30705	0.245456	down
FvH4_7g10440	-1.11717	0.00494763	0.0393174	15.0284	5.48538	down		WRKY family transcription factor
FvH4_5g30740	-1.26556	0.00499011	0.0395912	5.78251	2.21042	down
FvH4_3g36584	-1.14377	0.00508225	0.040185	28.2213	12.4954	down	PYM,UVI4	uv-b-insensitive 4
FvH4_4g09521	-1.13114	0.00514506	0.0405539	77.5252	33.4135	down
FvH4_6g52090	-1.31636	0.00517533	0.0407274	3.42946	1.26702	down		F-box and associated interaction domains-containing protein
FvH4_5g29010	-1.01971	0.00517908	0.0407348	11.8811	6.00582	down		Plant calmodulin-binding protein-related
FvH4_5g11900	-1.4979	0.00519601	0.0408526	3.60183	1.16404	down		Plant protein of unknown function (DUF247)
FvH4_6g10791	-1.09225	0.00523103	0.0410507	154.879	57.5492	down
FvH4_4g13682	-2.08331	0.00526308	0.0412248	4.00219	0.989154	down		EXS (ERD1/XPR1/SYG1) family protein
FvH4_4g08121	-1.09746	0.00531137	0.0414787	21.5832	9.24779	down
FvH4_5g03630	-1.25609	0.00532092	0.0415222	18.5781	7.30479	down		disease resistance protein (TIR-NBS-LRR class), putative
FvH4_6g28290	-1.01226	0.00535925	0.0417746	2.82164	1.24945	down		zinc ion binding
FvH4_2g03330	-1.01734	0.00538802	0.0419675	30.3613	13.6311	down	ATPRP40A,PRP40A	pre-mRNA-processing protein 40A
FvH4_1g12820	-1.03741	0.00555364	0.0430196	19.2724	8.65863	down		Protein kinase superfamily protein
FvH4_4g17780	-1.44969	0.00555809	0.0430196	4.61773	1.49294	down
FvH4_2g05820	-1.00427	0.0055715	0.0430596	7.96289	3.30085	down	PUB26	plant U-box 26
FvH4_4g08191	-1.00163	0.00559384	0.0431844	19.0238	8.74478	down	CRK8	cysteine-rich RLK (RECEPTOR-like protein kinase) 8
FvH4_6g21081	-1.02336	0.00562449	0.0433892	22.9218	10.3202	down
FvH4_7g24310	-1.11281	0.00562453	0.0433892	18.8618	9.91346	down
FvH4_5g12280	-1.38788	0.00565438	0.0435239	7.08777	2.21782	down
FvH4_3g30700	-2.46085	0.00578585	0.0443578	2.67436	0.419722	down	APM4,ATPEX12,PEX12	peroxin-12
FvH4_4g16761	-1.79737	0.00578617	0.0443578	2.24451	0.585044	down		Protein kinase superfamily protein
FvH4_1g18540	-1.01823	0.00579347	0.0443975	17.3365	7.81081	down		zinc ion binding
FvH4_4g14680	-1.15841	0.00582428	0.0445682	13.8556	6.37887	down
FvH4_7g31370	-1.18456	0.00587087	0.0448098	9.46678	3.71729	down		Ribonuclease P protein subunit P38-related
FvH4_7g27354	-1.11747	0.00596584	0.0454512	47.5043	20.9183	down	ATNOA1,ATNOS1,NOA1,NOS1,RIF1	P-loop containing nucleoside triphosphate hydrolases superfamily protein
FvH4_5g10090	-1.04949	0.00605625	0.0460064	5.53175	2.33952	down		Protein kinase superfamily protein
FvH4_4g01760	-1.49554	0.00608799	0.0461546	5.71735	1.82094	down	CML11	calmodulin-like 11
FvH4_2g25220	-2.78737	0.00612886	0.0463458	2.59097	0.525108	down	ATGSTF5,ATGSTF8,GST6,GSTF8	glutathione S-transferase phi 8
FvH4_4g03070	-1.25425	0.00615956	0.046487	25.739	11.0569	down
FvH4_1g09110	-1.03324	0.00626285	0.0471304	16.3477	7.32443	down		disease resistance protein (TIR-NBS-LRR class), putative
FvH4_7g06404	-1.60889	0.00626241	0.0471304	5.33914	1.82984	down
FvH4_6g07180	-1.02682	0.00629069	0.0473058	46.4444	21.7295	down	ULP1A	UB-like protease 1A
FvH4_5g39760	-1.04527	0.00633256	0.0474669	25.2234	10.0971	down
FvH4_2g13660	-1.80245	0.00635253	0.0475654	3.19957	0.865631	down		HSP20-like chaperones superfamily protein
FvH4_4g25360	-1.01343	0.0064636	0.0481727	18.2352	8.28461	down	emb1745	embryo defective 1745
FvH4_3g20963	-1.15242	0.00648354	0.0482536	4.64039	1.98795	down	HSI2,VAL1	high-level expression of sugar-inducible gene 2
FvH4_6g06441	-1.18525	0.00648014	0.0482536	53.7004	22.0474	down	RECQSIM	RECQ helicase SIM
FvH4_7g29340	-1.65319	0.00648835	0.0482642	3.07205	0.856507	down		RNI-like superfamily protein
FvH4_1g10661	-2.33523	0.00667521	0.0492793	4.53729	0.874606	down	ATHCHIB,B-CHI,CHI-B,HCHIB,PR-3,PR3	basic chitinase
FvH4_3g35820	-1.2752	0.0067199	0.0494655	2.71193	1.05076	down	NAP1;2,NFA02,NFA2	nucleosome assembly protein 1;2
FvH4_1g15670	-1.33497	0.00679833	0.0498322	5.48267	1.98446	down		SAP domain-containing protein
FvH4_5g16480	-1.19595	0.00680807	0.0498412	8.64297	3.59456	down	UGT74B1	UDP-glucosyl transferase 74B1
FvH4_6g38790	-1.08731	0.00681929	0.0498983	5.04073	2.12902	down		Protein of unknown function (DUF3414)

## Sheet: DE genes-2
Genes up-regulated or down-regulated in the REM compared to FM
Genes with log2FoldChange >1.0 and a padj < 0.05 are shown.
Gene ID	log2FoldChange	p-value	padj	FM_TPM	REM_TPM	Regulation	Symbol	Description
FvH4_4g29650	-10.1688	7.02e-185	1.45e-180	0.295207	426.474	up	ATUTR2,UTR2	UDP-galactose transporter 2
FvH4_3g06720	-4.8003	1.16e-129	1.2e-125	6.14684	218.7	up	AG	K-box region and MADS-box transcription factor family protein
FvH4_6g37880	-7.29557	2.94e-75	2.02e-71	0.595922	109.885	up	AGL1,SHP1	K-box region and MADS-box transcription factor family protein
FvH4_1g26980	-3.4382	1.91e-53	7.88e-50	3.1015	40.9639	up	ATWRKY23,WRKY23	WRKY DNA-binding protein 23
FvH4_3g40180	-4.0247	5.39e-50	1.85e-46	1.22428	24.6256	up		Peroxidase superfamily protein
FvH4_6g06180	-2.90315	6.38e-48	1.64e-44	11.7908	107.341	up	ATSNF4,SNF4	homolog of yeast sucrose nonfermenting 4
FvH4_3g04550	-3.14966	3.62e-45	8.3e-42	4.68744	53.035	up		lysine decarboxylase family protein
FvH4_6g07170	-2.60845	2.71e-43	5.59e-40	32.7824	247.274	up		Polynucleotidyl transferase, ribonuclease H-like superfamily protein
FvH4_2g26190	-3.48116	1.54e-41	2.89e-38	2.41128	35.4889	up	MCT1	MEI2 C-terminal RRM only like 1
FvH4_4g20720	-2.50597	7.93e-36	1.17e-32	7.77664	56.7266	up
FvH4_1g13440	-4.3639	2.55e-34	3.29e-31	1.67545	42.6946	up		Sulfite exporter TauE/SafE family protein
FvH4_1g08740	-6.40467	1.6e-33	1.79e-30	0.162369	16.4679	up
FvH4_2g27400	-2.21342	3.31e-32	3.25e-29	6.65726	38.6249	up		Transcriptional factor B3 family protein
FvH4_5g16630	-4.05948	6.12e-32	5.73e-29	24.4491	548.524	up
FvH4_2g33440	-2.6061	1.05e-31	9.05e-29	2.04824	16.39	up	APUM12,PUM12	pumilio 12
FvH4_1g12713	-3.85957	2.42e-30	1.99e-27	0.928172	16.1167	up		P-loop containing nucleoside triphosphate hydrolases superfamily protein
FvH4_3g04400	-2.30448	5.14e-30	4.08e-27	9.14845	56.7421	up	PGA6,WUS,WUS1	Homeodomain-like superfamily protein
FvH4_6g45640	-4.45467	1.45e-29	1.11e-26	0.413225	11.669	up	TBL19	TRICHOME BIREFRINGENCE-LIKE 19
FvH4_7g01720	-3.87183	1.91e-29	1.4e-26	3.31804	63.6196	up	AGL15	AGAMOUS-like 15
FvH4_3g04290	-3.00379	4.31e-29	2.96e-26	12.5389	113.758	up		basic helix-loop-helix (bHLH) DNA-binding family protein
FvH4_6g10590	-2.12831	7.29e-29	4.69e-26	5.25995	28.5016	up
FvH4_4g23530	-1.88859	1.07e-28	6.69e-26	47.3153	220.729	up	AGL9,SEP3	K-box region and MADS-box transcription factor family protein
FvH4_6g01940	-2.41683	3.93e-28	2.38e-25	17.9831	119.995	up	LSH1	Protein of unknown function (DUF640)
FvH4_4g35800	-2.68911	1.52e-27	8.97e-25	4.49802	36.8844	up	NRT1.7	nitrate transporter 1.7
FvH4_1g14630	-3.95673	2.59e-27	1.48e-24	0.833898	15.0741	up	RTV1	related to vernalization1 1
FvH4_5g36980	-3.20702	4.77e-26	2.4e-23	1.18533	9.59423	up	AtUGT85A2,UGT85A2	UDP-glucosyl transferase 85A2
FvH4_3g03530	-2.77269	9.36e-26	4.59e-23	17.4307	143.496	up	LFY,LFY3	floral meristem identity control protein LEAFY (LFY)
FvH4_2g39660	-2.11876	2.14e-25	1.02e-22	24.5403	129.442	up	ATRL6,RL6,RSM3	RAD-like 6
FvH4_1g06090	-2.48943	7.1e-24	3.11e-21	3.42181	19.1073	up		Senescence/dehydration-associated protein-related
FvH4_4g34280	-7.26207	1.65e-23	7.08e-21	0.138954	22.2696	up
FvH4_1g28120	-3.25961	3.29e-23	1.38e-20	1.07205	12.7752	up	GDH1	glutamate dehydrogenase 1
FvH4_1g12741	-2.75976	4.23e-23	1.74e-20	3.00428	22.9254	up		P-loop containing nucleoside triphosphate hydrolases superfamily protein
FvH4_3g17360	-4.69055	7.64e-23	3.09e-20	0.284294	8.21006	up		Protein kinase superfamily protein
FvH4_1g12720	-2.42671	7.97e-23	3.16e-20	5.47061	34.2132	up		P-loop containing nucleoside triphosphate hydrolases superfamily protein
FvH4_2g32000	-2.20557	3.07e-22	1.19e-19	3.77138	21.3269	up	ATCBL10,CBL10,SCABP8	calcineurin B-like protein 10
FvH4_3g22710	-1.9018	1.57e-21	5.99e-19	13.3929	61.7018	up		RING/U-box superfamily protein
FvH4_5g03300	-4.59134	2.97e-21	1.07e-18	0.346313	10.4697	up		Protein of unknown function (DUF567)
FvH4_4g13520	-2.32293	3.66e-21	1.3e-18	0.654948	4.09816	up	ATSPS3F,SPS3F	sucrose phosphate synthase 3F
FvH4_3g38530	-5.07128	7.38e-21	2.58e-18	0.316878	14.6366	up	ATCAX1,CAX1,RCI4	cation exchanger 1
FvH4_2g33010	-5.13323	1.11e-20	3.73e-18	0.186354	6.63738	up	ATNAP1;1,NAP1;1	nucleosome assembly protein1;1
FvH4_6g11493	-3.75351	2.15e-20	7.02e-18	1.53876	25.3666	up	ATCAX1,CAX1,RCI4	cation exchanger 1
FvH4_4g02460	-2.67078	7.25e-20	2.26e-17	15.6368	119.886	up
FvH4_3g03540	-2.64527	9.12e-20	2.8e-17	4.98626	38.1556	up	ANAC098,ATCUC2,CUC2	NAC (No Apical Meristem) domain transcriptional regulator superfamily protein
FvH4_6g28840	-2.67148	1.2e-19	3.65e-17	1.62149	13.3327	up		C2H2 and C2HC zinc fingers superfamily protein
FvH4_5g18010	-2.34978	6.31e-19	1.83e-16	7.86927	50.9009	up	GAD4	glutamate decarboxylase 4
FvH4_4g19610	-2.48623	8.83e-19	2.46e-16	6.92587	48.3677	up		Acyl-CoA N-acyltransferases (NAT) superfamily protein
FvH4_3g39570	-3.324	1.57e-18	4.26e-16	0.877929	10.5603	up		UDP-Glycosyltransferase superfamily protein
FvH4_3g13120	-2.27226	3.85e-18	1.02e-15	7.3422	43.4079	up	UBQ11	ubiquitin 11
FvH4_6g08442	-2.11904	5.05e-18	1.32e-15	1.88537	10.1977	up		Pyridoxal phosphate (PLP)-dependent transferases superfamily protein
FvH4_3g07770	-3.34446	5.47e-18	1.41e-15	4.54444	63.94	up	LSH10	Protein of unknown function (DUF640)
FvH4_3g21060	-2.62776	7.38e-18	1.86e-15	3.85418	29.0856	up	ATCNGC4,CNGC4,DND2,HLM1	cyclic nucleotide-gated cation channel 4
FvH4_7g28350	-2.22872	7.41e-18	1.86e-15	0.816211	4.83112	up	CYP704A1	cytochrome P450, family 704, subfamily A, polypeptide 1
FvH4_2g31220	-1.87227	9.89e-18	2.45e-15	5.06907	23.5206	up	ATMSL10,MSL10	mechanosensitive channel of small conductance-like 10
FvH4_6g37770	-1.94224	1.69e-17	4.14e-15	21.5374	104.129	up	AtRLP29,RLP29	receptor like protein 29
FvH4_2g25980	-2.46422	1.83e-17	4.43e-15	2.49072	16.4162	up		Plant invertase/pectin methylesterase inhibitor superfamily
FvH4_4g09940	-3.02427	1.88e-17	4.5e-15	1.73296	17.9316	up		CAP (Cysteine-rich secretory proteins, Antigen 5, and Pathogenesis-related 1 protein) superfamily protein
FvH4_6g36270	-6.15444	2.06e-17	4.89e-15	0.0537884	5.3565	up		Glycosyl hydrolase superfamily protein
FvH4_1g12090	-3.68988	2.19e-17	5.14e-15	6.62521	96.7542	up		Lactoylglutathione lyase / glyoxalase I family protein
FvH4_3g35730	-2.3764	3.77e-17	8.63e-15	2.32868	14.5961	up	WOX2	WUSCHEL related homeobox 2
FvH4_6g08500	-3.44414	4.59e-17	1.03e-14	4.27887	54.9075	up	APA1,ATAPA1	aspartic proteinase A1
FvH4_3g34770	-4.71062	1.29e-16	2.71e-14	0.269469	6.86252	up	REM39,VRN1	AP2/B3-like transcriptional factor family protein
FvH4_6g27400	-1.94988	1.26e-16	2.71e-14	4.16199	19.7275	up	LSH10	Protein of unknown function (DUF640)
FvH4_7g05090	-1.561	1.44e-16	3e-14	14.1655	52.8373	up		Leucine-rich repeat protein kinase family protein
FvH4_3g45290	-4.62443	4.56e-16	9.04e-14	0.465598	11.0756	up		Amino acid permease family protein
FvH4_1g12700	-3.16769	1e-15	1.84e-13	0.871774	8.97456	up		P-loop containing nucleoside triphosphate hydrolases superfamily protein
FvH4_3g11611	-3.12111	1.43e-15	2.58e-13	0.532978	4.08985	up		Glycosyl hydrolases family 31 protein
FvH4_3g28780	-1.59987	1.45e-15	2.6e-13	12.837	47.4004	up	NF-YA9	nuclear factor Y, subunit A9
FvH4_4g02510	-2.39378	1.47e-15	2.6e-13	6.11961	42.9606	up	NRPE7	RNA polymerase Rpb7-like, N-terminal domain
FvH4_3g13670	-2.47311	1.56e-15	2.75e-13	0.639244	4.33697	up	GPDL2,MRH5,SHV3	PLC-like phosphodiesterase family protein
FvH4_1g14620	-3.21778	1.96e-15	3.42e-13	2.59551	27.4762	up		AP2/B3-like transcriptional factor family protein
FvH4_4g01670	-3.25275	3.28e-15	5.64e-13	0.336219	3.92497	up		ATPase E1-E2 type family protein / haloacid dehalogenase-like hydrolase family protein
FvH4_5g34990	-1.93274	3.28e-15	5.64e-13	1.42678	6.72494	up		P-loop containing nucleoside triphosphate hydrolases superfamily protein
FvH4_1g26760	-2.7152	1.43e-14	2.4e-12	1.15033	8.92362	up	ATGA2OX4,ATGA2OX6,DTA1,GA2OX6	gibberellin 2-oxidase 6
FvH4_4g04470	-2.52026	1.9e-14	3.16e-12	4.40856	30.6641	up	SDG31,SUVR4	SET-domain containing protein lysine methyltransferase family protein
FvH4_3g04940	-4.2626	2.41e-14	3.92e-12	0.274874	7.34725	up		Tetraspanin family protein
FvH4_4g35051	-4.39302	2.47e-14	3.98e-12	1.75437	41.556	up	UGT74B1	UDP-glucosyl transferase 74B1
FvH4_6g12720	-3.27603	2.78e-14	4.38e-12	4.67586	58.9679	up
FvH4_6g10240	-2.83247	4.89e-14	7.36e-12	1.87081	16.8982	up
FvH4_7g28550	-3.98617	5.16e-14	7.65e-12	0.214245	4.02896	up		Disease resistance protein (TIR-NBS-LRR class) family
FvH4_2g03601	-3.22939	5.37e-14	7.9e-12	0.634469	6.57767	up		PHD finger transcription factor, putative
FvH4_3g13300	-1.28916	5.63e-14	8.23e-12	14.0885	42.4649	up		DNA glycosylase superfamily protein
FvH4_7g04060	-4.45682	6.39e-14	9.27e-12	0.164062	4.43335	up	REM39,VRN1	AP2/B3-like transcriptional factor family protein
FvH4_4g17940	-1.8044	6.66e-14	9.59e-12	4.49244	19.2084	up		Heavy metal transport/detoxification superfamily protein
FvH4_4g22060	-2.4705	7.39e-14	1.06e-11	2.79037	18.9002	up		Protein of unknown function (DUF1624)
FvH4_6g26610	-1.41819	1.17e-13	1.65e-11	6.13242	20.8114	up		Tyrosine transaminase family protein
FvH4_2g01710	-2.92824	1.23e-13	1.72e-11	1.01181	9.00329	up		Amidase family protein
FvH4_5g17450	-1.30871	1.26e-13	1.76e-11	19.315	60.0638	up		ketose-bisphosphate aldolase class-II family protein
FvH4_6g10740	-2.69489	1.64e-13	2.23e-11	8.93672	73.9985	up	PYL4,RCAR10	PYR1-like 4
FvH4_6g01760	-1.775	2.87e-13	3.76e-11	11.5134	47.2442	up
FvH4_1g14170	-2.60988	3.64e-13	4.71e-11	4.12327	30.9021	up	CML41	calmodulin-like 41
FvH4_5g20491	-2.47126	7.62e-13	9.57e-11	0.707141	4.86642	up		Frigida-like protein
FvH4_3g02900	-2.91342	1.04e-12	1.29e-10	0.784595	7.71894	up		Sulfite exporter TauE/SafE family protein
FvH4_5g27650	-2.13181	2.84e-12	3.4e-10	1.61201	8.39626	up	AtHB31,HB31	homeobox protein 31
FvH4_6g46340	-1.531	3.22e-12	3.79e-10	96.968	347.949	up		Pollen Ole e 1 allergen and extensin family protein
FvH4_3g03610	-2.53982	4.72e-12	5.46e-10	10.3922	77.4037	up		Calcium-binding EF-hand family protein
FvH4_3g30320	-1.6597	5.24e-12	6.02e-10	9.72746	38.7806	up		Bifunctional inhibitor/lipid-transfer protein/seed storage 2S albumin superfamily protein
FvH4_6g48800	-1.94494	6.49e-12	7.27e-10	4.48584	20.9967	up		Ankyrin repeat family protein
FvH4_7g01760	-2.46654	7.59e-12	8.32e-10	0.556318	3.9051	up	scpl40	serine carboxypeptidase-like 40
FvH4_7g22590	-2.45551	7.7e-12	8.4e-10	1.13096	7.81058	up	APK1B,PK1B	protein kinase 1B
FvH4_2g39510	-1.81202	1.31e-11	1.42e-09	7.03663	30.6144	up		Glycosyl hydrolase superfamily protein
FvH4_4g22950	-2.23225	1.41e-11	1.5e-09	1.07662	6.10026	up		RING finger protein
FvH4_7g15040	-1.39705	2.52e-11	2.57e-09	107.856	355.219	up		Pectin lyase-like superfamily protein
FvH4_3g01740	-2.06501	2.61e-11	2.65e-09	215.314	1068.09	up	SLP3	subtilisin-like serine protease 3
FvH4_3g28050	-2.89668	2.85e-11	2.86e-09	6.51949	56.2967	up	ADS3,FAD5,FADB,JB67	fatty acid desaturase 5
FvH4_7g25560	-2.70789	3.97e-11	3.91e-09	0.952753	7.73298	up		Major facilitator superfamily protein
FvH4_7g30860	-1.72401	5.44e-11	5.29e-09	4.00012	16.1087	up	ATMRP14,MRP14	multidrug resistance-associated protein 14
FvH4_3g38930	-1.39912	7.64e-11	7.35e-09	1.63346	5.40678	up		PHD finger transcription factor, putative
FvH4_4g27680	-3.35307	1.2e-10	1.14e-08	0.251423	3.22895	up	ALMT9,AtALMT9	aluminum-activated malate transporter 9
FvH4_3g21240	-4.16372	1.62e-10	1.51e-08	0.770812	17.7076	up	PBP1	pinoid-binding protein 1
FvH4_5g06090	-1.03176	1.95e-10	1.8e-08	15.2928	38.7838	up		Copper amine oxidase family protein
FvH4_5g20730	-2.48066	2.19e-10	2e-08	5.14932	34.0864	up	chr31	chromatin remodeling 31
FvH4_2g34420	-3.70617	2.45e-10	2.22e-08	0.298346	5.11254	up	CYP707A4	cytochrome P450, family 707, subfamily A, polypeptide 4
FvH4_5g14380	-1.52518	2.44e-10	2.22e-08	2.57168	9.00189	up		Plant protein of unknown function (DUF863)
FvH4_7g23440	-2.43766	3.54e-10	3.19e-08	3.51789	22.9817	up		transcriptional factor B3 family protein
FvH4_2g13450	-2.14908	4.41e-10	3.92e-08	0.564992	3.22174	up		Leucine-rich receptor-like protein kinase family protein
FvH4_3g36370	-2.03953	6.98e-10	6.07e-08	5.73595	27.8	up
FvH4_4g17600	-1.6535	7.87e-10	6.78e-08	9.37552	35.0353	up		Protein kinase superfamily protein
FvH4_2g40541	-3.61968	8.65e-10	7.4e-08	0.151752	2.44714	up		Transducin/WD40 repeat-like superfamily protein
FvH4_6g37550	-1.64292	9.22e-10	7.82e-08	2.05184	7.86538	up		Leucine-rich repeat transmembrane protein kinase
FvH4_4g25110	-2.16826	9.58e-10	8.09e-08	0.969413	5.29046	up		Pectate lyase family protein
FvH4_7g01120	-2.57741	1e-09	8.4e-08	2.15065	15.1112	up	ATHAP2A,EMB2220,HAP2A,NF-YA1	nuclear factor Y, subunit A1
FvH4_2g02540	-1.91301	1.06e-09	8.82e-08	4.04684	18.3297	up	LRR,XI-23,RLK7	Leucine-rich receptor-like protein kinase family protein
FvH4_7g12040	-1.85306	1.17e-09	9.62e-08	2.74765	12.3305	up	AHL22	AT-hook motif nuclear-localized protein 22
FvH4_7g17080	-2.25248	1.56e-09	1.25e-07	6.48682	40.4727	up		Calcium-binding EF-hand family protein
FvH4_6g46530	-1.50625	1.79e-09	1.43e-07	3.84198	14.0794	up	COB	COBRA-like extracellular glycosyl-phosphatidyl inositol-anchored protein family
FvH4_7g22285	-2.27729	2.01e-09	1.59e-07	0.971737	5.85867	up	AT-HSC70-1,HSC70,HSC70-1,HSP70-1	heat shock cognate protein 70-1
FvH4_6g14150	-5.30487	2.18e-09	1.72e-07	0.102326	2.56898	up	ATCHX20,CHX20	cation/H+ exchanger 20
FvH4_4g21020	-1.16171	2.24e-09	1.75e-07	17.9123	49.3971	up		HCO3- transporter family
FvH4_1g14670	-1.90007	2.7e-09	2.09e-07	14.4555	65.1186	up	REM39,VRN1	AP2/B3-like transcriptional factor family protein
FvH4_6g18480	-7.67747	2.78e-09	2.15e-07	0	5.5473	up	ATC	centroradialis
FvH4_4g31730	-1.40043	4.23e-09	3.15e-07	1.81357	6.00616	up		Leucine-rich repeat protein kinase family protein
FvH4_6g32440	-3.40351	4.43e-09	3.29e-07	0.976302	12.8125	up	AB140,CAB1,CAB140,LHCB1.3	chlorophyll A/B binding protein 1
FvH4_5g30710	-1.75877	5.52e-09	4.09e-07	15.7116	64.3549	up	ATBXL4,XYL4	beta-D-xylosidase 4
FvH4_4g11660	-2.23063	5.84e-09	4.31e-07	1.09745	6.08715	up	ATEXT3,EXT3,RSH	extensin 3
FvH4_6g13322	-1.46653	6.12e-09	4.49e-07	2.78605	9.57977	up		2-oxoglutarate (2OG) and Fe(II)-dependent oxygenase superfamily protein
FvH4_4g28910	-1.04392	6.55e-09	4.75e-07	33.1372	86.6562	up		basic helix-loop-helix (bHLH) DNA-binding superfamily protein
FvH4_6g30530	-2.53755	7.03e-09	5.08e-07	0.628157	4.30921	up	ATBOR4,BOR4	HCO3- transporter family
FvH4_6g04970	-1.065	1.11e-08	7.75e-07	204.41	547.761	up	AHP1	histidine-containing phosphotransmitter 1
FvH4_7g08940	-3.10639	1.11e-08	7.75e-07	0.394228	3.82812	up		Nodulin MtN3 family protein
FvH4_3g41420	-1.1747	1.13e-08	7.89e-07	1.95602	5.4678	up	BRL1	BRI1 like
FvH4_6g33170	-3.82536	1.2e-08	8.29e-07	0.163733	2.47484	up	CYP90D1	cytochrome P450, family 90, subfamily D, polypeptide 1
FvH4_3g13370	-2.30407	1.21e-08	8.36e-07	6.42082	37.7587	up	ATPCAP1,PCAP1	plasma-membrane associated cation-binding protein 1
FvH4_5g18850	-1.88789	1.24e-08	8.46e-07	5.14776	24.3874	up
FvH4_2g00900	-2.14981	1.49e-08	1.01e-06	0.84081	4.52541	up		P-loop containing nucleoside triphosphate hydrolases superfamily protein
FvH4_3g38680	-1.7314	1.56e-08	1.05e-06	2.11911	8.61696	up	ATPLC2,PLC2	phospholipase C 2
FvH4_4g02480	-1.48016	1.68e-08	1.12e-06	29.0702	98.6637	up
FvH4_2g17400	-2.20589	1.75e-08	1.16e-06	1.34169	6.85098	up		LRR and NB-ARC domains-containing disease resistance protein
FvH4_6g43290	-1.06275	1.77e-08	1.17e-06	7.98564	20.7302	up	ATGLR3.7,GLR3.7,GLR5	glutamate receptor 5
FvH4_1g08160	-2.14829	1.88e-08	1.24e-06	30.7919	161.849	up	ATHAP2C,HAP2C,NF-YA3	nuclear factor Y, subunit A3
FvH4_5g00830	-4.74636	1.89e-08	1.25e-06	0.204705	7.28231	up
FvH4_5g02070	-1.56431	1.92e-08	1.26e-06	4.9028	17.979	up	ATSR,SR	serine racemase
FvH4_1g26280	-1.44193	1.94e-08	1.27e-06	0.926106	3.14032	up	ABCB4,ATPGP4,MDR4,PGP4	ATP binding cassette subfamily B4
FvH4_3g06000	-1.10345	1.97e-08	1.28e-06	71.2072	188.282	up		basic helix-loop-helix (bHLH) DNA-binding superfamily protein
FvH4_7g12282	-1.45876	2.18e-08	1.41e-06	3.33756	11.2344	up	CYP704A2	cytochrome P450, family 704, subfamily A, polypeptide 2
FvH4_3g45780	-2.5491	2.25e-08	1.45e-06	1.07533	7.30631	up
FvH4_2g36010	-3.1746	2.29e-08	1.47e-06	0.429603	4.24981	up		Tetraspanin family protein
FvH4_1g20820	-1.11854	2.7e-08	1.71e-06	39.4309	108.691	up
FvH4_3g23270	-4.06778	3.79e-08	2.33e-06	0.383546	7.88396	up
FvH4_4g31450	-2.39308	4.16e-08	2.54e-06	0.570295	3.6893	up	PKS1	phytochrome kinase substrate 1
FvH4_5g20940	-7.28882	4.55e-08	2.75e-06	0	2.95751	up		Plant invertase/pectin methylesterase inhibitor superfamily protein
FvH4_2g31850	-1.60194	4.59e-08	2.77e-06	13.9527	53.3009	up	ATZIP4,ZIP4	zinc transporter 4 precursor
FvH4_3g23492	-1.59033	4.95e-08	2.97e-06	1.49184	5.71075	up	UBP12	ubiquitin-specific protease 12
FvH4_3g03190	-1.59133	5e-08	2.99e-06	9.31088	34.3781	up
FvH4_2g03602	-3.66805	5.35e-08	3.15e-06	0.304023	3.52078	up		PHD finger transcription factor, putative
FvH4_6g22310	-1.00798	5.35e-08	3.15e-06	14.2019	35.5482	up		Protein phosphatase 2C family protein
FvH4_1g00410	-2.00505	6.01e-08	3.52e-06	1.47367	6.80402	up		UDP-Glycosyltransferase superfamily protein
FvH4_6g04990	-1.14461	6e-08	3.52e-06	17.0213	46.8192	up	RBK2	ROP binding protein kinases 2
FvH4_2g27180	-3.36697	6.14e-08	3.57e-06	0.812566	9.11271	up	ARR9,ATRR4	response regulator 9
FvH4_7g12870	-2.31592	6.28e-08	3.64e-06	1.17472	6.66471	up		AP2/B3-like transcriptional factor family protein
FvH4_4g29810	-1.82817	6.4e-08	3.69e-06	65.8607	313.674	up	CYP78A5,KLU	cytochrome P450, family 78, subfamily A, polypeptide 5
FvH4_2g22040	-6.14785	6.77e-08	3.87e-06	0.0469339	3.99993	up	ATZFP11,ZFP11	zinc finger protein 11
FvH4_3g03590	-1.6869	7.37e-08	4.15e-06	6.49634	24.8468	up	B120	S-locus lectin protein kinase family protein
FvH4_1g12717	-2.01542	9.12e-08	5.06e-06	1.48835	5.2248	up		P-loop containing nucleoside triphosphate hydrolases superfamily protein
FvH4_5g20950	-3.47814	9.24e-08	5.12e-06	0.475524	6.32518	up		Plant invertase/pectin methylesterase inhibitor superfamily protein
FvH4_3g25790	-1.72105	1e-07	5.49e-06	3.27819	12.9063	up
FvH4_5g31070	-1.16084	1.08e-07	5.87e-06	7.53208	21.4908	up		Tetratricopeptide repeat (TPR)-like superfamily protein
FvH4_2g40620	-1.70012	1.13e-07	6.16e-06	1.5372	6.25824	up	ATS,KAN4	Homeodomain-like superfamily protein
FvH4_7g22284	-1.71339	1.14e-07	6.21e-06	4.93132	19.6665	up	ATHSP70,HSP70	heat shock protein 70
FvH4_6g19450	-1.52552	1.17e-07	6.3e-06	5.20815	18.2183	up	ATAN11,LWD1	Transducin/WD40 repeat-like superfamily protein
FvH4_7g13290	-2.93363	1.39e-07	7.38e-06	0.335438	2.91889	up		S-adenosyl-L-methionine-dependent methyltransferases superfamily protein
FvH4_3g13530	-1.56713	1.41e-07	7.45e-06	13.9326	49.3308	up		CTP synthase family protein
FvH4_4g35150	-2.56142	1.47e-07	7.78e-06	0.806401	6.17672	up		Transducin/WD40 repeat-like superfamily protein
FvH4_1g27290	-1.8818	1.61e-07	8.43e-06	10.6402	45.6355	up
FvH4_6g28220	-1.01459	1.7e-07	8.89e-06	7.33459	18.378	up		Eukaryotic aspartyl protease family protein
FvH4_7g22280	-1.11885	1.85e-07	9.6e-06	2.71235	7.26977	up	ERD2,HSP70T-1	heat shock protein 70 (Hsp 70) family protein
FvH4_6g00860	-1.29805	1.99e-07	1.03e-05	0.711709	2.22901	up	emb1507	U5 small nuclear ribonucleoprotein helicase, putative
FvH4_2g03600	-2.78927	2.11e-07	1.08e-05	1.75502	14.0351	up		PHD finger transcription factor, putative
FvH4_5g28980	-2.41876	2.12e-07	1.08e-05	1.26043	7.95631	up	AKT2,AKT2/3,AKT3,KT2/3	potassium transport 2/3
FvH4_4g30101	-1.47454	2.56e-07	1.3e-05	1.67955	5.79943	up	ATUPS2,UPS2	ureide permease 2
FvH4_6g34360	-2.15054	2.85e-07	1.44e-05	4.82894	25.0883	up	ATHAP2C,HAP2C,NF-YA3	nuclear factor Y, subunit A3
FvH4_5g18321	-1.71429	2.96e-07	1.49e-05	58.3455	255.624	up		Bifunctional inhibitor/lipid-transfer protein/seed storage 2S albumin superfamily protein
FvH4_3g03740	-1.27764	3.04e-07	1.52e-05	8.05617	23.5557	up	ATENT3,ENT3,FUR1	Major facilitator superfamily protein
FvH4_2g37381	-1.65189	3.21e-07	1.6e-05	8.70643	28.0157	up	SBE2.2	starch branching enzyme 2.2
FvH4_1g24670	-1.60923	3.86e-07	1.89e-05	1.79412	7.00582	up		Copine (Calcium-dependent phospholipid-binding protein) family
FvH4_2g27701	-2.79534	4.08e-07	1.98e-05	0.1465	1.21072	up		disease resistance protein (TIR-NBS-LRR class), putative
FvH4_5g00290	-3.07829	4.11e-07	1.99e-05	0.191119	2.12837	up	ATBETAFRUCT4,VAC-INV	Glycosyl hydrolases family 32 protein
FvH4_1g11810	-1.15726	4.36e-07	2.1e-05	20.2007	56.7708	up	F3'H,F3H,TT6	flavanone 3-hydroxylase
FvH4_6g05060	-1.3336	4.43e-07	2.13e-05	3.1197	8.25439	up	ERD6	Major facilitator superfamily protein
FvH4_1g19194	-2.02621	4.52e-07	2.17e-05	2.18079	10.2611	up		Rhamnogalacturonate lyase family protein
FvH4_3g34990	-3.52367	4.75e-07	2.27e-05	0.281887	3.56972	up		Eukaryotic aspartyl protease family protein
FvH4_7g27132	-1.28844	4.83e-07	2.3e-05	3.05186	9.1602	up		GroES-like zinc-binding alcohol dehydrogenase family protein
FvH4_1g01050	-1.91655	5.18e-07	2.44e-05	2.21174	9.72924	up		Reticulon family protein
FvH4_4g12130	-1.67221	5.18e-07	2.44e-05	3.54983	13.4193	up		P-loop containing nucleoside triphosphate hydrolases superfamily protein
FvH4_5g24510	-1.84649	5.69e-07	2.64e-05	3.24281	13.8956	up		Pectinacetylesterase family protein
FvH4_5g05280	-1.18023	6.38e-07	2.92e-05	36.1877	98.8939	up	ATMYB66,MYB66,WER,WER1	myb domain protein 66
FvH4_1g01771	-1.36023	6.89e-07	3.13e-05	157.459	526.178	up
FvH4_3g35940	-1.21811	7.04e-07	3.18e-05	7.09431	21.0025	up
FvH4_7g04820	-1.19057	7.96e-07	3.57e-05	7.40252	20.4991	up	ZIFL1	zinc induced facilitator-like 1
FvH4_7g25401	-1.31606	9.88e-07	4.32e-05	16.2562	50.6743	up		Heavy metal transport/detoxification superfamily protein
FvH4_4g35880	-1.26258	1.06e-06	4.62e-05	6.95411	20.3314	up	ATNHX7,ATSOS1,SOS1	sodium proton exchanger, putative (NHX7) (SOS1)
FvH4_2g08190	-4.47461	1.13e-06	4.89e-05	0.150181	4.92678	up	DIR1	Bifunctional inhibitor/lipid-transfer protein/seed storage 2S albumin superfamily protein
FvH4_5g28310	-2.57798	1.25e-06	5.34e-05	1.68678	11.4585	up		Protein kinase superfamily protein
FvH4_7g04890	-1.50872	1.28e-06	5.46e-05	2.07007	7.22804	up		DNAse I-like superfamily protein
FvH4_7g19810	-1.91376	1.34e-06	5.66e-05	0.640286	2.50699	up	SCPL27	serine carboxypeptidase-like 27
FvH4_7g22240	-1.77609	1.51e-06	6.29e-05	1.08773	4.55097	up	ATHSP70,HSP70	heat shock protein 70
FvH4_5g35081	-3.4922	1.7e-06	6.98e-05	0.180599	2.63301	up
FvH4_6g04670	-1.01969	1.7e-06	6.98e-05	57.5292	142.943	up	EMB3004,MEE32	dehydroquinate dehydratase, putative / shikimate dehydrogenase, putative
FvH4_7g26790	-1.80562	1.73e-06	7.1e-05	2.54738	11.449	up	CYCP4;1	cyclin p4;1
FvH4_4g26580	-1.0028	1.8e-06	7.36e-05	4.36457	10.9586	up	BAT1	bidirectional amino acid transporter 1
FvH4_4g37260	-1.83247	1.86e-06	7.55e-05	0.75362	3.47858	up		Eukaryotic aspartyl protease family protein
FvH4_2g35900	-1.39459	1.9e-06	7.64e-05	4.7472	15.207	up		alpha/beta-Hydrolases superfamily protein
FvH4_4g11960	-1.55943	1.9e-06	7.64e-05	3.57865	13.0878	up		UDP-Glycosyltransferase superfamily protein
FvH4_5g11460	-1.08362	1.91e-06	7.64e-05	3.15625	8.72846	up	ATTRE1,TRE1	trehalase 1
FvH4_5g25720	-1.07755	1.93e-06	7.71e-05	3.0378	7.89681	up	JK218,NPH3,RPT3	Phototropic-responsive NPH3 family protein
FvH4_2g16940	-2.82174	2e-06	8e-05	0.556554	4.46285	up	XCP1	xylem cysteine peptidase 1
FvH4_2g16810	-1.61047	2.1e-06	8.34e-05	2.98883	10.8505	up	ATGLR3.2,ATGLUR2,GLR3.2,GLUR2	glutamate receptor 2
FvH4_5g06130	-1.60726	2.11e-06	8.34e-05	0.80407	2.98984	up	ATFRO8,FRO8	ferric reduction oxidase 8
FvH4_3g05400	-1.44338	2.32e-06	9.08e-05	10.5838	34.1263	up		O-Glycosyl hydrolases family 17 protein
FvH4_3g07900	-1.80812	2.35e-06	9.16e-05	0.75368	3.1077	up		ARM repeat superfamily protein
FvH4_7g22270	-1.21818	2.48e-06	9.63e-05	6.77177	19.7843	up	AT-HSC70-1,HSC70,HSC70-1,HSP70-1	heat shock cognate protein 70-1
FvH4_5g03800	-2.10155	2.5e-06	9.69e-05	1.4468	7.15846	up	ATMRP14,MRP14	multidrug resistance-associated protein 14
FvH4_6g04320	-1.19462	2.54e-06	9.79e-05	4.37114	12.3757	up		Frigida-like protein
FvH4_3g09450	-1.46283	2.86e-06	0.00010929	22.2422	73.1313	up
FvH4_3g13840	-1.48662	2.98e-06	0.00011358	4.895	16.2715	up	ECT8	evolutionarily conserved C-terminal region 8
FvH4_1g13970	-1.317	3.11e-06	0.00011796	12.7435	38.8704	up		UDP-Glycosyltransferase superfamily protein
FvH4_7g07710	-1.48577	3.15e-06	0.00011886	5.72853	21.3289	up
FvH4_3g39131	-3.25798	3.23e-06	0.00012143	0.188264	2.69862	up		Ribonuclease H-like superfamily protein
FvH4_2g23440	-1.65634	3.32e-06	0.00012391	0.430926	1.73205	up	ABC33,ATCPS1,CPS,CPS1,GA1	Terpenoid cyclases/Protein prenyltransferases superfamily protein
FvH4_1g02150	-1.68715	3.49e-06	0.00012967	0.922699	3.67206	up		2-oxoglutarate (2OG) and Fe(II)-dependent oxygenase superfamily protein
FvH4_4g35921	-2.3616	3.53e-06	0.00013119	1.82609	12.6701	up		Bifunctional inhibitor/lipid-transfer protein/seed storage 2S albumin superfamily protein
FvH4_4g14940	-3.77999	3.82e-06	0.00014045	0.174037	2.77862	up		Protein of unknown function (DUF3049)
FvH4_3g20430	-1.38207	3.83e-06	0.0001406	6.84352	21.7643	up	SDE5	silencing defective 5
FvH4_6g47520	-1.35638	3.87e-06	0.00014201	12.354	40.7743	up	ATCNGC2,CNGC2,DND1	Cyclic nucleotide-regulated ion channel family protein
FvH4_3g21140	-1.78232	4.31e-06	0.00015644	0.84029	3.41512	up	ATDGK5,DGK5	diacylglycerol kinase 5
FvH4_2g16370	-1.43564	4.62e-06	0.00016717	1.36028	4.52261	up		O-fucosyltransferase family protein
FvH4_6g33590	-1.99696	4.76e-06	0.00017143	1.39478	6.53291	up	ATBFRUCT1,ATCWINV1	Glycosyl hydrolases family 32 protein
FvH4_3g43991	-1.93354	4.88e-06	0.00017527	1.50015	6.61372	up		NB-ARC domain-containing disease resistance protein
FvH4_4g25500	-1.32476	4.93e-06	0.00017683	5.97259	17.9829	up		MATE efflux family protein
FvH4_4g24900	-1.72728	4.95e-06	0.00017691	4.0906	15.8275	up		Leucine-rich repeat protein kinase family protein
FvH4_3g17580	-1.75463	4.98e-06	0.00017794	0.965971	3.53847	up		F-box/RNI-like/FBD-like domains-containing protein
FvH4_3g05310	-1.54731	5.06e-06	0.00018019	9.15338	36.1452	up	AtRLP29,RLP29	receptor like protein 29
FvH4_7g22581	-2.99327	5.3e-06	0.00018738	0.50117	5.67119	up
FvH4_6g41680	-1.35517	5.4e-06	0.00019028	7.15072	21.9459	up	iqd33	IQ-domain 33
FvH4_3g44810	-3.57867	5.96e-06	0.00020742	0.162746	2.04314	up		Family of unknown function (DUF716)
FvH4_6g47460	-1.48451	6.03e-06	0.00020928	2.30005	8.05418	up
FvH4_6g53960	-1.2027	6.03e-06	0.00020928	4.61504	13.1606	up	PBS1	Protein kinase superfamily protein
FvH4_5g05610	-1.17348	6.17e-06	0.00021329	0.905051	2.5545	up	GSO1	Leucine-rich repeat transmembrane protein kinase
FvH4_1g18530	-1.00407	6.66e-06	0.00022945	21.0071	53.1146	up	HAT22	Homeobox-leucine zipper protein family
FvH4_4g15660	-1.4232	7.23e-06	0.00024794	3.46761	11.2943	up	ATOFP16,OFP16	ovate family protein 16
FvH4_6g08870	-1.07134	7.55e-06	0.00025791	6.92545	18.7985	up		Tetratricopeptide repeat (TPR)-like superfamily protein
FvH4_6g41500	-4.10265	7.84e-06	0.00026662	8.36062	163.168	up
FvH4_2g34780	-1.44622	8.04e-06	0.00027147	1.36936	4.53641	up	PLA,IIA,PLA2A,PLP2	phospholipase A 2A
FvH4_7g20510	-1.94057	8.33e-06	0.00027951	0.982022	4.62888	up	ATCNGC1,CNGC1	cyclic nucleotide gated channel 1
FvH4_7g27860	-2.03927	8.43e-06	0.00028234	0.509216	2.45693	up		P-loop containing nucleoside triphosphate hydrolases superfamily protein
FvH4_3g28690	-1.10633	8.64e-06	0.00028905	13.2654	34.8412	up		myosin-related
FvH4_5g05780	-1.16811	8.67e-06	0.00028953	13.3202	38.6194	up		Leucine-rich receptor-like protein kinase family protein
FvH4_1g16130	-4.75036	8.81e-06	0.00029361	0.0687299	2.69742	up	HEC2	basic helix-loop-helix (bHLH) DNA-binding superfamily protein
FvH4_6g04460	-2.24557	9.31e-06	0.00030991	0.515706	2.7188	up
FvH4_2g17410	-2.55925	9.47e-06	0.00031473	1.56678	9.94077	up
FvH4_3g14131	-2.29509	9.51e-06	0.00031546	0.66749	4.17876	up	ATKS,ATKS1,GA2,KS,KS1	Terpenoid cyclases/Protein prenyltransferases superfamily protein
FvH4_2g15730	-1.23084	9.92e-06	0.00032705	1.69263	4.47505	up		Major facilitator superfamily protein
FvH4_6g30300	-1.19027	1.07e-05	0.00035043	6.26635	18.3711	up	DMT7,DRM2	domains rearranged methyltransferase 2
FvH4_6g08100	-1.83623	1.13e-05	0.00036412	8.85875	36.6783	up
FvH4_6g10440	-1.4465	1.13e-05	0.00036437	4.68232	16.6396	up	AGT3	alanine:glyoxylate aminotransferase 3
FvH4_2g38140	-1.03258	1.18e-05	0.0003766	5.60996	14.1852	up		SBP (S-ribonuclease binding protein) family protein
FvH4_2g06880	-1.29268	1.21e-05	0.00038804	9.06011	27.0168	up		Homeodomain-like superfamily protein
FvH4_5g38080	-1.38799	1.27e-05	0.00040431	1.20228	3.86951	up	AST56,SULTR2;2	STAS domain / Sulfate transporter family
FvH4_3g43990	-6.18132	1.36e-05	0.00043057	0	2.1089	up	ATARCA,RACK1A,RACK1A_AT	Transducin/WD40 repeat-like superfamily protein
FvH4_5g09020	-1.10455	1.43e-05	0.00044929	3.38045	8.93183	up		DNA binding;ATP binding
FvH4_6g31230	-2.81547	1.55e-05	0.00048606	0.551244	4.64336	up		Late embryogenesis abundant (LEA) hydroxyproline-rich glycoprotein family
FvH4_6g29760	-5.34248	1.59e-05	0.00049493	0.0484763	2.33306	up		Protein of unknown function (DUF567)
FvH4_5g35080	-1.56106	1.61e-05	0.00049894	1.62083	6.1219	up		Tetratricopeptide repeat (TPR)-like superfamily protein
FvH4_6g09700	-1.34937	1.67e-05	0.00051637	13.4206	41.0731	up	ALA1	aminophospholipid ATPase 1
FvH4_7g22282	-1.02782	1.79e-05	0.00054518	2.83137	7.52232	up	AT-HSC70-1,HSC70,HSC70-1,HSP70-1	heat shock cognate protein 70-1
FvH4_5g22170	-2.27493	1.82e-05	0.00055165	1.33278	7.56407	up	ATHSP101,HOT1,HSP101	heat shock protein 101
FvH4_6g42450	-1.74436	1.84e-05	0.00055797	8.03473	30.9662	up		Major facilitator superfamily protein
FvH4_7g00060	-1.99873	1.86e-05	0.00056312	2.05664	9.82979	up		Bifunctional inhibitor/lipid-transfer protein/seed storage 2S albumin superfamily protein
FvH4_5g06576	-2.07973	2.12e-05	0.00063408	0.514697	2.50496	up	CYP71A25	cytochrome P450, family 71, subfamily A, polypeptide 25
FvH4_1g10180	-2.47723	2.15e-05	0.00064242	0.273632	1.86261	up		Auxin efflux carrier family protein
FvH4_5g10290	-1.38571	2.15e-05	0.00064242	1.37318	4.56031	up		Nucleoporin autopeptidase
FvH4_3g36250	-1.53203	2.18e-05	0.00064776	4.78771	16.4038	up		XH/XS domain-containing protein
FvH4_5g21090	-1.9299	2.3e-05	0.00067856	0.704157	3.41299	up	DIN9,PMI2	Mannose-6-phosphate isomerase, type I
FvH4_1g01190	-1.34747	2.3e-05	0.00067889	1.62331	5.09965	up		Calcineurin-like metallo-phosphoesterase superfamily protein
FvH4_3g02630	-1.94493	2.34e-05	0.00068656	1.28144	6.3594	up	XTH8	xyloglucan endotransglucosylase/hydrolase 8
FvH4_7g24950	-1.05555	2.47e-05	0.00072336	4.75613	12.3414	up		Leucine-rich repeat protein kinase family protein
FvH4_4g27450	-3.85334	2.59e-05	0.00075392	0.100447	1.59926	up
FvH4_1g26630	-3.73721	2.75e-05	0.00079434	0.267964	4.07513	up
FvH4_6g28290	-1.26945	2.84e-05	0.00081428	1.24945	3.6247	up		zinc ion binding
FvH4_6g20510	-2.10704	2.9e-05	0.00082859	1.17194	5.8815	up	ATHAP2B,HAP2B,NF-YA2,UNE8	nuclear factor Y, subunit A2
FvH4_1g14660	-1.06848	2.94e-05	0.00083604	13.9736	35.797	up	REM39,VRN1	AP2/B3-like transcriptional factor family protein
FvH4_5g16480	-1.45321	2.93e-05	0.00083604	3.59456	11.2175	up	UGT74B1	UDP-glucosyl transferase 74B1
FvH4_1g17510	-1.06544	3.29e-05	0.00092158	10.1224	25.4791	up	ATBT4,BT4	BTB and TAZ domain protein 4
FvH4_6g38450	-2.66857	3.38e-05	0.00094269	11.7021	20.9302	up	AB140,CAB1,CAB140,LHCB1.3	chlorophyll A/B binding protein 1
FvH4_6g49380	-1.09548	3.41e-05	0.00095136	10.1673	26.5476	up		Phosphoglycerate mutase-like family protein
FvH4_7g15600	-1.31108	3.51e-05	0.00097402	4.60562	13.6793	up		UDP-Glycosyltransferase superfamily protein
FvH4_2g17381	-2.83752	3.65e-05	0.00100954	0.609733	4.41264	up		NB-ARC domain-containing disease resistance protein
FvH4_2g33770	-1.29181	3.92e-05	0.00107671	74.9295	233.797	up		N-terminal nucleophile aminohydrolases (Ntn hydrolases) superfamily protein
FvH4_1g20230	-1.20303	3.94e-05	0.00107981	84.2033	228.971	up	ATHB6,HB6	homeobox protein 6
FvH4_7g07720	-1.23657	4.27e-05	0.00116184	216.949	681.291	up		AP2/B3-like transcriptional factor family protein
FvH4_4g27330	-1.63608	4.34e-05	0.00117963	6.61511	26.939	up	RBCS1A	ribulose bisphosphate carboxylase small chain 1A
FvH4_5g37900	-1.62197	4.62e-05	0.00123994	1.50202	5.41832	up	ANAC002,ATAF1	NAC (No Apical Meristem) domain transcriptional regulator superfamily protein
FvH4_5g35320	-1.60761	4.69e-05	0.00125611	1.40676	5.43098	up		Tetratricopeptide repeat (TPR)-like superfamily protein
FvH4_1g03680	-2.23085	4.89e-05	0.00130253	0.63445	3.59046	up		Lactoylglutathione lyase / glyoxalase I family protein
FvH4_1g23082	-1.13447	5.07e-05	0.00134468	13.4281	35.9038	up	ATWRKY13,WRKY13	WRKY DNA-binding protein 13
FvH4_3g36302	-1.83538	5.36e-05	0.00141345	0.797328	3.49499	up
FvH4_2g28650	-1.1244	5.48e-05	0.00143945	0.862886	2.40862	up	TPR1	TOPLESS-related 1
FvH4_4g02162	-1.69041	5.75e-05	0.00150102	2.66674	10.4456	up		acylaminoacyl-peptidase-related
FvH4_6g20800	-1.2555	6.35e-05	0.00164306	2.06249	5.75223	up		S-locus lectin protein kinase family protein
FvH4_7g18260	-2.12483	7.03e-05	0.00179294	0.440422	1.90931	up	anac028,NAC028	NAC domain containing protein 28
FvH4_6g02900	-1.01437	7.41e-05	0.0018634	12.4735	33.0429	up	UNE12	basic helix-loop-helix (bHLH) DNA-binding superfamily protein
FvH4_5g28373	-2.46257	7.92e-05	0.00197583	0.347109	2.56267	up		P-loop containing nucleoside triphosphate hydrolases superfamily protein
FvH4_6g07660	-1.17481	8.17e-05	0.00202922	13.4312	37.506	up
FvH4_1g17390	-1.69118	8.3e-05	0.00205308	5.35355	18.3572	up		Acetamidase/Formamidase family protein
FvH4_3g36252	-1.76816	8.38e-05	0.00206862	8.96399	35.8403	up		XH/XS domain-containing protein
FvH4_3g27050	-2.01582	8.52e-05	0.00209516	6.51627	30.6107	up		Thioesterase superfamily protein
FvH4_2g32060	-1.10357	8.91e-05	0.00218206	12.6808	32.7643	up	ATH1	homeobox gene 1
FvH4_4g16850	-1.62741	9.67e-05	0.00235003	0.390493	1.4764	up		inosine-uridine preferring nucleoside hydrolase family protein
FvH4_2g05604	-1.87449	9.74e-05	0.00236164	0.572076	3.14506	up	UGT73B3	UDP-glucosyl transferase 73B3
FvH4_5g07280	-1.39563	9.82e-05	0.00237692	18.7334	58.2739	up		AP2/B3-like transcriptional factor family protein
FvH4_5g27180	-1.27008	9.94e-05	0.00239966	6.30634	18.2496	up		Polyketide cyclase/dehydrase and lipid transport superfamily protein
FvH4_4g20990	-1.48587	0.00010374	0.00249162	2.86212	9.48192	up		Pectin lyase-like superfamily protein
FvH4_3g23510	-1.68637	0.00010433	0.00250272	3.20629	13.9599	up
FvH4_1g23232	-1.04547	0.00010498	0.00251259	3.21053	7.92644	up	EMB3004,MEE32	dehydroquinate dehydratase, putative / shikimate dehydrogenase, putative
FvH4_2g14270	-2.07147	0.00010805	0.00258309	1.30531	6.09963	up	IDL4	inflorescence deficient in abscission (IDA)-like 4
FvH4_6g10020	-1.07106	0.00011116	0.00263913	5.24929	13.4222	up	CAD1	MAC/Perforin domain-containing protein
FvH4_6g17410	-1.44014	0.00011106	0.00263913	0.995716	3.38221	up		Sulfite exporter TauE/SafE family protein
FvH4_5g13341	-1.28389	0.00011555	0.00273751	9.19027	26.2959	up	BIM1	basic helix-loop-helix (bHLH) DNA-binding superfamily protein
FvH4_7g20540	-1.54634	0.00011733	0.00277267	1.75623	6.04767	up	chr31	chromatin remodeling 31
FvH4_5g37880	-1.95439	0.00011873	0.00280256	0.920621	4.01761	up	anac047,NAC047	NAC domain containing protein 47
FvH4_4g26051	-2.17706	0.00012595	0.00295604	1.01778	5.42075	up	MENG	S-adenosyl-L-methionine-dependent methyltransferases superfamily protein
FvH4_3g17851	-1.3882	0.00013038	0.00304622	1.26946	4.24366	up		Leucine-rich repeat transmembrane protein kinase
FvH4_3g34270	-1.68434	0.00013281	0.00308895	2.6497	9.98342	up	JK224,NPH1,PHOT1,RPT1	phototropin 1
FvH4_6g07700	-4.03839	0.00013333	0.00309762	0.0339523	0.996395	up		RNA ligase/cyclic nucleotide phosphodiesterase family protein
FvH4_1g25160	-1.18883	0.00013424	0.00311161	6.43767	18.0646	up		Eukaryotic aspartyl protease family protein
FvH4_2g24830	-1.09645	0.00013841	0.00320113	4.80193	13.1889	up		RNA-binding ASCH domain protein
FvH4_6g38290	-1.91582	0.00014365	0.00330011	0.898208	4.24612	up		Carbohydrate-binding X8 domain superfamily protein
FvH4_4g37100	-1.07432	0.00015252	0.00346918	2.96878	7.65706	up	SDE3	P-loop containing nucleoside triphosphate hydrolases superfamily protein
FvH4_4g09340	-1.72524	0.00015766	0.00356825	2.97799	11.95	up	4CL2,AT4CL2	4-coumarate:CoA ligase 2
FvH4_1g17530	-1.48734	0.00016262	0.00365847	2.85159	9.16646	up	CYCD5;1	cyclin d5;1
FvH4_2g13100	-1.6378	0.00016971	0.003789	3.0794	12.7606	up		Protein of unknown function (DUF3511)
FvH4_1g09090	-1.09975	0.00018099	0.00399741	19.5003	49.6607	up		Protein of unknown function (DUF581)
FvH4_6g04431	-1.16111	0.00018305	0.00402135	9.86087	26.9264	up		Frigida-like protein
FvH4_7g24760	-1.83706	0.00018296	0.00402135	1.76335	7.7919	up	ABI4,ATABI4,GIN6,ISI3,SAN5,SIS5,SUN6	Integrase-type DNA-binding superfamily protein
FvH4_3g18340	-1.52921	0.00019431	0.00425066	2.87255	10.7278	up	LSH10	Protein of unknown function (DUF640)
FvH4_5g36290	-1.98575	0.00019513	0.00426411	0.561939	2.55333	up		Protein kinase family protein with leucine-rich repeat domain
FvH4_7g03200	-1.09821	0.00019646	0.00428146	1.92238	5.00027	up		Phosphatidylinositol-4-phosphate 5-kinase family protein
FvH4_6g15372	-1.27703	0.00020154	0.00436706	3.95148	11.7259	up	RIP3	ROP interactive partner 3
FvH4_3g43910	-5.40128	0.00020458	0.00442753	0.0348833	3.06316	up
FvH4_2g18570	-1.15668	0.00021089	0.00453157	0.959642	2.75524	up		Vacuolar iron transporter (VIT) family protein
FvH4_4g15662	-2.10769	0.00021168	0.00454258	0.553934	2.91712	up
FvH4_4g27390	-2.12912	0.00021949	0.00468214	0.588445	2.71638	up		B-box type zinc finger protein with CCT domain
FvH4_1g18930	-1.02572	0.00022432	0.00477039	94.7027	230.112	up	bHLH093	beta HLH protein 93
FvH4_1g26130	-1.06776	0.00022712	0.00481017	4.38116	11.5234	up
FvH4_6g44840	-1.23119	0.00024183	0.00507272	1.81582	5.19588	up
FvH4_7g00440	-1.05445	0.00024198	0.00507272	70.1089	174.736	up	ATLOX2,LOX2	lipoxygenase 2
FvH4_4g26060	-2.43351	0.00024376	0.00509975	0.476408	2.56685	up	MENG	S-adenosyl-L-methionine-dependent methyltransferases superfamily protein
FvH4_6g00200	-1.09487	0.00024598	0.00514098	4.51493	11.6026	up	ATDCL2,DCL2	dicer-like 2
FvH4_5g35310	-1.73086	0.00024637	0.00514372	0.649536	2.67406	up
FvH4_6g19560	-1.09489	0.00025392	0.00525349	7.67795	21.1302	up		AP2/B3-like transcriptional factor family protein
FvH4_2g27960	-1.15726	0.00026093	0.00535032	2.93365	8.08679	up	NDH-M	subunit NDH-M of NAD(P)H:plastoquinone dehydrogenase complex
FvH4_4g20230	-1.55279	0.00026166	0.00535985	1.54407	5.23409	up	ATWRKY48,WRKY48	WRKY DNA-binding protein 48
FvH4_2g28070	-1.37126	0.00026432	0.00539584	10.7791	36.9227	up
FvH4_6g39983	-1.82583	0.00026619	0.00542028	1.8211	7.10141	up	LAC14	laccase 14
FvH4_3g05590	-2.34203	0.00027274	0.00553187	0.46575	2.74765	up	ATIPT1,IPT1	isopentenyltransferase 1
FvH4_4g29660	-1.10574	0.0002758	0.00557745	5.23626	13.5854	up		DNA binding
FvH4_4g12160	-1.20964	0.0002838	0.00572805	1.56893	4.38275	up		DNA binding;ATP binding
FvH4_2g37840	-1.59975	0.00029185	0.00586747	0.548199	2.1464	up	AMY2,ATAMY2	alpha-amylase-like 2
FvH4_2g01590	-1.49921	0.00029483	0.00591588	1.30892	4.70569	up	ARO1	armadillo repeat only 1
FvH4_6g06190	-1.08835	0.00030194	0.00604083	56.8972	145.095	up	ATCUL1,AXR6,CUL1	cullin 1
FvH4_4g01760	-1.39197	0.00030437	0.00607646	1.82094	5.66846	up	CML11	calmodulin-like 11
FvH4_7g09550	-1.41418	0.00031201	0.00619427	3.3903	11.8157	up		Integrase-type DNA-binding superfamily protein
FvH4_7g26420	-1.73486	0.00031629	0.00626712	0.675004	2.92416	up	HR3,MLA10	homolog of RPW8 3
FvH4_3g03720	-1.84068	0.00033359	0.00655321	1.52527	6.52162	up	CYCD6;1	Cyclin D6;1
FvH4_1g13570	-1.07539	0.00034647	0.00675977	4.3137	11.2845	up		ARM repeat superfamily protein
FvH4_3g03730	-1.17432	0.0003505	0.00681387	4.29986	12.3245	up		Octicosapeptide/Phox/Bem1p family protein
FvH4_4g07930	-1.1138	0.00037328	0.00722941	23.3951	60.624	up	scpl18	serine carboxypeptidase-like 18
FvH4_1g15820	-1.62163	0.00037612	0.00727756	1.72982	6.6005	up	ICK2,KRP2	KIP-related protein 2
FvH4_7g17950	-2.59347	0.00038533	0.00742111	0.855388	2.09598	up	anac028,NAC028	NAC domain containing protein 28
FvH4_2g12101	-2.00438	0.00039046	0.0074849	0.459834	2.61106	up	TPX2	targeting protein for XKLP2
FvH4_6g09120	-1.62854	0.00039042	0.0074849	1.29511	4.76423	up		Protein of unknown function (DUF567)
FvH4_7g07390	-1.26381	0.00040348	0.00768431	6.24555	18.8661	up	ATGSTU8,GSTU8	glutathione S-transferase TAU 8
FvH4_7g26470	-1.71608	0.00043023	0.00810393	0.70781	2.85532	up		Agenet domain-containing protein
FvH4_3g43980	-2.36173	0.00043631	0.00817817	0.798979	4.89463	up	RACK1C_AT	receptor for activated C kinase 1C
FvH4_6g41980	-1.46925	0.00043655	0.00817817	1.39472	4.55466	up	MPL1	Myzus persicae-induced lipase 1
FvH4_6g38350	-1.15401	0.00043821	0.00818699	2.09436	5.34046	up	ATKCO6,ATTPK3,KCO6,TPK3	Ca2+ activated outward rectifying K+ channel 6
FvH4_4g22830	-1.09598	0.00045626	0.00848571	4.78167	12.2906	up
FvH4_2g03180	-1.1274	0.00046693	0.00863734	2.23814	6.02065	up	ATSAGT1,GT,SAGT1,SGT1,UGT74F2	UDP-glucosyltransferase 74F2
FvH4_5g38692	-1.70326	0.0004742	0.00874805	7.2498	26.2687	up
FvH4_6g42610	-1.44211	0.0004804	0.00883059	0.779513	2.51371	up		Lycopene beta/epsilon cyclase protein
FvH4_4g20730	-1.23762	0.00048559	0.00890265	2.12915	6.08975	up	ATGA2OX4,ATGA2OX6,DTA1,GA2OX6	gibberellin 2-oxidase 6
FvH4_3g16620	-1.13209	0.00049626	0.00905802	5.29302	13.3359	up		VQ motif-containing protein
FvH4_6g47500	-1.23789	0.00052006	0.00944226	4.22712	11.8203	up		Plant calmodulin-binding protein-related
FvH4_3g03970	-1.72439	0.00052094	0.00944506	0.810379	3.20612	up
FvH4_5g21720	-1.29368	0.00053279	0.00959715	0.875548	2.42944	up	PIRL4	plant intracellular ras group-related LRR 4
FvH4_5g21670	-1.37607	0.00053714	0.00966708	1.18845	3.6961	up	anac071,NAC071	NAC domain containing protein 71
FvH4_5g14470	-1.02666	0.00054686	0.00979881	9.64194	23.7261	up	IBS1	Protein kinase superfamily protein
FvH4_2g32990	-1.89411	0.00056829	0.0101042	1.4834	6.48492	up	NAP1;2,NFA02,NFA2	nucleosome assembly protein 1;2
FvH4_3g37270	-1.1949	0.00057094	0.0101337	1.25498	3.43669	up	UGT76E2	UDP-glucosyl transferase 76E2
FvH4_5g31190	-1.79847	0.00057966	0.0102532	1.64605	6.57695	up
FvH4_4g05730	-1.32201	0.00061722	0.0107789	1.08093	3.62136	up		Leucine-rich repeat receptor-like protein kinase family protein
FvH4_6g04650	-1.58225	0.00063097	0.0110003	0.793022	3.00214	up		FRIGIDA-like protein
FvH4_5g29650	-1.07828	0.0006405	0.0111381	5.36287	13.7465	up		Plant protein of unknown function (DUF639)
FvH4_6g39571	-1.34698	0.00066628	0.0115087	5.87907	17.2663	up
FvH4_2g15070	-1.45008	0.00067676	0.011641	0.769211	2.58909	up
FvH4_2g07300	-1.53435	0.00067864	0.0116561	4.44257	14.9303	up		AP2/B3-like transcriptional factor family protein
FvH4_3g02732	-3.16334	0.00071166	0.01211	0.301928	0.702349	up	CRK25	cysteine-rich RLK (RECEPTOR-like protein kinase) 25
FvH4_1g06290	-1.2897	0.00073562	0.0124867	3.2209	10.3794	up		MATE efflux family protein
FvH4_5g03780	-1.09065	0.00074741	0.0126245	3.22725	8.18791	up		Protein of unknown function (DUF1191)
FvH4_6g05050	-1.52313	0.0007576	0.0127547	8.07477	26.9665	up	SFP2	Major facilitator superfamily protein
FvH4_3g19190	-1.23809	0.00077368	0.0129305	1.38709	4.10546	up
FvH4_3g36251	-1.6809	0.0008002	0.0132874	9.64507	35.6354	up		XH/XS domain-containing protein
FvH4_6g04470	-2.08047	0.00080319	0.0133263	2.10253	9.37312	up	EMB3004,MEE32	dehydroquinate dehydratase, putative / shikimate dehydrogenase, putative
FvH4_3g22910	-2.43862	0.000809	0.0134119	0.353444	2.39168	up		Uncharacterised protein family (UPF0497)
FvH4_2g13810	-1.67886	0.00082417	0.0136088	0.536811	2.12387	up		nodulin MtN21 /EamA-like transporter family protein
FvH4_6g01151	-1.50213	0.00083238	0.0137284	2.87088	8.9405	up
FvH4_1g09040	-1.92855	0.00083824	0.0138079	0.411327	1.97428	up	LHCA2*1,LHCA6	photosystem I light harvesting complex gene 6
FvH4_6g18830	-1.35651	0.00085305	0.0140069	3.14077	10.2613	up	ACA1,ATACA1,CAH1	alpha carbonic anhydrase 1
FvH4_1g14680	-1.15881	0.00087257	0.0142934	0.869064	2.47803	up	REM39,VRN1	AP2/B3-like transcriptional factor family protein
FvH4_6g07171	-1.33365	0.00087591	0.0143367	3.19627	9.0537	up		Protein of unknown function (DUF3511)
FvH4_6g30063	-2.07649	0.00087818	0.0143625	0.87274	3.98486	up	NAP1;3,NFA03,NFA3	nucleosome assembly protein 1;3
FvH4_4g35240	-1.6951	0.0009309	0.0150456	0.411292	1.66573	up	ATFH8,FH8	formin 8
FvH4_7g04070	-2.47957	0.00092991	0.0150456	0.38728	2.38532	up		alpha/beta-Hydrolases superfamily protein
FvH4_4g08700	-1.37663	0.00094278	0.0151899	0.642783	1.98287	up		ENTH/ANTH/VHS superfamily protein
FvH4_2g21774	-1.05606	0.00096122	0.0154507	3.74759	8.00758	up	DMR6	2-oxoglutarate (2OG) and Fe(II)-dependent oxygenase superfamily protein
FvH4_2g11230	-1.19267	0.00099559	0.0158139	1.36603	3.93027	up	ATOPT4,OPT4	oligopeptide transporter 4
FvH4_4g29331	-1.76921	0.00099503	0.0158139	0.750841	2.49274	up	AtSOT1,AtSOT12,ATST1,RAR047,SOT12,ST,ST1	sulphotransferase 12
FvH4_4g25770	-1.27929	0.00100401	0.0159028	1.62973	5.13014	up	ATNRT2.5,NRT2.5	nitrate transporter2.5
FvH4_1g04740	-1.43607	0.00104205	0.0163905	1.28424	4.13861	up		disease resistance protein (TIR-NBS-LRR class), putative
FvH4_1g17891	-1.74075	0.00108743	0.0169763	1.96388	7.85412	up	DG1,EMB1408,EMB246	Tetratricopeptide repeat (TPR)-like superfamily protein
FvH4_4g08030	-1.68309	0.00109403	0.017049	3.82003	15.0613	up
FvH4_2g39560	-1.05369	0.00115674	0.0179091	10.0745	24.96	up	CMT3	chromomethylase 3
FvH4_4g21140	-1.18325	0.00116764	0.0180507	1.41077	3.9328	up		TRAF-like family protein
FvH4_4g18740	-3.21016	0.00119953	0.018433	0.217428	2.36551	up
FvH4_2g26420	-1.06677	0.00123717	0.0188987	4.8931	12.8322	up	CSDP1	cold shock domain protein 1
FvH4_6g36960	-1.29423	0.00124363	0.0189833	12.117	34.7167	up	LPAT2	lysophosphatidyl acyltransferase 2
FvH4_7g19310	-1.01722	0.00128065	0.0193858	4.73502	12.6198	up		Phototropic-responsive NPH3 family protein
FvH4_1g07150	-1.41821	0.00131093	0.0196754	10.2452	32.1878	up	ATET2,ET2	effector of transcription2
FvH4_6g51092	-1.47601	0.0013264	0.0198647	2.57733	8.15546	up		Cytochrome c oxidase subunit Vc family protein
FvH4_3g23750	-1.55251	0.00134436	0.0200602	0.95632	3.55526	up		RmlC-like cupins superfamily protein
FvH4_7g21310	-2.05855	0.00138732	0.0205673	0.454621	2.42226	up		Protein of unknown function (DUF674)
FvH4_7g23600	-1.90574	0.00141684	0.0209296	4.54249	19.8765	up		Bifunctional inhibitor/lipid-transfer protein/seed storage 2S albumin superfamily protein
FvH4_2g39310	-1.15156	0.00141891	0.0209452	2.33795	6.45758	up		TRAM, LAG1 and CLN8 (TLC) lipid-sensing domain containing protein
FvH4_2g21772	-1.00798	0.00147535	0.0215468	2.27259	5.15913	up	DMR6	2-oxoglutarate (2OG) and Fe(II)-dependent oxygenase superfamily protein
FvH4_7g18790	-1.55495	0.00149102	0.0217602	6.67918	22.6069	up	ARK1,CAE1,MRH2	Armadillo/beta-catenin repeat family protein / kinesin motor family protein
FvH4_3g36253	-1.59865	0.00149278	0.0217705	6.52675	22.8142	up		XH/XS domain-containing protein
FvH4_3g42302	-1.92838	0.00149879	0.0218426	0.554964	2.69133	up		F-box family protein
FvH4_2g40710	-1.26883	0.00150606	0.0219021	5.55855	17.9664	up	PDE135	Xanthine/uracil permease family protein
FvH4_4g05820	-3.78758	0.00151459	0.0219796	3.62044	8.55898	up
FvH4_3g00800	-1.35339	0.00152817	0.0221611	2.0783	6.23983	up		Leucine-rich repeat transmembrane protein kinase
FvH4_2g23170	-1.26965	0.0016261	0.0232058	9.0952	26.1592	up		DNAse I-like superfamily protein
FvH4_6g44671	-1.27268	0.00166427	0.0235871	11.172	29.8837	up		DNA polymerase lambda (POLL)
FvH4_7g32500	-1.17875	0.00172054	0.0242511	3.02986	8.24948	up		P-loop containing nucleoside triphosphate hydrolases superfamily protein
FvH4_1g09640	-1.46724	0.00183202	0.0256122	9.5928	36.9354	up	LKR,LKR/SDH,SDH	lysine-ketoglutarate reductase/saccharopine dehydrogenase bifunctional enzyme
FvH4_7g30080	-1.18522	0.001912	0.0264611	1.07634	2.98976	up	ATDTX35,DTX35,FFT	detoxifying efflux carrier 35
FvH4_6g04451	-1.86096	0.00198329	0.0272646	0.897843	2.43871	up
FvH4_4g21560	-1.74483	0.00207416	0.0283437	4.57044	18.8554	up		late embryogenesis abundant domain-containing protein / LEA domain-containing protein
FvH4_4g13682	-2.13338	0.00210455	0.0286261	0.989154	5.16845	up		EXS (ERD1/XPR1/SYG1) family protein
FvH4_3g02772	-1.7874	0.00211228	0.0287122	1.12599	4.55993	up	CRK10,RLK4	cysteine-rich RLK (RECEPTOR-like protein kinase) 10
FvH4_5g29070	-1.12674	0.00212597	0.0288792	25.1446	67.3647	up		Plant L-ascorbate oxidase
FvH4_4g11920	-1.17057	0.00217855	0.0294576	427.044	1313	up	DIR1	Bifunctional inhibitor/lipid-transfer protein/seed storage 2S albumin superfamily protein
FvH4_4g02161	-1.77321	0.00219943	0.029662	5.04918	20.0826	up		acylaminoacyl-peptidase-related
FvH4_6g30860	-2.05832	0.00220721	0.0297281	0.713445	3.47795	up	IAA19,MSG2	indole-3-acetic acid inducible 19
FvH4_6g52090	-1.10275	0.00223864	0.0300924	1.26702	3.22259	up		F-box and associated interaction domains-containing protein
FvH4_5g04072	-1.18558	0.0022735	0.0304548	2.46038	6.61451	up	CIP1	COP1-interactive protein 1
FvH4_3g00920	-1.05586	0.00236544	0.0314076	545.154	1498.88	up
FvH4_6g40900	-1.00597	0.00238418	0.0315295	1.53183	3.94172	up		CCCH-type zinc fingerfamily protein with RNA-binding domain
FvH4_6g04410	-1.3573	0.00239988	0.0316276	0.676329	2.05296	up		Frigida-like protein
FvH4_3g18080	-1.15242	0.0024222	0.0318534	9.86624	25.7117	up		oxidoreductase, zinc-binding dehydrogenase family protein
FvH4_6g03950	-1.12669	0.00243607	0.0319746	10.1882	26.1166	up		P-loop containing nucleoside triphosphate hydrolases superfamily protein
FvH4_2g03560	-1.48733	0.0024382	0.0319821	5.06148	16.0178	up	scpl18	serine carboxypeptidase-like 18
FvH4_1g00420	-1.67243	0.00244297	0.0320243	0.415775	1.60106	up		UDP-Glycosyltransferase superfamily protein
FvH4_4g03650	-1.27485	0.00247598	0.0323747	1.55222	4.80717	up	UGT78D2	UDP-glucosyl transferase 78D2
FvH4_2g29590	-1.8346	0.0025206	0.0327955	0.578005	2.45719	up	AMT2,AMT2;1,ATAMT2	ammonium transporter 2
FvH4_7g21060	-1.9419	0.00252248	0.0327955	0.557273	2.56065	up		disease resistance protein (TIR-NBS-LRR class), putative
FvH4_1g25530	-1.18248	0.00256975	0.0333049	3.48309	9.63873	up		Plant protein of unknown function (DUF869)
FvH4_7g01230	-1.00255	0.00262638	0.0338473	6.88709	16.2571	up
FvH4_4g10700	-1.25077	0.00263071	0.0338819	9.47415	26.3971	up
FvH4_6g05092	-1.80799	0.00268431	0.0344431	2.27378	7.47268	up	SFP1	Major facilitator superfamily protein
FvH4_c17g00090	-2.6447	0.00273656	0.0349611	0.483189	3.1098	up
FvH4_7g23330	-1	0.00274135	0.0350006	2.61614	6.95745	up		Protein of unknown function (DUF668)
FvH4_1g05980	-1.36625	0.00283069	0.0359382	10.0813	30.4126	up		RNA-dependent RNA polymerase family protein
FvH4_3g14116	-1.33893	0.00283223	0.0359382	2.21395	6.5308	up	ATKS,ATKS1,GA2,KS,KS1	Terpenoid cyclases/Protein prenyltransferases superfamily protein
FvH4_4g05260	-1.57621	0.00288434	0.0365544	6.50508	22.4047	up
FvH4_7g34280	-1.4867	0.00292899	0.0370054	0.977107	3.24741	up	RPOD1,SIG1,SIG2,SIGA,SIGB	sigma factor A
FvH4_6g44790	-1.02112	0.00294432	0.0371092	1.82017	4.55156	up	tic20-IV	translocon at the inner envelope membrane of chloroplasts 20-IV
FvH4_6g40584	-1.32469	0.00295541	0.0371867	6.69635	19.5433	up	G6PD2	glucose-6-phosphate dehydrogenase 2
FvH4_5g38691	-1.37024	0.00297839	0.0373786	18.984	57.9612	up
FvH4_4g05860	-3.29942	0.00303159	0.0378615	3.39876	7.69393	up
FvH4_7g24810	-1.72644	0.00302773	0.0378615	5.44754	12.4529	up	LBD21	LOB domain-containing protein 21
FvH4_5g31671	-4.98587	0.00328449	0.0402878	0.108536	0.808468	up		NAD(P)-binding Rossmann-fold superfamily protein
FvH4_7g06406	-2.28266	0.00331073	0.0405373	0.439902	2.46931	up		tRNA synthetase class I (I, L, M and V) family protein
FvH4_5g19190	-1.20056	0.00336486	0.0410293	3.06812	8.27839	up
FvH4_2g12820	-1.15045	0.00342871	0.041611	7.96197	19.9505	up	LAC14	laccase 14
FvH4_5g31920	-1.17406	0.00343568	0.041671	1.47134	3.76531	up	UGT88A1	UDP-glucosyl transferase 88A1
FvH4_5g35760	-1.39705	0.00346839	0.0418616	1.34643	4.13073	up	LAC14	laccase 14
FvH4_6g33840	-1.0721	0.00355828	0.0427056	3.57897	8.66138	up	iqd8	IQ-domain 8
FvH4_5g37341	-1.43372	0.0036479	0.0435528	2.48296	7.62543	up	ZYP1,ZYP1a	Myosin heavy chain-related protein
FvH4_3g27500	-2.23668	0.00370134	0.0440125	0.523466	3.32705	up	AtAUR2,AUR2	ataurora2
FvH4_3g01921	-1.38565	0.00372397	0.0442304	0.562549	1.84396	up	SNL1	SIN3-like 1
FvH4_3g03450	-1.16016	0.00381896	0.045158	1.93891	4.83355	up	SD1-29	S-domain-1 29
FvH4_6g25850	-2.44458	0.0038299	0.045202	0.422594	2.62798	up	AtAUR1,AUR1	ataurora1
FvH4_6g17080	-1.15594	0.00389748	0.0457898	1.76799	6.17784	up	UGT73D1	UDP-glucosyl transferase 73D1
FvH4_7g06404	-1.70795	0.00393843	0.0461847	1.82984	6.25341	up
FvH4_6g28680	-1.50603	0.00401731	0.0467974	3.75648	12.515	up	ATCCR1,CCR1,IRX4	cinnamoyl coa reductase 1
FvH4_6g36640	-1.418	0.00403476	0.0469476	1.26986	4.42862	up	ALPHA-VPE,ALPHAVPE	alpha-vacuolar processing enzyme
FvH4_5g28770	-1.39123	0.00404445	0.0470339	0.645911	2.21415	up	CPSF73-I	cleavage and polyadenylation specificity factor 73-I
FvH4_5g15070	-1.06035	0.00416216	0.0480771	0.759376	1.96533	up		Disease resistance protein (TIR-NBS-LRR class) family
FvH4_5g11450	-1.09851	0.00430654	0.049385	1.83069	4.95506	up		NAD(P)-binding Rossmann-fold superfamily protein
FvH4_6g38580	-2.47574	0.00435385	0.0497062	0.344793	2.08132	up		Cytochrome b561/ferric reductase transmembrane protein family
FvH4_3g04100	4.64063	8.44589e-66	4.35111e-62	49.3067	2.51546	down		Haloacid dehalogenase-like hydrolase (HAD) superfamily protein
FvH4_4g29600	2.61793	1.80636e-48	5.31766e-45	341.719	69.0187	down	AGL7,AP1	K-box region and MADS-box transcription factor family protein
FvH4_2g21310	4.76687	2.88677e-36	4.95731e-33	40.9766	1.88098	down	LSH3	Protein of unknown function (DUF640)
FvH4_6g40300	4.87712	6.02655e-36	9.55301e-33	12.8609	0.564646	down	AIR3	Subtilisin-like serine endopeptidase family protein
FvH4_1g19710	4.35255	2.04995e-35	2.81623e-32	142.809	8.87967	down	AGL22,SVP	K-box region and MADS-box transcription factor family protein
FvH4_6g42800	2.76205	2.84688e-34	3.45092e-31	27.5412	5.27329	down	ATCSLB04,ATCSLB4,CSLB04	cellulose synthase-like B4
FvH4_5g09660	2.90076	1.65369e-33	1.79356e-30	341.729	58.0983	down	LFY,LFY3	floral meristem identity control protein LEAFY (LFY)
FvH4_4g28170	3.89032	2.90062e-33	2.98865e-30	9.78012	0.809272	down	BRC2,TCP12	TCP domain protein 12
FvH4_6g08190	4.31658	8.23221e-32	7.3757e-29	318.625	20.6697	down	ATRL6,RL6,RSM3	RAD-like 6
FvH4_1g11270	2.03628	2.95328e-29	2.09856e-26	84.9113	26.097	down	atbzip14,FD,FD-1	Basic-leucine zipper (bZIP) transcription factor family protein
FvH4_3g06360	3.48603	5.02295e-29	3.33896e-26	36.4767	4.19309	down	ATHB40,HB-5,HB40	homeobox protein 40
FvH4_7g23040	5.88345	3.75143e-27	2.08934e-24	9.1336	0.188485	down	RAB,RBE	C2H2 and C2HC zinc fingers superfamily protein
FvH4_4g02430	4.26218	8.53322e-27	4.62748e-24	159.139	10.6523	down
FvH4_1g18670	2.91874	2.20198e-26	1.16349e-23	9.99226	1.65676	down	HSL2	HAESA-like 2
FvH4_7g05970	5.21686	3.15576e-26	1.62577e-23	5.68727	0.184663	down	PTL	Duplicated homeodomain-like superfamily protein
FvH4_7g28740	3.18395	2.19478e-25	1.02791e-22	8.98965	1.26233	down	AGL42	AGAMOUS-like 42
FvH4_6g17450	3.90988	1.98134e-24	9.07321e-22	34.1896	2.75997	down	ATHB51,HB51,LMI1	homeobox 51
FvH4_1g15510	3.09192	3.08068e-24	1.38008e-21	14.3228	2.13136	down	ASL1,LBD36	ASYMMETRIC LEAVES 2-like 1
FvH4_2g38950	2.22739	2.40096e-21	8.99574e-19	44.5338	11.5193	down	SRS7	SHI-related sequence 7
FvH4_5g10640	4.01235	2.8026e-21	1.03131e-18	8.55021	0.711321	down		GroES-like zinc-binding dehydrogenase family protein
FvH4_4g32970	3.89651	7.97475e-21	2.73893e-18	5.52199	0.506586	down		Kelch repeat-containing F-box family protein
FvH4_7g18021	4.94178	1.8028e-20	5.992e-18	5.28255	0.180852	down
FvH4_5g30170	2.05594	3.87342e-20	1.24718e-17	320.941	100.476	down	ARPN	plantacyanin
FvH4_6g25090	2.43246	6.229e-20	1.97479e-17	57.7677	13.6608	down	BOP2	Ankyrin repeat family protein / BTB/POZ domain-containing protein
FvH4_4g05700	4.04736	4.04533e-19	1.20815e-16	54.7757	4.62167	down
FvH4_6g41660	4.85341	4.65909e-19	1.37157e-16	78.8895	3.78625	down		Glycine-rich protein family
FvH4_3g30950	3.77584	7.1156e-19	2.03654e-16	4.50554	0.413812	down	AtMYB36,MYB36	myb domain protein 36
FvH4_1g18630	3.62564	7.77912e-19	2.19595e-16	11.7676	1.17087	down	ATGER3,GER3,GLP3,GLP3A,GLP3B	germin 3
FvH4_3g34410	3.13626	1.0774e-18	2.96026e-16	7.84484	1.11602	down	PRS,PRS1,WOX3	Homeodomain-like superfamily protein
FvH4_4g32750	2.46887	1.70679e-18	4.56776e-16	42.9918	9.71725	down	MLP28	MLP-like protein 28
FvH4_1g21640	2.59263	2.59503e-17	6.00851e-15	55.6191	11.711	down		Heavy metal transport/detoxification superfamily protein
FvH4_6g23170	3.66636	4.14027e-17	9.37566e-15	12.3248	1.15648	down	NTT,WIP2	C2H2-type zinc finger family protein
FvH4_1g25740	1.71644	6.37159e-17	1.41182e-14	10.8141	4.13256	down		Leucine-rich repeat protein kinase family protein
FvH4_3g21460	3.06335	8.52934e-17	1.86983e-14	200.768	32.128	down	DFL1,GH3.6	Auxin-responsive GH3 family protein
FvH4_1g12330	1.47343	1.27404e-16	2.71254e-14	15.8381	7.2228	down	ROT3	Cytochrome P450 superfamily protein
FvH4_7g26340	3.47363	1.28999e-16	2.71254e-14	25.5136	2.79338	down	CYP714A1	cytochrome P450, family 714, subfamily A, polypeptide 1
FvH4_1g07390	2.40449	1.71466e-16	3.53341e-14	11.5513	2.79078	down	CGA1,GATA22	cytokinin-responsive gata factor 1
FvH4_5g02150	4.45605	1.99279e-16	4.06589e-14	4.15001	0.218724	down	PRS,PRS1,WOX3	Homeodomain-like superfamily protein
FvH4_7g15020	4.15724	3.01486e-16	6.09089e-14	32.8645	2.38428	down		UDP-Glycosyltransferase superfamily protein
FvH4_4g31000	2.37759	3.09948e-16	6.20107e-14	37.2674	9.00687	down	ATMIXTA,ATMYB16,MYB16	myb domain protein 16
FvH4_3g03630	3.19559	4.96264e-16	9.64765e-14	17.1716	2.61935	down	AGL24	AGAMOUS-like 24
FvH4_5g14661	3.55345	4.92652e-16	9.64765e-14	5.34803	0.532282	down	AtMYB106,MYB106,NOK	myb domain protein 106
FvH4_7g28690	4.12554	5.27408e-16	1.01573e-13	5.40771	0.341967	down	AGL6	AGAMOUS-like 6
FvH4_1g08850	2.17795	5.83601e-16	1.11354e-13	40.0873	11.3289	down
FvH4_4g23520	2.3261	6.26837e-16	1.18507e-13	11.3581	2.81113	down		Squamosa promoter-binding protein-like (SBP domain) transcription factor family protein
FvH4_6g08330	2.95636	7.9472e-16	1.4888e-13	1393.71	235.143	down
FvH4_3g23680	2.95081	8.6376e-16	1.60356e-13	236.087	41.6964	down
FvH4_6g01210	2.4225	1.38719e-15	2.52971e-13	55.0431	13.0754	down
FvH4_1g14900	3.52658	7.90935e-15	1.34701e-12	4.40206	0.48583	down	ATMES1,MES1	methyl esterase 1
FvH4_5g09640	2.5346	9.3617e-15	1.58128e-12	13.2368	2.74094	down
FvH4_3g04610	2.54612	1.92881e-14	3.17976e-12	11.7939	2.41289	down	ATCKX5,CKX7	cytokinin oxidase 7
FvH4_1g23990	3.0141	2.11606e-14	3.46077e-12	25.0306	3.66903	down	IDL2	inflorescence deficient in abscission (IDA)-like 2
FvH4_6g06510	1.59788	2.70412e-14	4.31968e-12	131.523	56.3683	down	ATRAD9,RAD9	cell cycle checkpoint control protein family
FvH4_1g14320	2.07496	2.74904e-14	4.35765e-12	5.94846	1.77013	down	BLH2,SAW1	BEL1-like homeodomain 2
FvH4_6g46730	3.27547	2.81627e-14	4.39658e-12	23.3408	2.79015	down	PTF1,TCP13,TFPD	plastid transcription factor 1
FvH4_6g38660	2.55302	3.31172e-14	5.13117e-12	5.48067	1.16423	down		GDSL-like Lipase/Acylhydrolase superfamily protein
FvH4_4g33370	7.18072	3.54089e-14	5.44531e-12	9.23745	0.0885108	down	KNATM	KNOX Arabidopsis thaliana meinox
FvH4_6g35571	2.40001	3.57278e-14	5.45364e-12	6.68739	1.59098	down	GLIP1	GDSL lipase 1
FvH4_6g50600	1.78619	3.71041e-14	5.62209e-12	15.4492	5.46429	down		Protein kinase superfamily protein
FvH4_7g20380	1.87837	5.13647e-14	7.64971e-12	8.54287	2.88855	down	RAP2.7,TOE1	related to AP2.7
FvH4_4g02370	2.40906	1.04112e-13	1.4796e-11	8.06801	1.83147	down
FvH4_6g39813	2.01833	1.29087e-13	1.7853e-11	11.2061	3.59078	down	ATUGT85A1,UGT85A1	UDP-Glycosyltransferase superfamily protein
FvH4_4g29400	2.96259	1.57677e-13	2.16617e-11	7.24728	1.09945	down	BAS1,CYP72B1,CYP734A1	Cytochrome P450 superfamily protein
FvH4_2g03590	3.6993	2.1603e-13	2.92877e-11	11.2544	1.12082	down
FvH4_4g18470	2.50498	2.22352e-13	2.99477e-11	394.712	94.4679	down	ATDI21,DI21	drought-induced 21
FvH4_2g25180	2.20489	2.37905e-13	3.18344e-11	183.5	49.6061	down	ATGSTF13	Glutathione S-transferase family protein
FvH4_4g28250	2.63407	2.4912e-13	3.31201e-11	166.431	35.6933	down		Leucine-rich repeat (LRR) family protein
FvH4_1g16090	2.59494	2.6537e-13	3.50544e-11	10.0546	2.03848	down		Remorin family protein
FvH4_5g13760	2.41885	3.16065e-13	4.12225e-11	8.37286	1.97526	down	AFP3	ABI five binding protein 3
FvH4_5g15110	1.82843	5.40765e-13	6.92146e-11	12.3459	4.42423	down	ATGSTU10,GSTU10	glutathione S-transferase TAU 10
FvH4_6g05540	2.08925	5.39476e-13	6.92146e-11	21.6468	6.2879	down	HAP5C,NF-YC9	nuclear factor Y, subunit C9
FvH4_1g11910	3.44214	5.45971e-13	6.94496e-11	14.4756	1.76838	down	PGA6,WUS,WUS1	Homeodomain-like superfamily protein
FvH4_1g16930	3.22165	6.80516e-13	8.6033e-11	6.46637	0.879376	down	CYP81D8	cytochrome P450, family 81, subfamily D, polypeptide 8
FvH4_2g14860	2.19432	8.13858e-13	1.01643e-10	59.6931	17.0187	down		Nodulin MtN3 family protein
FvH4_2g06670	2.44806	1.27894e-12	1.57815e-10	8.08156	1.95314	down		Protein of unknown function (DUF1645)
FvH4_2g35620	2.49619	1.38833e-12	1.70293e-10	34.1856	8.04027	down	TINY2	Integrase-type DNA-binding superfamily protein
FvH4_5g38280	1.51008	1.54094e-12	1.87894e-10	45.7148	20.1622	down	ATGPAT3,GPAT3	glycerol-3-phosphate acyltransferase 3
FvH4_6g11070	2.72875	1.93313e-12	2.3433e-10	25.1384	5.17933	down	APTX	APRATAXIN-like
FvH4_4g22650	1.96243	2.34416e-12	2.82492e-10	19.2871	6.26574	down		Integrase-type DNA-binding superfamily protein
FvH4_5g16760	2.71807	2.92798e-12	3.48768e-10	18.7463	3.28733	down
FvH4_7g17190	2.27481	3.01736e-12	3.57349e-10	19.6447	5.0456	down	ATRAB-A3,ATRABA3,RABA3	RAB GTPase homolog A3
FvH4_5g33670	3.33473	3.38986e-12	3.96903e-10	3.56462	0.408866	down	ZF14	MATE efflux family protein
FvH4_6g39810	2.51096	3.79084e-12	4.41344e-10	7.14619	1.57928	down	AtUGT85A3,UGT85A3	UDP-glucosyl transferase 85A3
FvH4_1g18270	1.26767	5.25748e-12	6.01894e-10	77.4021	39.5701	down	ANT,CKC,CKC1,DRG	Integrase-type DNA-binding superfamily protein
FvH4_6g42870	2.44747	5.52494e-12	6.29019e-10	4.81935	1.12491	down	ATWRKY6,WRKY6	WRKY family transcription factor
FvH4_6g40310	1.91408	6.14941e-12	6.96269e-10	10.4138	3.32024	down	CLM,CYP90B1,DWF4,PSC1,SAV1,SNP2	Cytochrome P450 superfamily protein
FvH4_4g32250	5.13929	6.49322e-12	7.27206e-10	10.5686	0.384071	down		Heavy metal transport/detoxification superfamily protein
FvH4_3g02670	4.15741	6.5359e-12	7.28029e-10	4.06745	0.310678	down	ATGA2OX8,GA2OX8	gibberellin 2-oxidase 8
FvH4_6g06500	2.13689	6.77233e-12	7.50309e-10	33.027	9.79921	down		Heavy metal transport/detoxification superfamily protein
FvH4_7g24720	2.31697	7.48637e-12	8.24982e-10	10.7811	2.61607	down		basic helix-loop-helix (bHLH) DNA-binding superfamily protein
FvH4_2g35690	2.38816	9.82546e-12	1.06565e-09	7.59837	1.83026	down		Transducin/WD40 repeat-like superfamily protein
FvH4_c6g00070	2.73835	1.37916e-11	1.48022e-09	3.29047	0.601592	down	AtIDD2,IDD2	indeterminate(ID)-domain 2
FvH4_6g15180	1.19698	1.59195e-11	1.691e-09	68.9366	37.7546	down	RAP2.7,TOE1	related to AP2.7
FvH4_2g37340	1.58774	1.61717e-11	1.70898e-09	7.86187	3.22395	down	CYP84A1,FAH1	ferulic acid 5-hydroxylase 1
FvH4_3g43040	2.29834	1.81298e-11	1.90154e-09	57.5579	15.0006	down	NTT,WIP2	C2H2-type zinc finger family protein
FvH4_6g46410	1.49058	1.81785e-11	1.90154e-09	90.4023	38.7761	down	AGL8,FUL	AGAMOUS-like 8
FvH4_5g00500	2.13323	1.84875e-11	1.9241e-09	7.89699	2.34454	down	CYP706A4	cytochrome P450, family 706, subfamily A, polypeptide 4
FvH4_4g26362	1.52201	1.88477e-11	1.95173e-09	7.84611	3.44286	down		MATE efflux family protein
FvH4_2g22520	1.6356	1.94922e-11	2.00838e-09	17.0531	7.03295	down	IAA16	indoleacetic acid-induced protein 16
FvH4_5g16741	2.94078	2.46375e-11	2.5259e-09	13.5487	2.09954	down
FvH4_1g01070	2.08706	2.7749e-11	2.80306e-09	185.161	55.3565	down	ATCIPK6,CIPK6,SIP3,SNRK3.14	SOS3-interacting protein 3
FvH4_3g21500	2.57095	2.94357e-11	2.94457e-09	20.2474	4.54446	down		Protein of unknown function, DUF538
FvH4_4g35920	1.59807	3.3301e-11	3.31514e-09	60.8603	25.6636	down
FvH4_7g16760	1.92335	3.58192e-11	3.54868e-09	19.2274	6.41882	down		AP2/B3-like transcriptional factor family protein
FvH4_2g34870	2.67166	4.43396e-11	4.35099e-09	47.0393	9.09736	down	ATRBP47C,RBP47C	RNA-binding protein 47C
FvH4_3g29640	1.50607	4.87149e-11	4.75767e-09	468.139	207.455	down		Stress responsive A/B Barrel Domain
FvH4_3g16730	2.9376	7.03323e-11	6.8044e-09	72.7268	12.7764	down	ATNCED3,NCED3,SIS7,STO1	nine-cis-epoxycarotenoid dioxygenase 3
FvH4_7g11990	2.99424	8.80489e-11	8.43918e-09	6.15316	1.0621	down	JLO,LBD30	Lateral organ boundaries (LOB) domain family protein
FvH4_7g32261	1.94097	1.15431e-10	1.10124e-08	28.2271	9.16182	down
FvH4_2g25852	2.23035	1.16844e-10	1.10958e-08	27.0109	7.7927	down
FvH4_6g21760	2.14069	1.45788e-10	1.37181e-08	10.4632	2.94392	down	ZFP8	zinc finger protein 8
FvH4_5g10410	2.46858	1.57524e-10	1.4755e-08	9.22885	2.12342	down	NGA1	AP2/B3-like transcriptional factor family protein
FvH4_7g01511	1.83548	2.02121e-10	1.85942e-08	13.9938	4.97653	down		NAD(P)-binding Rossmann-fold superfamily protein
FvH4_3g22890	1.39843	2.69762e-10	2.43815e-08	32.1842	15.5912	down		Protein of unknown function, DUF584
FvH4_3g02030	1.51968	3.5708e-10	3.19928e-08	30.9573	13.1554	down		Protein of unknown function, DUF584
FvH4_5g30890	2.30191	3.63773e-10	3.24514e-08	18.7795	4.6857	down		Chloroplast-targeted copper chaperone protein
FvH4_1g04130	2.11311	4.64631e-10	4.10929e-08	5.98625	1.66696	down		Homeodomain-like superfamily protein
FvH4_5g17710	2.83171	5.55063e-10	4.86731e-08	108.299	20.9418	down
FvH4_6g08620	2.41305	6.83875e-10	5.97144e-08	5.63596	1.27552	down	ATMYB61,MYB61	myb domain protein 61
FvH4_5g03960	3.75548	7.54893e-10	6.53617e-08	27.5002	2.71898	down
FvH4_6g28770	1.92811	8.02284e-10	6.88861e-08	247.355	84.9736	down	CYP77B1	cytochrome P450, family 77, subfamily B, polypeptide 1
FvH4_5g04940	1.633	8.98962e-10	7.65492e-08	55.5712	23.5221	down	KELP	transcriptional coactivator p15 (PC4) family protein (KELP)
FvH4_6g39240	1.72484	9.65515e-10	8.12097e-08	5.94616	2.29426	down		Leucine-rich repeat (LRR) family protein
FvH4_6g26660	1.7167	1.01599e-09	8.47631e-08	7.18948	2.865	down	ATGLK1,GLK1,GPRI1	GBF's pro-rich region-interacting factor 1
FvH4_5g37970	1.42661	1.16668e-09	9.61674e-08	49.9527	23.8138	down		Protein of unknown function (DUF581)
FvH4_2g12940	1.86815	1.17855e-09	9.63745e-08	65.9584	23.1394	down	KCS1	3-ketoacyl-CoA synthase 1
FvH4_5g05880	1.55236	1.33884e-09	1.0905e-07	39.3464	17.6311	down	TAR2	tryptophan aminotransferase related 2
FvH4_2g25210	1.64732	1.37911e-09	1.11887e-07	363.898	152.464	down	ATGSTF5,ATGSTF8,GST6,GSTF8	glutathione S-transferase phi 8
FvH4_6g03740	2.14179	1.41832e-09	1.14617e-07	10.3417	2.83116	down	BIP,BIP2	Heat shock protein 70 (Hsp 70) family protein
FvH4_7g19720	2.37531	1.46265e-09	1.17737e-07	6.16217	1.58148	down		Protein kinase superfamily protein
FvH4_3g08360	1.61165	1.49914e-09	1.20205e-07	30.7999	13.2136	down		UDP-Glycosyltransferase superfamily protein
FvH4_6g01040	1.62548	2.61548e-09	2.03386e-07	543.244	230.792	down
FvH4_6g33980	1.97021	3.02671e-09	2.32729e-07	36.8953	12.2837	down
FvH4_6g08720	2.43292	3.29891e-09	2.52716e-07	347.184	81.0703	down
FvH4_1g27030	3.03748	3.49384e-09	2.66658e-07	18.0621	2.7	down		Zinc-binding ribosomal protein family protein
FvH4_7g25660	2.58249	3.54517e-09	2.68844e-07	3.18107	0.72625	down	ATAZG1,AZG1	AZA-guanine resistant1
FvH4_7g27970	1.72853	3.57475e-09	2.69834e-07	243.242	94.0577	down	EXL3	EXORDIUM like 3
FvH4_4g29640	1.0924	3.77829e-09	2.84158e-07	13.3747	7.72838	down		Squamosa promoter-binding protein-like (SBP domain) transcription factor family protein
FvH4_7g02730	2.35336	3.83035e-09	2.87025e-07	2.44759	0.583997	down	ACD1-LIKE,PTC52,TIC55-IV	ACD1-like
FvH4_4g35790	2.18141	6.11513e-09	4.48621e-07	562.331	168.979	down	ATUGT85A1,UGT85A1	UDP-Glycosyltransferase superfamily protein
FvH4_7g11780	1.50744	6.2422e-09	4.56146e-07	6.68521	2.93304	down	BEN1	NAD(P)-binding Rossmann-fold superfamily protein
FvH4_2g25390	2.56366	6.35085e-09	4.62445e-07	11.5556	2.61379	down		alpha/beta-Hydrolases superfamily protein
FvH4_7g12700	1.8246	7.10811e-09	5.12157e-07	29.751	9.93968	down	AGL20,ATSOC1,SOC1	AGAMOUS-like 20
FvH4_7g20260	1.57338	7.43888e-09	5.34122e-07	29.9731	13.1146	down		RNA-binding (RRM/RBD/RNP motifs) family protein
FvH4_3g19650	2.64649	8.06787e-09	5.77273e-07	63.6065	12.6097	down	SPL4	squamosa promoter binding protein-like 4
FvH4_5g11950	3.43174	8.53845e-09	6.0883e-07	2.78874	0.321706	down	BEE3	BR enhanced expression 3
FvH4_6g02460	1.25086	8.99893e-09	6.39452e-07	561.064	302.673	down	AN3,ATGIF1,GIF,GIF1	SSXT family protein
FvH4_7g30930	1.98907	9.05692e-09	6.41361e-07	7.04411	2.36822	down	CRF4	cytokinin response factor 4
FvH4_6g25410	1.76301	9.62389e-09	6.79177e-07	21.006	7.51338	down		VQ motif-containing protein
FvH4_3g39860	1.34808	1.00347e-08	7.05748e-07	5.72441	2.83754	down		RNI-like superfamily protein
FvH4_1g17370	2.27227	1.23124e-08	8.46304e-07	11.3509	3.01247	down		GRAS family transcription factor
FvH4_7g34200	1.85851	1.23601e-08	8.46304e-07	17.6752	5.90446	down		GroES-like zinc-binding dehydrogenase family protein
FvH4_4g34890	1.41867	1.31601e-08	8.9798e-07	239.337	115.127	down	MLP423	MLP-like protein 423
FvH4_5g32320	1.48398	1.4756e-08	1.00355e-06	17.6127	8.30198	down	ATMYB3,MYB3	myb domain protein 3
FvH4_6g09750	1.4204	1.58818e-08	1.06953e-06	15.8984	7.16925	down	ATWRKY70,WRKY70	WRKY DNA-binding protein 70
FvH4_6g05440	1.43585	1.70304e-08	1.13575e-06	55.3725	26.1147	down		basic helix-loop-helix (bHLH) DNA-binding superfamily protein
FvH4_6g06380	2.56716	2.14254e-08	1.3884e-06	51.2303	10.2347	down	ATRL1,RL1,RSM2	RAD-like 1
FvH4_5g12760	2.98407	2.48062e-08	1.58752e-06	110.057	19.7222	down
FvH4_5g04860	1.25251	2.59706e-08	1.65689e-06	11.5934	5.90193	down		Protein with RING/U-box and TRAF-like domains
FvH4_1g30330	3.37866	2.65889e-08	1.6911e-06	2.03569	0.271351	down	GAD,GAD1	glutamate decarboxylase
FvH4_6g01390	1.99568	2.80158e-08	1.77093e-06	71.1971	22.7027	down		GDSL-like Lipase/Acylhydrolase superfamily protein
FvH4_5g12520	1.82457	2.92959e-08	1.84618e-06	91.7176	34.1419	down		Eukaryotic aspartyl protease family protein
FvH4_7g15950	1.68102	3.03552e-08	1.9071e-06	23.5206	9.31581	down
FvH4_6g14170	1.0242	3.0854e-08	1.93255e-06	85.8454	53.0604	down		NAD(P)-binding Rossmann-fold superfamily protein
FvH4_2g18810	1.51776	3.09541e-08	1.93294e-06	11.0284	4.79771	down		RING/U-box superfamily protein
FvH4_7g17340	2.15755	3.15084e-08	1.96161e-06	13.2836	3.69562	down		SAUR-like auxin-responsive protein family
FvH4_6g45410	3.78984	3.439e-08	2.13456e-06	2.86904	0.214602	down	TCP1	TCP family transcription factor
FvH4_4g04120	1.31292	3.55581e-08	2.20044e-06	38.01	19.5861	down
FvH4_3g18371	1.89041	3.7266e-08	2.29922e-06	3.49825	1.21161	down		D-mannose binding lectin protein with Apple-like carbohydrate-binding domain
FvH4_5g33530	1.75029	3.77657e-08	2.3231e-06	14.2244	5.32829	down	AAP6	amino acid permease 6
FvH4_4g27360	1.72822	3.84629e-08	2.35194e-06	27.499	10.678	down	CLE43	CLAVATA3/ESR-RELATED 43
FvH4_3g21630	1.30483	4.31923e-08	2.62374e-06	41.566	21.676	down		zinc finger protein-related
FvH4_7g15350	1.45156	4.32897e-08	2.62374e-06	8.42144	3.80395	down	AtWRKY22,WRKY22	WRKY family transcription factor
FvH4_4g30780	1.07567	4.69619e-08	2.82141e-06	30.555	18.6566	down	VIK	VH1-interacting kinase
FvH4_5g10710	1.27609	5.14359e-08	3.05458e-06	45.6963	23.0349	down	IQD18	IQ-domain 18
FvH4_3g06513	2.89851	5.24644e-08	3.1067e-06	10.433	2.2753	down	ATSRG1,SRG1	senescence-related gene 1
FvH4_7g20910	2.48784	6.08784e-08	3.55389e-06	5.78487	1.19354	down	KCS19	3-ketoacyl-CoA synthase 19
FvH4_3g30980	1.29675	6.26683e-08	3.63748e-06	20.0591	10.6887	down		AMP-dependent synthetase and ligase family protein
FvH4_6g31950	2.18726	6.6555e-08	3.82033e-06	2.57082	0.669138	down		Transducin/WD40 repeat-like superfamily protein
FvH4_1g24450	2.02834	6.8476e-08	3.90882e-06	5.81932	1.81967	down	PUB25	plant U-box 25
FvH4_1g20090	2.13692	6.88399e-08	3.91874e-06	4.08996	1.13296	down		MATE efflux family protein
FvH4_2g33260	2.46508	6.99503e-08	3.97098e-06	7.47164	1.80824	down	LBD39	LOB domain-containing protein 39
FvH4_6g10140	1.58603	7.0485e-08	3.99034e-06	7.66935	3.0747	down	ATOFP4,OFP4	ovate family protein 4
FvH4_1g10192	2.89258	7.11972e-08	4.01962e-06	2.47119	0.397099	down	ATGLR3.5,GLR3.5,GLR6	glutamate receptor 3.5
FvH4_7g14710	1.0308	7.52224e-08	4.22373e-06	26.8925	16.5619	down	ARATH;BSAS3;1,ATCYSC1,CYSC1	cysteine synthase C1
FvH4_7g03440	1.05615	7.88528e-08	4.41554e-06	56.6302	34.6122	down	DRP4C	Dynamin related protein 4C
FvH4_1g01970	1.56514	8.24697e-08	4.60556e-06	37.2406	15.6129	down
FvH4_6g39380	2.7127	8.62413e-08	4.80317e-06	16.7349	3.67526	down	HYR1	UDP-Glycosyltransferase superfamily protein
FvH4_5g04610	1.57611	9.36332e-08	5.17292e-06	13.8069	5.34408	down
FvH4_1g22180	1.23168	9.75973e-08	5.37751e-06	43.5717	24.0809	down
FvH4_3g44850	1.62651	9.88374e-08	5.43132e-06	28.5135	11.7017	down		Bifunctional inhibitor/lipid-transfer protein/seed storage 2S albumin superfamily protein
FvH4_1g04931	1.3421	1.01646e-07	5.55599e-06	27.3067	13.9449	down
FvH4_1g20400	1.35259	1.16392e-07	6.29527e-06	9.25294	4.42591	down	ABCG11,ATWBC11,COF1,DSO,WBC11	white-brown complex homolog protein 11
FvH4_4g22090	1.60832	1.21219e-07	6.52209e-06	198.361	87.0245	down	EXGT-A1,EXT,XTH4	xyloglucan endotransglucosylase/hydrolase 4
FvH4_5g30240	1.17988	1.2163e-07	6.52716e-06	43.7969	23.4775	down
FvH4_5g08350	2.07593	1.30294e-07	6.9559e-06	6.7212	2.02877	down
FvH4_6g39031	1.56487	1.50734e-07	7.94419e-06	7.02092	2.84281	down	WAKL1	wall associated kinase-like 1
FvH4_3g17990	1.58724	1.55111e-07	8.15403e-06	18.8972	8.02934	down	BEH4	BES1/BZR1 homolog 4
FvH4_2g25860	1.76615	1.59835e-07	8.38098e-06	164.975	58.957	down	AtLEA5,SAG21	senescence-associated gene 21
FvH4_1g07560	1.35931	1.8807e-07	9.76214e-06	51.5085	25.6971	down
FvH4_4g32480	1.50719	1.95598e-07	1.0102e-05	23.835	11.2851	down	scpl50	serine carboxypeptidase-like 50
FvH4_2g38120	1.44261	2.10377e-07	1.07933e-05	77.0415	34.8265	down		GDSL-like Lipase/Acylhydrolase superfamily protein
FvH4_2g29300	1.45074	2.26334e-07	1.15447e-05	19.8141	9.5436	down		Nucleotide-sugar transporter family protein
FvH4_7g27850	1.53821	2.52259e-07	1.28353e-05	128.877	59.42	down		Plant invertase/pectin methylesterase inhibitor superfamily protein
FvH4_3g08341	2.0606	2.70874e-07	1.37147e-05	5.90052	2.00382	down		UDP-Glycosyltransferase superfamily protein
FvH4_2g14570	2.68044	3.01415e-07	1.51176e-05	3.09428	0.585045	down		pathogenesis-related family protein
FvH4_5g00320	1.46692	3.01515e-07	1.51176e-05	213.894	96.0174	down	AFO,FIL,YAB1	Plant-specific transcription factor YABBY family protein
FvH4_1g14980	2.13233	3.15148e-07	1.57246e-05	3.74727	1.04139	down	sks15	SKU5 similar 15
FvH4_3g39160	2.80657	3.40876e-07	1.68857e-05	10.9581	2.38036	down
FvH4_3g12960	2.01345	3.48234e-07	1.72088e-05	159.32	54.3901	down	UFO	F-box family protein
FvH4_6g40170	2.19439	3.71578e-07	1.82747e-05	3.05593	0.819897	down	UNE16	Homeodomain-like superfamily protein
FvH4_7g24410	1.42143	3.79981e-07	1.86435e-05	47.2304	22.8109	down		SGNH hydrolase-type esterase superfamily protein
FvH4_1g21890	1.02121	3.86514e-07	1.88741e-05	168.387	104.707	down
FvH4_3g11120	1.29599	4.19091e-07	2.02728e-05	194.689	100.38	down	LSH6	Protein of unknown function (DUF640)
FvH4_6g22640	1.39263	4.56303e-07	2.18675e-05	141.705	71.0255	down	SPL9	squamosa promoter binding protein-like 9
FvH4_4g19050	2.27368	4.80036e-07	2.28984e-05	39.7326	10.5359	down	MLP423	MLP-like protein 423
FvH4_6g48960	1.51057	4.87309e-07	2.31382e-05	154.367	72.2372	down	ABCB19,ATABCB19,ATMDR1,ATMDR11,ATPGP19,MDR1,MDR11,PGP19	ATP binding cassette subfamily B19
FvH4_3g44751	1.89018	4.99994e-07	2.36859e-05	13.1606	4.72463	down		Disease resistance-responsive (dirigent-like protein) family protein
FvH4_6g14630	1.49526	5.1628e-07	2.43931e-05	15.3472	6.66455	down		Chloroplast-targeted copper chaperone protein
FvH4_1g13200	2.68708	5.32326e-07	2.49878e-05	5.2888	1.17615	down		alpha/beta-Hydrolases superfamily protein
FvH4_2g32310	1.27836	5.45929e-07	2.55101e-05	112.707	60.8862	down		3'-5' exonuclease domain-containing protein / K homology domain-containing protein / KH domain-containing protein
FvH4_6g06330	1.80085	5.49654e-07	2.56261e-05	175.846	65.8534	down	ATCKX6,ATCKX7,CKX6	cytokinin oxidase/dehydrogenase 6
FvH4_6g20040	1.49086	5.51227e-07	2.56414e-05	64.7416	31.1842	down		Putative lysine decarboxylase family protein
FvH4_3g08710	1.58621	5.77395e-07	2.66183e-05	72.0953	32.003	down		Drought-responsive family protein
FvH4_3g09050	2.45676	5.76421e-07	2.66183e-05	11.9432	2.6734	down		basic helix-loop-helix (bHLH) DNA-binding superfamily protein
FvH4_6g19720	2.11036	5.7636e-07	2.66183e-05	16.702	5.38167	down		NAD(P)-binding Rossmann-fold superfamily protein
FvH4_7g26920	2.18802	6.03966e-07	2.77192e-05	4.13614	1.13108	down	ATERF-1,ERF-1	ethylene responsive element binding factor 1
FvH4_4g33960	1.45261	6.23657e-07	2.85593e-05	73.9438	35.2873	down		Plant invertase/pectin methylesterase inhibitor superfamily protein
FvH4_3g31180	1.8861	6.87459e-07	3.13247e-05	45.2259	14.6745	down
FvH4_3g28040	1.50282	6.90734e-07	3.13354e-05	25.3941	11.1465	down	ADS3,FAD5,FADB,JB67	fatty acid desaturase 5
FvH4_5g38350	2.24351	6.91882e-07	3.13354e-05	48.9381	12.6762	down
FvH4_5g15121	1.57457	7.7587e-07	3.49091e-05	15.5458	6.93967	down	ATGSTU10,GSTU10	glutathione S-transferase TAU 10
FvH4_1g02121	1.31121	7.94742e-07	3.56668e-05	6.44411	3.16178	down		2-oxoglutarate (2OG) and Fe(II)-dependent oxygenase superfamily protein
FvH4_3g26900	1.17619	8.07995e-07	3.61179e-05	28.8985	16.3083	down		alpha/beta-Hydrolases superfamily protein
FvH4_5g22360	1.59068	8.85152e-07	3.94812e-05	23.2136	9.6635	down	bHLH071	beta HLH protein 71
FvH4_5g37060	1.93671	8.91378e-07	3.95875e-05	8.78356	2.81268	down		RNA-binding (RRM/RBD/RNP motifs) family protein
FvH4_6g45391	1.13576	9.1952e-07	4.07496e-05	130.679	76.8865	down	DVL3,RTFL21	ROTUNDIFOLIA like 21
FvH4_3g45501	1.73141	9.56614e-07	4.22119e-05	50.3559	19.4913	down		Mitochondrial substrate carrier family protein
FvH4_4g13360	2.02494	9.71143e-07	4.26702e-05	14.2523	4.36729	down		HXXXD-type acyl-transferase family protein
FvH4_7g13150	1.69601	1.01004e-06	4.40971e-05	9.31814	3.63579	down	ATXTH27,EXGT-A3,XTH27	endoxyloglucan transferase A3
FvH4_4g31190	1.40349	1.04199e-06	4.53958e-05	30.9283	15.3884	down	AtMYB117,LOF1,MYB117	myb domain protein 117
FvH4_7g29150	2.81753	1.06389e-06	4.61551e-05	2.80449	0.468833	down	ATC	centroradialis
FvH4_4g26140	1.3459	1.1092e-06	4.7919e-05	45.4929	22.6895	down
FvH4_2g41361	1.18056	1.15243e-06	4.95785e-05	25.504	14.2601	down		Peroxidase superfamily protein
FvH4_4g18890	1.85793	1.20992e-06	5.17277e-05	5.39202	1.92208	down		Chaperone DnaJ-domain superfamily protein
FvH4_7g21300	2.90729	1.28835e-06	5.47403e-05	34.7459	6.6621	down		Protein of unknown function (DUF674)
FvH4_3g08310	1.23644	1.3127e-06	5.566e-05	11.1093	6.01122	down	HB-3,STIP,WOX9	homeobox-3
FvH4_6g49081	1.40219	1.39388e-06	5.87396e-05	25.2683	12.4641	down		Galactose mutarotase-like superfamily protein
FvH4_7g11260	1.29372	1.42676e-06	6.00025e-05	237.766	121.797	down	AFO,FIL,YAB1	Plant-specific transcription factor YABBY family protein
FvH4_2g31640	2.00202	1.43724e-06	6.03203e-05	19.8198	5.84834	down	EDA39	calmodulin-binding family protein
FvH4_5g04833	1.52211	1.45633e-06	6.09971e-05	10.1355	4.37849	down		RING/U-box superfamily protein
FvH4_7g01310	2.51615	1.53559e-06	6.40565e-05	4.53578	0.947474	down		HXXXD-type acyl-transferase family protein
FvH4_5g36970	1.47517	1.54882e-06	6.4478e-05	40.9494	19.2319	down	ATUGT85A1,UGT85A1	UDP-Glycosyltransferase superfamily protein
FvH4_7g11980	1.61313	1.56089e-06	6.48492e-05	10.6071	4.46882	down	LBD31	LOB domain-containing protein 31
FvH4_1g09220	1.39283	1.68066e-06	6.94056e-05	79.9674	39.874	down		Plant invertase/pectin methylesterase inhibitor superfamily protein
FvH4_6g24890	2.41899	1.75271e-06	7.18052e-05	3.64933	0.826463	down
FvH4_6g41874	1.64388	1.83531e-06	7.48915e-05	19.4621	8.04413	down		GDSL-like Lipase/Acylhydrolase superfamily protein
FvH4_3g04450	1.74984	1.84863e-06	7.52859e-05	520.279	211.29	down
FvH4_1g21200	1.29832	1.88181e-06	7.63355e-05	43.8745	21.4715	down		Haloacid dehalogenase-like hydrolase (HAD) superfamily protein
FvH4_5g04150	2.70593	1.88599e-06	7.63547e-05	5.61484	1.01987	down
FvH4_3g25370	1.1988	1.89405e-06	7.64489e-05	375.347	204.934	down		Pollen Ole e 1 allergen and extensin family protein
FvH4_6g08940	1.67331	1.90469e-06	7.64489e-05	180.641	75.9398	down		Tetratricopeptide repeat (TPR)-like superfamily protein
FvH4_5g12570	1.73929	2.04795e-06	8.16289e-05	6.89785	5.43102	down	CYP94D2	cytochrome P450, family 94, subfamily D, polypeptide 2
FvH4_4g02520	2.45189	2.08411e-06	8.29097e-05	5.4897	1.14508	down		Plant protein of unknown function (DUF247)
FvH4_4g01980	1.4098	2.10666e-06	8.34042e-05	39.1207	18.8363	down	KCS2	3-ketoacyl-CoA synthase 2
FvH4_2g35430	3.27192	2.14068e-06	8.45075e-05	1.99172	0.269821	down
FvH4_6g08790	1.60695	2.19516e-06	8.64927e-05	17.5733	7.70704	down
FvH4_4g24990	2.34585	2.28885e-06	9.00121e-05	7.25177	1.87733	down	ATKCR2,KCR2	beta-ketoacyl reductase 2
FvH4_5g24950	1.07546	2.32959e-06	9.10929e-05	192.514	116.457	down		Uncharacterised protein family (UPF0497)
FvH4_1g09300	1.51382	2.39966e-06	9.34777e-05	13.9395	6.03364	down		SAUR-like auxin-responsive protein family
FvH4_1g28680	2.0057	2.53795e-06	9.79495e-05	6.74823	2.1696	down		Calcium-dependent lipid-binding (CaLB domain) family protein
FvH4_1g23790	1.40657	2.63161e-06	0.000100986	463.115	232.988	down	ATCAD9,CAD9	cinnamyl alcohol dehydrogenase 9
FvH4_3g23370	1.77231	2.64862e-06	0.00010145	22.7351	8.96851	down
FvH4_5g02630	1.39696	3.11283e-06	0.000117958	386.273	190.597	down	PIP1;4,PIP1E,TMP-C	plasma membrane intrinsic protein 1;4
FvH4_4g26830	1.61978	3.14913e-06	0.000118864	2.49495	1.09275	down		Protein kinase superfamily protein
FvH4_5g35460	1.1651	3.18316e-06	0.000119744	10.7079	5.90125	down		basic helix-loop-helix (bHLH) DNA-binding superfamily protein
FvH4_5g20380	1.70653	3.28124e-06	0.000122939	3.44706	1.32792	down	ATCAT6,CAT6	cationic amino acid transporter 6
FvH4_6g42440	1.78053	3.30752e-06	0.000123699	2.03453	0.726847	down	AtGH9B8,GH9B8	glycosyl hydrolase 9B8
FvH4_6g11850	1.17525	3.65605e-06	0.000135504	16.5401	9.22658	down	ATGPAT6,GPAT6	glycerol-3-phosphate acyltransferase 6
FvH4_3g11290	1.03957	3.70459e-06	0.000137056	61.931	37.8505	down	AGL6	AGAMOUS-like 6
FvH4_6g11950	1.28727	3.9411e-06	0.000144252	14.5068	7.47594	down		Duplicated homeodomain-like superfamily protein
FvH4_2g16861	2.11183	3.99493e-06	0.000145964	101.643	29.8245	down		Plant protein 1589 of unknown function
FvH4_4g27420	1.51373	4.01483e-06	0.000146431	96.7459	43.8673	down	CER6,CUT1,G2,KCS6,POP1	3-ketoacyl-CoA synthase 6
FvH4_6g11790	1.30337	4.0352e-06	0.000146914	4.70267	2.37466	down		Plant protein of unknown function (DUF247)
FvH4_6g45800	1.7414	4.10196e-06	0.000149081	185.736	73.5092	down		Late embryogenesis abundant protein (LEA) family protein
FvH4_6g22050	1.33619	4.6213e-06	0.00016717	51.5583	27.1625	down	HAT14	homeobox from Arabidopsis thaliana
FvH4_4g18990	2.58451	4.69603e-06	0.000169476	74.9875	17.9883	down	MLP423	MLP-like protein 423
FvH4_5g31950	1.0705	4.83794e-06	0.000173989	241.467	152.478	down
FvH4_6g49680	1.16494	5.00439e-06	0.000178418	19.7685	11.3865	down	CLE25	CLAVATA3/ESR-RELATED 25
FvH4_3g39340	1.25602	5.13375e-06	0.000182085	10.6557	5.65054	down		RNI-like superfamily protein
FvH4_2g33150	1.03121	5.16474e-06	0.000182869	15.3858	9.50307	down		ARM repeat superfamily protein
FvH4_6g18130	1.06769	5.35976e-06	0.000189124	124.163	75.8989	down	AtGRF4,GRF4	growth-regulating factor 4
FvH4_6g34670	1.28316	5.51347e-06	0.000193884	12.9295	6.57206	down	ATGL1,ATMYB0,GL1,MYB0	myb domain protein 0
FvH4_6g36940	1.4739	5.55233e-06	0.000194918	10.149	4.65085	down
FvH4_7g11310	1.77613	5.57061e-06	0.000195227	3.63212	1.30717	down	PDLP8	plasmodesmata-located protein 8
FvH4_2g01681	1.69718	5.7272e-06	0.000199696	18.3654	7.21949	down		Disease resistance-responsive (dirigent-like protein) family protein
FvH4_6g07820	1.43669	6.71406e-06	0.00023098	483.052	237.649	down	SVB	Protein of unknown function, DUF538
FvH4_4g34740	1.5401	6.95673e-06	0.000238929	3.52887	1.47994	down
FvH4_3g17450	2.50704	7.5467e-06	0.000257913	3.30119	0.818203	down	CYP71A25	cytochrome P450, family 71, subfamily A, polypeptide 25
FvH4_6g06410	1.1243	7.56845e-06	0.000258217	30.7254	17.9364	down		Trypsin family protein with PDZ domain
FvH4_1g17280	1.21712	8.00715e-06	0.000270941	17.0398	8.96481	down		Phototropic-responsive NPH3 family protein
FvH4_6g08930	2.58508	8.0678e-06	0.0002721	15.052	4.49061	down	ATPPCK1,PPCK1	phosphoenolpyruvate carboxylase kinase 1
FvH4_2g26410	1.13383	8.22387e-06	0.000276459	15.0728	8.88323	down	LAX3	like AUX1 3
FvH4_5g17900	1.69393	9.62297e-06	0.000318811	21.0232	9.03011	down		NAD(P)-linked oxidoreductase superfamily protein
FvH4_3g32350	1.617	9.76251e-06	0.000322915	2.70392	1.19984	down		F-box family protein
FvH4_3g16210	1.8918	9.88431e-06	0.00032642	8.61144	2.68674	down	ATGSTU19,GST8,GSTU19	glutathione S-transferase TAU 19
FvH4_1g03760	1.06274	1.00475e-05	0.000330748	106.862	63.6508	down		early nodulin-related
FvH4_5g00760	1.30436	1.04279e-05	0.000341633	54.5967	28.807	down
FvH4_2g03930	2.15778	1.06371e-05	0.000347933	8.92425	2.30509	down		Uncharacterised protein family SERF
FvH4_3g11900	1.23818	1.0991e-05	0.000357808	46.9261	23.9634	down		Homeodomain-like superfamily protein
FvH4_4g19060	2.765	1.10392e-05	0.000358709	16.0141	2.86129	down	MLP423	MLP-like protein 423
FvH4_4g23860	1.0739	1.24708e-05	0.000397812	9.98995	5.88291	down		ELMO/CED-12 family protein
FvH4_7g24370	1.18085	1.27585e-05	0.000405732	35.4157	20.5044	down	CBB3,CPD,CYP90,CYP90A,CYP90A1,DWF3	Cytochrome P450 superfamily protein
FvH4_6g35730	2.31841	1.28699e-05	0.000408644	8.59912	2.23108	down	SEC15B	exocyst complex component sec15B
FvH4_6g01050	1.23992	1.33151e-05	0.000421482	90.7737	50.0128	down
FvH4_2g40900	2.62879	1.39495e-05	0.000440209	1.25863	0.257531	down		HXXXD-type acyl-transferase family protein
FvH4_2g18090	2.60896	1.39825e-05	0.000440576	22.9362	5.49757	down		Protein of unknown function (DUF506)
FvH4_2g21450	1.43996	1.44889e-05	0.000454549	162.411	80.2522	down
FvH4_6g41830	2.05617	1.44921e-05	0.000454549	14.1508	4.61327	down
FvH4_6g12570	2.72792	1.53998e-05	0.000482285	67.549	13.3679	down
FvH4_6g31961	2.01226	1.56923e-05	0.000489957	2.39185	1.7093	down		Transducin/WD40 repeat-like superfamily protein
FvH4_4g03560	1.78308	1.61011e-05	0.00049894	3.05557	1.16282	down	ATPPCK1,PPCK1	phosphoenolpyruvate carboxylase kinase 1
FvH4_7g25530	2.10026	1.64579e-05	0.000509232	51.304	14.4817	down		Hypoxia-responsive family protein
FvH4_3g09870	1.39228	1.65281e-05	0.000510638	59.8793	28.9576	down	FT	PEBP (phosphatidylethanolamine-binding protein) family protein
FvH4_1g24950	1.90225	1.70415e-05	0.00052414	15.9603	6.11412	down
FvH4_6g10380	1.01828	1.74307e-05	0.000535311	18.3596	11.1963	down		Protein of unknown function (DUF567)
FvH4_1g12770	1.68161	1.75954e-05	0.000538532	5.96695	2.22328	down		S-adenosyl-L-methionine-dependent methyltransferases superfamily protein
FvH4_2g32830	1.76173	1.76139e-05	0.000538532	9.98153	3.88065	down		Uncharacterised conserved protein UCP031279
FvH4_7g05620	1.96956	1.78713e-05	0.000544784	9.4504	3.04992	down
FvH4_1g05320	2.33468	1.83504e-05	0.000556918	82.1615	23.4857	down		alpha/beta-Hydrolases superfamily protein
FvH4_1g16840	2.23673	1.88106e-05	0.00056754	6.23541	1.74005	down	UGT84B2	UDP-glucosyl transferase 84B2
FvH4_2g36250	1.24068	1.92367e-05	0.000579547	150.107	88.3452	down	ATRD22,RD22	BURP domain-containing protein
FvH4_6g19871	1.45393	1.95582e-05	0.000588373	22.383	10.9141	down	ATOFP6,OFP6	ovate family protein 6
FvH4_2g23310	1.48886	1.96871e-05	0.000591388	27.0295	12.9085	down	ATOFP16,OFP16	ovate family protein 16
FvH4_6g30320	1.4056	2.1839e-05	0.000649404	92.778	45.0245	down		Ran BP2/NZF zinc finger-like superfamily protein
FvH4_6g53190	1.62056	2.32129e-05	0.000683355	46.7322	20.4561	down
FvH4_3g44752	1.37138	2.33519e-05	0.000686139	61.8021	29.4324	down		Disease resistance-responsive (dirigent-like protein) family protein
FvH4_5g17270	1.7042	2.33741e-05	0.000686139	5.97867	2.15889	down	WOX1	WUSCHEL related homeobox 1
FvH4_6g15770	1.43237	2.48792e-05	0.000725619	3.87255	1.84903	down	ATCRR1,CCR1	CRINKLY4 related 1
FvH4_6g29870	1.50546	2.55058e-05	0.000742371	13.3653	6.025	down
FvH4_3g26130	1.00534	2.73097e-05	0.000790409	30.456	19.6517	down	YAB2	Plant-specific transcription factor YABBY family protein
FvH4_7g01410	1.16934	2.7357e-05	0.000790668	55.7868	31.8633	down		HXXXD-type acyl-transferase family protein
FvH4_3g06200	1.62668	2.76422e-05	0.000796674	9.58657	4.12881	down	ATWRKY28,WRKY28	WRKY DNA-binding protein 28
FvH4_2g40160	1.10577	2.79208e-05	0.000803581	31.5891	19.2092	down		DNA glycosylase superfamily protein
FvH4_4g18200	2.44785	2.8493e-05	0.000816627	4.879	1.26336	down		Concanavalin A-like lectin protein kinase family protein
FvH4_3g02090	1.62089	2.85419e-05	0.000816893	1841.02	828.542	down	PRXR1	Peroxidase superfamily protein
FvH4_4g36040	1.34507	2.89171e-05	0.000826483	8.18543	3.82293	down	AtIDD4,IDD4	indeterminate(ID)-domain 4
FvH4_6g13610	1.2976	2.94136e-05	0.000836037	278.285	146.477	down	ATEXP4,ATEXPA4,ATHEXP,ALPHA,1.6,EXPA4	expansin A4
FvH4_2g01740	1.21561	2.95347e-05	0.000838322	18.0743	10.0845	down		Pollen Ole e 1 allergen and extensin family protein
FvH4_2g10100	1.7188	2.96283e-05	0.000839823	7.91625	3.21039	down	MCT2	MEI2 C-terminal RRM only like 2
FvH4_2g33280	1.05302	3.00973e-05	0.000850774	142.079	88.0008	down		Glycosyl hydrolase family 35 protein
FvH4_4g28720	2.57454	3.00964e-05	0.000850774	6.93466	1.58589	down
FvH4_2g23800	1.69762	3.15372e-05	0.00088904	4.30283	1.71956	down		Phenazine biosynthesis PhzC/PhzF protein
FvH4_6g51230	1.11779	3.21688e-05	0.000905604	70.0424	42.4192	down
FvH4_1g18220	1.16877	3.22907e-05	0.000907797	150.9	88.1802	down	AtGRF1,GRF1	growth-regulating factor 1
FvH4_3g34320	1.40658	3.23881e-05	0.000909293	27.2825	13.1843	down
FvH4_5g11680	1.78139	3.35457e-05	0.000939234	2.9453	1.03323	down	ATCSLG3,CSLG3	cellulose synthase like G3
FvH4_6g16670	1.22983	3.37395e-05	0.000942689	41.3286	23.1557	down		Pectin lyase-like superfamily protein
FvH4_6g44480	1.25064	3.5282e-05	0.000978542	30.6755	16.9084	down		PapD-like superfamily protein
FvH4_2g31700	1.70411	3.57304e-05	0.000989646	48.7889	19.8486	down		Thioredoxin superfamily protein
FvH4_2g05431	1.09175	3.80446e-05	0.00104951	36.0667	22.2158	down
FvH4_1g01600	1.81978	3.84314e-05	0.00105876	4.74857	1.76323	down		NAD(P)-binding Rossmann-fold superfamily protein
FvH4_7g02731	1.77295	3.9405e-05	0.00107981	4.97883	1.76574	down	ACD1-LIKE,PTC52,TIC55-IV	ACD1-like
FvH4_6g14451	1.45721	3.99133e-05	0.00109229	13.3635	6.4085	down
FvH4_1g20160	1.00808	4.0288e-05	0.00110108	9.32293	5.88582	down		basic helix-loop-helix (bHLH) DNA-binding superfamily protein
FvH4_2g21300	1.12312	4.19341e-05	0.00114314	40.6536	24.1622	down		Sugar isomerase (SIS) family protein
FvH4_5g38040	3.95447	4.19378e-05	0.00114314	39.3852	3.19706	down		2-oxoglutarate (2OG) and Fe(II)-dependent oxygenase superfamily protein
FvH4_4g33740	1.25083	4.27366e-05	0.00116184	10.3329	5.94939	down		2-oxoglutarate (2OG) and Fe(II)-dependent oxygenase superfamily protein
FvH4_3g23570	1.46248	4.40517e-05	0.00119287	7.9464	3.53394	down	IAMT1	IAA carboxylmethyltransferase 1
FvH4_2g05080	2.11714	4.52209e-05	0.00121813	13.142	3.81522	down		NADH dehydrogenase subunit 7
FvH4_2g16680	1.04383	4.6171e-05	0.00123994	14.1855	8.74789	down		Protein kinase superfamily protein
FvH4_4g32251	1.58147	5.17564e-05	0.00136912	5.25228	2.16504	down		Heavy metal transport/detoxification superfamily protein
FvH4_7g16111	2.20396	5.36806e-05	0.00141457	1.88767	0.487766	down		NAD(P)-binding Rossmann-fold superfamily protein
FvH4_3g34690	1.48783	5.39982e-05	0.00142112	6.974	3.08392	down	KCS12	3-ketoacyl-CoA synthase 12
FvH4_7g25860	2.20868	5.66441e-05	0.00148507	6.23262	1.56683	down	ATEXP8,ATEXPA8,ATHEXP,ALPHA,1.11,EXP8,EXPA8	expansin A8
FvH4_6g30250	1.51049	5.71461e-05	0.00149633	17.6488	8.77938	down		Galactose oxidase/kelch repeat superfamily protein
FvH4_6g24620	6.27626	5.72783e-05	0.00149789	0.319043	0	down	ATCKX1,CKX1	cytokinin oxidase/dehydrogenase 1
FvH4_3g18380	2.3279	5.73991e-05	0.00149914	21.7573	6.21019	down		D-mannose binding lectin protein with Apple-like carbohydrate-binding domain
FvH4_2g25880	1.50415	5.94832e-05	0.00154965	27.9998	12.9327	down		Protein of unknown function, DUF538
FvH4_4g26071	1.13607	6.1841e-05	0.00160296	3.44742	2.20007	down	CRK2	cysteine-rich RLK (RECEPTOR-like protein kinase) 2
FvH4_6g40610	1.03915	6.52408e-05	0.00168052	14.9221	9.16661	down
FvH4_7g32220	1.98728	6.75954e-05	0.00173467	19.671	6.79015	down		Yippee family putative zinc-binding protein
FvH4_6g00460	1.02211	6.90463e-05	0.00176312	97.2399	61.4916	down
FvH4_3g06840	1.54328	7.07031e-05	0.00179991	3.50586	1.42452	down		Leucine-rich repeat transmembrane protein kinase
FvH4_3g44550	1.01203	7.0749e-05	0.00179991	43.5186	28.0622	down		Cation efflux family protein
FvH4_1g27031	2.79698	7.12328e-05	0.00180998	7.44833	1.22905	down
FvH4_7g30072	1.58834	7.162e-05	0.00181758	3.37701	1.58263	down		MATE efflux family protein
FvH4_4g16670	1.83316	7.3433e-05	0.00185673	1.35851	0.449375	down	PPDK	pyruvate orthophosphate dikinase
FvH4_6g19870	1.24281	7.35583e-05	0.00185762	25.2686	13.9364	down	ATOFP13,OFP13	ovate family protein 13
FvH4_2g23300	2.56363	7.37211e-05	0.00185945	20.3517	5.08631	down		Seed maturation protein
FvH4_4g06410	1.425	7.405e-05	0.0018634	4.20607	1.91131	down
FvH4_2g19210	1.21258	7.66467e-05	0.00192148	44.0281	25.225	down	CLE44	CLAVATA3/ESR-RELATED 44
FvH4_5g14970	1.45492	7.68418e-05	0.00192403	12.0089	5.83463	down	ATMYB94,ATMYBCP70,MYB94	myb domain protein 94
FvH4_5g12761	1.68142	7.89673e-05	0.00197246	7.45115	3.31526	down
FvH4_6g48590	1.47269	8.0254e-05	0.00199493	2651.3	1290.85	down	GASA4	GAST1 protein homolog 4
FvH4_6g20170	1.69434	8.18839e-05	0.00203054	14.5766	5.85652	down	NHL1	NDR1/HIN1-like 1
FvH4_2g21970	2.26847	8.44657e-05	0.00208204	3.1085	0.823145	down	ASL18,LBD16	lateral organ boundaries-domain 16
FvH4_7g33100	1.60776	8.46984e-05	0.00208528	8.44491	3.78963	down		nodulin MtN21 /EamA-like transporter family protein
FvH4_7g29240	2.8789	8.58998e-05	0.00210982	4.40871	0.916678	down		Sugar isomerase (SIS) family protein
FvH4_2g28400	1.31577	8.64627e-05	0.00212111	107.793	56.1654	down		ATP synthase subunit 1
FvH4_7g25520	1.24676	9.5577e-05	0.00232533	34.2739	17.2888	down
FvH4_4g33340	1.41602	9.73549e-05	0.00236164	17.7412	8.52371	down	ATVIT1,VIT1	vacuolar iron transporter 1
FvH4_1g03080	1.27471	9.89477e-05	0.00239321	16.56	8.3918	down		Tetratricopeptide repeat (TPR)-like superfamily protein
FvH4_6g48970	1.9361	9.93773e-05	0.00239966	6.95091	2.27697	down		basic helix-loop-helix (bHLH) DNA-binding family protein
FvH4_5g37780	2.40915	9.96984e-05	0.00240291	3.626	0.800561	down		Haloacid dehalogenase-like hydrolase (HAD) superfamily protein
FvH4_7g34110	1.38602	0.000110528	0.00263312	5.58994	2.5593	down
FvH4_4g18340	1.44424	0.000115574	0.00273751	85.4177	38.6346	down
FvH4_6g20350	1.03114	0.000119086	0.00280779	12.154	7.09681	down	BLH1,EDA29	BEL1-like homeodomain 1
FvH4_6g08700	2.08844	0.000128288	0.00300698	9.42755	2.7067	down
FvH4_6g07950	1.10427	0.000128602	0.00300805	67.1047	38.0003	down
FvH4_4g10250	2.20056	0.000134091	0.00311161	2.01539	0.625553	down
FvH4_6g14000	1.31639	0.000137233	0.00317748	13.3802	6.61977	down	ATDOF2.4,DOF2.4	DNA binding with one finger 2.4
FvH4_5g01430	1.56464	0.000142295	0.00327629	4.47194	1.77173	down
FvH4_1g03200	1.53979	0.000147094	0.0033717	12.3289	5.70126	down	ATSPX1,SPX1	SPX domain gene 1
FvH4_1g14970	1.09043	0.000148551	0.00340132	48.2117	29.1869	down		Dof-type zinc finger DNA-binding family protein
FvH4_6g31720	1.58086	0.000150923	0.00344035	10.4496	4.92544	down		D-isomer specific 2-hydroxyacid dehydrogenase family protein
FvH4_3g16250	1.10941	0.000153238	0.00348157	334.929	203.395	down	ATGSTU19,GST8,GSTU19	glutathione S-transferase TAU 19
FvH4_4g18300	1.56287	0.000153883	0.00349236	7103.48	3339.29	down	TCTP	translationally controlled tumor protein
FvH4_7g12500	1.3114	0.000159446	0.0035988	27.9168	14.808	down		alpha/beta-Hydrolases superfamily protein
FvH4_6g53990	1.78059	0.000161976	0.0036479	10.5104	4.20603	down	SRG3	senescence-related gene 3
FvH4_1g08030	1.4706	0.000166399	0.00372716	6.89704	3.27261	down	ATCFIM-25,CFIM-25	homolog of CFIM-25
FvH4_4g16260	2.36276	0.000168309	0.0037637	3.26835	0.735191	down		Protein of unknown function (DUF1677)
FvH4_5g26660	1.26588	0.000168396	0.0037637	612.837	343.108	down	SVB	Protein of unknown function, DUF538
FvH4_c1g00520	2.10211	0.00017164	0.00382791	34.8506	10.3934	down		NADH dehydrogenase 2A
FvH4_2g26340	1.20018	0.000172529	0.00384358	11.2322	5.93061	down		C2H2-like zinc finger protein
FvH4_6g46330	1.25239	0.000173556	0.00386227	11.7633	6.80741	down		Pollen Ole e 1 allergen and extensin family protein
FvH4_7g23871	1.98529	0.000174067	0.00386779	7.48407	2.17629	down
FvH4_2g14900	1.09441	0.00017717	0.00392575	25.649	14.9792	down	ATHM2	Thioredoxin superfamily protein
FvH4_c3g00070	2.06246	0.000177944	0.00393866	1645.91	456.762	down
FvH4_6g46750	1.01407	0.000178153	0.00393904	6.14437	3.8658	down		HXXXD-type acyl-transferase family protein
FvH4_6g22100	1.22926	0.000181663	0.00400551	13.6944	7.77903	down
FvH4_2g29320	2.3097	0.000187327	0.00411102	2.44844	0.537366	down
FvH4_2g31820	2.45561	0.00019347	0.00424132	5.02171	0.899999	down
FvH4_4g10860	1.06859	0.00019395	0.00424733	476.842	298.886	down		pfkB-like carbohydrate kinase family protein
FvH4_2g07050	1.78415	0.000198089	0.00431046	6.79651	2.6371	down	MLP43	MLP-like protein 43
FvH4_2g34180	1.46868	0.000198458	0.00431396	5.86023	2.80171	down		Ribosomal protein S5 family protein
FvH4_4g07560	1.87479	0.000199371	0.00432467	4.32154	1.61481	down
FvH4_6g06041	2.01167	0.000204972	0.00442753	6.7253	2.07994	down
FvH4_7g23661	1.17209	0.000206348	0.00445258	5.16846	2.87964	down		UDP-Glycosyltransferase superfamily protein
FvH4_2g07080	2.16843	0.000207416	0.00446748	10.2221	4.12884	down		2-oxoglutarate (2OG) and Fe(II)-dependent oxygenase superfamily protein
FvH4_2g08400	1.08227	0.000212922	0.00455627	24.372	15.2326	down	ATPLT5,ATPMT5,PMT5	polyol/monosaccharide transporter 5
FvH4_3g05530	1.953	0.000218214	0.00466466	126.227	46.5959	down	ATGA2OX2,GA2OX2	gibberellin 2-oxidase
FvH4_4g22080	1.01778	0.000221673	0.00472391	123.805	78.6711	down		Translation protein SH3-like family protein
FvH4_3g08750	1.14004	0.000223056	0.00474846	205.104	122.572	down	ATERF-4,ATERF4,ERF4,RAP2.5	ethylene responsive element binding factor 4
FvH4_6g09960	1.26408	0.000225864	0.00478846	2837.62	1583.45	down	LTP4	lipid transfer protein 4
FvH4_4g19120	2.73366	0.000227566	0.00481464	4.47071	1.01146	down	MLP423	MLP-like protein 423
FvH4_7g10740	1.98964	0.000228267	0.0048245	122.787	44.8193	down	GATA4	GATA transcription factor 4
FvH4_6g44380	1.34482	0.000230054	0.00485589	2.25655	1.09887	down	ATENT3,ENT3,FUR1	Major facilitator superfamily protein
FvH4_2g00100	2.11114	0.000234732	0.00494161	26.4318	9.08666	down		RmlC-like cupins superfamily protein
FvH4_6g08191	1.10611	0.000234767	0.00494161	6.74782	4.19934	down		Eukaryotic aspartyl protease family protein
FvH4_5g10860	1.55195	0.000239885	0.0050442	10.9081	4.57252	down		glyoxal oxidase-related protein
FvH4_3g33880	1.67186	0.000247082	0.00515346	3.91492	1.52975	down	NAXT1	nitrate excretion transporter1
FvH4_4g18591	1.54321	0.000247674	0.00516059	19.5489	9.21554	down		alpha/beta-Hydrolases superfamily protein
FvH4_1g18280	1.03352	0.000248077	0.00516377	30.825	19.0766	down	AtRLP44,RLP44	receptor like protein 44
FvH4_2g16500	1.43813	0.000248338	0.00516399	7.5556	3.50353	down	CYP87A2	cytochrome P450, family 87, subfamily A, polypeptide 2
FvH4_4g27430	1.35234	0.000251349	0.00521606	3.48461	1.74223	down		NAD(P)-binding Rossmann-fold superfamily protein
FvH4_6g12850	1.50286	0.000253552	0.00525272	8.61662	3.9037	down		Protein of unknown function, DUF617
FvH4_5g38050	2.30394	0.000258141	0.0053195	28.923	6.9041	down		2-oxoglutarate (2OG) and Fe(II)-dependent oxygenase superfamily protein
FvH4_4g21970	2.54031	0.000259035	0.0053326	4.68121	1.23376	down		PLC-like phosphodiesterases superfamily protein
FvH4_5g00370	2.1539	0.000259878	0.00534463	7.93543	2.53824	down	BETA-VPE,BETAVPE	beta vacuolar processing enzyme
FvH4_2g07082	1.02109	0.000260302	0.00534799	4.24959	2.5476	down		2-oxoglutarate (2OG) and Fe(II)-dependent oxygenase superfamily protein
FvH4_7g30000	1.10825	0.000260702	0.00535032	402.575	245.5	down	DCR,EMB3009,PEL3	HXXXD-type acyl-transferase family protein
FvH4_2g31280	1.85645	0.000262164	0.00536486	1.94488	0.63686	down	AL3	alfin-like 3
FvH4_7g10680	1.08483	0.000262828	0.0053731	52.5955	32.8624	down	SPL11	squamosa promoter-like 11
FvH4_6g22530	1.47528	0.000270364	0.00548906	12.7937	5.86521	down
FvH4_6g31850	1.50577	0.000274665	0.0055654	2.90453	1.22174	down		Sulfite exporter TauE/SafE family protein
FvH4_6g17930	1.15833	0.000275658	0.00557745	13.3514	7.96544	down		D-mannose binding lectin protein with Apple-like carbohydrate-binding domain
FvH4_7g00120	1.90847	0.000287128	0.00578383	3.99758	1.37661	down		Cysteine/Histidine-rich C1 domain family protein
FvH4_6g08070	1.12525	0.000309813	0.00615652	6.05258	3.66842	down		GDSL-like Lipase/Acylhydrolase superfamily protein
FvH4_7g25180	1.81494	0.000315423	0.00625594	4.7186	1.47093	down	PYL6,RCAR9	PYR1-like 6
FvH4_2g22890	1.34157	0.00032132	0.00634846	12.0218	7.84305	down
FvH4_1g28730	1.08341	0.000326155	0.00643164	15.9165	9.84159	down		Protein of unknown function DUF2359, transmembrane
FvH4_2g17930	1.54113	0.000326487	0.00643205	165.77	77.6528	down
FvH4_7g14900	1.277	0.000334823	0.00657114	35.3496	18.1114	down	BRH1	brassinosteroid-responsive RING-H2
FvH4_3g41390	1.20387	0.000337412	0.00661565	46.5188	27.0343	down		Ribonuclease E inhibitor RraA/Dimethylmenaquinone methyltransferase
FvH4_1g14400	1.07921	0.00034673	0.00675977	89.5888	55.2567	down
FvH4_2g23871	1.53077	0.000363598	0.00705524	6.88254	3.02122	down	DVL8,RTFL7	ROTUNDIFOLIA like 7
FvH4_6g35410	1.23871	0.000380796	0.00734744	12.4305	6.49785	down		SAUR-like auxin-responsive protein family
FvH4_3g04190	1.913	0.000384342	0.00740892	15.9482	7.94219	down		Ribosomal protein L11 family protein
FvH4_3g41720	1.05607	0.000387523	0.00745629	7.76442	4.68301	down		Calcium-binding EF-hand family protein
FvH4_4g36420	1.10353	0.000401347	0.00765083	1.87381	1.10307	down	ATPSKR1,PSKR1	phytosulfokin receptor 1
FvH4_6g30160	1.16789	0.000405696	0.00771234	134.754	78.4926	down		Lactoylglutathione lyase / glyoxalase I family protein
FvH4_1g30100	1.38273	0.000418599	0.00792837	22.5239	11.3721	down		carbon-sulfur lyases
FvH4_5g07710	2.02742	0.000425288	0.00803685	3.96861	1.4175	down	MLS	malate synthase
FvH4_7g14440	1.27057	0.000427811	0.00806579	81.8544	45.3644	down	AtGPAT8,GPAT8	glycerol-3-phosphate acyltransferase 8
FvH4_3g32680	1.46179	0.000434097	0.00815854	7.41785	3.33576	down	ATFLA11,FLA11	FASCICLIN-like arabinogalactan-protein 11
FvH4_6g33070	1.87446	0.000434565	0.00815854	5.20208	1.6465	down	ATMRP6,MRP6	multidrug resistance-associated protein 6
FvH4_6g33130	1.24147	0.000434711	0.00815854	40.0526	22.1681	down	PRA1.F2,PRA7	PRA1 (Prenylated rab acceptor) family protein
FvH4_3g35960	1.21828	0.000438165	0.00818699	26.0278	14.8917	down	ACT11	actin-11
FvH4_4g27020	1.1292	0.000445685	0.00831152	21.9463	13.0548	down		C2H2 and C2HC zinc fingers superfamily protein
FvH4_2g03430	1.10571	0.000452109	0.00842371	3.85706	2.23819	down		Protein kinase superfamily protein
FvH4_3g07370	1.18598	0.000464098	0.00860041	25.8146	13.5187	down
FvH4_6g10270	1.28776	0.000465231	0.00861368	119.186	68.046	down
FvH4_5g06392	1.57681	0.000470519	0.00869594	4.15399	1.76645	down	ATNRT3.1,NRT3.1,WR3	nitrate transmembrane transporters
FvH4_2g35860	1.14659	0.000474612	0.00874805	76.1139	44.8618	down		ARM repeat superfamily protein
FvH4_1g20190	1.2616	0.000480804	0.00883059	4.35992	2.24585	down
FvH4_3g40801	1.08416	0.000482732	0.00885812	49.7357	31.2044	down
FvH4_5g01170	2.30816	0.000490483	0.00897636	4.55824	1.29977	down	ANS,LDOX,TDS4,TT18	leucoanthocyanidin dioxygenase
FvH4_c1g00130	1.7996	0.000497196	0.009067	25.2519	9.34211	down		NADH dehydrogenase subunit 7
FvH4_3g44790	1.11246	0.000497681	0.00906782	31.0849	16.6223	down		Disease resistance-responsive (dirigent-like protein) family protein
FvH4_1g10572	3.12958	0.00051547	0.0093671	2.06848	0.339289	down	SSL5,YLS2	Calcium-dependent phosphotriesterase superfamily protein
FvH4_2g41370	1.29716	0.000523548	0.00947455	3.68803	2.02732	down		Eukaryotic aspartyl protease family protein
FvH4_6g10320	2.02007	0.000525295	0.00948708	7.95056	2.71869	down		Nuclear transport factor 2 (NTF2) family protein
FvH4_3g15360	1.11512	0.000530669	0.00956736	13.0423	7.91276	down
FvH4_6g02090	1.24082	0.000540485	0.00971883	65.1221	36.6118	down	ATPPCK1,PPCK1	phosphoenolpyruvate carboxylase kinase 1
FvH4_c1g00470	1.63574	0.000541943	0.00973654	43.9704	17.8138	down		NADH dehydrogenase 5A
FvH4_4g30030	1.42923	0.000548677	0.00979881	2.82131	1.28042	down		Putative membrane lipoprotein
FvH4_6g09321	1.98046	0.000547673	0.00979881	2.0028	0.595916	down	CYP714A1	cytochrome P450, family 714, subfamily A, polypeptide 1
FvH4_1g04750	1.04282	0.000570351	0.0101321	9.89478	6.33407	down	ATPLT5,ATPMT5,PMT5	polyol/monosaccharide transporter 5
FvH4_5g19570	1.09559	0.000575088	0.010196	78.3193	49.1106	down	ATHB-2,ATHB2,HAT4,HB-2	homeobox protein 2
FvH4_5g31910	1.12515	0.000575433	0.010196	11.5068	6.89519	down		basic helix-loop-helix (bHLH) DNA-binding superfamily protein
FvH4_7g29520	1.04803	0.000585888	0.0103457	45.1949	28.4929	down		Heavy metal transport/detoxification superfamily protein
FvH4_2g28480	1.96129	0.000587879	0.0103719	40.3803	13.8033	down		Intron maturase, type II family protein
FvH4_3g30690	3.15533	0.000594312	0.0104586	2.06673	0.279118	down		Thioredoxin superfamily protein
FvH4_6g53292	1.60556	0.000596122	0.0104815	6.92005	3.09195	down		Galactose oxidase/kelch repeat superfamily protein
FvH4_4g35560	1.08482	0.000611671	0.0107044	19.7497	11.6193	down	ATGSTU18,GST29,GSTU18	glutathione S-transferase TAU 18
FvH4_6g02830	1.09924	0.000611805	0.0107044	14.4421	8.5863	down	ATUBC2,UBC2	ubiquiting-conjugating enzyme 2
FvH4_5g36230	1.96096	0.000614635	0.0107428	1.93819	0.643144	down		RING/U-box superfamily protein
FvH4_2g38560	1.20233	0.000625094	0.0109071	16.8644	9.81782	down		C2H2-like zinc finger protein
FvH4_2g39380	1.0282	0.000670258	0.0115623	7.85281	4.96086	down		HXXXD-type acyl-transferase family protein
FvH4_3g15390	1.3039	0.000671014	0.0115623	38.895	21.1047	down		SAUR-like auxin-responsive protein family
FvH4_7g20800	1.18984	0.00067106	0.0115623	2.73602	1.47447	down		ABC-2 type transporter family protein
FvH4_6g22810	1.60067	0.000700679	0.0119825	2.99534	1.88826	down	ATPGIP1,PGIP1	polygalacturonase inhibiting protein 1
FvH4_4g21760	1.38985	0.000706315	0.0120489	11.7189	6.07909	down
FvH4_6g07830	1.00836	0.000707153	0.0120532	57.7531	34.7897	down	SVB	Protein of unknown function, DUF538
FvH4_6g16480	1.11859	0.000708626	0.0120683	5.95302	3.58617	down	ATMYB68,MYB68	myb domain protein 68
FvH4_6g53900	1.0419	0.000726007	0.0123439	34.9833	22.7565	down	ROXY1	Thioredoxin superfamily protein
FvH4_1g08570	2.21923	0.000739887	0.0125282	2.43682	0.624378	down	ATGER3,GER3,GLP3,GLP3A,GLP3B	germin 3
FvH4_7g27250	1.273	0.000743922	0.0125759	48.5553	27.4716	down		Uncharacterised conserved protein (UCP012943)
FvH4_3g23040	2.79944	0.000753989	0.0127248	1.96903	0.382836	down
FvH4_5g13131	1.97793	0.000756774	0.0127513	9.34213	2.99535	down
FvH4_6g09970	1.10979	0.000765743	0.0128457	113.086	64.5523	down	LTP4	lipid transfer protein 4
FvH4_6g48670	1.13505	0.000772903	0.0129279	5.17568	2.84199	down		alpha/beta-Hydrolases superfamily protein
FvH4_6g32640	1.32334	0.000778023	0.0129925	57.8394	27.8442	down		GDSL-like Lipase/Acylhydrolase superfamily protein
FvH4_7g27470	1.50564	0.000783384	0.0130608	5.03205	2.26436	down	PEX11B	peroxin 11B
FvH4_3g19800	1.01609	0.000785208	0.0130807	9.7689	5.9259	down		VQ motif-containing protein
FvH4_3g08880	1.50211	0.000790843	0.0131563	34.5216	14.3911	down	SPL3	squamosa promoter binding protein-like 3
FvH4_6g20110	1.05138	0.000811847	0.01344	37.4335	23.159	down
FvH4_3g13060	1.22015	0.000846728	0.0139254	5.55603	5.52961	down	CAT5	cationic amino acid transporter 5
FvH4_7g26670	2.42138	0.000879812	0.0143777	5.76883	6.56204	down		Ankyrin repeat family protein
FvH4_1g17110	1.02785	0.000883613	0.0144055	44.387	28.1242	down		alpha/beta-Hydrolases superfamily protein
FvH4_6g08740	1.04422	0.000904401	0.0146979	68.4099	43.6983	down	GLP5	germin-like protein 5
FvH4_4g25700	1.5541	0.000923269	0.0149574	3.66455	1.57393	down		RING/U-box superfamily protein
FvH4_1g13510	1.1194	0.000935877	0.0151013	21.8286	13.1817	down
FvH4_6g13360	1.61514	0.000948645	0.0152605	44.008	19.8107	down
FvH4_5g15000	2.40837	0.000966816	0.0154924	13.7215	4.30839	down	ATGSTU9,GST14,GST14B,GSTU9	glutathione S-transferase tau 9
FvH4_6g53560	1.0189	0.000965589	0.0154924	101.409	64.2521	down	ATTSO2,TSO2	Ferritin/ribonucleotide reductase-like family protein
FvH4_4g27890	2.03946	0.000976487	0.015623	1.67157	0.489871	down		Pyridoxal-dependent decarboxylase family protein
FvH4_2g36990	1.01153	0.000989868	0.0157637	139.896	91.3654	down	FDH,KCS10	3-ketoacyl-CoA synthase 10
FvH4_6g14810	1.25082	0.000998556	0.0158397	5.83541	3.26807	down
FvH4_6g40583	1.63428	0.000999255	0.0158397	14.4771	6.57881	down		Galactose oxidase/kelch repeat superfamily protein
FvH4_3g16010	1.20153	0.00100582	0.0159194	242.703	141.839	down
FvH4_6g50310	1.33233	0.00101484	0.0160129	3.11713	1.47151	down		Disease resistance protein (CC-NBS-LRR class) family
FvH4_7g32590	2.77887	0.00110215	0.0171411	1.76127	0.309146	down
FvH4_6g36931	1.03133	0.00113822	0.0176622	5.58489	3.42682	down		lipid-binding serum glycoprotein family protein
FvH4_1g20110	1.72642	0.00116351	0.0180003	3.77159	1.66194	down	ATL6	RING/U-box superfamily protein
FvH4_1g18690	1.25321	0.0011757	0.0181481	93.4261	53.7524	down	PMDH1	peroxisomal NAD-malate dehydrogenase 1
FvH4_3g41570	1.21621	0.00118395	0.0182361	15.7966	9.4918	down	PRA1.G2	prenylated RAB acceptor 1.G2
FvH4_6g20500	2.0318	0.00118406	0.0182361	1.90509	0.568219	down
FvH4_5g19980	1.55064	0.00120959	0.0185719	9.32814	4.00611	down	PLA-I{beta]2	alpha/beta-Hydrolases superfamily protein
FvH4_5g05190	1.22595	0.001212	0.0185831	8.65436	4.74519	down	PG2	polygalacturonase 2
FvH4_6g45320	2.37505	0.00121536	0.018607	9.33489	2.73274	down		AWPM-19-like family protein
FvH4_3g07380	1.02711	0.00124948	0.0190303	23.4796	14.5387	down
FvH4_6g05350	1.0214	0.00127762	0.019373	7.54317	4.50094	down		D-aminoacid aminotransferase-like PLP-dependent enzymes superfamily protein
FvH4_3g37240	1.54305	0.00130877	0.0196654	6.72404	3.03024	down	COPT1	copper transporter 1
FvH4_6g20103	2.66503	0.00132989	0.0198876	2.60837	0.505964	down
FvH4_5g29991	1.03192	0.00137199	0.020384	2.22318	1.31945	down	CRK8	cysteine-rich RLK (RECEPTOR-like protein kinase) 8
FvH4_1g17420	2.13248	0.00140232	0.0207598	17.8988	6.18228	down		Acyl-CoA N-acyltransferases (NAT) superfamily protein
FvH4_6g33440	1.11382	0.00141573	0.0209283	9.51557	5.50859	down		Late embryogenesis abundant (LEA) hydroxyproline-rich glycoprotein family
FvH4_2g36680	1.2515	0.0014262	0.0209627	25.2918	14.0894	down		Peptidyl-tRNA hydrolase II (PTH2) family protein
FvH4_4g27540	1.23218	0.00145227	0.0213307	52.439	29.8662	down
FvH4_3g03360	1.23829	0.00146536	0.0214922	37.0284	20.8909	down
FvH4_6g12301	1.70916	0.00150823	0.0219182	3.6032	1.53787	down
FvH4_3g29930	1.09089	0.00151033	0.0219334	87.7705	54.9211	down
FvH4_5g10700	1.02819	0.00154102	0.0223005	60.4407	38.8817	down		Glutaredoxin family protein
FvH4_6g43750	1.31798	0.00155809	0.0224686	4.34608	2.11248	down		basic helix-loop-helix (bHLH) DNA-binding superfamily protein
FvH4_2g28300	1.13147	0.00160615	0.0230326	9.81449	5.29805	down	KNAT3	KNOTTED1-like homeobox gene 3
FvH4_5g15490	1.27377	0.00160831	0.0230477	21.0508	11.8342	down	ATHIR1,HIR1	SPFH/Band 7/PHB domain-containing membrane-associated protein family
FvH4_5g12770	2.40063	0.00161334	0.0231036	4.10764	1.17123	down		Oleosin family protein
FvH4_4g00110	1.07446	0.00164026	0.0233432	21.098	13.1191	down		splicing factor, putative
FvH4_6g39311	1.6407	0.00166183	0.0235687	3.64244	2.54281	down		UDP-Glycosyltransferase superfamily protein
FvH4_1g21450	1.13376	0.00167072	0.0236459	316.644	182.031	down	ATIPS2,ATMIPS2,MIPS2	myo-inositol-1-phosphate synthase 2
FvH4_4g02640	1.38678	0.00166962	0.0236459	2.20131	1.16524	down		P-loop containing nucleoside triphosphate hydrolases superfamily protein
FvH4_6g42780	1.05642	0.00170336	0.0240749	7.10108	4.07871	down	ATCSLB03,ATCSLB3,CSLB03	cellulose synthase-like B3
FvH4_6g04960	1.01581	0.00181386	0.0254274	606.897	398.02	down	ATGID1C,GID1C	alpha/beta-Hydrolases superfamily protein
FvH4_6g47010	1.22766	0.00181666	0.0254492	25.0387	14.3923	down
FvH4_6g29260	1.31674	0.00181855	0.0254584	3.38273	1.82551	down		adenylate cyclases
FvH4_2g05600	1.18022	0.0018531	0.0258369	2.42521	1.3693	down	UGT73B3	UDP-glucosyl transferase 73B3
FvH4_3g29510	1.208	0.00186756	0.0260032	32.953	19.7329	down	ATSERAT2;2,SAT-1,SAT-A,SAT-M,SAT3,SERAT2;2	serine acetyltransferase 2;2
FvH4_6g13710	1.44911	0.00192826	0.0266325	6739.64	3473.6	down
FvH4_7g10710	1.61713	0.00193227	0.0266522	25.903	11.5193	down
FvH4_3g08670	1.15865	0.00198503	0.0272704	20.6912	12.5309	down
FvH4_1g02690	1.56605	0.00199615	0.0274049	6.19192	2.46937	down	AtMYB82,MYB82	myb domain protein 82
FvH4_2g21990	1.11326	0.00208134	0.0284041	6.93148	4.07477	down		Nodulin MtN3 family protein
FvH4_3g32220	1.34552	0.00216962	0.0293717	161.271	88.4527	down		Protein of unknown function, DUF584
FvH4_5g05700	1.23079	0.00217077	0.0293717	1.89929	0.935975	down		Tetratricopeptide repeat (TPR)-like superfamily protein
FvH4_6g15530	2.50153	0.00219233	0.0296051	1.74249	0.400166	down
FvH4_5g08330	1.14093	0.00223378	0.0300467	27.0818	16.4354	down		HCP-like superfamily protein with MYND-type zinc finger
FvH4_c1g00620	1.85371	0.00224158	0.0301122	10.496	3.68672	down		Phototropic-responsive NPH3 family protein
FvH4_2g33690	1.17565	0.00230107	0.0307113	173.544	105.477	down	SLY1	F-box family protein
FvH4_1g00330	2.18843	0.00231602	0.0308509	2.45356	0.808462	down		Zinc-binding dehydrogenase family protein
FvH4_7g22910	1.05891	0.00234355	0.0311772	48.2622	30.8707	down	RCA	rubisco activase
FvH4_3g12891	1.00222	0.00238139	0.0315295	19.0468	11.8396	down	ZIP1	zinc transporter 1 precursor
FvH4_6g45620	1.07948	0.00240551	0.0316743	15.2224	9.03305	down	TBL21	TRICHOME BIREFRINGENCE-LIKE 21
FvH4_5g09090	1.49169	0.00248788	0.0325097	3.28064	1.48024	down		Uncharacterised protein family (UPF0497)
FvH4_7g22630	1.67802	0.00250512	0.0326728	2.27977	0.850354	down	CYP71A22	cytochrome P450, family 71, subfamily A, polypeptide 22
FvH4_5g36870	1.25367	0.00259805	0.0335899	3.85569	2.14802	down	ATGSTU8,GSTU8	glutathione S-transferase TAU 8
FvH4_7g33550	1.04932	0.00270077	0.0346327	14.9468	9.2779	down	ENH1	rubredoxin family protein
FvH4_7g26940	1.24639	0.0027569	0.0351773	126.728	73.7641	down		Integrase-type DNA-binding superfamily protein
FvH4_3g20030	1.07065	0.00276123	0.0352108	42.2178	25.9233	down	ATMT3,MT3	metallothionein 3
FvH4_6g09940	1.2158	0.0028168	0.0358086	4.34307	2.37755	down		RING/U-box superfamily protein
FvH4_2g09840	1.49139	0.00284515	0.0360801	2.36952	1.04131	down		MBOAT (membrane bound O-acyl transferase) family protein
FvH4_6g39540	1.05522	0.00295769	0.0371868	45.4672	29.1042	down
FvH4_1g18251	1.63092	0.00301466	0.0377476	3.90702	1.56863	down		Thioredoxin superfamily protein
FvH4_4g29730	1.09407	0.00303286	0.0378615	46.807	29.2712	down	PGL1	6-phosphogluconolactonase 1
FvH4_3g30841	1.28174	0.0030652	0.0381199	277.497	157.793	down
FvH4_5g04650	1.34313	0.0030637	0.0381199	38.3594	22.7593	down
FvH4_5g10090	1.50288	0.00322729	0.0397994	2.33952	0.967625	down		Protein kinase superfamily protein
FvH4_1g08531	1.81563	0.00325924	0.0400814	22.3517	7.86145	down	ATGER3,GER3,GLP3,GLP3A,GLP3B	germin 3
FvH4_3g04690	1.37076	0.0032649	0.0400952	9.59777	5.04094	down
FvH4_3g45301	4.68616	0.00329883	0.0404156	0.53997	0.0246951	down		RNA-binding KH domain-containing protein
FvH4_1g06160	1.0576	0.0033781	0.0411422	42.012	26.5606	down	ATTIM17-2,TIM17,TIM17-2	translocase inner membrane subunit 17-2
FvH4_4g18540	1.03007	0.00338128	0.0411424	13.5779	8.97584	down		Protein of unknown function (DUF581)
FvH4_1g16370	1.40763	0.00340482	0.0413942	11.8699	6.24126	down	DEAR2	DREB and EAR motif protein 2
FvH4_5g11100	1.85778	0.0034125	0.0414631	2.39359	0.744956	down	MEE66	F-box family protein
FvH4_1g18550	1.13553	0.00345144	0.041813	31.5965	18.3698	down	XTH6	xyloglucan endotransglucosylase/hydrolase 6
FvH4_4g20180	1.21353	0.00349872	0.0421627	5.95954	3.50423	down		Plant invertase/pectin methylesterase inhibitor superfamily protein
FvH4_2g00420	1.37206	0.00360286	0.0431402	4.69334	2.34048	down
FvH4_6g01370	1.6112	0.0036201	0.0432962	14.1939	5.27887	down		GDSL-like Lipase/Acylhydrolase superfamily protein
FvH4_7g19610	1.12249	0.00365631	0.0435877	110.722	67.6019	down		alpha/beta-Hydrolases superfamily protein
FvH4_2g38340	1.52903	0.00373599	0.0443222	205.847	103.359	down		Chaperone DnaJ-domain superfamily protein
FvH4_2g39680	1.46336	0.00374804	0.0443884	1.75392	0.866732	down		Thioredoxin superfamily protein
FvH4_4g08920	1.34102	0.003845	0.0453024	2.91401	1.50333	down		transferases, transferring glycosyl groups
FvH4_7g03400	1.57653	0.0038429	0.0453024	2.00418	0.862586	down	ATVDAC1,VDAC1	voltage dependent anion channel 1
FvH4_6g09540	1.25559	0.0038484	0.0453166	1710.03	1006.47	down	UBC28	ubiquitin-conjugating enzyme 28
FvH4_1g05400	1.84194	0.00390716	0.0458774	4.22274	1.33056	down	ATTPS21,TPS21	terpene synthase 21
FvH4_6g38670	1.21405	0.00401632	0.0467974	48.8244	28.8515	down	HPD,PDS1	phytoene desaturation 1
FvH4_5g22471	2.18681	0.00402926	0.0469101	1.59608	0.45812	down
FvH4_5g09180	1.06788	0.00408754	0.0473943	2.30897	1.69533	down	PHT3;2	phosphate transporter 3;2
FvH4_1g19111	2.80969	0.00418721	0.0482583	0.968194	0.185701	down
FvH4_5g12460	3.92649	0.00429828	0.0493178	0.307721	0.0202156	down		PLAC8 family protein
FvH4_3g06620	1.1466	0.00436639	0.0498218	2.79712	1.50266	down		GDSL-like Lipase/Acylhydrolase superfamily protein

## Sheet: GO terms-1
Enriched GO terms in the list of genes up-regulated in the FM compared to SAM
Tags	GO ID	GO Name	GO Category	FDR	P-Value	Nr Test	Nr Reference	Non Annot Test	Non Annot Reference
[OVER]	GO:2000112	regulation of cellular macromolecule biosynthetic process	BIOLOGICAL_PROCESS	8.0372e-14	1.52963e-16	83	967	900	32057
[OVER]	GO:0051252	regulation of RNA metabolic process	BIOLOGICAL_PROCESS	8.0372e-14	9.28317e-17	83	958	900	32066
[OVER]	GO:0009889	regulation of biosynthetic process	BIOLOGICAL_PROCESS	8.0372e-14	1.70762e-16	83	969	900	32055
[OVER]	GO:0031326	regulation of cellular biosynthetic process	BIOLOGICAL_PROCESS	8.0372e-14	1.70762e-16	83	969	900	32055
[OVER]	GO:1903506	regulation of nucleic acid-templated transcription	BIOLOGICAL_PROCESS	8.0372e-14	7.01345e-17	83	953	900	32071
[OVER]	GO:0010556	regulation of macromolecule biosynthetic process	BIOLOGICAL_PROCESS	8.0372e-14	1.52963e-16	83	967	900	32057
[OVER]	GO:0006355	regulation of transcription, DNA-templated	BIOLOGICAL_PROCESS	8.0372e-14	7.01345e-17	83	953	900	32071
[OVER]	GO:0019219	regulation of nucleobase-containing compound metabolic process	BIOLOGICAL_PROCESS	8.0372e-14	1.70762e-16	83	969	900	32055
[OVER]	GO:2001141	regulation of RNA biosynthetic process	BIOLOGICAL_PROCESS	8.0372e-14	7.01345e-17	83	953	900	32071
[OVER]	GO:0010468	regulation of gene expression	BIOLOGICAL_PROCESS	1.49119e-13	3.52027e-16	84	1002	899	32022
[OVER]	GO:0008152	metabolic process	BIOLOGICAL_PROCESS	5.72248e-13	1.75619e-15	344	7798	639	25226
[OVER]	GO:0051171	regulation of nitrogen compound metabolic process	BIOLOGICAL_PROCESS	5.84569e-13	2.07e-15	83	1016	900	32008
[OVER]	GO:0031323	regulation of cellular metabolic process	BIOLOGICAL_PROCESS	5.84569e-13	2.07e-15	83	1016	900	32008
[OVER]	GO:0080090	regulation of primary metabolic process	BIOLOGICAL_PROCESS	6.07124e-13	2.2932e-15	83	1018	900	32006
[OVER]	GO:0006351	transcription, DNA-templated	BIOLOGICAL_PROCESS	1.04194e-12	4.42751e-15	86	1092	897	31932
[OVER]	GO:0097659	nucleic acid-templated transcription	BIOLOGICAL_PROCESS	1.04194e-12	4.42751e-15	86	1092	897	31932
[OVER]	GO:0060255	regulation of macromolecule metabolic process	BIOLOGICAL_PROCESS	1.07522e-12	5.07661e-15	84	1054	899	31970
[OVER]	GO:0032774	RNA biosynthetic process	BIOLOGICAL_PROCESS	1.07522e-12	4.87857e-15	86	1094	897	31930
[OVER]	GO:0019222	regulation of metabolic process	BIOLOGICAL_PROCESS	1.18733e-12	5.88618e-15	84	1057	899	31967
[OVER]	GO:1901576	organic substance biosynthetic process	BIOLOGICAL_PROCESS	1.42986e-12	7.76364e-15	142	2365	841	30659
[OVER]	GO:0009058	biosynthetic process	BIOLOGICAL_PROCESS	1.6772e-12	9.50256e-15	145	2444	838	30580
[OVER]	GO:0044249	cellular biosynthetic process	BIOLOGICAL_PROCESS	1.75711e-12	1.03701e-14	140	2326	843	30698
[OVER]	GO:1901362	organic cyclic compound biosynthetic process	BIOLOGICAL_PROCESS	5.07722e-12	3.23619e-14	97	1369	886	31655
[OVER]	GO:0019438	aromatic compound biosynthetic process	BIOLOGICAL_PROCESS	1.39039e-11	9.19048e-14	94	1329	889	31695
[OVER]	GO:0034654	nucleobase-containing compound biosynthetic process	BIOLOGICAL_PROCESS	1.62519e-11	1.11262e-13	90	1247	893	31777
[OVER]	GO:0018130	heterocycle biosynthetic process	BIOLOGICAL_PROCESS	2.39215e-11	1.69416e-13	94	1344	889	31680
[OVER]	GO:0050794	regulation of cellular process	BIOLOGICAL_PROCESS	5.60791e-11	4.36877e-13	102	1547	881	31477
[OVER]	GO:0050789	regulation of biological process	BIOLOGICAL_PROCESS	1.85204e-10	1.48653e-12	104	1627	879	31397
[OVER]	GO:0065007	biological regulation	BIOLOGICAL_PROCESS	2.00651e-10	1.65789e-12	108	1723	875	31301
[OVER]	GO:0044271	cellular nitrogen compound biosynthetic process	BIOLOGICAL_PROCESS	2.09522e-10	1.78064e-12	112	1819	871	31205
[OVER]	GO:0015979	photosynthesis	BIOLOGICAL_PROCESS	3.08775e-10	2.69705e-12	18	56	965	32968
[OVER]	GO:0051254	positive regulation of RNA metabolic process	BIOLOGICAL_PROCESS	4.11908e-10	3.98683e-12	17	49	966	32975
[OVER]	GO:1903508	positive regulation of nucleic acid-templated transcription	BIOLOGICAL_PROCESS	4.11908e-10	3.98683e-12	17	49	966	32975
[OVER]	GO:0045893	positive regulation of transcription, DNA-templated	BIOLOGICAL_PROCESS	4.11908e-10	3.98683e-12	17	49	966	32975
[OVER]	GO:1902680	positive regulation of RNA biosynthetic process	BIOLOGICAL_PROCESS	4.11908e-10	3.98683e-12	17	49	966	32975
[OVER]	GO:0045935	positive regulation of nucleobase-containing compound metabolic process	BIOLOGICAL_PROCESS	5.24397e-10	5.1994e-12	17	50	966	32974
[OVER]	GO:0031328	positive regulation of cellular biosynthetic process	BIOLOGICAL_PROCESS	8.02381e-10	8.71329e-12	17	52	966	32972
[OVER]	GO:0010628	positive regulation of gene expression	BIOLOGICAL_PROCESS	8.02381e-10	8.71329e-12	17	52	966	32972
[OVER]	GO:0010557	positive regulation of macromolecule biosynthetic process	BIOLOGICAL_PROCESS	8.02381e-10	8.71329e-12	17	52	966	32972
[OVER]	GO:0009891	positive regulation of biosynthetic process	BIOLOGICAL_PROCESS	8.02381e-10	8.71329e-12	17	52	966	32972
[OVER]	GO:0045944	positive regulation of transcription by RNA polymerase II	BIOLOGICAL_PROCESS	5.72766e-09	6.89591e-11	15	43	968	32981
[OVER]	GO:0034645	cellular macromolecule biosynthetic process	BIOLOGICAL_PROCESS	2.60377e-08	3.19632e-10	105	1820	878	31204
[OVER]	GO:0009059	macromolecule biosynthetic process	BIOLOGICAL_PROCESS	2.62938e-08	3.28983e-10	105	1821	878	31203
[OVER]	GO:0051173	positive regulation of nitrogen compound metabolic process	BIOLOGICAL_PROCESS	5.95128e-08	7.72711e-10	17	73	966	32951
[OVER]	GO:0010604	positive regulation of macromolecule metabolic process	BIOLOGICAL_PROCESS	5.95128e-08	7.72711e-10	17	73	966	32951
[OVER]	GO:0031325	positive regulation of cellular metabolic process	BIOLOGICAL_PROCESS	8.20577e-08	1.10418e-09	17	75	966	32949
[OVER]	GO:0009893	positive regulation of metabolic process	BIOLOGICAL_PROCESS	8.20577e-08	1.10418e-09	17	75	966	32949
[OVER]	GO:0048518	positive regulation of biological process	BIOLOGICAL_PROCESS	7.25719e-07	1.0108e-08	18	101	965	32923
[OVER]	GO:0010467	gene expression	BIOLOGICAL_PROCESS	1.00358e-06	1.44519e-08	104	1937	879	31087
[OVER]	GO:0048522	positive regulation of cellular process	BIOLOGICAL_PROCESS	1.10277e-06	1.61406e-08	17	92	966	32932
[OVER]	GO:0016070	RNA metabolic process	BIOLOGICAL_PROCESS	1.48784e-06	2.2128e-08	87	1530	896	31494
[OVER]	GO:0044237	cellular metabolic process	BIOLOGICAL_PROCESS	1.60225e-06	2.42077e-08	222	5206	761	27818
[OVER]	GO:0006357	regulation of transcription by RNA polymerase II	BIOLOGICAL_PROCESS	1.2151e-05	1.92191e-07	16	98	967	32926
[OVER]	GO:0006366	transcription by RNA polymerase II	BIOLOGICAL_PROCESS	0.000218274	3.81309e-06	16	126	967	32898
[OVER]	GO:0006633	fatty acid biosynthetic process	BIOLOGICAL_PROCESS	0.000543296	9.87577e-06	9	40	974	32984
[OVER]	GO:0005992	trehalose biosynthetic process	BIOLOGICAL_PROCESS	0.000612981	1.12872e-05	6	13	977	33011
[OVER]	GO:0009987	cellular process	BIOLOGICAL_PROCESS	0.000618595	1.15366e-05	245	6370	738	26654
[OVER]	GO:0034641	cellular nitrogen compound metabolic process	BIOLOGICAL_PROCESS	0.000736527	1.39098e-05	120	2707	863	30317
[OVER]	GO:0005991	trehalose metabolic process	BIOLOGICAL_PROCESS	0.000822625	1.57301e-05	6	14	977	33010
[OVER]	GO:0046351	disaccharide biosynthetic process	BIOLOGICAL_PROCESS	0.00110981	2.14837e-05	6	15	977	33009
[OVER]	GO:0071704	organic substance metabolic process	BIOLOGICAL_PROCESS	0.00119409	2.3397e-05	236	6161	747	26863
[OVER]	GO:0090304	nucleic acid metabolic process	BIOLOGICAL_PROCESS	0.00146797	2.91098e-05	90	1924	893	31100
[OVER]	GO:0006631	fatty acid metabolic process	BIOLOGICAL_PROCESS	0.00151479	3.0396e-05	9	47	974	32977
[OVER]	GO:0019684	photosynthesis, light reaction	BIOLOGICAL_PROCESS	0.00179955	3.65349e-05	7	26	976	32998
[OVER]	GO:1901360	organic cyclic compound metabolic process	BIOLOGICAL_PROCESS	0.00181118	3.71985e-05	105	2350	878	30674
[OVER]	GO:0055114	oxidation-reduction process	BIOLOGICAL_PROCESS	0.00203554	4.22869e-05	66	1306	917	31718
[OVER]	GO:0046483	heterocycle metabolic process	BIOLOGICAL_PROCESS	0.00242177	5.08822e-05	102	2286	881	30738
[OVER]	GO:0055085	transmembrane transport	BIOLOGICAL_PROCESS	0.00342493	7.27677e-05	45	799	938	32225
[OVER]	GO:0009312	oligosaccharide biosynthetic process	BIOLOGICAL_PROCESS	0.00374979	8.05549e-05	6	20	977	33004
[OVER]	GO:0006725	cellular aromatic compound metabolic process	BIOLOGICAL_PROCESS	0.00433341	9.41156e-05	102	2325	881	30699
[OVER]	GO:0006139	nucleobase-containing compound metabolic process	BIOLOGICAL_PROCESS	0.00467918	0.00010273	96	2163	887	30861
[OVER]	GO:0034637	cellular carbohydrate biosynthetic process	BIOLOGICAL_PROCESS	0.00514582	0.00011419	10	71	973	32953
[OVER]	GO:0032502	developmental process	BIOLOGICAL_PROCESS	0.00730788	0.000163892	12	106	971	32918
[OVER]	GO:0044262	cellular carbohydrate metabolic process	BIOLOGICAL_PROCESS	0.00790144	0.00017907	13	124	970	32900
[OVER]	GO:0044283	small molecule biosynthetic process	BIOLOGICAL_PROCESS	0.00847027	0.00019596	21	279	962	32745
[OVER]	GO:0044281	small molecule metabolic process	BIOLOGICAL_PROCESS	0.0104439	0.000246551	40	722	943	32302
[OVER]	GO:0044238	primary metabolic process	BIOLOGICAL_PROCESS	0.0109747	0.000261672	220	5912	763	27112
[OVER]	GO:0005984	disaccharide metabolic process	BIOLOGICAL_PROCESS	0.0113498	0.000273496	6	26	977	32998
[OVER]	GO:0072330	monocarboxylic acid biosynthetic process	BIOLOGICAL_PROCESS	0.0113498	0.000275975	11	96	972	32928
[OVER]	GO:0032787	monocarboxylic acid metabolic process	BIOLOGICAL_PROCESS	0.0152191	0.000376654	12	117	971	32907
[OVER]	GO:0008610	lipid biosynthetic process	BIOLOGICAL_PROCESS	0.0152191	0.000377244	15	172	968	32852
[OVER]	GO:0016051	carbohydrate biosynthetic process	BIOLOGICAL_PROCESS	0.0201956	0.000505367	10	87	973	32937
[OVER]	GO:0009765	photosynthesis, light harvesting	BIOLOGICAL_PROCESS	0.0212671	0.000537201	5	19	978	33005
[OVER]	GO:0009311	oligosaccharide metabolic process	BIOLOGICAL_PROCESS	0.0274412	0.000719068	6	32	977	32992
[OVER]	GO:1901701	cellular response to oxygen-containing compound	BIOLOGICAL_PROCESS	0.0299751	0.000792543	5	21	978	33003
[OVER]	GO:0043605	cellular amide catabolic process	BIOLOGICAL_PROCESS	0.0312909	0.000834721	2	0	981	33024
[OVER]	GO:0044260	cellular macromolecule metabolic process	BIOLOGICAL_PROCESS	0.0341359	0.00091867	148	3848	835	29176
[OVER]	GO:0016053	organic acid biosynthetic process	BIOLOGICAL_PROCESS	0.0366768	0.00100437	16	211	967	32813
[OVER]	GO:0046394	carboxylic acid biosynthetic process	BIOLOGICAL_PROCESS	0.0366768	0.00100437	16	211	967	32813
[OVER]	GO:0006810	transport	BIOLOGICAL_PROCESS	0.0422251	0.00116627	60	1318	923	31706
[OVER]	GO:0048367	shoot system development	BIOLOGICAL_PROCESS	0.0438764	0.00122224	4	13	979	33011
[OVER]	GO:0051234	establishment of localization	BIOLOGICAL_PROCESS	0.0444227	0.00124795	60	1322	923	31702
[OVER]	GO:0009521	photosystem	CELLULAR_COMPONENT	2.52141e-07	3.45235e-09	11	25	972	32999
[OVER]	GO:0034357	photosynthetic membrane	CELLULAR_COMPONENT	8.43744e-07	1.1951e-08	11	29	972	32995
[OVER]	GO:0044436	thylakoid part	CELLULAR_COMPONENT	1.79017e-06	2.74696e-08	11	32	972	32992
[OVER]	GO:0009579	thylakoid	CELLULAR_COMPONENT	4.80347e-06	7.48417e-08	11	36	972	32988
[OVER]	GO:0016020	membrane	CELLULAR_COMPONENT	0.000280347	5.00584e-06	88	1780	895	31244
[OVER]	GO:0009523	photosystem II	CELLULAR_COMPONENT	0.000280347	5.02982e-06	7	18	976	33006
[OVER]	GO:0009522	photosystem I	CELLULAR_COMPONENT	0.00847027	0.000194645	4	7	979	33017
[OVER]	GO:0009538	photosystem I reaction center	CELLULAR_COMPONENT	0.00986328	0.000230516	3	2	980	33022
[OVER]	GO:0005634	nucleus	CELLULAR_COMPONENT	0.0221799	0.000565493	41	780	942	32244
[OVER]	GO:0003677	DNA binding	MOLECULAR_FUNCTION	3.68944e-13	9.58071e-16	104	1437	879	31587
[OVER]	GO:0003700	DNA-binding transcription factor activity	MOLECULAR_FUNCTION	4.15856e-13	1.17806e-15	46	348	937	32676
[OVER]	GO:0043565	sequence-specific DNA binding	MOLECULAR_FUNCTION	1.38964e-12	7.21721e-15	34	197	949	32827
[OVER]	GO:0140110	transcription regulator activity	MOLECULAR_FUNCTION	3.92576e-12	2.40958e-14	47	397	936	32627
[OVER]	GO:0001012	RNA polymerase II regulatory region DNA binding	MOLECULAR_FUNCTION	3.07879e-11	2.32581e-13	15	26	968	32998
[OVER]	GO:0000977	RNA polymerase II regulatory region sequence-specific DNA binding	MOLECULAR_FUNCTION	3.07879e-11	2.32581e-13	15	26	968	32998
[OVER]	GO:0001067	regulatory region nucleic acid binding	MOLECULAR_FUNCTION	1.93153e-09	2.2343e-11	15	39	968	32985
[OVER]	GO:0000976	transcription regulatory region sequence-specific DNA binding	MOLECULAR_FUNCTION	1.93153e-09	2.2343e-11	15	39	968	32985
[OVER]	GO:0044212	transcription regulatory region DNA binding	MOLECULAR_FUNCTION	1.93153e-09	2.2343e-11	15	39	968	32985
[OVER]	GO:1990837	sequence-specific double-stranded DNA binding	MOLECULAR_FUNCTION	3.3683e-09	3.97581e-11	15	41	968	32983
[OVER]	GO:0003690	double-stranded DNA binding	MOLECULAR_FUNCTION	1.9413e-05	3.11635e-07	16	102	967	32922
[OVER]	GO:0016746	transferase activity, transferring acyl groups	MOLECULAR_FUNCTION	2.18108e-05	3.55275e-07	24	227	959	32797
[OVER]	GO:0016747	transferase activity, transferring acyl groups other than amino-acyl groups	MOLECULAR_FUNCTION	5.09379e-05	8.4175e-07	21	188	962	32836
[OVER]	GO:0003676	nucleic acid binding	MOLECULAR_FUNCTION	8.33854e-05	1.39763e-06	137	3041	846	29983
[OVER]	GO:0003824	catalytic activity	MOLECULAR_FUNCTION	8.73446e-05	1.48461e-06	285	7410	698	25614
[OVER]	GO:0016491	oxidoreductase activity	MOLECULAR_FUNCTION	0.000114985	1.98156e-06	79	1505	904	31519
[OVER]	GO:0022857	transmembrane transporter activity	MOLECULAR_FUNCTION	0.0247345	0.000636464	41	785	942	32239
[OVER]	GO:0005215	transporter activity	MOLECULAR_FUNCTION	0.0262542	0.000681766	43	839	940	32185

## Sheet: GO terms-2
Enriched GO terms in the list of genes up-regulated in the REM compared to FM
Tags	GO ID	GO Name	GO Category	FDR	P-Value	Nr Test	Nr Reference	Non Annot Test	Non Annot Reference
[OVER]	GO:0009814	defense response, incompatible interaction	BIOLOGICAL_PROCESS	2.15248e-06	1.01628e-09	7	8	508	33484
[OVER]	GO:0009627	systemic acquired resistance	BIOLOGICAL_PROCESS	2.15248e-06	1.01628e-09	7	8	508	33484
[OVER]	GO:0002376	immune system process	BIOLOGICAL_PROCESS	9.71275e-06	1.14645e-08	7	13	508	33479
[OVER]	GO:0045087	innate immune response	BIOLOGICAL_PROCESS	9.71275e-06	1.14645e-08	7	13	508	33479
[OVER]	GO:0006955	immune response	BIOLOGICAL_PROCESS	9.71275e-06	1.14645e-08	7	13	508	33479
[OVER]	GO:0055085	transmembrane transport	BIOLOGICAL_PROCESS	2.0169e-05	3.33292e-08	36	808	479	32684
[OVER]	GO:0098542	defense response to other organism	BIOLOGICAL_PROCESS	0.000227311	8.04926e-07	8	42	507	33450
[OVER]	GO:0043207	response to external biotic stimulus	BIOLOGICAL_PROCESS	0.000227311	8.04926e-07	8	42	507	33450
[OVER]	GO:0051707	response to other organism	BIOLOGICAL_PROCESS	0.000227311	8.04926e-07	8	42	507	33450
[OVER]	GO:0050789	regulation of biological process	BIOLOGICAL_PROCESS	0.000626391	2.36597e-06	52	1679	463	31813
[OVER]	GO:0006810	transport	BIOLOGICAL_PROCESS	0.000804691	3.2294e-06	44	1334	471	32158
[OVER]	GO:0051234	establishment of localization	BIOLOGICAL_PROCESS	0.000818084	3.47628e-06	44	1338	471	32154
[OVER]	GO:0051179	localization	BIOLOGICAL_PROCESS	0.000927015	4.48524e-06	44	1352	471	32140
[OVER]	GO:0065007	biological regulation	BIOLOGICAL_PROCESS	0.00209008	1.13484e-05	52	1779	463	31713
[OVER]	GO:0050794	regulation of cellular process	BIOLOGICAL_PROCESS	0.0022748	1.34254e-05	48	1601	467	31891
[OVER]	GO:0009605	response to external stimulus	BIOLOGICAL_PROCESS	0.0022748	1.34112e-05	8	64	507	33428
[OVER]	GO:0008152	metabolic process	BIOLOGICAL_PROCESS	0.00262273	1.6098e-05	165	7977	350	25515
[OVER]	GO:0006811	ion transport	BIOLOGICAL_PROCESS	0.00262592	1.67374e-05	20	422	495	33070
[OVER]	GO:0060255	regulation of macromolecule metabolic process	BIOLOGICAL_PROCESS	0.00442188	3.13164e-05	36	1102	479	32390
[OVER]	GO:0019222	regulation of metabolic process	BIOLOGICAL_PROCESS	0.00451798	3.30636e-05	36	1105	479	32387
[OVER]	GO:0051171	regulation of nitrogen compound metabolic process	BIOLOGICAL_PROCESS	0.00452415	3.52448e-05	35	1064	480	32428
[OVER]	GO:0031323	regulation of cellular metabolic process	BIOLOGICAL_PROCESS	0.00452415	3.52448e-05	35	1064	480	32428
[OVER]	GO:0080090	regulation of primary metabolic process	BIOLOGICAL_PROCESS	0.00455506	3.65609e-05	35	1066	480	32426
[OVER]	GO:1903506	regulation of nucleic acid-templated transcription	BIOLOGICAL_PROCESS	0.00577779	5.86508e-05	33	1003	482	32489
[OVER]	GO:0006355	regulation of transcription, DNA-templated	BIOLOGICAL_PROCESS	0.00577779	5.86508e-05	33	1003	482	32489
[OVER]	GO:2001141	regulation of RNA biosynthetic process	BIOLOGICAL_PROCESS	0.00577779	5.86508e-05	33	1003	482	32489
[OVER]	GO:0051252	regulation of RNA metabolic process	BIOLOGICAL_PROCESS	0.00589779	6.42683e-05	33	1008	482	32484
[OVER]	GO:0010468	regulation of gene expression	BIOLOGICAL_PROCESS	0.00589779	6.35383e-05	34	1052	481	32440
[OVER]	GO:0009607	response to biotic stimulus	BIOLOGICAL_PROCESS	0.00589779	6.3236e-05	8	81	507	33411
[OVER]	GO:0051704	multi-organism process	BIOLOGICAL_PROCESS	0.00589779	6.82228e-05	11	161	504	33331
[OVER]	GO:2000112	regulation of cellular macromolecule biosynthetic process	BIOLOGICAL_PROCESS	0.00603651	7.56208e-05	33	1017	482	32475
[OVER]	GO:0009889	regulation of biosynthetic process	BIOLOGICAL_PROCESS	0.00603651	7.83777e-05	33	1019	482	32473
[OVER]	GO:0031326	regulation of cellular biosynthetic process	BIOLOGICAL_PROCESS	0.00603651	7.83777e-05	33	1019	482	32473
[OVER]	GO:0010556	regulation of macromolecule biosynthetic process	BIOLOGICAL_PROCESS	0.00603651	7.56208e-05	33	1017	482	32475
[OVER]	GO:0019219	regulation of nucleobase-containing compound metabolic process	BIOLOGICAL_PROCESS	0.00603651	7.83777e-05	33	1019	482	32473
[OVER]	GO:0006351	transcription, DNA-templated	BIOLOGICAL_PROCESS	0.0201624	0.000290347	34	1144	481	32348
[OVER]	GO:0097659	nucleic acid-templated transcription	BIOLOGICAL_PROCESS	0.0201624	0.000290347	34	1144	481	32348
[OVER]	GO:0032774	RNA biosynthetic process	BIOLOGICAL_PROCESS	0.0204524	0.00029935	34	1146	481	32346
[OVER]	GO:0034654	nucleobase-containing compound biosynthetic process	BIOLOGICAL_PROCESS	0.0440353	0.000696497	36	1301	479	32191
[OVER]	GO:0016602	CCAAT-binding factor complex	CELLULAR_COMPONENT	9.89103e-05	2.56849e-07	4	1	511	33491
[OVER]	GO:0031224	intrinsic component of membrane	CELLULAR_COMPONENT	0.000227311	7.85115e-07	34	846	481	32646
[OVER]	GO:0016021	integral component of membrane	CELLULAR_COMPONENT	0.000871405	3.90857e-06	32	831	483	32661
[OVER]	GO:0016020	membrane	CELLULAR_COMPONENT	0.000927015	4.59568e-06	54	1814	461	31678
[OVER]	GO:0044425	membrane part	CELLULAR_COMPONENT	0.00354446	2.42656e-05	35	1044	480	32448
[OVER]	GO:0090575	RNA polymerase II transcription factor complex	CELLULAR_COMPONENT	0.0182046	0.000253558	4	17	511	33475
[OVER]	GO:0005215	transporter activity	MOLECULAR_FUNCTION	2.0169e-05	3.27061e-08	37	845	478	32647
[OVER]	GO:0022857	transmembrane transporter activity	MOLECULAR_FUNCTION	3.22846e-05	6.09719e-08	35	791	480	32701
[OVER]	GO:0033293	monocarboxylic acid binding	MOLECULAR_FUNCTION	7.83298e-05	1.84914e-07	5	5	510	33487
[OVER]	GO:0005504	fatty acid binding	MOLECULAR_FUNCTION	7.83298e-05	1.84914e-07	5	5	510	33487
[OVER]	GO:0003677	DNA binding	MOLECULAR_FUNCTION	0.000963395	5.00347e-06	47	1494	468	31998
[OVER]	GO:0140110	transcription regulator activity	MOLECULAR_FUNCTION	0.00270093	1.78531e-05	20	424	495	33068
[OVER]	GO:0003700	DNA-binding transcription factor activity	MOLECULAR_FUNCTION	0.00468135	3.86797e-05	18	376	497	33116
[OVER]	GO:0016758	transferase activity, transferring hexosyl groups	MOLECULAR_FUNCTION	0.00470316	3.99702e-05	18	377	497	33115
[OVER]	GO:0015075	ion transmembrane transporter activity	MOLECULAR_FUNCTION	0.00569127	4.97113e-05	17	348	498	33144
[OVER]	GO:0031406	carboxylic acid binding	MOLECULAR_FUNCTION	0.00577779	5.75663e-05	5	23	510	33469
[OVER]	GO:0043177	organic acid binding	MOLECULAR_FUNCTION	0.00577779	5.75663e-05	5	23	510	33469
[OVER]	GO:0015291	secondary active transmembrane transporter activity	MOLECULAR_FUNCTION	0.00577779	5.76382e-05	10	130	505	33362
[OVER]	GO:0022804	active transmembrane transporter activity	MOLECULAR_FUNCTION	0.00589779	6.78119e-05	14	254	501	33238
[OVER]	GO:0003855	3-dehydroquinate dehydratase activity	MOLECULAR_FUNCTION	0.00589779	6.67521e-05	3	3	512	33489
[OVER]	GO:0008289	lipid binding	MOLECULAR_FUNCTION	0.00602044	7.10627e-05	9	107	506	33385
[OVER]	GO:0015318	inorganic molecular entity transmembrane transporter activity	MOLECULAR_FUNCTION	0.00698477	9.23388e-05	16	331	499	33161
[OVER]	GO:0043167	ion binding	MOLECULAR_FUNCTION	0.0104594	0.000140743	104	4754	411	28738
[OVER]	GO:0005488	binding	MOLECULAR_FUNCTION	0.012588	0.000172357	211	11142	304	22350
[OVER]	GO:0008144	drug binding	MOLECULAR_FUNCTION	0.0205298	0.00030533	53	2084	462	31408
[OVER]	GO:0097159	organic cyclic compound binding	MOLECULAR_FUNCTION	0.0274354	0.000427465	127	6230	388	27262
[OVER]	GO:0043168	anion binding	MOLECULAR_FUNCTION	0.0274354	0.000420611	67	2850	448	30642
[OVER]	GO:1901363	heterocyclic compound binding	MOLECULAR_FUNCTION	0.0274354	0.000427465	127	6230	388	27262
[OVER]	GO:0032559	adenyl ribonucleotide binding	MOLECULAR_FUNCTION	0.0466526	0.000748909	56	2326	459	31166
[OVER]	GO:0030554	adenyl nucleotide binding	MOLECULAR_FUNCTION	0.0473438	0.000771181	56	2329	459	31163
