# Supplementary material for: Gene Expression Profiling of the Shoot Meristematic Tissues in Woodland Strawberry Fragaria vesca
Source: Front Plant Sci. 2019 Dec 13;10:1624. doi: 10.3389/fpls.2019.01624 (PMC6923813; doi:10.3389/fpls.2019.01624)
Supplement: Supplementary file 2 [file DataSheet_2.xlsx]

## Sheet: DEG
Supplementary Data 2. DEGs between Flower_1-4 and Receptacle_6-7
Up-regulation: increased in Receptacle_6-7; down-regulation: reduced in Receptacle_6-7
Genes with log2FoldChange >1.0 and a padj < 0.05 are shown.
Gene ID	log2FoldChange	p-value	padj	Regulation	Symbol	Description
FvH4_4g29650	6.12129	2.33451e-65	5.27505e-61	up	ATUTR2,UTR2	UDP-galactose transporter 2
FvH4_6g41500	4.09504	2.1262e-17	1.60145e-13	up
FvH4_1g12090	2.85147	1.13794e-15	6.42822e-12	up		Lactoylglutathione lyase / glyoxalase I family protein
FvH4_6g07170	2.81595	2.90273e-15	1.09317e-11	up		Polynucleotidyl transferase, ribonuclease H-like superfamily protein
FvH4_6g37880	3.50498	4.06677e-15	1.31275e-11	up	AGL1,SHP1	K-box region and MADS-box transcription factor family protein
FvH4_1g13440	2.93014	4.00245e-14	1.00488e-10	up		Sulfite exporter TauE/SafE family protein
FvH4_5g18321	3.23252	9.30118e-14	2.10169e-10	up		Bifunctional inhibitor/lipid-transfer protein/seed storage 2S albumin superfamily protein
FvH4_4g11920	3.38963	2.75048e-13	5.64998e-10	up	DIR1	Bifunctional inhibitor/lipid-transfer protein/seed storage 2S albumin superfamily protein
FvH4_6g46340	2.10222	9.43005e-13	1.77568e-09	up		Pollen Ole e 1 allergen and extensin family protein
FvH4_4g02460	2.52336	4.11196e-12	6.63671e-09	up
FvH4_3g39570	2.93681	9.38449e-12	1.24736e-08	up		UDP-Glycosyltransferase superfamily protein
FvH4_5g30710	2.51389	9.10909e-12	1.24736e-08	up	ATBXL4,XYL4	beta-D-xylosidase 4
FvH4_3g04730	2.08982	1.30246e-11	1.63502e-08	up		Dof-type zinc finger DNA-binding family protein
FvH4_4g02480	2.10093	5.12372e-11	6.09345e-08	up
FvH4_4g35800	2.79947	3.29562e-10	3.3849e-07	up	NRT1.7	nitrate transporter 1.7
FvH4_5g28980	2.01105	4.03091e-10	3.9601e-07	up	AKT2,AKT2/3,AKT3,KT2/3	potassium transport 2/3
FvH4_3g21060	2.24388	1.16262e-09	1.09461e-06	up	ATCNGC4,CNGC4,DND2,HLM1	cyclic nucleotide-gated cation channel 4
FvH4_1g28120	3.1271	1.06765e-08	9.27869e-06	up	GDH1	glutamate dehydrogenase 1
FvH4_6g35830	2.10267	2.17788e-08	1.69694e-05	up	ATPME3,PME3	pectin methylesterase 3
FvH4_6g12720	2.53939	2.43745e-08	1.83589e-05	up
FvH4_6g06180	1.70807	2.62842e-08	1.91587e-05	up	ATSNF4,SNF4	homolog of yeast sucrose nonfermenting 4
FvH4_7g15040	1.96029	2.81588e-08	1.98836e-05	up		Pectin lyase-like superfamily protein
FvH4_1g01771	2.85473	3.35771e-08	2.29911e-05	up
FvH4_3g06720	2.19115	3.54838e-08	2.35821e-05	up	AG	K-box region and MADS-box transcription factor family protein
FvH4_3g01740	2.10566	4.06731e-08	2.55291e-05	up	SLP3	subtilisin-like serine protease 3
FvH4_1g06290	2.59996	5.87954e-08	3.49616e-05	up		MATE efflux family protein
FvH4_4g20720	1.93136	7.47241e-08	4.26953e-05	up
FvH4_5g16630	1.89288	8.45896e-08	4.61495e-05	up
FvH4_3g07770	3.72994	9.94173e-08	4.99207e-05	up	LSH10	Protein of unknown function (DUF640)
FvH4_5g29070	2.13251	1.1029e-07	5.41766e-05	up		Plant L-ascorbate oxidase
FvH4_6g47520	2.07537	1.35239e-07	6.50184e-05	up	ATCNGC2,CNGC2,DND1	Cyclic nucleotide-regulated ion channel family protein
FvH4_2g35700	2.01501	1.66056e-07	7.35725e-05	up	TIP4;1	tonoplast intrinsic protein 4;1
FvH4_6g28840	2.53536	1.95754e-07	8.50625e-05	up		C2H2 and C2HC zinc fingers superfamily protein
FvH4_6g14150	2.12701	3.41105e-07	0.000145427	up	ATCHX20,CHX20	cation/H+ exchanger 20
FvH4_6g39260	1.60258	3.84499e-07	0.000160891	up		Bifunctional inhibitor/lipid-transfer protein/seed storage 2S albumin superfamily protein
FvH4_1g06090	1.9503	4.22426e-07	0.000171401	up		Senescence/dehydration-associated protein-related
FvH4_6g08500	1.74999	5.01583e-07	0.000198838	up	APA1,ATAPA1	aspartic proteinase A1
FvH4_7g00440	1.69557	6.8229e-07	0.000265811	up	ATLOX2,LOX2	lipoxygenase 2
FvH4_1g20060	2.23597	8.92856e-07	0.000341949	up
FvH4_4g19350	2.0863	1.76099e-06	0.000612175	up	ATBXL1,BXL1	beta-xylosidase 1
FvH4_6g32160	1.5879	1.82377e-06	0.000624394	up		Uncharacterised protein family (UPF0497)
FvH4_4g11910	2.19051	1.89895e-06	0.000640427	up	DIR1	Bifunctional inhibitor/lipid-transfer protein/seed storage 2S albumin superfamily protein
FvH4_3g05310	1.88445	2.70971e-06	0.00090042	up	AtRLP29,RLP29	receptor like protein 29
FvH4_5g05280	1.58166	3.81665e-06	0.00119779	up	ATMYB66,MYB66,WER,WER1	myb domain protein 66
FvH4_7g05090	1.50447	3.80377e-06	0.00119779	up		Leucine-rich repeat protein kinase family protein
FvH4_3g21020	1.53095	3.96568e-06	0.00122751	up	LHCB3,LHCB3*1	light-harvesting chlorophyll B-binding protein 3
FvH4_4g19610	1.89877	4.2202e-06	0.00128864	up		Acyl-CoA N-acyltransferases (NAT) superfamily protein
FvH4_6g10740	3.719	4.77027e-06	0.00143719	up	PYL4,RCAR10	PYR1-like 4
FvH4_4g25500	1.75002	5.6013e-06	0.00162265	up		MATE efflux family protein
FvH4_5g39660	1.68806	5.76896e-06	0.00165007	up		P-loop containing nucleoside triphosphate hydrolases superfamily protein
FvH4_5g09020	1.47639	5.85147e-06	0.00165275	up		DNA binding;ATP binding
FvH4_4g11960	2.26735	6.2793e-06	0.00173033	up		UDP-Glycosyltransferase superfamily protein
FvH4_3g02900	2.00274	6.37891e-06	0.0017366	up		Sulfite exporter TauE/SafE family protein
FvH4_3g04940	2.51749	8.79541e-06	0.00225842	up		Tetraspanin family protein
FvH4_6g42740	1.64834	9.90197e-06	0.00248605	up	CYP74B2,HPL1	hydroperoxide lyase 1
FvH4_7g26790	2.67933	9.80899e-06	0.00248605	up	CYCP4;1	cyclin p4;1
FvH4_1g17390	1.59405	1.07895e-05	0.00267911	up		Acetamidase/Formamidase family protein
FvH4_6g40584	1.9876	1.11751e-05	0.00274471	up	G6PD2	glucose-6-phosphate dehydrogenase 2
FvH4_5g35540	1.53974	1.23386e-05	0.00296599	up		Eukaryotic aspartyl protease family protein
FvH4_2g33440	1.77268	1.29446e-05	0.0030789	up	APUM12,PUM12	pumilio 12
FvH4_6g07171	2.45741	1.43753e-05	0.00338358	up		Protein of unknown function (DUF3511)
FvH4_3g02831	2.59839	1.45476e-05	0.00338884	up		MATE efflux family protein
FvH4_6g20860	1.54378	1.56349e-05	0.00356854	up	FLA17	FASCICLIN-like arabinogalactan protein 17 precursor
FvH4_7g12040	2.04322	1.62508e-05	0.00367202	up	AHL22	AT-hook motif nuclear-localized protein 22
FvH4_7g25560	1.89433	1.67328e-05	0.00374351	up		Major facilitator superfamily protein
FvH4_1g13970	1.9051	1.72334e-05	0.00378144	up		UDP-Glycosyltransferase superfamily protein
FvH4_1g14670	1.44892	2.31913e-05	0.00486852	up	REM39,VRN1	AP2/B3-like transcriptional factor family protein
FvH4_4g26090	1.65151	2.32696e-05	0.00486852	up	KNAT6,KNAT6L,KNAT6S	KNOTTED1-like homeobox gene 6
FvH4_4g24900	1.43951	2.36548e-05	0.0049037	up		Leucine-rich repeat protein kinase family protein
FvH4_5g05780	1.397	2.42517e-05	0.00498173	up		Leucine-rich receptor-like protein kinase family protein
FvH4_2g33770	1.76319	2.67736e-05	0.00545023	up		N-terminal nucleophile aminohydrolases (Ntn hydrolases) superfamily protein
FvH4_1g20820	1.48098	2.99755e-05	0.00599404	up
FvH4_1g13190	2.3134	3.77486e-05	0.00735317	up		alpha/beta-Hydrolases superfamily protein
FvH4_1g19194	1.51887	3.93631e-05	0.00760212	up		Rhamnogalacturonate lyase family protein
FvH4_2g03570	1.8013	4.00896e-05	0.00767682	up	scpl1	serine carboxypeptidase-like 1
FvH4_6g48800	1.31678	4.11446e-05	0.00781264	up		Ankyrin repeat family protein
FvH4_6g39983	1.9327	4.70998e-05	0.00879559	up	LAC14	laccase 14
FvH4_7g07720	1.71291	4.84732e-05	0.00897788	up		AP2/B3-like transcriptional factor family protein
FvH4_7g17080	1.74863	5.15703e-05	0.00947384	up		Calcium-binding EF-hand family protein
FvH4_3g06120	1.90373	5.21202e-05	0.00949764	up	LHB1B1,LHCB1.4	light-harvesting chlorophyll-protein complex II subunit B1
FvH4_6g39970	1.64802	5.53253e-05	0.010001	up	LAC14	laccase 14
FvH4_1g27290	1.38421	6.48258e-05	0.0113551	up
FvH4_2g17830	1.97354	6.44435e-05	0.0113551	up	DIR1	Bifunctional inhibitor/lipid-transfer protein/seed storage 2S albumin superfamily protein
FvH4_5g20950	2.65807	7.16948e-05	0.0122728	up		Plant invertase/pectin methylesterase inhibitor superfamily protein
FvH4_6g20920	1.58544	7.29877e-05	0.0124002	up
FvH4_2g37381	1.29846	7.76173e-05	0.0130884	up	SBE2.2	starch branching enzyme 2.2
FvH4_6g37770	1.555	7.99955e-05	0.0133895	up	AtRLP29,RLP29	receptor like protein 29
FvH4_1g07950	1.31496	8.54445e-05	0.0140927	up	LUT2	Lycopene beta/epsilon cyclase protein
FvH4_5g06740	1.49129	9.43833e-05	0.0153431	up	BT1	BTB and TAZ domain protein 1
FvH4_4g17600	1.45442	9.88727e-05	0.015958	up		Protein kinase superfamily protein
FvH4_4g30310	1.65443	0.000107042	0.0167629	up	BGLU40	beta glucosidase 40
FvH4_7g01720	1.46536	0.000133302	0.0202154	up	AGL15	AGAMOUS-like 15
FvH4_1g27440	4.10308	0.000140428	0.021014	up	AAE12	acyl activating enzyme 12
FvH4_6g02980	1.20311	0.000140028	0.021014	up	GME	GDP-D-mannose 3',5'-epimerase
FvH4_5g30940	1.18928	0.000144108	0.0214229	up	CP24,LHCB6	light harvesting complex photosystem II subunit 6
FvH4_6g11493	2.1847	0.000148849	0.0219829	up	ATCAX1,CAX1,RCI4	cation exchanger 1
FvH4_6g07460	1.32742	0.00015684	0.0230128	up	KNAT6,KNAT6L,KNAT6S	KNOTTED1-like homeobox gene 6
FvH4_2g05530	1.4264	0.000159018	0.0231817	up		Leucine-rich repeat (LRR) family protein
FvH4_4g07370	1.16938	0.000160177	0.023201	up		PA-domain containing subtilase family protein
FvH4_2g38090	2.29924	0.000161269	0.0232104	up	ATSBT5.2	Subtilisin-like serine endopeptidase family protein
FvH4_7g10640	1.53063	0.000170728	0.0244163	up	SPL8	squamosa promoter binding protein-like 8
FvH4_4g17210	1.26111	0.000178063	0.0253051	up	CYP78A7	cytochrome P450, family 78, subfamily A, polypeptide 7
FvH4_1g01772	1.83497	0.000185835	0.0261315	up
FvH4_2g34260	1.33744	0.000186191	0.0261315	up	AT-HSFB4,HSFB4,SCZ	heat shock transcription factor B4
FvH4_7g10310	1.41208	0.000195615	0.0271172	up
FvH4_2g03560	1.92845	0.000208501	0.0284912	up	scpl18	serine carboxypeptidase-like 18
FvH4_5g18850	2.52176	0.00020938	0.0284912	up
FvH4_1g28352	1.6018	0.000215203	0.0289448	up		Glycosyl hydrolase family protein
FvH4_1g22820	2.25274	0.00022606	0.0300474	up	ATWRKY51,WRKY51	WRKY DNA-binding protein 51
FvH4_5g15510	1.85394	0.000241395	0.0317126	up	ATNRT1:2,NRT1:2,NTL1	nitrate transporter 1:2
FvH4_7g28350	1.5206	0.000245612	0.03208	up	CYP704A1	cytochrome P450, family 704, subfamily A, polypeptide 1
FvH4_3g36020	3.88728	0.000251578	0.0326705	up	MT2B	metallothionein 2B
FvH4_1g02570	1.59775	0.00026176	0.0337984	up		Bifunctional inhibitor/lipid-transfer protein/seed storage 2S albumin superfamily protein
FvH4_2g38400	1.62094	0.000269949	0.0346577	up	TUB1	tubulin beta-1 chain
FvH4_6g45370	1.33971	0.000276307	0.0352737	up	AOC4	allene oxide cyclase 4
FvH4_1g06350	1.73268	0.000278322	0.0353313	up		Pectin lyase-like superfamily protein
FvH4_3g17550	1.62518	0.000291627	0.036609	up	AtUGT85A3,UGT85A3	UDP-glucosyl transferase 85A3
FvH4_5g17450	1.16532	0.0003011	0.0373827	up		ketose-bisphosphate aldolase class-II family protein
FvH4_2g15050	1.72771	0.000305382	0.0377072	up	ARPN	plantacyanin
FvH4_6g34220	1.59791	0.000331375	0.0406943	up		hydroxyproline-rich glycoprotein family protein
FvH4_3g40180	1.50711	0.000354144	0.0427927	up		Peroxidase superfamily protein
FvH4_6g26030	1.24673	0.000352392	0.0427927	up	RBCS1A	ribulose bisphosphate carboxylase small chain 1A
FvH4_4g03750	2.15924	0.000372254	0.0445051	up	LSH6	Protein of unknown function (DUF640)
FvH4_1g25160	1.41071	0.00039683	0.0467019	up		Eukaryotic aspartyl protease family protein
FvH4_3g45290	1.80983	0.000404132	0.0470819	up		Amino acid permease family protein
FvH4_4g12350	1.34258	0.00040631	0.0470819	up		Leucine-rich receptor-like protein kinase family protein
FvH4_6g06090	1.31973	0.000405149	0.0470819	up	ATLOX1,LOX1	lipoxygenase 1
FvH4_7g24120	1.48772	0.000418176	0.0482097	up	PIP1;4,PIP1E,TMP-C	plasma membrane intrinsic protein 1;4
FvH4_1g24520	1.06828	0.000430237	0.0486081	up		ABC-2 type transporter family protein
FvH4_2g35900	1.33101	0.000426438	0.0486081	up		alpha/beta-Hydrolases superfamily protein
FvH4_3g35230	1.66335	0.000428562	0.0486081	up
FvH4_3g16730	-2.93361	2.59186e-18	2.92828e-14	down	ATNCED3,NCED3,SIS7,STO1	nine-cis-epoxycarotenoid dioxygenase 3
FvH4_4g02430	-3.29968	2.77173e-15	1.09317e-11	down
FvH4_4g02520	-2.77972	9.20815e-15	2.60084e-11	down		Plant protein of unknown function (DUF247)
FvH4_6g45800	-2.69647	2.53384e-12	4.4042e-09	down		Late embryogenesis abundant protein (LEA) family protein
FvH4_5g38280	-2.34528	8.83231e-12	1.24736e-08	down	ATGPAT3,GPAT3	glycerol-3-phosphate acyltransferase 3
FvH4_7g19720	-2.96341	2.38146e-10	2.69057e-07	down		Protein kinase superfamily protein
FvH4_5g09660	-2.48732	2.70123e-10	2.90652e-07	down	LFY,LFY3	floral meristem identity control protein LEAFY (LFY)
FvH4_1g21200	-2.52075	1.42114e-09	1.28448e-06	down		Haloacid dehalogenase-like hydrolase (HAD) superfamily protein
FvH4_1g19710	-2.19365	1.6314e-08	1.31654e-05	down	AGL22,SVP	K-box region and MADS-box transcription factor family protein
FvH4_2g34930	-1.96527	1.61238e-08	1.31654e-05	down		Protein of unknown function, DUF547
FvH4_6g09750	-2.00085	3.95087e-08	2.55068e-05	down	ATWRKY70,WRKY70	WRKY DNA-binding protein 70
FvH4_1g04480	-2.74498	5.26587e-08	3.21588e-05	down	ADS3,FAD5,FADB,JB67	fatty acid desaturase 5
FvH4_6g42800	-2.05516	7.55803e-08	4.26953e-05	down	ATCSLB04,ATCSLB4,CSLB04	cellulose synthase-like B4
FvH4_4g18990	-2.24938	8.57797e-08	4.61495e-05	down	MLP423	MLP-like protein 423
FvH4_4g29600	-2.24316	8.83024e-08	4.64019e-05	down	AGL7,AP1	K-box region and MADS-box transcription factor family protein
FvH4_2g27860	-2.64482	9.90535e-08	4.99207e-05	down	PI	K-box region and MADS-box transcription factor family protein
FvH4_3g16760	-2.2852	1.42389e-07	6.70295e-05	down	ATGA2OX1,GA2OX1	Arabidopsis thaliana gibberellin 2-oxidase 1
FvH4_1g01070	-2.34113	1.57793e-07	7.26644e-05	down	ATCIPK6,CIPK6,SIP3,SNRK3.14	SOS3-interacting protein 3
FvH4_1g18270	-1.58698	1.6079e-07	7.26644e-05	down	ANT,CKC,CKC1,DRG	Integrase-type DNA-binding superfamily protein
FvH4_6g39031	-1.98526	4.24786e-07	0.000171401	down	WAKL1	wall associated kinase-like 1
FvH4_2g27870	-2.22558	1.03961e-06	0.000385098	down	PI	K-box region and MADS-box transcription factor family protein
FvH4_3g06840	-1.90827	1.0274e-06	0.000385098	down		Leucine-rich repeat transmembrane protein kinase
FvH4_4g31000	-1.84931	1.22841e-06	0.000447694	down	ATMIXTA,ATMYB16,MYB16	myb domain protein 16
FvH4_6g09970	-2.03316	1.30564e-06	0.00046829	down	LTP4	lipid transfer protein 4
FvH4_6g32640	-2.01705	1.49073e-06	0.000526322	down		GDSL-like Lipase/Acylhydrolase superfamily protein
FvH4_5g30170	-1.66206	3.22018e-06	0.00105454	down	ARPN	plantacyanin
FvH4_4g05050	-2.53078	3.59674e-06	0.00116103	down		AWPM-19-like family protein
FvH4_1g20400	-1.93836	4.96818e-06	0.00147712	down	ABCG11,ATWBC11,COF1,DSO,WBC11	white-brown complex homolog protein 11
FvH4_7g28453	-2.14524	5.59189e-06	0.00162265	down	CYP704A2	cytochrome P450, family 704, subfamily A, polypeptide 2
FvH4_3g30950	-2.09982	6.01166e-06	0.00167703	down	AtMYB36,MYB36	myb domain protein 36
FvH4_6g02460	-1.39088	6.53488e-06	0.00175788	down	AN3,ATGIF1,GIF,GIF1	SSXT family protein
FvH4_3g04100	-2.04664	6.98412e-06	0.00185663	down		Haloacid dehalogenase-like hydrolase (HAD) superfamily protein
FvH4_6g10010	-1.9404	7.1656e-06	0.00188272	down	ATEXP8,ATEXPA8,ATHEXP,ALPHA,1.11,EXP8,EXPA8	expansin A8
FvH4_7g08930	-2.14538	7.72129e-06	0.00200541	down		Protein kinase superfamily protein
FvH4_3g34320	-2.05059	1.1972e-05	0.00290881	down
FvH4_5g11900	-2.36674	1.49085e-05	0.00343747	down		Plant protein of unknown function (DUF247)
FvH4_4g06020	-1.7037	1.72371e-05	0.00378144	down		NB-ARC domain-containing disease resistance protein
FvH4_2g19680	-1.57318	1.96148e-05	0.0042617	down
FvH4_3g43040	-1.52893	2.19588e-05	0.00472553	down	NTT,WIP2	C2H2-type zinc finger family protein
FvH4_4g28250	-2.04916	2.2457e-05	0.00478715	down		Leucine-rich repeat (LRR) family protein
FvH4_6g15180	-1.46087	2.89311e-05	0.00583684	down	RAP2.7,TOE1	related to AP2.7
FvH4_6g41830	-2.16797	3.26785e-05	0.00647723	down
FvH4_4g28851	-2.3436	3.32695e-05	0.00653703	down
FvH4_3g38970	-1.68256	4.45715e-05	0.00839282	down	ASN1,AT-ASN1,DIN6	glutamine-dependent asparagine synthase 1
FvH4_6g01370	-2.0094	5.66774e-05	0.0101641	down		GDSL-like Lipase/Acylhydrolase superfamily protein
FvH4_4g28110	-2.24977	6.47184e-05	0.0113551	down		NAD(P)-binding Rossmann-fold superfamily protein
FvH4_7g12700	-1.89354	6.53975e-05	0.0113671	down	AGL20,ATSOC1,SOC1	AGAMOUS-like 20
FvH4_1g12260	-1.82864	7.12091e-05	0.0122728	down	AP3,ATAP3	K-box region and MADS-box transcription factor family protein
FvH4_6g02090	-1.4876	8.13821e-05	0.0135214	down	ATPPCK1,PPCK1	phosphoenolpyruvate carboxylase kinase 1
FvH4_2g31640	-1.48666	8.90753e-05	0.0145851	down	EDA39	calmodulin-binding family protein
FvH4_4g32750	-1.90593	0.000104032	0.0166065	down	MLP28	MLP-like protein 28
FvH4_6g28770	-1.43165	0.00010436	0.0166065	down	CYP77B1	cytochrome P450, family 77, subfamily B, polypeptide 1
FvH4_2g40960	-1.57766	0.000107497	0.0167629	down		Transcriptional factor B3 family protein
FvH4_6g40300	-1.59834	0.000107568	0.0167629	down	AIR3	Subtilisin-like serine endopeptidase family protein
FvH4_2g34870	-1.56369	0.000113893	0.0176268	down	ATRBP47C,RBP47C	RNA-binding protein 47C
FvH4_2g38120	-1.4776	0.000120257	0.0184853	down		GDSL-like Lipase/Acylhydrolase superfamily protein
FvH4_3g21400	-1.32619	0.000124502	0.0190085	down		S-locus lectin protein kinase family protein
FvH4_5g11640	-2.05301	0.000190456	0.0265651	down	ABIL2	ABL interactor-like protein 2
FvH4_3g12960	-1.32016	0.00021057	0.0284912	down	UFO	F-box family protein
FvH4_7g34200	-1.73394	0.000210439	0.0284912	down		GroES-like zinc-binding dehydrogenase family protein
FvH4_4g30640	-2.19059	0.000216736	0.0289784	down	WRKY3	WRKY DNA-binding protein 3
FvH4_3g17220	-1.78269	0.000231036	0.0305292	down	CYP72A15	cytochrome P450, family 72, subfamily A, polypeptide 15
FvH4_2g31100	-1.64079	0.000282599	0.0356738	down	ATMYB123,ATTT2,MYB123,TT2	Duplicated homeodomain-like superfamily protein
FvH4_3g25080	-1.93429	0.000294441	0.036758	down		Ankyrin repeat family protein
FvH4_5g05690	-2.02118	0.000341863	0.0417554	down
FvH4_1g18630	-2.62155	0.00036692	0.0441007	down	ATGER3,GER3,GLP3,GLP3A,GLP3B	germin 3
FvH4_6g01420	-1.31438	0.000388936	0.0462547	down		Protein of Unknown Function (DUF239)
FvH4_5g33670	-1.50462	0.000394147	0.046629	down	ZF14	MATE efflux family protein
FvH4_2g09801	-1.35488	0.000427964	0.0486081	down		Aminotransferase-like, plant mobile domain family protein
