# Supplementary material for: Gene Expression Profiling of the Shoot Meristematic Tissues in Woodland Strawberry Fragaria vesca
Source: Front Plant Sci. 2019 Dec 13;10:1624. doi: 10.3389/fpls.2019.01624 (PMC6923813; doi:10.3389/fpls.2019.01624)
Supplement: Supplementary file 3 [file DataSheet_3.xlsx]

## Sheet: All genes in the clusters
Supplementary Data 3. Genes in the k-mean clusters
SHEET 1: All the genes in the nine k-means clusters
SHEET 2: All the transcription factor genes in the nine k-means clusters
SHEET 3: Enriched GO terms in the nine k-means clusters if any
All the genes in the nine k-means clusters
Gene ID	Clusters	SAM_TPM	SFM_TPM	REM_TPM	Symbols	Description
FvH4_1g12770	Cluster 1	4.25518	5.96695	2.22328		S-adenosyl-L-methionine-dependent methyltransferases superfamily protein
FvH4_1g16840	Cluster 1	5.48931	6.23541	1.74005	UGT84B2	UDP-glucosyl transferase 84B2
FvH4_1g18220	Cluster 1	158.429	150.9	88.1802	AtGRF1,GRF1	growth-regulating factor 1
FvH4_2g29320	Cluster 1	1.87448	2.44844	0.537366
FvH4_2g33690	Cluster 1	180.56	173.544	105.477	SLY1	F-box family protein
FvH4_2g35430	Cluster 1	1.00669	1.99172	0.269821
FvH4_3g05530	Cluster 1	104.831	126.227	46.5959	ATGA2OX2,GA2OX2	gibberellin 2-oxidase
FvH4_3g08360	Cluster 1	20.3292	30.7999	13.2136		UDP-Glycosyltransferase superfamily protein
FvH4_3g16250	Cluster 1	333.509	334.929	203.395	ATGSTU19,GST8,GSTU19	glutathione S-transferase TAU 19
FvH4_3g26130	Cluster 1	24.9935	30.456	19.6517	YAB2	Plant-specific transcription factor YABBY family protein
FvH4_3g35960	Cluster 1	18.8511	26.0278	14.8917	ACT11	actin-11
FvH4_4g20180	Cluster 1	5.10942	5.95954	3.50423		Plant invertase/pectin methylesterase inhibitor superfamily protein
FvH4_4g28720	Cluster 1	6.80085	6.93466	1.58589
FvH4_5g30240	Cluster 1	48.7694	43.7969	23.4775
FvH4_5g35460	Cluster 1	8.13118	10.7079	5.90125		basic helix-loop-helix (bHLH) DNA-binding superfamily protein
FvH4_6g07830	Cluster 1	50.2118	57.7531	34.7897	SVB	Protein of unknown function, DUF538
FvH4_6g09540	Cluster 1	1583.41	1710.03	1006.47	UBC28	ubiquitin-conjugating enzyme 28
FvH4_6g23170	Cluster 1	10.1456	12.3248	1.15648	NTT,WIP2	C2H2-type zinc finger family protein
FvH4_6g31850	Cluster 1	2.86882	2.90453	1.22174		Sulfite exporter TauE/SafE family protein
FvH4_6g46750	Cluster 1	6.21372	6.14437	3.8658		HXXXD-type acyl-transferase family protein
FvH4_6g48670	Cluster 1	3.98692	5.17568	2.84199		alpha/beta-Hydrolases superfamily protein
FvH4_6g53240	Cluster 1	7.81765	6.45409	6.56692	ATCLC-B,CLC-B	chloride channel B
FvH4_7g24720	Cluster 1	10.0935	10.7811	2.61607		basic helix-loop-helix (bHLH) DNA-binding superfamily protein
FvH4_1g01600	Cluster 1	4.78709	4.74857	1.76323		NAD(P)-binding Rossmann-fold superfamily protein
FvH4_1g02690	Cluster 1	5.79979	6.19192	2.46937	AtMYB82,MYB82	myb domain protein 82
FvH4_1g03200	Cluster 1	9.12209	12.3289	5.70126	ATSPX1,SPX1	SPX domain gene 1
FvH4_1g06160	Cluster 1	41.4951	42.012	26.5606	ATTIM17-2,TIM17,TIM17-2	translocase inner membrane subunit 17-2
FvH4_1g08850	Cluster 1	29.3959	40.0873	11.3289
FvH4_1g11910	Cluster 1	9.85385	14.4756	1.76838	PGA6,WUS,WUS1	Homeodomain-like superfamily protein
FvH4_1g13510	Cluster 1	20.2319	21.8286	13.1817
FvH4_1g17110	Cluster 1	40.3821	44.387	28.1242		alpha/beta-Hydrolases superfamily protein
FvH4_1g18630	Cluster 1	8.49254	11.7676	1.17087	ATGER3,GER3,GLP3,GLP3A,GLP3B	germin 3
FvH4_1g18670	Cluster 1	10.2354	9.99226	1.65676	HSL2	HAESA-like 2
FvH4_1g18690	Cluster 1	73.4388	93.4261	53.7524	PMDH1	peroxisomal NAD-malate dehydrogenase 1
FvH4_1g19710	Cluster 1	141.868	142.809	8.87967	AGL22,SVP	K-box region and MADS-box transcription factor family protein
FvH4_1g22180	Cluster 1	35.2484	43.5717	24.0809
FvH4_1g23990	Cluster 1	17.2442	25.0306	3.66903	IDL2	inflorescence deficient in abscission (IDA)-like 2
FvH4_2g01681	Cluster 1	14.8802	18.3654	7.21949		Disease resistance-responsive (dirigent-like protein) family protein
FvH4_2g05431	Cluster 1	31.3328	36.0667	22.2158
FvH4_2g07050	Cluster 1	5.04872	6.79651	2.6371	MLP43	MLP-like protein 43
FvH4_2g07082	Cluster 1	4.21798	4.24959	2.5476		2-oxoglutarate (2OG) and Fe(II)-dependent oxygenase superfamily protein
FvH4_2g12940	Cluster 1	43.6312	65.9584	23.1394	KCS1	3-ketoacyl-CoA synthase 1
FvH4_2g14860	Cluster 1	41.6404	59.6931	17.0187		Nodulin MtN3 family protein
FvH4_2g16861	Cluster 1	87.9168	101.643	29.8245		Plant protein 1589 of unknown function
FvH4_2g18090	Cluster 1	19.6894	22.9362	5.49757		Protein of unknown function (DUF506)
FvH4_2g21300	Cluster 1	44.058	40.6536	24.1622		Sugar isomerase (SIS) family protein
FvH4_2g21450	Cluster 1	148.149	162.411	80.2522
FvH4_2g21970	Cluster 1	2.90383	3.1085	0.823145	ASL18,LBD16	lateral organ boundaries-domain 16
FvH4_2g22520	Cluster 1	11.1242	17.0531	7.03295	IAA16	indoleacetic acid-induced protein 16
FvH4_2g22890	Cluster 1	9.46994	12.0218	7.84305
FvH4_2g23871	Cluster 1	6.46727	6.88254	3.02122	DVL8,RTFL7	ROTUNDIFOLIA like 7
FvH4_2g25852	Cluster 1	29.8041	27.0109	7.7927
FvH4_2g25880	Cluster 1	21.635	27.9998	12.9327		Protein of unknown function, DUF538
FvH4_2g26340	Cluster 1	8.74083	11.2322	5.93061		C2H2-like zinc finger protein
FvH4_2g31640	Cluster 1	18.4144	19.8198	5.84834	EDA39	calmodulin-binding family protein
FvH4_2g31700	Cluster 1	36.8095	48.7889	19.8486		Thioredoxin superfamily protein
FvH4_2g35690	Cluster 1	4.84725	7.59837	1.83026		Transducin/WD40 repeat-like superfamily protein
FvH4_2g35860	Cluster 1	64.9931	76.1139	44.8618		ARM repeat superfamily protein
FvH4_2g36680	Cluster 1	19.9804	25.2918	14.0894		Peptidyl-tRNA hydrolase II (PTH2) family protein
FvH4_2g37340	Cluster 1	5.19826	7.86187	3.22395	CYP84A1,FAH1	ferulic acid 5-hydroxylase 1
FvH4_2g38120	Cluster 1	54.0361	77.0415	34.8265		GDSL-like Lipase/Acylhydrolase superfamily protein
FvH4_2g40160	Cluster 1	25.7135	31.5891	19.2092		DNA glycosylase superfamily protein
FvH4_2g41361	Cluster 1	21.4984	25.504	14.2601		Peroxidase superfamily protein
FvH4_3g02030	Cluster 1	24.554	30.9573	13.1554		Protein of unknown function, DUF584
FvH4_3g02670	Cluster 1	3.75788	4.06745	0.310678	ATGA2OX8,GA2OX8	gibberellin 2-oxidase 8
FvH4_3g07370	Cluster 1	21.8951	25.8146	13.5187
FvH4_3g08310	Cluster 1	9.01313	11.1093	6.01122	HB-3,STIP,WOX9	homeobox-3
FvH4_3g08710	Cluster 1	75.6284	72.0953	32.003		Drought-responsive family protein
FvH4_3g08750	Cluster 1	202.845	205.104	122.572	ATERF-4,ATERF4,ERF4,RAP2.5	ethylene responsive element binding factor 4
FvH4_3g09870	Cluster 1	42.1646	59.8793	28.9576	FT	PEBP (phosphatidylethanolamine-binding protein) family protein
FvH4_3g18380	Cluster 1	22.4503	21.7573	6.21019		D-mannose binding lectin protein with Apple-like carbohydrate-binding domain
FvH4_3g21460	Cluster 1	117.835	200.768	32.128	DFL1,GH3.6	Auxin-responsive GH3 family protein
FvH4_3g23370	Cluster 1	17.084	22.7351	8.96851
FvH4_3g26900	Cluster 1	21.6271	28.8985	16.3083		alpha/beta-Hydrolases superfamily protein
FvH4_3g30980	Cluster 1	14.3297	20.0591	10.6887		AMP-dependent synthetase and ligase family protein
FvH4_3g31180	Cluster 1	27.0986	45.2259	14.6745
FvH4_3g32350	Cluster 1	1.80373	2.70392	1.19984		F-box family protein
FvH4_3g34410	Cluster 1	7.76658	7.84484	1.11602	PRS,PRS1,WOX3	Homeodomain-like superfamily protein
FvH4_3g39160	Cluster 1	8.2977	10.9581	2.38036
FvH4_3g40801	Cluster 1	53.8949	49.7357	31.2044
FvH4_3g41390	Cluster 1	35.2427	46.5188	27.0343		Ribonuclease E inhibitor RraA/Dimethylmenaquinone methyltransferase
FvH4_3g44550	Cluster 1	34.8804	43.5186	28.0622		Cation efflux family protein
FvH4_3g44751	Cluster 1	10.4181	13.1606	4.72463		Disease resistance-responsive (dirigent-like protein) family protein
FvH4_3g44752	Cluster 1	42.5819	61.8021	29.4324		Disease resistance-responsive (dirigent-like protein) family protein
FvH4_3g44790	Cluster 1	23.5798	31.0849	16.6223		Disease resistance-responsive (dirigent-like protein) family protein
FvH4_4g02370	Cluster 1	4.67424	8.06801	1.83147
FvH4_4g02520	Cluster 1	4.61083	5.4897	1.14508		Plant protein of unknown function (DUF247)
FvH4_4g02640	Cluster 1	1.99725	2.20131	1.16524		P-loop containing nucleoside triphosphate hydrolases superfamily protein
FvH4_4g08920	Cluster 1	2.23975	2.91401	1.50333		transferases, transferring glycosyl groups
FvH4_4g10250	Cluster 1	1.99269	2.01539	0.625553
FvH4_4g10860	Cluster 1	408.74	476.842	298.886		pfkB-like carbohydrate kinase family protein
FvH4_4g18300	Cluster 1	5695.71	7103.48	3339.29	TCTP	translationally controlled tumor protein
FvH4_4g18540	Cluster 1	11.831	13.5779	8.97584		Protein of unknown function (DUF581)
FvH4_4g18591	Cluster 1	12.5858	19.5489	9.21554		alpha/beta-Hydrolases superfamily protein
FvH4_4g18890	Cluster 1	5.30855	5.39202	1.92208		Chaperone DnaJ-domain superfamily protein
FvH4_4g18990	Cluster 1	66.6773	74.9875	17.9883	MLP423	MLP-like protein 423
FvH4_4g23520	Cluster 1	5.53583	11.3581	2.81113		Squamosa promoter-binding protein-like (SBP domain) transcription factor family protein
FvH4_4g27360	Cluster 1	25.2823	27.499	10.678	CLE43	CLAVATA3/ESR-RELATED 43
FvH4_4g28170	Cluster 1	9.01772	9.78012	0.809272	BRC2,TCP12	TCP domain protein 12
FvH4_4g29400	Cluster 1	3.48441	7.24728	1.09945	BAS1,CYP72B1,CYP734A1	Cytochrome P450 superfamily protein
FvH4_4g30780	Cluster 1	33.0022	30.555	18.6566	VIK	VH1-interacting kinase
FvH4_4g31000	Cluster 1	30.3832	37.2674	9.00687	ATMIXTA,ATMYB16,MYB16	myb domain protein 16
FvH4_4g31190	Cluster 1	30.9354	30.9283	15.3884	AtMYB117,LOF1,MYB117	myb domain protein 117
FvH4_4g32970	Cluster 1	3.40075	5.52199	0.506586		Kelch repeat-containing F-box family protein
FvH4_4g33960	Cluster 1	61.3222	73.9438	35.2873		Plant invertase/pectin methylesterase inhibitor superfamily protein
FvH4_4g34890	Cluster 1	232.937	239.337	115.127	MLP423	MLP-like protein 423
FvH4_4g35560	Cluster 1	18.2835	19.7497	11.6193	ATGSTU18,GST29,GSTU18	glutathione S-transferase TAU 18
FvH4_4g35920	Cluster 1	60.8748	60.8603	25.6636
FvH4_5g00320	Cluster 1	229.041	213.894	96.0174	AFO,FIL,YAB1	Plant-specific transcription factor YABBY family protein
FvH4_5g00370	Cluster 1	5.35749	7.93543	2.53824	BETA-VPE,BETAVPE	beta vacuolar processing enzyme
FvH4_5g00500	Cluster 1	5.39298	7.89699	2.34454	CYP706A4	cytochrome P450, family 706, subfamily A, polypeptide 4
FvH4_5g02150	Cluster 1	2.67866	4.15001	0.218724	PRS,PRS1,WOX3	Homeodomain-like superfamily protein
FvH4_5g04150	Cluster 1	3.35876	5.61484	1.01987
FvH4_5g04860	Cluster 1	8.99245	11.5934	5.90193		Protein with RING/U-box and TRAF-like domains
FvH4_5g06392	Cluster 1	2.88423	4.15399	1.76645	ATNRT3.1,NRT3.1,WR3	nitrate transmembrane transporters
FvH4_5g10700	Cluster 1	50.7315	60.4407	38.8817		Glutaredoxin family protein
FvH4_5g10710	Cluster 1	38.2013	45.6963	23.0349	IQD18	IQ-domain 18
FvH4_5g11950	Cluster 1	2.62508	2.78874	0.321706	BEE3	BR enhanced expression 3
FvH4_5g12520	Cluster 1	72.0706	91.7176	34.1419		Eukaryotic aspartyl protease family protein
FvH4_5g12570	Cluster 1	6.68571	6.89785	5.43102	CYP94D2	cytochrome P450, family 94, subfamily D, polypeptide 2
FvH4_5g12760	Cluster 1	56.9378	110.057	19.7222
FvH4_5g12761	Cluster 1	6.71482	7.45115	3.31526
FvH4_5g13131	Cluster 1	9.2352	9.34213	2.99535
FvH4_5g16741	Cluster 1	6.94019	13.5487	2.09954
FvH4_5g17270	Cluster 1	3.72267	5.97867	2.15889	WOX1	WUSCHEL related homeobox 1
FvH4_5g19570	Cluster 1	59.0044	78.3193	49.1106	ATHB-2,ATHB2,HAT4,HB-2	homeobox protein 2
FvH4_5g19800	Cluster 1	18.2728	18.4378	8.10243	ATERF-5,ATERF5,ERF5	ethylene responsive element binding factor 5
FvH4_5g30890	Cluster 1	12.674	18.7795	4.6857		Chloroplast-targeted copper chaperone protein
FvH4_5g32320	Cluster 1	15.2817	17.6127	8.30198	ATMYB3,MYB3	myb domain protein 3
FvH4_5g33670	Cluster 1	1.78395	3.56462	0.408866	ZF14	MATE efflux family protein
FvH4_5g38280	Cluster 1	28.9687	45.7148	20.1622	ATGPAT3,GPAT3	glycerol-3-phosphate acyltransferase 3
FvH4_6g00460	Cluster 1	79.1287	97.2399	61.4916
FvH4_6g01370	Cluster 1	11.5887	14.1939	5.27887		GDSL-like Lipase/Acylhydrolase superfamily protein
FvH4_6g02460	Cluster 1	411.938	561.064	302.673	AN3,ATGIF1,GIF,GIF1	SSXT family protein
FvH4_6g06041	Cluster 1	3.91706	6.7253	2.07994
FvH4_6g07820	Cluster 1	373.918	483.052	237.649	SVB	Protein of unknown function, DUF538
FvH4_6g07950	Cluster 1	71.7329	67.1047	38.0003
FvH4_6g08070	Cluster 1	4.87045	6.05258	3.66842		GDSL-like Lipase/Acylhydrolase superfamily protein
FvH4_6g08190	Cluster 1	164.688	318.625	20.6697	ATRL6,RL6,RSM3	RAD-like 6
FvH4_6g08620	Cluster 1	3.52617	5.63596	1.27552	ATMYB61,MYB61	myb domain protein 61
FvH4_6g08740	Cluster 1	69.007	68.4099	43.6983	GLP5	germin-like protein 5
FvH4_6g08790	Cluster 1	13.2695	17.5733	7.70704
FvH4_6g09960	Cluster 1	2308.48	2837.62	1583.45	LTP4	lipid transfer protein 4
FvH4_6g10320	Cluster 1	7.58259	7.95056	2.71869		Nuclear transport factor 2 (NTF2) family protein
FvH4_6g11070	Cluster 1	22.0201	25.1384	5.17933	APTX	APRATAXIN-like
FvH4_6g11790	Cluster 1	4.32051	4.70267	2.37466		Plant protein of unknown function (DUF247)
FvH4_6g12301	Cluster 1	2.74426	3.6032	1.53787
FvH4_6g14000	Cluster 1	9.7416	13.3802	6.61977	ATDOF2.4,DOF2.4	DNA binding with one finger 2.4
FvH4_6g14451	Cluster 1	9.59386	13.3635	6.4085
FvH4_6g15770	Cluster 1	3.18193	3.87255	1.84903	ATCRR1,CCR1	CRINKLY4 related 1
FvH4_6g18130	Cluster 1	111.894	124.163	75.8989	AtGRF4,GRF4	growth-regulating factor 4
FvH4_6g20103	Cluster 1	2.29886	2.60837	0.505964
FvH4_6g22050	Cluster 1	56.3263	51.5583	27.1625	HAT14	homeobox from Arabidopsis thaliana
FvH4_6g24890	Cluster 1	2.14868	3.64933	0.826463
FvH4_6g25090	Cluster 1	38.8614	57.7677	13.6608	BOP2	Ankyrin repeat family protein / BTB/POZ domain-containing protein
FvH4_6g30250	Cluster 1	12.4403	17.6488	8.77938		Galactose oxidase/kelch repeat superfamily protein
FvH4_6g31950	Cluster 1	1.66251	2.57082	0.669138		Transducin/WD40 repeat-like superfamily protein
FvH4_6g33440	Cluster 1	9.404	9.51557	5.50859		Late embryogenesis abundant (LEA) hydroxyproline-rich glycoprotein family
FvH4_6g35730	Cluster 1	5.4443	8.59912	2.23108	SEC15B	exocyst complex component sec15B
FvH4_6g38660	Cluster 1	3.08175	5.48067	1.16423		GDSL-like Lipase/Acylhydrolase superfamily protein
FvH4_6g39240	Cluster 1	4.54156	5.94616	2.29426		Leucine-rich repeat (LRR) family protein
FvH4_6g39311	Cluster 1	3.66337	3.64244	2.54281		UDP-Glycosyltransferase superfamily protein
FvH4_6g39813	Cluster 1	9.88701	11.2061	3.59078	ATUGT85A1,UGT85A1	UDP-Glycosyltransferase superfamily protein
FvH4_6g40170	Cluster 1	1.99675	3.05593	0.819897	UNE16	Homeodomain-like superfamily protein
FvH4_6g40610	Cluster 1	14.9295	14.9221	9.16661
FvH4_6g41660	Cluster 1	90.4694	78.8895	3.78625		Glycine-rich protein family
FvH4_6g45391	Cluster 1	101.361	130.679	76.8865	DVL3,RTFL21	ROTUNDIFOLIA like 21
FvH4_6g46330	Cluster 1	11.1582	11.7633	6.80741		Pollen Ole e 1 allergen and extensin family protein
FvH4_6g47010	Cluster 1	20.2203	25.0387	14.3923
FvH4_6g48960	Cluster 1	107.147	154.367	72.2372	ABCB19,ATABCB19,ATMDR1,ATMDR11,ATPGP19,MDR1,MDR11,PGP19	ATP binding cassette subfamily B19
FvH4_6g48970	Cluster 1	4.92929	6.95091	2.27697		basic helix-loop-helix (bHLH) DNA-binding family protein
FvH4_6g49081	Cluster 1	23.2783	25.2683	12.4641		Galactose mutarotase-like superfamily protein
FvH4_6g51230	Cluster 1	76.9413	70.0424	42.4192
FvH4_6g53190	Cluster 1	37.5928	46.7322	20.4561
FvH4_6g53560	Cluster 1	84.8188	101.409	64.2521	ATTSO2,TSO2	Ferritin/ribonucleotide reductase-like family protein
FvH4_7g01511	Cluster 1	9.59246	13.9938	4.97653		NAD(P)-binding Rossmann-fold superfamily protein
FvH4_7g05620	Cluster 1	7.06558	9.4504	3.04992
FvH4_7g05970	Cluster 1	4.53349	5.68727	0.184663	PTL	Duplicated homeodomain-like superfamily protein
FvH4_7g10680	Cluster 1	48.7913	52.5955	32.8624	SPL11	squamosa promoter-like 11
FvH4_7g11780	Cluster 1	6.86808	6.68521	2.93304	BEN1	NAD(P)-binding Rossmann-fold superfamily protein
FvH4_7g11990	Cluster 1	3.55731	6.15316	1.0621	JLO,LBD30	Lateral organ boundaries (LOB) domain family protein
FvH4_7g15020	Cluster 1	21.2676	32.8645	2.38428		UDP-Glycosyltransferase superfamily protein
FvH4_7g15780	Cluster 1	1.79215	2.07606	0.22172		2-oxoglutarate (2OG) and Fe(II)-dependent oxygenase superfamily protein
FvH4_7g20260	Cluster 1	22.0345	29.9731	13.1146		RNA-binding (RRM/RBD/RNP motifs) family protein
FvH4_7g20800	Cluster 1	2.0392	2.73602	1.47447		ABC-2 type transporter family protein
FvH4_7g25860	Cluster 1	5.82575	6.23262	1.56683	ATEXP8,ATEXPA8,ATHEXP,ALPHA,1.11,EXP8,EXPA8	expansin A8
FvH4_7g26340	Cluster 1	15.2325	25.5136	2.79338	CYP714A1	cytochrome P450, family 714, subfamily A, polypeptide 1
FvH4_7g26670	Cluster 1	8.21206	5.76883	6.56204		Ankyrin repeat family protein
FvH4_7g27970	Cluster 1	224.094	243.242	94.0577	EXL3	EXORDIUM like 3
FvH4_7g30072	Cluster 1	3.06929	3.37701	1.58263		MATE efflux family protein
FvH4_7g30930	Cluster 1	5.60615	7.04411	2.36822	CRF4	cytokinin response factor 4
FvH4_7g33100	Cluster 1	7.01054	8.44491	3.78963		nodulin MtN21 /EamA-like transporter family protein
FvH4_c3g00070	Cluster 1	1094.22	1645.91	456.762
FvH4_1g07560	Cluster 1	34.0844	51.5085	25.6971
FvH4_1g16090	Cluster 1	5.50573	10.0546	2.03848		Remorin family protein
FvH4_1g20110	Cluster 1	2.24017	3.77159	1.66194	ATL6	RING/U-box superfamily protein
FvH4_1g20400	Cluster 1	5.96776	9.25294	4.42591	ABCG11,ATWBC11,COF1,DSO,WBC11	white-brown complex homolog protein 11
FvH4_2g06670	Cluster 1	4.4182	8.08156	1.95314		Protein of unknown function (DUF1645)
FvH4_2g14570	Cluster 1	1.46156	3.09428	0.585045		pathogenesis-related family protein
FvH4_2g17930	Cluster 1	107.749	165.77	77.6528
FvH4_2g35620	Cluster 1	17.4707	34.1856	8.04027	TINY2	Integrase-type DNA-binding superfamily protein
FvH4_3g39860	Cluster 1	3.83694	5.72441	2.83754		RNI-like superfamily protein
FvH4_3g44850	Cluster 1	17.4664	28.5135	11.7017		Bifunctional inhibitor/lipid-transfer protein/seed storage 2S albumin superfamily protein
FvH4_4g27020	Cluster 1	15.4155	21.9463	13.0548		C2H2 and C2HC zinc fingers superfamily protein
FvH4_5g08350	Cluster 1	3.55743	6.7212	2.02877
FvH4_5g16760	Cluster 1	8.07114	18.7463	3.28733
FvH4_5g22471	Cluster 1	0.892759	1.59608	0.45812
FvH4_5g30170	Cluster 1	173.694	320.941	100.476	ARPN	plantacyanin
FvH4_6g17450	Cluster 1	12.9888	34.1896	2.75997	ATHB51,HB51,LMI1	homeobox 51
FvH4_6g22100	Cluster 1	9.74782	13.6944	7.77903
FvH4_7g11980	Cluster 1	6.08371	10.6071	4.46882	LBD31	LOB domain-containing protein 31
FvH4_7g15950	Cluster 1	13.9203	23.5206	9.31581
FvH4_7g28690	Cluster 1	1.79422	5.40771	0.341967	AGL6	AGAMOUS-like 6
FvH4_1g04130	Cluster 1	2.85461	5.98625	1.66696		Homeodomain-like superfamily protein
FvH4_1g01070	Cluster 2	62.9739	185.161	55.3565	ATCIPK6,CIPK6,SIP3,SNRK3.14	SOS3-interacting protein 3
FvH4_1g14370	Cluster 2	23.7334	43.1206	32.9158		CAP (Cysteine-rich secretory proteins, Antigen 5, and Pathogenesis-related 1 protein) superfamily protein
FvH4_1g15510	Cluster 2	4.33831	14.3228	2.13136	ASL1,LBD36	ASYMMETRIC LEAVES 2-like 1
FvH4_1g16370	Cluster 2	4.37276	11.8699	6.24126	DEAR2	DREB and EAR motif protein 2
FvH4_1g17550	Cluster 2	2.58132	4.65939	3.57387	CPR30	F-box and associated interaction domains-containing protein
FvH4_2g00100	Cluster 2	6.09418	26.4318	9.08666		RmlC-like cupins superfamily protein
FvH4_2g03930	Cluster 2	1.80195	8.92425	2.30509		Uncharacterised protein family SERF
FvH4_2g16680	Cluster 2	8.2518	14.1855	8.74789		Protein kinase superfamily protein
FvH4_2g21990	Cluster 2	3.84262	6.93148	4.07477		Nodulin MtN3 family protein
FvH4_2g32340	Cluster 2	4.06937	8.96961	5.99177	ATMYB68,MYB68	myb domain protein 68
FvH4_2g32930	Cluster 2	21.3	44.074	26.0263	FRO1	NADH-ubiquinone oxidoreductase-related
FvH4_2g33130	Cluster 2	1.30438	3.17894	2.16985		Galactose oxidase/kelch repeat superfamily protein
FvH4_2g38340	Cluster 2	70.2006	205.847	103.359		Chaperone DnaJ-domain superfamily protein
FvH4_2g39130	Cluster 2	0.21645	3.97436	1.97915		glyoxal oxidase-related protein
FvH4_3g02690	Cluster 2	2.54229	5.87855	3.61513
FvH4_3g04450	Cluster 2	236.622	520.279	211.29
FvH4_3g08341	Cluster 2	3.05946	5.90052	2.00382		UDP-Glycosyltransferase superfamily protein
FvH4_3g21630	Cluster 2	22.0221	41.566	21.676		zinc finger protein-related
FvH4_3g30010	Cluster 2	4.85725	9.82223	6.6596
FvH4_4g05700	Cluster 2	1.97841	54.7757	4.62167
FvH4_4g19050	Cluster 2	16.6498	39.7326	10.5359	MLP423	MLP-like protein 423
FvH4_4g28250	Cluster 2	11.2541	166.431	35.6933		Leucine-rich repeat (LRR) family protein
FvH4_4g31800	Cluster 2	1.16196	4.21524	2.34898
FvH4_4g35980	Cluster 2	8.04853	14.6553	9.27567		Homeodomain-like superfamily protein
FvH4_4g36040	Cluster 2	5.08914	8.18543	3.82293	AtIDD4,IDD4	indeterminate(ID)-domain 4
FvH4_5g04650	Cluster 2	20.6276	38.3594	22.7593
FvH4_5g10410	Cluster 2	1.17698	9.22885	2.12342	NGA1	AP2/B3-like transcriptional factor family protein
FvH4_5g10750	Cluster 2	6.7587	13.775	8.27087	AtGRF8,GRF8	growth-regulating factor 8
FvH4_5g10860	Cluster 2	4.85531	10.9081	4.57252		glyoxal oxidase-related protein
FvH4_5g17710	Cluster 2	3.11712	108.299	20.9418
FvH4_5g21290	Cluster 2	186.027	364.912	235.259
FvH4_5g25260	Cluster 2	160.456	267.594	204.216	CAT2	catalase 2
FvH4_5g26020	Cluster 2	1.49405	3.86953	2.61696		NAD(P)-binding Rossmann-fold superfamily protein
FvH4_6g08700	Cluster 2	0.181357	9.42755	2.7067
FvH4_6g19871	Cluster 2	10.8098	22.383	10.9141	ATOFP6,OFP6	ovate family protein 6
FvH4_6g22790	Cluster 2	0.740743	2.75808	1.22146	ATPGIP1,PGIP1	polygalacturonase inhibiting protein 1
FvH4_6g36940	Cluster 2	4.57866	10.149	4.65085
FvH4_6g44380	Cluster 2	0.481651	2.25655	1.09887	ATENT3,ENT3,FUR1	Major facilitator superfamily protein
FvH4_6g46410	Cluster 2	22.6002	90.4023	38.7761	AGL8,FUL	AGAMOUS-like 8
FvH4_6g53990	Cluster 2	1.95612	10.5104	4.20603	SRG3	senescence-related gene 3
FvH4_7g00120	Cluster 2	0.886063	3.99758	1.37661		Cysteine/Histidine-rich C1 domain family protein
FvH4_7g11180	Cluster 2	0.498908	3.54782	1.79193		Bifunctional inhibitor/lipid-transfer protein/seed storage 2S albumin superfamily protein
FvH4_7g12500	Cluster 2	12.4414	27.9168	14.808		alpha/beta-Hydrolases superfamily protein
FvH4_7g15350	Cluster 2	4.62798	8.42144	3.80395	AtWRKY22,WRKY22	WRKY family transcription factor
FvH4_7g19610	Cluster 2	52.3107	110.722	67.6019		alpha/beta-Hydrolases superfamily protein
FvH4_7g30000	Cluster 2	220.218	402.575	245.5	DCR,EMB3009,PEL3	HXXXD-type acyl-transferase family protein
FvH4_7g32261	Cluster 2	4.65484	28.2271	9.16182
FvH4_1g00330	Cluster 2	0.967217	2.45356	0.808462		Zinc-binding dehydrogenase family protein
FvH4_1g00500	Cluster 2	10.296	19.9153	14.0031
FvH4_1g01970	Cluster 2	20.3663	37.2406	15.6129
FvH4_1g02121	Cluster 2	3.2294	6.44411	3.16178		2-oxoglutarate (2OG) and Fe(II)-dependent oxygenase superfamily protein
FvH4_1g04750	Cluster 2	3.86052	9.89478	6.33407	ATPLT5,ATPMT5,PMT5	polyol/monosaccharide transporter 5
FvH4_1g05320	Cluster 2	5.70813	82.1615	23.4857		alpha/beta-Hydrolases superfamily protein
FvH4_1g05820	Cluster 2	14.717	29.5607	20.5579	TINY2	Integrase-type DNA-binding superfamily protein
FvH4_1g07230	Cluster 2	13.8742	26.2801	19.921	AT-CDA1,CDA1,DESZ	cytidine deaminase 1
FvH4_1g07390	Cluster 2	0.0480607	11.5513	2.79078	CGA1,GATA22	cytokinin-responsive gata factor 1
FvH4_1g08531	Cluster 2	5.75652	22.3517	7.86145	ATGER3,GER3,GLP3,GLP3A,GLP3B	germin 3
FvH4_1g08541	Cluster 2	0.269728	2.59489	1.06082	ATGER3,GER3,GLP3,GLP3A,GLP3B	germin 3
FvH4_1g08570	Cluster 2	0.503697	2.43682	0.624378	ATGER3,GER3,GLP3,GLP3A,GLP3B	germin 3
FvH4_1g09220	Cluster 2	32.0215	79.9674	39.874		Plant invertase/pectin methylesterase inhibitor superfamily protein
FvH4_1g09610	Cluster 2	9.08514	25.0958	16.4036	ATPME44,PME44	pectin methylesterase 44
FvH4_1g10192	Cluster 2	0.375395	2.47119	0.397099	ATGLR3.5,GLR3.5,GLR6	glutamate receptor 3.5
FvH4_1g10572	Cluster 2	0.120596	2.06848	0.339289	SSL5,YLS2	Calcium-dependent phosphotriesterase superfamily protein
FvH4_1g10910	Cluster 2	7.96081	27.0751	13.5295		SEC14 cytosolic factor family protein / phosphoglyceride transfer family protein
FvH4_1g11491	Cluster 2	14.0502	44.4048	28.1807	APX3	ascorbate peroxidase 3
FvH4_1g11510	Cluster 2	45.4685	87.2946	59.4057
FvH4_1g12330	Cluster 2	6.9499	15.8381	7.2228	ROT3	Cytochrome P450 superfamily protein
FvH4_1g12460	Cluster 2	9.64843	9.01959	8.62629		alpha/beta-Hydrolases superfamily protein
FvH4_1g13200	Cluster 2	0.327924	5.2888	1.17615		alpha/beta-Hydrolases superfamily protein
FvH4_1g14320	Cluster 2	2.20278	5.94846	1.77013	BLH2,SAW1	BEL1-like homeodomain 2
FvH4_1g14980	Cluster 2	0.86608	3.74727	1.04139	sks15	SKU5 similar 15
FvH4_1g16240	Cluster 2	5.48185	9.81967	7.02198		F-box/RNI-like superfamily protein
FvH4_1g16930	Cluster 2	2.21601	6.46637	0.879376	CYP81D8	cytochrome P450, family 81, subfamily D, polypeptide 8
FvH4_1g17370	Cluster 2	2.43534	11.3509	3.01247		GRAS family transcription factor
FvH4_1g17650	Cluster 2	12.8837	29.7171	20.2296		Phototropic-responsive NPH3 family protein
FvH4_1g18251	Cluster 2	1.3406	3.90702	1.56863		Thioredoxin superfamily protein
FvH4_1g18280	Cluster 2	15.9126	30.825	19.0766	AtRLP44,RLP44	receptor like protein 44
FvH4_1g18550	Cluster 2	12.9093	31.5965	18.3698	XTH6	xyloglucan endotransglucosylase/hydrolase 6
FvH4_1g21450	Cluster 2	139.074	316.644	182.031	ATIPS2,ATMIPS2,MIPS2	myo-inositol-1-phosphate synthase 2
FvH4_1g21640	Cluster 2	16.5613	55.6191	11.711		Heavy metal transport/detoxification superfamily protein
FvH4_1g21890	Cluster 2	89.4136	168.387	104.707
FvH4_1g23790	Cluster 2	285.884	463.115	232.988	ATCAD9,CAD9	cinnamyl alcohol dehydrogenase 9
FvH4_1g24450	Cluster 2	2.22252	5.81932	1.81967	PUB25	plant U-box 25
FvH4_1g24950	Cluster 2	8.23597	15.9603	6.11412
FvH4_1g25740	Cluster 2	2.27779	10.8141	4.13256		Leucine-rich repeat protein kinase family protein
FvH4_1g28480	Cluster 2	90.4748	155.839	122.526		HSP20-like chaperones superfamily protein
FvH4_1g28760	Cluster 2	58.6571	107.689	72.8022	HMGA	high mobility group A
FvH4_1g30100	Cluster 2	11.7427	22.5239	11.3721		carbon-sulfur lyases
FvH4_2g00420	Cluster 2	1.20355	4.69334	2.34048
FvH4_2g01740	Cluster 2	8.39018	18.0743	10.0845		Pollen Ole e 1 allergen and extensin family protein
FvH4_2g02912	Cluster 2	0.201146	2.27808	0.825594	ATPRB1,PRB1	basic pathogenesis-related protein 1
FvH4_2g03590	Cluster 2	3.158	11.2544	1.12082
FvH4_2g07080	Cluster 2	2.58227	10.2221	4.12884		2-oxoglutarate (2OG) and Fe(II)-dependent oxygenase superfamily protein
FvH4_2g09720	Cluster 2	15.3891	26.4368	18.5475	AtCXE18,CXE18	carboxyesterase 18
FvH4_2g09840	Cluster 2	0.923669	2.36952	1.04131		MBOAT (membrane bound O-acyl transferase) family protein
FvH4_2g10100	Cluster 2	4.00032	7.91625	3.21039	MCT2	MEI2 C-terminal RRM only like 2
FvH4_2g12510	Cluster 2	5.07058	10.1127	6.53		HXXXD-type acyl-transferase family protein
FvH4_2g14900	Cluster 2	13.3147	25.649	14.9792	ATHM2	Thioredoxin superfamily protein
FvH4_2g16010	Cluster 2	24.1066	47.2647	34.4457	CAO,CPSRP43	chloroplast signal recognition particle component (CAO)
FvH4_2g19680	Cluster 2	954.482	1897.58	1296.67
FvH4_2g23081	Cluster 2	3.41453	6.55163	4.96405		2-oxoglutarate (2OG) and Fe(II)-dependent oxygenase superfamily protein
FvH4_2g23190	Cluster 2	0.132774	15.5244	1.9114	PAP85	cupin family protein
FvH4_2g23300	Cluster 2	1.8021	20.3517	5.08631		Seed maturation protein
FvH4_2g23310	Cluster 2	8.33553	27.0295	12.9085	ATOFP16,OFP16	ovate family protein 16
FvH4_2g23800	Cluster 2	2.34282	4.30283	1.71956		Phenazine biosynthesis PhzC/PhzF protein
FvH4_2g25390	Cluster 2	2.62759	11.5556	2.61379		alpha/beta-Hydrolases superfamily protein
FvH4_2g26410	Cluster 2	5.29779	15.0728	8.88323	LAX3	like AUX1 3
FvH4_2g27080	Cluster 2	52.4767	89.5187	70.0584		Acyl-CoA N-acyltransferases (NAT) superfamily protein
FvH4_2g28300	Cluster 2	4.94182	9.81449	5.29805	KNAT3	KNOTTED1-like homeobox gene 3
FvH4_2g31210	Cluster 2	154.299	288.477	197.118	PSBX	photosystem II subunit X
FvH4_2g31280	Cluster 2	0.2186	1.94488	0.63686	AL3	alfin-like 3
FvH4_2g31820	Cluster 2	1.31658	5.02171	0.899999
FvH4_2g32670	Cluster 2	41.5194	75.3327	53.7694	AtGRF1,GRF1	growth-regulating factor 1
FvH4_2g32830	Cluster 2	4.99905	9.98153	3.88065		Uncharacterised conserved protein UCP031279
FvH4_2g33160	Cluster 2	18.6575	45.4722	31.6835		alpha/beta-Hydrolases superfamily protein
FvH4_2g33260	Cluster 2	1.32551	7.47164	1.80824	LBD39	LOB domain-containing protein 39
FvH4_2g33280	Cluster 2	83.6193	142.079	88.0008		Glycosyl hydrolase family 35 protein
FvH4_2g33471	Cluster 2	1.76772	4.41784	2.86763	CYP81D3	cytochrome P450, family 81, subfamily D, polypeptide 3
FvH4_2g34180	Cluster 2	2.73828	5.86023	2.80171		Ribosomal protein S5 family protein
FvH4_2g34930	Cluster 2	1.82178	6.0247	3.02145		Protein of unknown function, DUF547
FvH4_2g36990	Cluster 2	67.5832	139.896	91.3654	FDH,KCS10	3-ketoacyl-CoA synthase 10
FvH4_2g38560	Cluster 2	10.4319	16.8644	9.81782		C2H2-like zinc finger protein
FvH4_2g38950	Cluster 2	12.9272	44.5338	11.5193	SRS7	SHI-related sequence 7
FvH4_2g39680	Cluster 2	0.712029	1.75392	0.866732		Thioredoxin superfamily protein
FvH4_2g41250	Cluster 2	22.2903	38.6955	22.7554	AtMAPR2,MAPR2	membrane-associated progesterone binding protein 2
FvH4_3g03630	Cluster 2	5.97786	17.1716	2.61935	AGL24	AGAMOUS-like 24
FvH4_3g04100	Cluster 2	12.8404	49.3067	2.51546		Haloacid dehalogenase-like hydrolase (HAD) superfamily protein
FvH4_3g04190	Cluster 2	0.61447	15.9482	7.94219		Ribosomal protein L11 family protein
FvH4_3g04610	Cluster 2	2.25068	11.7939	2.41289	ATCKX5,CKX7	cytokinin oxidase 7
FvH4_3g04630	Cluster 2	0.309162	1.82051	0.54352	anac025,NAC025	NAC domain containing protein 25
FvH4_3g04690	Cluster 2	4.021	9.59777	5.04094
FvH4_3g06200	Cluster 2	1.36569	9.58657	4.12881	ATWRKY28,WRKY28	WRKY DNA-binding protein 28
FvH4_3g06360	Cluster 2	2.53412	36.4767	4.19309	ATHB40,HB-5,HB40	homeobox protein 40
FvH4_3g06513	Cluster 2	3.78005	10.433	2.2753	ATSRG1,SRG1	senescence-related gene 1
FvH4_3g08670	Cluster 2	13.4363	20.6912	12.5309
FvH4_3g08880	Cluster 2	7.16967	34.5216	14.3911	SPL3	squamosa promoter binding protein-like 3
FvH4_3g12790	Cluster 2	10.918	21.1002	14.1107		RING/U-box superfamily protein
FvH4_3g12960	Cluster 2	9.51767	159.32	54.3901	UFO	F-box family protein
FvH4_3g13060	Cluster 2	4.43455	5.55603	5.52961	CAT5	cationic amino acid transporter 5
FvH4_3g13210	Cluster 2	21.8495	45.145	31.3888	ATFKBP13,FKBP13	FK506-binding protein 13
FvH4_3g14600	Cluster 2	0	2.75317	1.67524	LCR74,PDF2.5	Scorpion toxin-like knottin superfamily protein
FvH4_3g15360	Cluster 2	6.36872	13.0423	7.91276
FvH4_3g15390	Cluster 2	14.8267	38.895	21.1047		SAUR-like auxin-responsive protein family
FvH4_3g16010	Cluster 2	86.3397	242.703	141.839
FvH4_3g16730	Cluster 2	23.91	72.7268	12.7764	ATNCED3,NCED3,SIS7,STO1	nine-cis-epoxycarotenoid dioxygenase 3
FvH4_3g17990	Cluster 2	8.56708	18.8972	8.02934	BEH4	BES1/BZR1 homolog 4
FvH4_3g19650	Cluster 2	16.6268	63.6065	12.6097	SPL4	squamosa promoter binding protein-like 4
FvH4_3g19800	Cluster 2	4.99573	9.7689	5.9259		VQ motif-containing protein
FvH4_3g20540	Cluster 2	5.80721	10.249	7.53339		CBS domain-containing protein
FvH4_3g21940	Cluster 2	289.118	481.945	349.835	THI1,THI4,TZ	thiazole biosynthetic enzyme, chloroplast (ARA6) (THI1) (THI4)
FvH4_3g23040	Cluster 2	0.28131	1.96903	0.382836
FvH4_3g23570	Cluster 2	4.47916	7.9464	3.53394	IAMT1	IAA carboxylmethyltransferase 1
FvH4_3g23680	Cluster 2	84.1867	236.087	41.6964
FvH4_3g25370	Cluster 2	231.457	375.347	204.934		Pollen Ole e 1 allergen and extensin family protein
FvH4_3g28040	Cluster 2	14.4781	25.3941	11.1465	ADS3,FAD5,FADB,JB67	fatty acid desaturase 5
FvH4_3g29510	Cluster 2	21.7512	32.953	19.7329	ATSERAT2;2,SAT-1,SAT-A,SAT-M,SAT3,SERAT2;2	serine acetyltransferase 2;2
FvH4_3g30690	Cluster 2	0.672786	2.06673	0.279118		Thioredoxin superfamily protein
FvH4_3g30841	Cluster 2	172.676	277.497	157.793
FvH4_3g32680	Cluster 2	2.02227	7.41785	3.33576	ATFLA11,FLA11	FASCICLIN-like arabinogalactan-protein 11
FvH4_3g33880	Cluster 2	1.54375	3.91492	1.52975	NAXT1	nitrate excretion transporter1
FvH4_3g34320	Cluster 2	3.92473	27.2825	13.1843
FvH4_3g34690	Cluster 2	2.53483	6.974	3.08392	KCS12	3-ketoacyl-CoA synthase 12
FvH4_3g36040	Cluster 2	0	6.78703	1.49362
FvH4_3g37240	Cluster 2	2.95632	6.72404	3.03024	COPT1	copper transporter 1
FvH4_3g38780	Cluster 2	57.3614	107.752	81.0661	FAD8	fatty acid desaturase 8
FvH4_3g41570	Cluster 2	7.45346	15.7966	9.4918	PRA1.G2	prenylated RAB acceptor 1.G2
FvH4_3g41720	Cluster 2	3.77889	7.76442	4.68301		Calcium-binding EF-hand family protein
FvH4_3g43040	Cluster 2	20.6324	57.5579	15.0006	NTT,WIP2	C2H2-type zinc finger family protein
FvH4_3g45501	Cluster 2	9.55549	50.3559	19.4913		Mitochondrial substrate carrier family protein
FvH4_4g00110	Cluster 2	15.3561	21.098	13.1191		splicing factor, putative
FvH4_4g01980	Cluster 2	16.0795	39.1207	18.8363	KCS2	3-ketoacyl-CoA synthase 2
FvH4_4g02430	Cluster 2	24.6227	159.139	10.6523
FvH4_4g03560	Cluster 2	0.606154	3.05557	1.16282	ATPPCK1,PPCK1	phosphoenolpyruvate carboxylase kinase 1
FvH4_4g04120	Cluster 2	15.4341	38.01	19.5861
FvH4_4g04650	Cluster 2	20.7151	34.4331	24.2396		RNA-binding (RRM/RBD/RNP motifs) family protein
FvH4_4g06410	Cluster 2	2.18441	4.20607	1.91131
FvH4_4g07560	Cluster 2	0.220169	4.32154	1.61481
FvH4_4g13000	Cluster 2	2.50212	5.6859	3.03864	IAGLU	indole-3-acetate beta-D-glucosyltransferase
FvH4_4g13360	Cluster 2	4.54839	14.2523	4.36729		HXXXD-type acyl-transferase family protein
FvH4_4g18470	Cluster 2	142.973	394.712	94.4679	ATDI21,DI21	drought-induced 21
FvH4_4g19060	Cluster 2	1.84307	16.0141	2.86129	MLP423	MLP-like protein 423
FvH4_4g19080	Cluster 2	0.105298	4.51615	2.33044	MLP423	MLP-like protein 423
FvH4_4g19120	Cluster 2	1.7589	4.47071	1.01146	MLP423	MLP-like protein 423
FvH4_4g20640	Cluster 2	2.39563	9.23373	5.05942
FvH4_4g21760	Cluster 2	8.12961	11.7189	6.07909
FvH4_4g21970	Cluster 2	0.220687	4.68121	1.23376		PLC-like phosphodiesterases superfamily protein
FvH4_4g22080	Cluster 2	88.5417	123.805	78.6711		Translation protein SH3-like family protein
FvH4_4g24990	Cluster 2	1.8529	7.25177	1.87733	ATKCR2,KCR2	beta-ketoacyl reductase 2
FvH4_4g25700	Cluster 2	2.45249	3.66455	1.57393		RING/U-box superfamily protein
FvH4_4g26071	Cluster 2	1.87589	3.44742	2.20007	CRK2	cysteine-rich RLK (RECEPTOR-like protein kinase) 2
FvH4_4g26362	Cluster 2	1.88246	7.84611	3.44286		MATE efflux family protein
FvH4_4g26830	Cluster 2	1.04956	2.49495	1.09275		Protein kinase superfamily protein
FvH4_4g27420	Cluster 2	42.8877	96.7459	43.8673	CER6,CUT1,G2,KCS6,POP1	3-ketoacyl-CoA synthase 6
FvH4_4g27430	Cluster 2	1.32562	3.48461	1.74223		NAD(P)-binding Rossmann-fold superfamily protein
FvH4_4g29600	Cluster 2	29.7713	341.719	69.0187	AGL7,AP1	K-box region and MADS-box transcription factor family protein
FvH4_4g30650	Cluster 2	1.95938	3.78763	2.58641		Protein of unknown function (DUF1336)
FvH4_4g32250	Cluster 2	0.153817	10.5686	0.384071		Heavy metal transport/detoxification superfamily protein
FvH4_4g32251	Cluster 2	1.25807	5.25228	2.16504		Heavy metal transport/detoxification superfamily protein
FvH4_4g32480	Cluster 2	11.6195	23.835	11.2851	scpl50	serine carboxypeptidase-like 50
FvH4_4g32750	Cluster 2	13.2298	42.9918	9.71725	MLP28	MLP-like protein 28
FvH4_4g33370	Cluster 2	0	9.23745	0.0885108	KNATM	KNOX Arabidopsis thaliana meinox
FvH4_4g33740	Cluster 2	5.61883	10.3329	5.94939		2-oxoglutarate (2OG) and Fe(II)-dependent oxygenase superfamily protein
FvH4_4g34130	Cluster 2	15.4377	29.271	20.1082	DHNS,ECHID	enoyl-CoA hydratase/isomerase D
FvH4_4g35790	Cluster 2	237.342	562.331	168.979	ATUGT85A1,UGT85A1	UDP-Glycosyltransferase superfamily protein
FvH4_5g00180	Cluster 2	17.4802	28.8738	21.6197
FvH4_5g00760	Cluster 2	19.1465	54.5967	28.807
FvH4_5g01170	Cluster 2	1.85676	4.55824	1.29977	ANS,LDOX,TDS4,TT18	leucoanthocyanidin dioxygenase
FvH4_5g01430	Cluster 2	2.04613	4.47194	1.77173
FvH4_5g03960	Cluster 2	3.76438	27.5002	2.71898
FvH4_5g04360	Cluster 2	4.5873	8.97085	5.91013
FvH4_5g04833	Cluster 2	0.358261	10.1355	4.37849		RING/U-box superfamily protein
FvH4_5g05880	Cluster 2	9.08796	39.3464	17.6311	TAR2	tryptophan aminotransferase related 2
FvH4_5g06070	Cluster 2	1.40532	3.02665	1.4214	ATMYB86,MYB86	myb domain protein 86
FvH4_5g09300	Cluster 2	44.4113	89.1271	65.5674	ATICE1,ICE1,SCRM	basic helix-loop-helix (bHLH) DNA-binding superfamily protein
FvH4_5g09640	Cluster 2	3.36153	13.2368	2.74094
FvH4_5g09660	Cluster 2	47.4102	341.729	58.0983	LFY,LFY3	floral meristem identity control protein LEAFY (LFY)
FvH4_5g10640	Cluster 2	2.21652	8.55021	0.711321		GroES-like zinc-binding dehydrogenase family protein
FvH4_5g10770	Cluster 2	2.87826	6.76452	4.62714	BLT	branchless trichome
FvH4_5g14970	Cluster 2	4.80501	12.0089	5.83463	ATMYB94,ATMYBCP70,MYB94	myb domain protein 94
FvH4_5g15000	Cluster 2	0.629227	13.7215	4.30839	ATGSTU9,GST14,GST14B,GSTU9	glutathione S-transferase tau 9
FvH4_5g15121	Cluster 2	8.40682	15.5458	6.93967	ATGSTU10,GSTU10	glutathione S-transferase TAU 10
FvH4_5g15490	Cluster 2	7.2292	21.0508	11.8342	ATHIR1,HIR1	SPFH/Band 7/PHB domain-containing membrane-associated protein family
FvH4_5g19980	Cluster 2	2.42343	9.32814	4.00611	PLA-I{beta]2	alpha/beta-Hydrolases superfamily protein
FvH4_5g20380	Cluster 2	0.56057	3.44706	1.32792	ATCAT6,CAT6	cationic amino acid transporter 6
FvH4_5g22360	Cluster 2	4.16471	23.2136	9.6635	bHLH071	beta HLH protein 71
FvH4_5g24950	Cluster 2	119.381	192.514	116.457		Uncharacterised protein family (UPF0497)
FvH4_5g26660	Cluster 2	391.355	612.837	343.108	SVB	Protein of unknown function, DUF538
FvH4_5g28820	Cluster 2	251.328	434.597	294.194	ATFD2,FED,A	2Fe-2S ferredoxin-like superfamily protein
FvH4_5g32500	Cluster 2	5.16745	9.18742	4.6243		C2 calcium/lipid-binding plant phosphoribosyltransferase family protein
FvH4_5g33530	Cluster 2	4.06545	14.2244	5.32829	AAP6	amino acid permease 6
FvH4_5g36230	Cluster 2	0.0958541	1.93819	0.643144		RING/U-box superfamily protein
FvH4_5g36400	Cluster 2	2.47932	10.9639	5.86361		Cupredoxin superfamily protein
FvH4_5g36850	Cluster 2	7.51344	128.579	54.2107	EXL2	EXORDIUM like 2
FvH4_5g36970	Cluster 2	20.1795	40.9494	19.2319	ATUGT85A1,UGT85A1	UDP-Glycosyltransferase superfamily protein
FvH4_5g37780	Cluster 2	0.279055	3.626	0.800561		Haloacid dehalogenase-like hydrolase (HAD) superfamily protein
FvH4_5g38040	Cluster 2	3.45408	39.3852	3.19706		2-oxoglutarate (2OG) and Fe(II)-dependent oxygenase superfamily protein
FvH4_5g38050	Cluster 2	6.00502	28.923	6.9041		2-oxoglutarate (2OG) and Fe(II)-dependent oxygenase superfamily protein
FvH4_5g38350	Cluster 2	13.9127	48.9381	12.6762
FvH4_6g01040	Cluster 2	47.4752	543.244	230.792
FvH4_6g01380	Cluster 2	59.9024	109.461	83.1499		GDSL-like Lipase/Acylhydrolase superfamily protein
FvH4_6g01390	Cluster 2	8.40773	71.1971	22.7027		GDSL-like Lipase/Acylhydrolase superfamily protein
FvH4_6g02170	Cluster 2	8.60496	19.8704	12.993
FvH4_6g02830	Cluster 2	9.02531	14.4421	8.5863	ATUBC2,UBC2	ubiquiting-conjugating enzyme 2
FvH4_6g05350	Cluster 2	3.55747	7.54317	4.50094		D-aminoacid aminotransferase-like PLP-dependent enzymes superfamily protein
FvH4_6g05450	Cluster 2	11.5526	24.014	16.7745	ATL6	RING/U-box superfamily protein
FvH4_6g06330	Cluster 2	54.7354	175.846	65.8534	ATCKX6,ATCKX7,CKX6	cytokinin oxidase/dehydrogenase 6
FvH4_6g06500	Cluster 2	1.85931	33.027	9.79921		Heavy metal transport/detoxification superfamily protein
FvH4_6g06510	Cluster 2	35.2567	131.523	56.3683	ATRAD9,RAD9	cell cycle checkpoint control protein family
FvH4_6g08191	Cluster 2	3.55484	6.74782	4.19934		Eukaryotic aspartyl protease family protein
FvH4_6g08330	Cluster 2	422.192	1393.71	235.143
FvH4_6g08340	Cluster 2	943.309	2069.19	1354.11
FvH4_6g08370	Cluster 2	0.448227	1.95894	0.956409	AtSAM1,MAT1,SAM-1,SAM1	S-adenosylmethionine synthetase 1
FvH4_6g08720	Cluster 2	8.94832	347.184	81.0703
FvH4_6g08930	Cluster 2	2.7971	15.052	4.49061	ATPPCK1,PPCK1	phosphoenolpyruvate carboxylase kinase 1
FvH4_6g08940	Cluster 2	47.9467	180.641	75.9398		Tetratricopeptide repeat (TPR)-like superfamily protein
FvH4_6g08960	Cluster 2	5.45716	12.6162	8.66917		Tetratricopeptide repeat (TPR)-like superfamily protein
FvH4_6g09321	Cluster 2	0.105455	2.0028	0.595916	CYP714A1	cytochrome P450, family 714, subfamily A, polypeptide 1
FvH4_6g09470	Cluster 2	2.66971	5.26362	3.73423		Leucine-rich repeat protein kinase family protein
FvH4_6g09750	Cluster 2	4.17367	15.8984	7.16925	ATWRKY70,WRKY70	WRKY DNA-binding protein 70
FvH4_6g09940	Cluster 2	2.17384	4.34307	2.37755		RING/U-box superfamily protein
FvH4_6g09970	Cluster 2	45.1572	113.086	64.5523	LTP4	lipid transfer protein 4
FvH4_6g09980	Cluster 2	721.226	1592.68	1089.67	LTP3	lipid transfer protein 3
FvH4_6g11850	Cluster 2	6.23671	16.5401	9.22658	ATGPAT6,GPAT6	glycerol-3-phosphate acyltransferase 6
FvH4_6g11950	Cluster 2	4.39796	14.5068	7.47594		Duplicated homeodomain-like superfamily protein
FvH4_6g12570	Cluster 2	14.4183	67.549	13.3679
FvH4_6g12850	Cluster 2	2.32814	8.61662	3.9037		Protein of unknown function, DUF617
FvH4_6g13360	Cluster 2	5.82046	44.008	19.8107
FvH4_6g13610	Cluster 2	132.686	278.285	146.477	ATEXP4,ATEXPA4,ATHEXP,ALPHA,1.6,EXPA4	expansin A4
FvH4_6g13710	Cluster 2	2775.01	6739.64	3473.6
FvH4_6g13930	Cluster 2	11.9225	19.7726	15.8865		TatD related DNase
FvH4_6g14170	Cluster 2	41.8016	85.8454	53.0604		NAD(P)-binding Rossmann-fold superfamily protein
FvH4_6g14280	Cluster 2	95.1842	416.568	214.8
FvH4_6g14810	Cluster 2	2.77163	5.83541	3.26807
FvH4_6g15180	Cluster 2	38.6296	68.9366	37.7546	RAP2.7,TOE1	related to AP2.7
FvH4_6g15530	Cluster 2	0.303937	1.74249	0.400166
FvH4_6g17760	Cluster 2	64.5246	109.609	82.5896		Thioredoxin superfamily protein
FvH4_6g17930	Cluster 2	9.13728	13.3514	7.96544		D-mannose binding lectin protein with Apple-like carbohydrate-binding domain
FvH4_6g19720	Cluster 2	2.39039	16.702	5.38167		NAD(P)-binding Rossmann-fold superfamily protein
FvH4_6g19870	Cluster 2	15.0258	25.2686	13.9364	ATOFP13,OFP13	ovate family protein 13
FvH4_6g20040	Cluster 2	12.4053	64.7416	31.1842		Putative lysine decarboxylase family protein
FvH4_6g20110	Cluster 2	23.2869	37.4335	23.159
FvH4_6g20170	Cluster 2	2.38443	14.5766	5.85652	NHL1	NDR1/HIN1-like 1
FvH4_6g20350	Cluster 2	4.27257	12.154	7.09681	BLH1,EDA29	BEL1-like homeodomain 1
FvH4_6g21760	Cluster 2	1.74035	10.4632	2.94392	ZFP8	zinc finger protein 8
FvH4_6g22390	Cluster 2	3.92883	8.71436	5.70182		VQ motif-containing protein
FvH4_6g22530	Cluster 2	7.22387	12.7937	5.86521
FvH4_6g22810	Cluster 2	1.17679	2.99534	1.88826	ATPGIP1,PGIP1	polygalacturonase inhibiting protein 1
FvH4_6g28000	Cluster 2	10.7232	20.8841	14.0529
FvH4_6g28280	Cluster 2	0.865754	3.81796	1.49911	4-Oct,AtOCT4	organic cation/carnitine transporter4
FvH4_6g28770	Cluster 2	96.2756	247.355	84.9736	CYP77B1	cytochrome P450, family 77, subfamily B, polypeptide 1
FvH4_6g28790	Cluster 2	17.3892	28.5822	20.9093	NIP6,NIP6;1,NLM7	NOD26-like intrinsic protein 6;1
FvH4_6g29260	Cluster 2	0.989687	3.38273	1.82551		adenylate cyclases
FvH4_6g29280	Cluster 2	1.44543	2.99265	1.9001		Polynucleotidyl transferase, ribonuclease H-like superfamily protein
FvH4_6g31711	Cluster 2	26.7198	51.9107	37.4351		D-isomer specific 2-hydroxyacid dehydrogenase family protein
FvH4_6g31720	Cluster 2	2.61747	10.4496	4.92544		D-isomer specific 2-hydroxyacid dehydrogenase family protein
FvH4_6g31961	Cluster 2	1.59793	2.39185	1.7093		Transducin/WD40 repeat-like superfamily protein
FvH4_6g32640	Cluster 2	25.5713	57.8394	27.8442		GDSL-like Lipase/Acylhydrolase superfamily protein
FvH4_6g33130	Cluster 2	22.7181	40.0526	22.1681	PRA1.F2,PRA7	PRA1 (Prenylated rab acceptor) family protein
FvH4_6g33980	Cluster 2	14.4207	36.8953	12.2837
FvH4_6g34310	Cluster 2	5.17078	12.7777	8.8751		Mitochondrial substrate carrier family protein
FvH4_6g35571	Cluster 2	2.54645	6.68739	1.59098	GLIP1	GDSL lipase 1
FvH4_6g38670	Cluster 2	26.578	48.8244	28.8515	HPD,PDS1	phytoene desaturation 1
FvH4_6g39031	Cluster 2	3.08705	7.02092	2.84281	WAKL1	wall associated kinase-like 1
FvH4_6g39380	Cluster 2	3.86831	16.7349	3.67526	HYR1	UDP-Glycosyltransferase superfamily protein
FvH4_6g40300	Cluster 2	0.39796	12.8609	0.564646	AIR3	Subtilisin-like serine endopeptidase family protein
FvH4_6g40583	Cluster 2	2.47786	14.4771	6.57881		Galactose oxidase/kelch repeat superfamily protein
FvH4_6g41830	Cluster 2	3.26528	14.1508	4.61327
FvH4_6g41874	Cluster 2	3.61952	19.4621	8.04413		GDSL-like Lipase/Acylhydrolase superfamily protein
FvH4_6g42080	Cluster 2	16.1529	31.482	19.0755		Phosphotyrosine protein phosphatases superfamily protein
FvH4_6g42780	Cluster 2	2.11418	7.10108	4.07871	ATCSLB03,ATCSLB3,CSLB03	cellulose synthase-like B3
FvH4_6g42800	Cluster 2	10.1076	27.5412	5.27329	ATCSLB04,ATCSLB4,CSLB04	cellulose synthase-like B4
FvH4_6g42870	Cluster 2	1.42551	4.81935	1.12491	ATWRKY6,WRKY6	WRKY family transcription factor
FvH4_6g43750	Cluster 2	0.916014	4.34608	2.11248		basic helix-loop-helix (bHLH) DNA-binding superfamily protein
FvH4_6g45320	Cluster 2	1.63805	9.33489	2.73274		AWPM-19-like family protein
FvH4_6g45410	Cluster 2	0.861541	2.86904	0.214602	TCP1	TCP family transcription factor
FvH4_6g45800	Cluster 2	85.6487	185.736	73.5092		Late embryogenesis abundant protein (LEA) family protein
FvH4_6g46730	Cluster 2	8.01516	23.3408	2.79015	PTF1,TCP13,TFPD	plastid transcription factor 1
FvH4_6g46920	Cluster 2	14.7795	27.2834	18.5819		alpha/beta-Hydrolases superfamily protein
FvH4_6g48610	Cluster 2	35.4557	62.4358	48.5908	ATHB30,HB30,ZFHD3	homeobox protein 30
FvH4_6g50500	Cluster 2	11.2823	22.7019	16.0006		Potassium transporter family protein
FvH4_6g52800	Cluster 2	7.04415	13.0337	9.05025		Ankyrin repeat family protein
FvH4_6g53700	Cluster 2	10.6135	18.0919	13.703		Major facilitator superfamily protein
FvH4_7g00200	Cluster 2	0.897265	2.79061	1.63447	RLK1	receptor-like protein kinase 1
FvH4_7g00510	Cluster 2	149.652	244.362	176.917		Thioredoxin superfamily protein
FvH4_7g01310	Cluster 2	1.71648	4.53578	0.947474		HXXXD-type acyl-transferase family protein
FvH4_7g01410	Cluster 2	27.2299	55.7868	31.8633		HXXXD-type acyl-transferase family protein
FvH4_7g02730	Cluster 2	0.434137	2.44759	0.583997	ACD1-LIKE,PTC52,TIC55-IV	ACD1-like
FvH4_7g03400	Cluster 2	1.05051	2.00418	0.862586	ATVDAC1,VDAC1	voltage dependent anion channel 1
FvH4_7g03440	Cluster 2	36.3939	56.6302	34.6122	DRP4C	Dynamin related protein 4C
FvH4_7g05951	Cluster 2	0.563405	2.47503	1.28718
FvH4_7g06770	Cluster 2	42.0125	78.6623	59.5849	AHAS,ALS,CSR1,IMR1,TZP5	chlorsulfuron/imidazolinone resistant 1
FvH4_7g10740	Cluster 2	35.0943	122.787	44.8193	GATA4	GATA transcription factor 4
FvH4_7g11260	Cluster 2	41.0512	237.766	121.797	AFO,FIL,YAB1	Plant-specific transcription factor YABBY family protein
FvH4_7g12810	Cluster 2	8.10683	14.302	9.27126		TCP family transcription factor
FvH4_7g13150	Cluster 2	3.7989	9.31814	3.63579	ATXTH27,EXGT-A3,XTH27	endoxyloglucan transferase A3
FvH4_7g13350	Cluster 2	31.8702	64.5851	44.935	AHDP,ANL2	Homeobox-leucine zipper family protein / lipid-binding START domain-containing protein
FvH4_7g14440	Cluster 2	35.4833	81.8544	45.3644	AtGPAT8,GPAT8	glycerol-3-phosphate acyltransferase 8
FvH4_7g15500	Cluster 2	15.9565	29.0361	20.6371		RING/U-box superfamily protein
FvH4_7g15730	Cluster 2	11.9133	23.571	18.005	HS,HWS	Galactose oxidase/kelch repeat superfamily protein
FvH4_7g16111	Cluster 2	0.098812	1.88767	0.487766		NAD(P)-binding Rossmann-fold superfamily protein
FvH4_7g16760	Cluster 2	3.79858	19.2274	6.41882		AP2/B3-like transcriptional factor family protein
FvH4_7g17340	Cluster 2	2.07285	13.2836	3.69562		SAUR-like auxin-responsive protein family
FvH4_7g19720	Cluster 2	1.41409	6.16217	1.58148		Protein kinase superfamily protein
FvH4_7g20050	Cluster 2	687.446	1155.24	918.83		GTP binding Elongation factor Tu family protein
FvH4_7g21300	Cluster 2	2.54857	34.7459	6.6621		Protein of unknown function (DUF674)
FvH4_7g23661	Cluster 2	1.90483	5.16846	2.87964		UDP-Glycosyltransferase superfamily protein
FvH4_7g23871	Cluster 2	2.93015	7.48407	2.17629
FvH4_7g24060	Cluster 2	0	1.942	1.20347		HXXXD-type acyl-transferase family protein
FvH4_7g24410	Cluster 2	28.5162	47.2304	22.8109		SGNH hydrolase-type esterase superfamily protein
FvH4_7g25240	Cluster 2	8.91177	16.5787	8.85204
FvH4_7g25590	Cluster 2	0.768978	2.98161	1.26548
FvH4_7g25660	Cluster 2	1.3406	3.18107	0.72625	ATAZG1,AZG1	AZA-guanine resistant1
FvH4_7g26240	Cluster 2	64.1614	127.814	80.4328	RPL10B	Ribosomal protein L16p/L10e family protein
FvH4_7g26540	Cluster 2	16.3371	31.0029	23.0902	GDH2	glutamate dehydrogenase 2
FvH4_7g26920	Cluster 2	0.66211	4.13614	1.13108	ATERF-1,ERF-1	ethylene responsive element binding factor 1
FvH4_7g26940	Cluster 2	51.611	126.728	73.7641		Integrase-type DNA-binding superfamily protein
FvH4_7g27470	Cluster 2	1.01526	5.03205	2.26436	PEX11B	peroxin 11B
FvH4_7g29240	Cluster 2	0.714531	4.40871	0.916678		Sugar isomerase (SIS) family protein
FvH4_7g29520	Cluster 2	19.2518	45.1949	28.4929		Heavy metal transport/detoxification superfamily protein
FvH4_7g33550	Cluster 2	8.77174	14.9468	9.2779	ENH1	rubredoxin family protein
FvH4_7g34200	Cluster 2	5.00657	17.6752	5.90446		GroES-like zinc-binding dehydrogenase family protein
FvH4_6g06380	Cluster 2	21.1038	51.2303	10.2347	ATRL1,RL1,RSM2	RAD-like 1
FvH4_6g22640	Cluster 2	89.1407	141.705	71.0255	SPL9	squamosa promoter binding protein-like 9
FvH4_7g20910	Cluster 2	2.42588	5.78487	1.19354	KCS19	3-ketoacyl-CoA synthase 19
FvH4_3g09050	Cluster 2	5.1385	11.9432	2.6734		basic helix-loop-helix (bHLH) DNA-binding superfamily protein
FvH4_4g33340	Cluster 2	10.8428	17.7412	8.52371	ATVIT1,VIT1	vacuolar iron transporter 1
FvH4_5g08330	Cluster 2	19.2095	27.0818	16.4354		HCP-like superfamily protein with MYND-type zinc finger
FvH4_2g16500	Cluster 3	14.8025	7.5556	3.50353	CYP87A2	cytochrome P450, family 87, subfamily A, polypeptide 2
FvH4_2g32400	Cluster 3	78.4313	48.8783	40.6578	BP,BP1,KNAT1	KNOTTED-like from Arabidopsis thaliana
FvH4_3g15720	Cluster 3	3.71341	2.1798	1.40395		disease resistance protein (TIR-NBS-LRR class), putative
FvH4_3g34910	Cluster 3	7.52012	5.15977	3.79073		Protein of unknown function (DUF1635)
FvH4_3g38760	Cluster 3	5.12135	2.69627	2.07604
FvH4_4g07780	Cluster 3	19.365	8.90923	5.15407
FvH4_4g29640	Cluster 3	21.1247	13.3747	7.72838		Squamosa promoter-binding protein-like (SBP domain) transcription factor family protein
FvH4_5g07700	Cluster 3	12.6101	5.43106	2.78143
FvH4_6g05440	Cluster 3	94.0861	55.3725	26.1147		basic helix-loop-helix (bHLH) DNA-binding superfamily protein
FvH4_6g05970	Cluster 3	93.854	53.5796	36.3992	ATCKX5,CKX7	cytokinin oxidase 7
FvH4_6g17130	Cluster 3	30.4792	15.7452	12.5527		O-methyltransferase family protein
FvH4_6g29850	Cluster 3	50.199	32.3191	25.6175		Tetratricopeptide repeat (TPR)-like superfamily protein
FvH4_6g42440	Cluster 3	5.16441	2.03453	0.726847	AtGH9B8,GH9B8	glycosyl hydrolase 9B8
FvH4_6g45620	Cluster 3	23.2403	15.2224	9.03305	TBL21	TRICHOME BIREFRINGENCE-LIKE 21
FvH4_6g50600	Cluster 3	44.4806	15.4492	5.46429		Protein kinase superfamily protein
FvH4_7g03340	Cluster 3	314.343	198.046	154.319		Eukaryotic aspartyl protease family protein
FvH4_7g14900	Cluster 3	86.192	35.3496	18.1114	BRH1	brassinosteroid-responsive RING-H2
FvH4_1g19111	Cluster 3	3.06111	0.968194	0.185701
FvH4_1g24160	Cluster 3	162.941	85.0217	63.5821	ATC/VIF2,C/VIF2	cell wall / vacuolar inhibitor of fructosidase 2
FvH4_2g03430	Cluster 3	7.49846	3.85706	2.23819		Protein kinase superfamily protein
FvH4_2g18810	Cluster 3	22.3883	11.0284	4.79771		RING/U-box superfamily protein
FvH4_2g22170	Cluster 3	9.13736	5.17473	3.65954	CYP94B1	cytochrome P450, family 94, subfamily B, polypeptide 1
FvH4_2g23750	Cluster 3	489.073	306.38	248.457	ATOEP7,OEP7	outer envelope membrane protein 7
FvH4_2g24720	Cluster 3	24.9503	15.6208	14.0987		NAD(P)-binding Rossmann-fold superfamily protein
FvH4_2g27240	Cluster 3	55.3352	33.6918	21.7247
FvH4_2g28560	Cluster 3	4.54417	2.66989	1.22567
FvH4_2g29540	Cluster 3	80.0631	48.8567	36.5806		Ran BP2/NZF zinc finger-like superfamily protein
FvH4_2g35762	Cluster 3	2.2196	0	0.24887		Phosphorylase superfamily protein
FvH4_2g36870	Cluster 3	19.9805	9.10451	6.20178		Peroxidase family protein
FvH4_2g37141	Cluster 3	7.51428	4.78781	3.49948
FvH4_2g37760	Cluster 3	31.5114	17.1178	11.1957		Zinc-binding alcohol dehydrogenase family protein
FvH4_2g39020	Cluster 3	3.0369	1.92936	1.34517		Protein of unknown function (DUF726)
FvH4_2g40100	Cluster 3	164.446	103.316	86.1695		PPPDE putative thiol peptidase family protein
FvH4_3g01000	Cluster 3	7.6617	4.39014	2.89494	ASAT1,ATASAT1,ATSAT1	acyl-CoA sterol acyl transferase 1
FvH4_3g02090	Cluster 3	3668.39	1841.02	828.542	PRXR1	Peroxidase superfamily protein
FvH4_3g02140	Cluster 3	170.06	92.3104	61.9661		Protein of unknown function, DUF584
FvH4_3g03640	Cluster 3	38.3204	18.4275	13.1503		B-box type zinc finger family protein
FvH4_3g06840	Cluster 3	6.75015	3.50586	1.42452		Leucine-rich repeat transmembrane protein kinase
FvH4_3g07043	Cluster 3	10.3144	5.05513	3.43509
FvH4_3g07380	Cluster 3	53.4789	23.4796	14.5387
FvH4_3g07720	Cluster 3	2.87292	0.962076	0.434902	PYL11,RCAR5	PYR1-like 11
FvH4_3g17450	Cluster 3	7.0953	3.30119	0.818203	CYP71A25	cytochrome P450, family 71, subfamily A, polypeptide 25
FvH4_3g18371	Cluster 3	7.33315	3.49825	1.21161		D-mannose binding lectin protein with Apple-like carbohydrate-binding domain
FvH4_3g19270	Cluster 3	3.05651	1.5076	0.958905	ATHB52,HB52	homeobox protein 52
FvH4_3g19950	Cluster 3	6.92177	4.5583	3.43662
FvH4_3g22640	Cluster 3	12.6283	5.77364	3.99222
FvH4_3g29400	Cluster 3	2.67654	1.27459	0.542019	ATKCO1,ATTPK1,KCO1,TPK1	Outward rectifying potassium channel protein
FvH4_3g35350	Cluster 3	336.265	210.924	168.908	ADF1,atadf,ATADF1	actin depolymerizing factor 1
FvH4_3g41180	Cluster 3	7.87485	4.07168	2.85984	ATRSP31,RSP31	RNA-binding (RRM/RBD/RNP motifs) family protein
FvH4_3g44990	Cluster 3	9.37336	7.38412	6.2437		Protein of unknown function, DUF538
FvH4_4g00363	Cluster 3	21.3195	12.6804	8.94826	AtPP2-B12,PP2-B12	phloem protein 2-B12
FvH4_4g16260	Cluster 3	7.23225	3.26835	0.735191		Protein of unknown function (DUF1677)
FvH4_4g18960	Cluster 3	25.3229	14.4175	10.6807	MLP423	MLP-like protein 423
FvH4_4g19550	Cluster 3	37.5855	19.2919	13.0923		Haem oxygenase-like, multi-helical
FvH4_4g20060	Cluster 3	7.03149	4.20813	3.25289
FvH4_4g21360	Cluster 3	2.93407	1.67335	0.659771	ABCG37,ATPDR9,PDR9,PIS1	pleiotropic drug resistance 9
FvH4_4g22090	Cluster 3	380.148	198.361	87.0245	EXGT-A1,EXT,XTH4	xyloglucan endotransglucosylase/hydrolase 4
FvH4_4g22140	Cluster 3	51.4176	28.5915	21.5553
FvH4_4g27520	Cluster 3	11.0118	6.3443	3.03739	NIMIN-2	NIM1-interacting 2
FvH4_4g30030	Cluster 3	6.06827	2.82131	1.28042		Putative membrane lipoprotein
FvH4_4g30640	Cluster 3	4.00058	2.2816	1.45659	WRKY3	WRKY DNA-binding protein 3
FvH4_4g34740	Cluster 3	6.50906	3.52887	1.47994
FvH4_5g02630	Cluster 3	676.628	386.273	190.597	PIP1;4,PIP1E,TMP-C	plasma membrane intrinsic protein 1;4
FvH4_5g03430	Cluster 3	41.0557	20.8288	15.0694		Late embryogenesis abundant (LEA) hydroxyproline-rich glycoprotein family
FvH4_5g04940	Cluster 3	134.73	55.5712	23.5221	KELP	transcriptional coactivator p15 (PC4) family protein (KELP)
FvH4_5g05180	Cluster 3	7.77713	2.51268	0.802207		basic helix-loop-helix (bHLH) DNA-binding superfamily protein
FvH4_5g05700	Cluster 3	2.91629	1.89929	0.935975		Tetratricopeptide repeat (TPR)-like superfamily protein
FvH4_5g07710	Cluster 3	11.1028	3.96861	1.4175	MLS	malate synthase
FvH4_5g09600	Cluster 3	14.036	9.18186	7.26376	ORTH2,VIM1	Zinc finger (C3HC4-type RING finger) family protein
FvH4_5g10090	Cluster 3	5.53175	2.33952	0.967625		Protein kinase superfamily protein
FvH4_5g10970	Cluster 3	6.62423	4.15678	2.76864	ATYSL1,YSL1	YELLOW STRIPE like 1
FvH4_5g11640	Cluster 3	8.42549	4.55912	3.7087	ABIL2	ABL interactor-like protein 2
FvH4_5g13760	Cluster 3	21.3677	8.37286	1.97526	AFP3	ABI five binding protein 3
FvH4_5g15460	Cluster 3	6.80631	4.25919	3.1708	QKY	C2 calcium/lipid-binding plant phosphoribosyltransferase family protein
FvH4_5g20840	Cluster 3	138.337	89.9578	64.0974		Protein of unknown function (DUF581)
FvH4_5g26180	Cluster 3	21.7642	14.086	9.48249	HMG1,HMGR1	hydroxy methylglutaryl CoA reductase 1
FvH4_5g27820	Cluster 3	5.95208	1.68602	0.600742		Major facilitator superfamily protein
FvH4_5g29991	Cluster 3	4.7229	2.22318	1.31945	CRK8	cysteine-rich RLK (RECEPTOR-like protein kinase) 8
FvH4_5g31690	Cluster 3	2.07541	0	0.0337588		S-locus lectin protein kinase family protein
FvH4_5g31910	Cluster 3	23.8525	11.5068	6.89519		basic helix-loop-helix (bHLH) DNA-binding superfamily protein
FvH4_5g37970	Cluster 3	77.0546	49.9527	23.8138		Protein of unknown function (DUF581)
FvH4_6g01720	Cluster 3	40.2841	23.6586	16.8129
FvH4_6g02070	Cluster 3	2.65255	1.57054	0.785756		Galactose oxidase/kelch repeat superfamily protein
FvH4_6g02090	Cluster 3	161.274	65.1221	36.6118	ATPPCK1,PPCK1	phosphoenolpyruvate carboxylase kinase 1
FvH4_6g03470	Cluster 3	20.2361	11.7009	9.74816	ATWNK1,WNK1,ZIK4	with no lysine (K) kinase 1
FvH4_6g03980	Cluster 3	29.8228	12.9657	5.43793
FvH4_6g07140	Cluster 3	61.2456	41.7065	27.7182		Chaperone DnaJ-domain superfamily protein
FvH4_6g11920	Cluster 3	48.3064	29.6699	19.6801
FvH4_6g14630	Cluster 3	27.613	15.3472	6.66455		Chloroplast-targeted copper chaperone protein
FvH4_6g14970	Cluster 3	100.011	62.4015	52.9285	GSTL3	Glutathione S-transferase family protein
FvH4_6g16480	Cluster 3	8.60162	5.95302	3.58617	ATMYB68,MYB68	myb domain protein 68
FvH4_6g18220	Cluster 3	82.8861	52.0654	35.0623		IQ calmodulin-binding motif family protein
FvH4_6g20500	Cluster 3	4.35553	1.90509	0.568219
FvH4_6g25410	Cluster 3	43.1423	21.006	7.51338		VQ motif-containing protein
FvH4_6g26930	Cluster 3	35.688	21.0555	15.4756	ARAC5,ATGP3,ATROP4,ROP4	RAC-like GTP binding protein 5
FvH4_6g32560	Cluster 3	5.37555	3.69806	2.54205		HAD superfamily, subfamily IIIB acid phosphatase
FvH4_6g34670	Cluster 3	20.1852	12.9295	6.57206	ATGL1,ATMYB0,GL1,MYB0	myb domain protein 0
FvH4_6g35410	Cluster 3	23.5931	12.4305	6.49785		SAUR-like auxin-responsive protein family
FvH4_6g35550	Cluster 3	8.55128	4.63363	2.06538	GLIP4	GDSL-motif lipase 4
FvH4_6g36050	Cluster 3	57.6026	36.1126	30.3506	ATCYSA,CYSA,FL3-27	cystatin A
FvH4_6g40310	Cluster 3	18.9668	10.4138	3.32024	CLM,CYP90B1,DWF4,PSC1,SAV1,SNP2	Cytochrome P450 superfamily protein
FvH4_6g41240	Cluster 3	12.5606	8.30853	5.37998		Protein kinase superfamily protein
FvH4_6g42570	Cluster 3	231.559	126.361	96.6974	BUM,BUM1,SHL,STM,WAM,WAM1	KNOX/ELK homeobox transcription factor
FvH4_6g43740	Cluster 3	13.0706	7.2539	4.36652		Protein of unknown function (DUF1218)
FvH4_6g48590	Cluster 3	4284.5	2651.3	1290.85	GASA4	GAST1 protein homolog 4
FvH4_6g50310	Cluster 3	4.84511	3.11713	1.47151		Disease resistance protein (CC-NBS-LRR class) family
FvH4_6g51750	Cluster 3	22.5331	13.9653	12.3362
FvH4_6g53900	Cluster 3	69.7447	34.9833	22.7565	ROXY1	Thioredoxin superfamily protein
FvH4_7g00670	Cluster 3	7.25747	4.22011	3.33958		basic helix-loop-helix (bHLH) DNA-binding superfamily protein
FvH4_7g02631	Cluster 3	5.68982	2.70597	2.11102	CPL4	C-terminal domain phosphatase-like 4
FvH4_7g02720	Cluster 3	44.1908	23.3769	16.0257	ACD1-LIKE,PTC52,TIC55-IV	ACD1-like
FvH4_7g02731	Cluster 3	10.2742	4.97883	1.76574	ACD1-LIKE,PTC52,TIC55-IV	ACD1-like
FvH4_7g09580	Cluster 3	36.0204	21.5438	16.7858	ATJ2,J2	DNAJ homologue 2
FvH4_7g11310	Cluster 3	9.81937	3.63212	1.30717	PDLP8	plasmodesmata-located protein 8
FvH4_7g13491	Cluster 3	96.5482	52.0143	38.0398		Calcium-dependent lipid-binding (CaLB domain) family protein
FvH4_7g14710	Cluster 3	59.4653	26.8925	16.5619	ARATH;BSAS3;1,ATCYSC1,CYSC1	cysteine synthase C1
FvH4_7g14840	Cluster 3	12.6716	8.03489	6.39965	CRCK2	calmodulin-binding receptor-like cytoplasmic kinase 2
FvH4_7g19211	Cluster 3	5.56175	3.49234	2.92126
FvH4_7g20380	Cluster 3	18.6681	8.54287	2.88855	RAP2.7,TOE1	related to AP2.7
FvH4_7g22180	Cluster 3	19.4621	11.897	7.94662	OBP3	OBF-binding protein 3
FvH4_7g25520	Cluster 3	56.2851	34.2739	17.2888
FvH4_7g25530	Cluster 3	143.873	51.304	14.4817		Hypoxia-responsive family protein
FvH4_7g32590	Cluster 3	3.00809	1.76127	0.309146
FvH4_7g32860	Cluster 3	11.3688	8.06569	5.5327		MATE efflux family protein
FvH4_c1g00130	Cluster 3	44.5283	25.2519	9.34211		NADH dehydrogenase subunit 7
FvH4_c1g00301	Cluster 3	130.615	64.601	28.2607		Ribosomal protein S13/S18 family
FvH4_c1g00520	Cluster 3	58.7372	34.8506	10.3934		NADH dehydrogenase 2A
FvH4_c1g00620	Cluster 3	20.0283	10.496	3.68672		Phototropic-responsive NPH3 family protein
FvH4_c1g00730	Cluster 3	4.99197	2.04386	0.630875	ATCSLD2,CSLD2	cellulose-synthase like D2
FvH4_c6g00070	Cluster 3	8.59979	3.29047	0.601592	AtIDD2,IDD2	indeterminate(ID)-domain 2
FvH4_1g00346	Cluster 3	56.0374	36.9809	26.0167		Zinc-binding dehydrogenase family protein
FvH4_1g00770	Cluster 3	227.285	134.994	91.4854		Low temperature and salt responsive protein family
FvH4_1g03080	Cluster 3	35.965	16.56	8.3918		Tetratricopeptide repeat (TPR)-like superfamily protein
FvH4_1g05400	Cluster 3	12.0376	4.22274	1.33056	ATTPS21,TPS21	terpene synthase 21
FvH4_1g07800	Cluster 3	11.7006	6.87023	5.4786	ATHSFA2,HSFA2	heat shock transcription factor A2
FvH4_1g08030	Cluster 3	19.4443	6.89704	3.27261	ATCFIM-25,CFIM-25	homolog of CFIM-25
FvH4_1g08230	Cluster 3	17.1367	10.2514	7.95407
FvH4_1g08320	Cluster 3	74.1238	38.4667	26.5772	ELF4-L3	ELF4-like 3
FvH4_1g08360	Cluster 3	27.1455	17.1622	9.44154		Stress responsive alpha-beta barrel domain protein
FvH4_1g10400	Cluster 3	3.42728	2.25036	1.20556		Ankyrin repeat family protein
FvH4_1g11270	Cluster 3	143.149	84.9113	26.097	atbzip14,FD,FD-1	Basic-leucine zipper (bZIP) transcription factor family protein
FvH4_1g14400	Cluster 3	161.93	89.5888	55.2567
FvH4_1g14900	Cluster 3	8.22791	4.40206	0.48583	ATMES1,MES1	methyl esterase 1
FvH4_1g14970	Cluster 3	65.9727	48.2117	29.1869		Dof-type zinc finger DNA-binding family protein
FvH4_1g15171	Cluster 3	11.8215	5.23075	1.9356		Disease resistance protein (CC-NBS-LRR class) family
FvH4_1g15410	Cluster 3	10.748	7.11869	4.66217	CONNEXIN,32	Protein kinase superfamily protein
FvH4_1g16910	Cluster 3	148.125	104.518	78.3099	MEE59	maternal effect embryo arrest 59
FvH4_1g17420	Cluster 3	32.7913	17.8988	6.18228		Acyl-CoA N-acyltransferases (NAT) superfamily protein
FvH4_1g18020	Cluster 3	8.10976	4.75559	1.91925		VQ motif-containing protein
FvH4_1g20190	Cluster 3	6.92814	4.35992	2.24585
FvH4_1g21200	Cluster 3	72.121	43.8745	21.4715		Haloacid dehalogenase-like hydrolase (HAD) superfamily protein
FvH4_1g26550	Cluster 3	113.809	75.9367	50.4687
FvH4_1g27030	Cluster 3	31.8001	18.0621	2.7		Zinc-binding ribosomal protein family protein
FvH4_1g27031	Cluster 3	12.6378	7.44833	1.22905
FvH4_1g28730	Cluster 3	21.4441	15.9165	9.84159		Protein of unknown function DUF2359, transmembrane
FvH4_2g23801	Cluster 3	28.6816	18.889	12.4141		Phenazine biosynthesis PhzC/PhzF protein
FvH4_2g25180	Cluster 3	346.714	183.5	49.6061	ATGSTF13	Glutathione S-transferase family protein
FvH4_2g25940	Cluster 3	18.9088	13.7052	10.4376	ATL5	AtL5
FvH4_2g28480	Cluster 3	60.5041	40.3803	13.8033		Intron maturase, type II family protein
FvH4_2g29300	Cluster 3	27.658	19.8141	9.5436		Nucleotide-sugar transporter family protein
FvH4_2g32310	Cluster 3	164.126	112.707	60.8862		3'-5' exonuclease domain-containing protein / K homology domain-containing protein / KH domain-containing protein
FvH4_2g33150	Cluster 3	19.8912	15.3858	9.50307		ARM repeat superfamily protein
FvH4_2g40900	Cluster 3	1.98225	1.25863	0.257531		HXXXD-type acyl-transferase family protein
FvH4_3g03650	Cluster 3	22.1684	17.2711	12.0343		Adenine nucleotide alpha hydrolases-like superfamily protein
FvH4_3g06620	Cluster 3	3.51581	2.79712	1.50266		GDSL-like Lipase/Acylhydrolase superfamily protein
FvH4_3g11900	Cluster 3	68.7822	46.9261	23.9634		Homeodomain-like superfamily protein
FvH4_3g13250	Cluster 3	7.35201	4.5841	2.44709
FvH4_3g16210	Cluster 3	15.4778	8.61144	2.68674	ATGSTU19,GST8,GSTU19	glutathione S-transferase TAU 19
FvH4_3g20030	Cluster 3	57.1678	42.2178	25.9233	ATMT3,MT3	metallothionein 3
FvH4_3g22890	Cluster 3	46.4262	32.1842	15.5912		Protein of unknown function, DUF584
FvH4_3g29640	Cluster 3	660.064	468.139	207.455		Stress responsive A/B Barrel Domain
FvH4_3g44720	Cluster 3	54.3037	41.5122	27.1915
FvH4_4g23860	Cluster 3	13.4774	9.98995	5.88291		ELMO/CED-12 family protein
FvH4_5g11100	Cluster 3	3.33006	2.39359	0.744956	MEE66	F-box family protein
FvH4_5g14661	Cluster 3	7.87801	5.34803	0.532282	AtMYB106,MYB106,NOK	myb domain protein 106
FvH4_5g15110	Cluster 3	17.6651	12.3459	4.42423	ATGSTU10,GSTU10	glutathione S-transferase TAU 10
FvH4_5g17900	Cluster 3	31.8073	21.0232	9.03011		NAD(P)-linked oxidoreductase superfamily protein
FvH4_5g32940	Cluster 3	5.78035	4.28501	2.67859		Protein of unknown function (DUF579)
FvH4_6g34420	Cluster 3	3.42994	2.2722	0.835427		NADH dehydrogenase 5A
FvH4_6g49680	Cluster 3	27.2253	19.7685	11.3865	CLE25	CLAVATA3/ESR-RELATED 25
FvH4_7g10710	Cluster 3	38.409	25.903	11.5193
FvH4_7g23040	Cluster 3	14.7813	9.1336	0.188485	RAB,RBE	C2H2 and C2HC zinc fingers superfamily protein
FvH4_7g27850	Cluster 3	175.183	128.877	59.42		Plant invertase/pectin methylesterase inhibitor superfamily protein
FvH4_7g29150	Cluster 3	3.6434	2.80449	0.468833	ATC	centroradialis
FvH4_1g03960	Cluster 3	4.50979	3.25854	1.57791	AKT1,ATAKT1,KT1	K+ transporter 1
FvH4_1g17280	Cluster 3	22.8622	17.0398	8.96481		Phototropic-responsive NPH3 family protein
FvH4_2g34870	Cluster 3	66.6629	47.0393	9.09736	ATRBP47C,RBP47C	RNA-binding protein 47C
FvH4_2g39380	Cluster 3	10.0844	7.85281	4.96086		HXXXD-type acyl-transferase family protein
FvH4_3g21500	Cluster 3	29.6347	20.2474	4.54446		Protein of unknown function, DUF538
FvH4_4g00770	Cluster 3	31.6251	25.5703	14.7705
FvH4_4g36420	Cluster 3	2.43703	1.87381	1.10307	ATPSKR1,PSKR1	phytosulfokin receptor 1
FvH4_5g09090	Cluster 3	4.38058	3.28064	1.48024		Uncharacterised protein family (UPF0497)
FvH4_5g37060	Cluster 3	12.0083	8.78356	2.81268		RNA-binding (RRM/RBD/RNP motifs) family protein
FvH4_6g26660	Cluster 3	9.95196	7.18948	2.865	ATGLK1,GLK1,GPRI1	GBF's pro-rich region-interacting factor 1
FvH4_7g02140	Cluster 3	4.1788	3.4475	1.99346	IQD11	IQ-domain 11
FvH4_7g17190	Cluster 3	26.4093	19.6447	5.0456	ATRAB-A3,ATRABA3,RABA3	RAB GTPase homolog A3
FvH4_7g18021	Cluster 3	7.52643	5.28255	0.180852
FvH4_7g25180	Cluster 3	9.4647	4.7186	1.47093	PYL6,RCAR9	PYR1-like 6
FvH4_7g32220	Cluster 3	26.0288	19.671	6.79015		Yippee family putative zinc-binding protein
FvH4_c1g00470	Cluster 3	58.6203	43.9704	17.8138		NADH dehydrogenase 5A
FvH4_2g28400	Cluster 3	135.651	107.793	56.1654		ATP synthase subunit 1
FvH4_3g03360	Cluster 3	45.1094	37.0284	20.8909
FvH4_3g30950	Cluster 3	6.21984	4.50554	0.413812	AtMYB36,MYB36	myb domain protein 36
FvH4_4g27540	Cluster 3	65.6642	52.439	29.8662
FvH4_5g11680	Cluster 3	3.70734	2.9453	1.03323	ATCSLG3,CSLG3	cellulose synthase like G3
FvH4_5g12770	Cluster 3	5.51212	4.10764	1.17123		Oleosin family protein
FvH4_6g10270	Cluster 3	150.221	119.186	68.046
FvH4_6g03740	Cluster 3	12.7056	10.3417	2.83116	BIP,BIP2	Heat shock protein 70 (Hsp 70) family protein
FvH4_6g16670	Cluster 3	50.009	41.3286	23.1557		Pectin lyase-like superfamily protein
FvH4_6g44480	Cluster 3	37.2563	30.6755	16.9084		PapD-like superfamily protein
FvH4_2g05080	Cluster 3	16.2804	13.142	3.81522		NADH dehydrogenase subunit 7
FvH4_2g25210	Cluster 3	449.532	363.898	152.464	ATGSTF5,ATGSTF8,GST6,GSTF8	glutathione S-transferase phi 8
FvH4_3g32220	Cluster 3	193.321	161.271	88.4527		Protein of unknown function, DUF584
FvH4_3g39340	Cluster 3	12.3765	10.6557	5.65054		RNI-like superfamily protein
FvH4_5g36870	Cluster 3	4.69228	3.85569	2.14802	ATGSTU8,GSTU8	glutathione S-transferase TAU 8
FvH4_6g01210	Cluster 3	67.2316	55.0431	13.0754
FvH4_6g53292	Cluster 3	8.08971	6.92005	3.09195		Galactose oxidase/kelch repeat superfamily protein
FvH4_2g25860	Cluster 3	195.502	164.975	58.957	AtLEA5,SAG21	senescence-associated gene 21
FvH4_6g30160	Cluster 3	153.224	134.754	78.4926		Lactoylglutathione lyase / glyoxalase I family protein
FvH4_6g30320	Cluster 3	107.078	92.778	45.0245		Ran BP2/NZF zinc finger-like superfamily protein
FvH4_1g04931	Cluster 3	31.8101	27.3067	13.9449
FvH4_1g20090	Cluster 3	4.8088	4.08996	1.13296		MATE efflux family protein
FvH4_2g19210	Cluster 3	52.193	44.0281	25.225	CLE44	CLAVATA3/ESR-RELATED 44
FvH4_4g27890	Cluster 3	1.95335	1.67157	0.489871		Pyridoxal-dependent decarboxylase family protein
FvH4_5g05190	Cluster 3	9.91771	8.65436	4.74519	PG2	polygalacturonase 2
FvH4_1g30330	Cluster 3	2.45486	2.03569	0.271351	GAD,GAD1	glutamate decarboxylase
FvH4_4g18200	Cluster 3	5.76278	4.879	1.26336		Concanavalin A-like lectin protein kinase family protein
FvH4_4g22650	Cluster 3	22.0472	19.2871	6.26574		Integrase-type DNA-binding superfamily protein
FvH4_4g18340	Cluster 3	93.5836	85.4177	38.6346
FvH4_5g31950	Cluster 3	256.37	241.467	152.478
FvH4_1g18270	Cluster 3	84.8243	77.4021	39.5701	ANT,CKC,CKC1,DRG	Integrase-type DNA-binding superfamily protein
FvH4_2g05600	Cluster 3	2.51429	2.42521	1.3693	UGT73B3	UDP-glucosyl transferase 73B3
FvH4_1g10180	Cluster 4	5.03693	0.273632	1.86261		Auxin efflux carrier family protein
FvH4_3g29140	Cluster 4	138.37	57.9696	84.388
FvH4_3g43950	Cluster 4	61.0045	26.3477	37.6478		NB-ARC domain-containing disease resistance protein
FvH4_3g44070	Cluster 4	8.58034	1.95169	4.17414		NB-ARC domain-containing disease resistance protein
FvH4_5g01400	Cluster 4	37.0238	8.48983	16.2204	NRPD1,NRPD1A,POL,IVA,SDE4,SMD2	nuclear RNA polymerase D1A
FvH4_6g54060	Cluster 4	18.371	7.60474	10.8152		Esterase/lipase/thioesterase family protein
FvH4_7g22750	Cluster 4	3.13033	1.01323	1.59087		Protein of unknown function (DUF674)
FvH4_7g25910	Cluster 4	69.0005	14.4091	27.1291
FvH4_1g06350	Cluster 4	60.5498	12.791	29.1029		Pectin lyase-like superfamily protein
FvH4_1g07480	Cluster 4	4.19685	1.29399	2.22336	AtTMN7,TMN7	transmembrane nine 7
FvH4_1g23570	Cluster 4	14.0316	5.92789	8.92714		Plastid-lipid associated protein PAP / fibrillin family protein
FvH4_2g09110	Cluster 4	4.2827	1.27696	2.41192		NmrA-like negative transcriptional regulator family protein
FvH4_2g15050	Cluster 4	690.418	120.37	289.945	ARPN	plantacyanin
FvH4_2g15511	Cluster 4	3.18683	0.87358	1.66172		FAD/NAD(P)-binding oxidoreductase family protein
FvH4_2g23440	Cluster 4	4.72392	0.430926	1.73205	ABC33,ATCPS1,CPS,CPS1,GA1	Terpenoid cyclases/Protein prenyltransferases superfamily protein
FvH4_2g27701	Cluster 4	3.64803	0.1465	1.21072		disease resistance protein (TIR-NBS-LRR class), putative
FvH4_2g27710	Cluster 4	4.55165	0.357457	1.81414		Protein kinase superfamily protein
FvH4_2g38400	Cluster 4	126.274	44.4345	74.2108	TUB1	tubulin beta-1 chain
FvH4_3g01880	Cluster 4	126.771	45.4422	72.1508		O-Glycosyl hydrolases family 17 protein
FvH4_3g07120	Cluster 4	44.3477	38.9484	29.5785	ATSYP132,SYP132	syntaxin of plants 132
FvH4_3g07770	Cluster 4	202.289	4.54444	63.94	LSH10	Protein of unknown function (DUF640)
FvH4_3g16960	Cluster 4	11.1106	4.65807	7.08834	ATGSL04,atgsl4,gsl04	glucan synthase-like 4
FvH4_3g20810	Cluster 4	7.28741	1.36197	3.08117
FvH4_3g38450	Cluster 4	24.7825	8.78769	13.4547	ATVLN1,VLN1	villin-like 1
FvH4_3g39130	Cluster 4	5.01988	1.59427	2.60967	ATBAG4,BAG4	BCL-2-associated athanogene 4
FvH4_3g42361	Cluster 4	16.7877	5.84556	9.41853
FvH4_3g42743	Cluster 4	5.23108	1.14176	2.46278	ATCSLE1,CSLE1	cellulose synthase like E1
FvH4_3g44670	Cluster 4	2.46232	0.894104	1.31142		NB-ARC domain-containing disease resistance protein
FvH4_3g45630	Cluster 4	9.8604	4.07723	5.90185		disease resistance protein (TIR-NBS-LRR class), putative
FvH4_4g01350	Cluster 4	13.4318	5.06882	7.18218	ATB2	NAD(P)-linked oxidoreductase superfamily protein
FvH4_4g16070	Cluster 4	7.41122	3.07238	4.44054		Serine/threonine-protein kinase WNK (With No Lysine)-related
FvH4_4g16850	Cluster 4	5.01356	0.390493	1.4764		inosine-uridine preferring nucleoside hydrolase family protein
FvH4_4g19680	Cluster 4	19.4578	4.62343	9.51908
FvH4_4g21530	Cluster 4	9.19954	1.25573	3.14392	CIPK1,SnRK3.16	CBL-interacting protein kinase 1
FvH4_4g22100	Cluster 4	5.5583	1.62303	2.93298	ATRBOHD,RBOHD	respiratory burst oxidase homologue D
FvH4_4g26090	Cluster 4	127.584	28.1428	50.6375	KNAT6,KNAT6L,KNAT6S	KNOTTED1-like homeobox gene 6
FvH4_4g27110	Cluster 4	223.053	72.8713	116.159	AGL22,SVP	K-box region and MADS-box transcription factor family protein
FvH4_4g30960	Cluster 4	1.98408	0.0150797	0.523951
FvH4_4g33130	Cluster 4	63.624	12.2397	26.1845	AHK4,ATCRE1,CRE1,WOL,WOL1	CHASE domain containing histidine kinase protein
FvH4_4g33391	Cluster 4	47.7523	18.6007	27.5268	ATRDRP1,RDR1	RNA-dependent RNA polymerase 1
FvH4_4g35030	Cluster 4	9.76014	3.44377	5.03355		DNA polymerase lambda (POLL)
FvH4_5g03180	Cluster 4	31.5693	12.0047	19.7286
FvH4_5g03870	Cluster 4	3.95772	0.684081	1.70027		Zinc-binding dehydrogenase family protein
FvH4_5g10010	Cluster 4	2.80682	0.52641	1.0479	ATRBOHC,RBOHC,RHD2	NADPH/respiratory burst oxidase protein D
FvH4_5g11670	Cluster 4	4.04268	0.451859	1.38649		RING/U-box superfamily protein
FvH4_5g15240	Cluster 4	1.66018	0.495891	0	BHLH161,BNQ3	BANQUO 3
FvH4_5g15540	Cluster 4	30.3211	8.74184	14.9478		NAD(P)-binding Rossmann-fold superfamily protein
FvH4_5g18160	Cluster 4	3.0362	0.929202	1.61535	ATSUS6,SUS6	sucrose synthase 6
FvH4_5g18490	Cluster 4	34.3229	12.2585	19.33		GRAM domain-containing protein / ABA-responsive protein-related
FvH4_5g20800	Cluster 4	7.65411	2.12626	3.46072	BAM3,BMY8,CT-BMY	chloroplast beta-amylase
FvH4_5g25150	Cluster 4	3.26241	0.483631	1.36459	CYP707A1	cytochrome P450, family 707, subfamily A, polypeptide 1
FvH4_5g26330	Cluster 4	6.09079	2.06919	3.0877		Auxin efflux carrier family protein
FvH4_5g28280	Cluster 4	5.00607	0.764617	1.67676		FAD/NAD(P)-binding oxidoreductase family protein
FvH4_5g34210	Cluster 4	7.74065	2.34534	4.03029		Disease resistance protein (TIR-NBS-LRR class) family
FvH4_5g35630	Cluster 4	5.29077	1.21342	2.39785	REN1	Rho GTPase activation protein (RhoGAP) with PH domain
FvH4_5g36240	Cluster 4	92.5487	33.8934	51.0104		basic helix-loop-helix (bHLH) DNA-binding superfamily protein
FvH4_5g39760	Cluster 4	25.2234	10.0971	15.4123
FvH4_6g01320	Cluster 4	3.20432	0.821028	1.42351		Leucine-rich repeat protein kinase family protein
FvH4_6g01941	Cluster 4	76.9024	22.2159	39.9385	THA1	threonine aldolase 1
FvH4_6g02870	Cluster 4	18.3375	2.83546	6.0127	ATAUX2-11,IAA4	AUX/IAA transcriptional regulator family protein
FvH4_6g07180	Cluster 4	46.4444	21.7295	30.9256	ULP1A	UB-like protease 1A
FvH4_6g13451	Cluster 4	27.8747	9.01019	12.8283
FvH4_6g15200	Cluster 4	6.52502	1.16532	2.84465	APX1B,APX2	ascorbate peroxidase 2
FvH4_6g18040	Cluster 4	7.87763	2.15011	3.99473		Haloacid dehalogenase-like hydrolase (HAD) superfamily protein
FvH4_6g20910	Cluster 4	13.9895	5.07998	8.45354
FvH4_6g24090	Cluster 4	47.0037	16.6648	24.4167		Integrase-type DNA-binding superfamily protein
FvH4_6g29130	Cluster 4	29.972	12.3196	16.792		Sterile alpha motif (SAM) domain-containing protein
FvH4_6g36790	Cluster 4	3.8437	0.917672	1.75012		Leucine-rich receptor-like protein kinase family protein
FvH4_6g37580	Cluster 4	4.1557	0.346087	1.11491
FvH4_6g40570	Cluster 4	10.3333	4.33147	5.94927		Protein kinase superfamily protein
FvH4_6g43530	Cluster 4	28.9465	10.8211	16.596		Zinc finger C-x8-C-x5-C-x3-H type family protein
FvH4_6g44470	Cluster 4	284.925	88.4116	138.414		Wound-responsive family protein
FvH4_6g45780	Cluster 4	3.36263	0.614353	1.40093	scpl18	serine carboxypeptidase-like 18
FvH4_7g02401	Cluster 4	2.36891	0.274679	0.836122		LRR and NB-ARC domains-containing disease resistance protein
FvH4_7g08920	Cluster 4	85.9051	26.6062	42.957		Protein of unknown function (DUF581)
FvH4_7g09310	Cluster 4	3.31867	0.285668	1.16881		Ankyrin repeat family protein
FvH4_7g10520	Cluster 4	9.06696	2.89384	4.2146		Disease resistance protein (TIR-NBS-LRR class) family
FvH4_7g13190	Cluster 4	4.69716	1.61238	2.57773		basic helix-loop-helix (bHLH) DNA-binding superfamily protein
FvH4_7g17950	Cluster 4	4.35086	0.855388	2.09598	anac028,NAC028	NAC domain containing protein 28
FvH4_7g18020	Cluster 4	2.27446	0.257314	0.776825	NTL9	NAC transcription factor-like 9
FvH4_7g18260	Cluster 4	5.73191	0.440422	1.90931	anac028,NAC028	NAC domain containing protein 28
FvH4_7g22640	Cluster 4	26.7926	11.9611	16.876	NIK1	NSP-interacting kinase 1
FvH4_7g22651	Cluster 4	3.22693	0.150079	0	CYP71A23	cytochrome P450, family 71, subfamily A, polypeptide 23
FvH4_7g23620	Cluster 4	18.4767	8.3065	11.8351	ATGC1,GC1	guanylyl cyclase 1
FvH4_7g28161	Cluster 4	2.30705	0.245456	0.724856
FvH4_7g28670	Cluster 4	10.7414	2.58673	5.35168	AT2301,ATGA20OX1,GA20OX1,GA5	2-oxoglutarate (2OG) and Fe(II)-dependent oxygenase superfamily protein
FvH4_7g31370	Cluster 4	9.46678	3.71729	5.57035		Ribonuclease P protein subunit P38-related
FvH4_7g31940	Cluster 4	4.2759	0.417251	1.31083	ATCNGC1,CNGC1	cyclic nucleotide gated channel 1
FvH4_7g32470	Cluster 4	2.23104	0.634773	1.09667		disease resistance protein (TIR-NBS-LRR class), putative
FvH4_7g32740	Cluster 4	4.07071	0.909505	1.74342		disease resistance protein (TIR-NBS-LRR class), putative
FvH4_7g33080	Cluster 4	10.0428	3.96041	5.89854		Calcium-binding endonuclease/exonuclease/phosphatase family
FvH4_1g06000	Cluster 4	27.8861	5.46751	10.5232	ATNADP-ME3,NADP-ME3	NADP-malic enzyme 3
FvH4_1g07850	Cluster 4	83.2191	16.3923	29.5362	CHAL,EPFL6	allergen-related
FvH4_1g08390	Cluster 4	2.07196	0.161431	0.620216	ATMYB123,ATTT2,MYB123,TT2	Duplicated homeodomain-like superfamily protein
FvH4_1g08400	Cluster 4	10.9645	1.73191	3.86485		RNA polymerase III RPC4
FvH4_1g08970	Cluster 4	2.45887	0.714986	1.09271		Protein of unknown function (DUF300)
FvH4_1g10310	Cluster 4	5.23453	1.92773	2.99827		Transducin/WD40 repeat-like superfamily protein
FvH4_1g12560	Cluster 4	9.93524	3.00181	5.37245	XERO1	dehydrin xero 1
FvH4_1g15700	Cluster 4	13.6714	4.56067	6.76008		Protein of unknown function, DUF547
FvH4_1g15840	Cluster 4	31.7017	10.3447	17.244
FvH4_1g16104	Cluster 4	3.5133	0.17185	1.06652		alpha/beta-Hydrolases superfamily protein
FvH4_1g16210	Cluster 4	19.6442	8.54172	11.7422		Protein kinase superfamily protein
FvH4_1g16340	Cluster 4	19.6563	5.82217	9.35317		Plant protein of unknown function (DUF869)
FvH4_1g17200	Cluster 4	12.5119	5.46606	8.74038		Protein of unknown function (DUF1230)
FvH4_1g17821	Cluster 4	3.02827	0.53288	1.34365		Ribonuclease H-like superfamily protein
FvH4_1g18540	Cluster 4	17.3365	7.81081	11.1339		zinc ion binding
FvH4_1g18650	Cluster 4	10.1907	3.24688	5.26512
FvH4_1g19100	Cluster 4	6.32227	1.74736	2.61648
FvH4_1g20240	Cluster 4	15.0729	3.5594	6.37278
FvH4_2g03461	Cluster 4	4.3436	0.652021	1.31655		F-box/RNI-like superfamily protein
FvH4_2g05530	Cluster 4	30.3233	10.4451	15.6447		Leucine-rich repeat (LRR) family protein
FvH4_2g05603	Cluster 4	8.0484	1.50644	6.61064	UGT73B3	UDP-glucosyl transferase 73B3
FvH4_2g06620	Cluster 4	29.0006	11.4045	17.1625		alpha/beta-Hydrolases superfamily protein
FvH4_2g09360	Cluster 4	5.91268	0.96132	1.94797		Disease resistance protein (TIR-NBS-LRR class) family
FvH4_2g10870	Cluster 4	1.89255	0.0453979	0.625724		SAUR-like auxin-responsive protein family
FvH4_2g11420	Cluster 4	30.4813	10.3603	15.8905	ATHVA22A,HVA22A	HVA22 homologue A
FvH4_2g12960	Cluster 4	9.23039	4.00696	5.77038		DNAse I-like superfamily protein
FvH4_2g13090	Cluster 4	9.48129	3.58707	5.10937		Protein kinase superfamily protein
FvH4_2g14760	Cluster 4	7.75978	1.48652	2.87012	ADH,ADH1,ATADH,ATADH1	alcohol dehydrogenase 1
FvH4_2g17520	Cluster 4	32.0812	6.89005	12.7537		alpha/beta-Hydrolases superfamily protein
FvH4_2g19790	Cluster 4	23.489	9.7296	13.074	PIF1,PIL5	phytochrome interacting factor 3-like 5
FvH4_2g20300	Cluster 4	5.26156	1.27351	2.39363	ABCG40,ATABCG40,ATPDR12,PDR12	pleiotropic drug resistance 12
FvH4_2g21540	Cluster 4	13.5816	3.83207	6.52253	PHT1;7	phosphate transporter 1;7
FvH4_2g25190	Cluster 4	1.995	0.579561	0	LCR69,PDF2.2	low-molecular-weight cysteine-rich 69
FvH4_2g29352	Cluster 4	5.55847	0.666847	1.73027
FvH4_2g32900	Cluster 4	46.1613	11.1861	20.9107
FvH4_2g33410	Cluster 4	11.9507	1.64301	4.3017		Gibberellin-regulated family protein
FvH4_2g33540	Cluster 4	20.59	7.03223	10.5	HOS15	WD-40 repeat family protein
FvH4_2g35280	Cluster 4	14.1639	1.01686	3.12915	IAA26,PAP1	phytochrome-associated protein 1
FvH4_2g36950	Cluster 4	481.908	193.056	272.115	ATMYB3,MYB3	myb domain protein 3
FvH4_2g37840	Cluster 4	11.5764	0.548199	2.1464	AMY2,ATAMY2	alpha-amylase-like 2
FvH4_2g39350	Cluster 4	87.8571	25.694	41.1958	AtbZIP44,bZIP44	basic leucine-zipper 44
FvH4_3g01830	Cluster 4	8.81651	1.31376	2.89201		Homeodomain-like superfamily protein
FvH4_3g07740	Cluster 4	22.0986	3.23909	6.402
FvH4_3g09291	Cluster 4	29.098	7.04459	11.0618		Disease resistance protein (TIR-NBS-LRR class) family
FvH4_3g10700	Cluster 4	36.5756	13.9404	18.0642		ethylene-responsive nuclear protein / ethylene-regulated nuclear protein (ERT2)
FvH4_3g11500	Cluster 4	4.44015	0.41466	1.20026
FvH4_3g13780	Cluster 4	2.88204	1.10492	1.57453	AGC1.5	AGC kinase 1.5
FvH4_3g15430	Cluster 4	2.71874	0.998768	1.44481		Leucine-rich repeat transmembrane protein kinase
FvH4_3g17650	Cluster 4	128.816	19.4374	41.3656	ATTPS1,TPS1	trehalose-6-phosphate synthase
FvH4_3g19691	Cluster 4	175.989	64.9955	85.5544
FvH4_3g30700	Cluster 4	2.67436	0.419722	0.833836	APM4,ATPEX12,PEX12	peroxin-12
FvH4_3g43220	Cluster 4	20.9483	5.72629	8.90897		AGC (cAMP-dependent, cGMP-dependent and protein kinase C) kinase family protein
FvH4_4g00822	Cluster 4	71.1489	24.8768	33.157		Kinase interacting (KIP1-like) family protein
FvH4_4g18920	Cluster 4	6.49927	1.06842	1.81393
FvH4_4g21071	Cluster 4	14.0124	2.6231	4.6656
FvH4_4g31230	Cluster 4	96.3134	13.8228	27.2873		Homeodomain-like superfamily protein
FvH4_4g33000	Cluster 4	2.37148	0.116495	0.420204	TBL2	Plant protein of unknown function (DUF828)
FvH4_4g33460	Cluster 4	53.1455	19.9424	26.7391		Sec14p-like phosphatidylinositol transfer family protein
FvH4_4g33881	Cluster 4	85.0013	29.0495	39.4168		Dynein light chain type 1 family protein
FvH4_5g00430	Cluster 4	271.285	38.5339	75.5168	PME1	pectin methylesterase inhibitor 1
FvH4_5g03320	Cluster 4	23.3278	0.414486	2.98905		Late embryogenesis abundant (LEA) hydroxyproline-rich glycoprotein family
FvH4_5g03781	Cluster 4	3.26152	0.890058	1.41524	ATMRP14,MRP14	multidrug resistance-associated protein 14
FvH4_5g10580	Cluster 4	674.121	171.745	274.798		UDP-Glycosyltransferase superfamily protein
FvH4_5g27750	Cluster 4	5.51638	1.31011	2.16398	STRS1	DEA(D/H)-box RNA helicase family protein
FvH4_5g30910	Cluster 4	4.60654	1.73886	2.28196	ATCAP-C,ATSMC3,ATSMC4,SMC3	structural maintenance of chromosome 3
FvH4_5g36910	Cluster 4	34.3706	8.81198	12.51	EXO	Phosphate-responsive 1 family protein
FvH4_6g04261	Cluster 4	4.29562	0.40394	1.00995		Frigida-like protein
FvH4_6g05111	Cluster 4	13.719	4.94374	6.6506	ESL1	ERD (early response to dehydration) six-like 1
FvH4_6g09130	Cluster 4	8.67802	1.13981	2.10357
FvH4_6g10791	Cluster 4	154.879	57.5492	76.9261
FvH4_6g11970	Cluster 4	6.35936	1.13168	2.11022	ATPTR5,PTR5	peptide transporter 5
FvH4_6g13450	Cluster 4	14.0716	3.18164	5.07031		NB-ARC domain-containing disease resistance protein
FvH4_6g22181	Cluster 4	6.28636	0.60849	1.69603		Ribonuclease H-like superfamily protein
FvH4_6g22501	Cluster 4	1.94225	0.599814	0
FvH4_6g27610	Cluster 4	24.4934	2.54102	6.13683		Peroxidase superfamily protein
FvH4_6g30880	Cluster 4	30.5466	6.90488	10.6215		catalytic LigB subunit of aromatic ring-opening dioxygenase family
FvH4_6g35560	Cluster 4	6.99515	0.828899	1.9712	LAC14	laccase 14
FvH4_6g43500	Cluster 4	6.17149	0.101018	0.899462	RCI3,RCI3A	Peroxidase superfamily protein
FvH4_6g44360	Cluster 4	33.0384	6.37364	11.4534	CYCD6;1	Cyclin D6;1
FvH4_6g48880	Cluster 4	3.72551	1.38166	1.82946		Pentatricopeptide repeat (PPR) superfamily protein
FvH4_6g53351	Cluster 4	13.4753	0.788656	2.21776	AT-SO,AtSO,SOX	sulfite oxidase
FvH4_7g02970	Cluster 4	21.4601	6.25779	8.47915	ARR9,ATRR4	response regulator 9
FvH4_7g22593	Cluster 4	25.7918	7.29698	11.0312	APK1,APK1A	Protein kinase superfamily protein
FvH4_7g24390	Cluster 4	15.5326	4.3377	6.12809		Alpha/beta hydrolase related protein
FvH4_7g25683	Cluster 4	3.55727	1.67193	2.19718		NB-ARC domain-containing disease resistance protein
FvH4_7g30150	Cluster 4	6.27797	0.863317	1.66705		Protein of unknown function (DUF819)
FvH4_7g31470	Cluster 4	3.4065	1.0812	1.44602		2-oxoglutarate (2OG) and Fe(II)-dependent oxygenase superfamily protein
FvH4_7g31640	Cluster 4	5.23885	1.30178	2.10133		Phosphatidylinositol 3- and 4-kinase ;Ubiquitin family protein
FvH4_1g05040	Cluster 4	948.671	405.212	512.013	AGP16,ATAGP16	arabinogalactan protein 16
FvH4_1g14680	Cluster 4	12.2172	0.869064	2.47803	REM39,VRN1	AP2/B3-like transcriptional factor family protein
FvH4_1g15090	Cluster 4	9.93476	4.14645	5.14938		Disease resistance protein (CC-NBS-LRR class) family
FvH4_1g16103	Cluster 4	9.72334	0.562321	1.46846		alpha/beta-Hydrolases superfamily protein
FvH4_1g16350	Cluster 4	99.7147	11.2767	20.8969	AP2,FL1,FLO2	Integrase-type DNA-binding superfamily protein
FvH4_1g16970	Cluster 4	3.06952	0.0926756	0.557704		C2H2 and C2HC zinc fingers superfamily protein
FvH4_1g21110	Cluster 4	14.1001	3.74977	5.2916		VQ motif-containing protein
FvH4_1g22820	Cluster 4	8.58893	0.536376	1.7502	ATWRKY51,WRKY51	WRKY DNA-binding protein 51
FvH4_1g26220	Cluster 4	27.9061	8.85977	11.3958		Pectin lyase-like superfamily protein
FvH4_2g05731	Cluster 4	43.2792	11.7271	17.4496		Plant protein of unknown function (DUF869)
FvH4_2g09350	Cluster 4	3.66535	0.9215	1.32315		Disease resistance protein (TIR-NBS-LRR class) family
FvH4_2g22530	Cluster 4	6.69379	1.56886	2.5745	ATAUX2-11,IAA4	AUX/IAA transcriptional regulator family protein
FvH4_2g25220	Cluster 4	2.59097	0.525108	0.608027	ATGSTF5,ATGSTF8,GST6,GSTF8	glutathione S-transferase phi 8
FvH4_2g32640	Cluster 4	116.542	51.8012	61.9389	ANT,CKC,CKC1,DRG	Integrase-type DNA-binding superfamily protein
FvH4_3g02732	Cluster 4	4.45344	0.301928	0.702349	CRK25	cysteine-rich RLK (RECEPTOR-like protein kinase) 25
FvH4_3g07021	Cluster 4	11.8593	0.34791	1.57343
FvH4_3g07045	Cluster 4	12.772	4.74594	5.96383	RKF1	receptor-like kinase in flowers 1
FvH4_3g14860	Cluster 4	44.1208	10.531	15.4036		Domain of unknown function (DUF2431)
FvH4_3g15903	Cluster 4	3.67138	0.787425	0.90319		HXXXD-type acyl-transferase family protein
FvH4_3g23080	Cluster 4	9.85356	2.83061	3.85247		F-box family protein with a domain of unknown function (DUF295)
FvH4_3g23200	Cluster 4	2.804	0.28184	0.496685		Auxin-responsive family protein
FvH4_3g40030	Cluster 4	20.4819	9.13572	11.1033
FvH4_3g40280	Cluster 4	135.262	27.3903	43.2266	CHAL,EPFL6	allergen-related
FvH4_3g43490	Cluster 4	18.3226	1.08649	2.77372	BGLU17	beta glucosidase 17
FvH4_4g00050	Cluster 4	10.8329	4.49876	5.7562	ATCLH2,CLH2	chlorophyllase 2
FvH4_4g02460	Cluster 4	1299.97	15.6368	119.886
FvH4_4g03750	Cluster 4	54.236	11.086	16.0113	LSH6	Protein of unknown function (DUF640)
FvH4_4g06960	Cluster 4	8.33268	2.88836	3.62466		F-box family protein
FvH4_4g07870	Cluster 4	79.1767	28.8007	34.9956	ATHPT,HPT1,TPT1,VTE2	homogentisate phytyltransferase 1
FvH4_4g09490	Cluster 4	10.5636	2.06191	2.95366
FvH4_4g15596	Cluster 4	11.0508	5.31916	6.59994
FvH4_4g15601	Cluster 4	28.9733	11.4087	13.6773
FvH4_4g34360	Cluster 4	3.6375	0.0900495	0.407296		Protein kinase superfamily protein
FvH4_5g03782	Cluster 4	2.13783	0.0820577	0.220289	ATMRP14,MRP14	multidrug resistance-associated protein 14
FvH4_5g04420	Cluster 4	161.214	17.7596	30.0009	SLP3	subtilisin-like serine protease 3
FvH4_5g05550	Cluster 4	16.3839	3.91944	5.06125
FvH4_5g09421	Cluster 4	47.2459	10.2764	14.5776		Glycosyl hydrolase family 38 protein
FvH4_5g16230	Cluster 4	62.0424	15.3548	20.2005		alpha/beta-Hydrolases superfamily protein
FvH4_5g27870	Cluster 4	43.8048	4.70913	8.75839	AtMYB117,LOF1,MYB117	myb domain protein 117
FvH4_5g33810	Cluster 4	45.3351	6.71813	10.4998	bHLH093	beta HLH protein 93
FvH4_5g36920	Cluster 4	108.195	39.6898	46.8249	EXO	Phosphate-responsive 1 family protein
FvH4_6g08610	Cluster 4	32.3656	13.6148	16.3672	PAP3,PIF3,POC1	phytochrome interacting factor 3
FvH4_6g10801	Cluster 4	5.01128	2.86135	3.99022	OSH1	gamma interferon responsive lysosomal thiol (GILT) reductase family protein
FvH4_6g18480	Cluster 4	60.9265	0	5.5473	ATC	centroradialis
FvH4_6g19530	Cluster 4	8.34342	0.366603	1.17602		F-box family protein
FvH4_6g21020	Cluster 4	2.2754	0.076406	0.221133	CPK20	calcium-dependent protein kinase 20
FvH4_6g28100	Cluster 4	8.91964	3.4649	4.15659		S-adenosyl-L-methionine-dependent methyltransferases superfamily protein
FvH4_6g28350	Cluster 4	5.85691	0.887111	1.31357
FvH4_6g35580	Cluster 4	4.53995	0.436985	0.876505	GLIP1	GDSL lipase 1
FvH4_6g36190	Cluster 4	10.3295	2.33904	3.37746		alpha/beta-Hydrolases superfamily protein
FvH4_6g38570	Cluster 4	12.3017	4.46263	5.61084
FvH4_6g44245	Cluster 4	4.13402	0.538579	0.867895		S-locus lectin protein kinase family protein
FvH4_6g46500	Cluster 4	52.404	14.5597	19.4353	BR6OX2,CYP85A2	brassinosteroid-6-oxidase 2
FvH4_6g48240	Cluster 4	9.65984	2.6521	3.36449		Calcium-binding EF-hand family protein
FvH4_6g50162	Cluster 4	3.10535	0.803492	0.929779	SAG101	senescence-associated gene 101
FvH4_6g53330	Cluster 4	20.9871	1.36483	2.76979	CYP94B2	cytochrome P450, family 94, subfamily B, polypeptide 2
FvH4_6g53352	Cluster 4	9.11141	1.29494	3.06325	AT-SO,AtSO,SOX	sulfite oxidase
FvH4_7g02633	Cluster 4	2.12729	0.21523	0.381447	ANN3,ANNAT3	annexin 3
FvH4_7g09150	Cluster 4	3.81116	0.237653	0.523035	ARAC9,ATROP8,ROP8	Arabidopsis RAC-like 9
FvH4_7g18000	Cluster 4	5.59216	0.478373	0.981207	anac028,NAC028	NAC domain containing protein 28
FvH4_7g18380	Cluster 4	5.60474	0.874448	1.30837		Protein of unknown function (DUF1635)
FvH4_7g25890	Cluster 4	57.8518	25.6359	29.465		Chalcone-flavanone isomerase family protein
FvH4_7g26600	Cluster 4	4.03877	0.590674	0.823815		disease resistance family protein / LRR family protein
FvH4_1g04030	Cluster 4	2.12787	0.49523	0.635985		SOUL heme-binding family protein
FvH4_1g04940	Cluster 4	38.6376	13.7156	17.0658	ATRAB-F2A,ATRAB5A,ATRABF2A,RAB-F2A,RAB5A,RABF2A,RHA1	RAB homolog 1
FvH4_1g05990	Cluster 4	17.4378	3.75707	5.24383		RNA-dependent RNA polymerase family protein
FvH4_1g06360	Cluster 4	19.5334	6.63617	8.426		Peptidase M28 family protein
FvH4_1g07470	Cluster 4	3.82349	0.327628	0.501122	AtTMN7,TMN7	transmembrane nine 7
FvH4_1g07670	Cluster 4	19.5614	3.39161	4.31321		alpha/beta-Hydrolases superfamily protein
FvH4_1g10720	Cluster 4	10.4555	1.47459	1.99226		Arabidopsis protein of unknown function (DUF241)
FvH4_1g11392	Cluster 4	4.05645	0.557117	0.793139		Heavy metal transport/detoxification superfamily protein
FvH4_1g12716	Cluster 4	11.2952	0.877628	1.54242		P-loop containing nucleoside triphosphate hydrolases superfamily protein
FvH4_1g16301	Cluster 4	3.27396	0.502833	0.782814		HXXXD-type acyl-transferase family protein
FvH4_1g17210	Cluster 4	35.5872	5.49597	7.39619		2-oxoglutarate (2OG) and Fe(II)-dependent oxygenase superfamily protein
FvH4_1g17970	Cluster 4	14.9034	0.561189	1.09423	scpl1	serine carboxypeptidase-like 1
FvH4_2g09250	Cluster 4	21.3732	4.36615	5.80464	APL3	Glucose-1-phosphate adenylyltransferase family protein
FvH4_2g10010	Cluster 4	16.9123	3.64796	4.44263	SRS3	SHI-related sequence3
FvH4_2g15330	Cluster 4	6.51683	0.497835	0.736662		Pyridoxal phosphate (PLP)-dependent transferases superfamily protein
FvH4_2g17950	Cluster 4	19.3316	8.41462	9.55931	EPFL9,STOMAGEN	stomagen
FvH4_2g18930	Cluster 4	5.56434	0.286259	0.492651	ATDCL3,DCL3	dicer-like 3
FvH4_2g27900	Cluster 4	5.17819	1.98791	2.29339		Glutathione S-transferase family protein
FvH4_3g01120	Cluster 4	18.7982	0.732051	1.44837
FvH4_3g04020	Cluster 4	51.4126	16.7437	20.4346		F-box family protein
FvH4_3g07044	Cluster 4	29.4554	9.35681	11.2629	RKF1	receptor-like kinase in flowers 1
FvH4_3g07930	Cluster 4	14.8771	4.9596	5.80088
FvH4_3g08470	Cluster 4	190.815	79.4956	94.5938	GRX480,roxy19	Thioredoxin superfamily protein
FvH4_3g09290	Cluster 4	30.1925	7.38609	8.73085		disease resistance protein (TIR-NBS-LRR class), putative
FvH4_3g15440	Cluster 4	4.28767	2.03861	2.31272		Leucine-rich repeat transmembrane protein kinase
FvH4_3g41230	Cluster 4	13.7378	6.47699	7.40937	FHIT	FRAGILE HISTIDINE TRIAD
FvH4_3g42750	Cluster 4	5.01697	0.929275	1.3121	ATCSLE1,CSLE1	cellulose synthase like E1
FvH4_3g44671	Cluster 4	2.44531	0.0962463	0.273096		F-box and associated interaction domains-containing protein
FvH4_4g00100	Cluster 4	27.1669	9.56512	11.5198	AtTHO7,THO7	Tho complex subunit 7/Mft1p
FvH4_4g02260	Cluster 4	4.27172	0.169413	0.343728	IAA3,SHY2	AUX/IAA transcriptional regulator family protein
FvH4_4g07110	Cluster 4	9.488	0.383954	0.563014		Ankyrin repeat family protein
FvH4_4g16170	Cluster 4	26.306	9.22056	10.8257		Protein of unknown function (DUF581)
FvH4_4g22300	Cluster 4	3.46803	0.88046	1.05003		ARM repeat superfamily protein
FvH4_4g27260	Cluster 4	10.2124	2.03244	2.64433		alpha/beta-Hydrolases superfamily protein
FvH4_4g27440	Cluster 4	112.532	6.7929	10.8757	AGL22,SVP	K-box region and MADS-box transcription factor family protein
FvH4_4g28230	Cluster 4	2.20594	0.0842964	0.137331		2-oxoglutarate (2OG) and Fe(II)-dependent oxygenase superfamily protein
FvH4_5g04950	Cluster 4	56.6564	13.6024	15.5688
FvH4_5g05310	Cluster 4	25.4343	7.81212	9.4482		Protein of unknown function (DUF1645)
FvH4_5g05490	Cluster 4	103.345	48.8227	54.6967	pat1,TRP1	tryptophan biosynthesis 1
FvH4_5g09901	Cluster 4	29.6024	11.2231	12.8083
FvH4_5g15810	Cluster 4	30.126	7.53047	9.06074		Nodulin-like / Major Facilitator Superfamily protein
FvH4_6g04120	Cluster 4	72.2811	29.5401	33.681
FvH4_6g08760	Cluster 4	39.9415	14.2942	16.4404	FHY2,FRE1,HY8,PHYA	phytochrome A
FvH4_6g09160	Cluster 4	11.6409	1.07006	1.62299		Protein of unknown function (DUF567)
FvH4_6g14600	Cluster 4	34.3343	2.07545	2.81381		Plant protein 1589 of unknown function
FvH4_6g18150	Cluster 4	3.9679	0.826616	0.956541	ATPDR6,PDR6	pleiotropic drug resistance 6
FvH4_6g27400	Cluster 4	563.131	4.16199	19.7275	LSH10	Protein of unknown function (DUF640)
FvH4_6g33000	Cluster 4	4.72223	1.42568	1.62412		Mitochondrial ATP synthase subunit G protein
FvH4_6g38480	Cluster 4	2.19064	0.685822	0.768638	ATGSL07,atgsl7,gsl07	glucan synthase-like 7
FvH4_6g39683	Cluster 4	31.5443	7.66741	9.00372
FvH4_6g44100	Cluster 4	6.67455	3.28604	3.56619	B120	S-locus lectin protein kinase family protein
FvH4_6g49300	Cluster 4	16.2422	1.87395	2.29201
FvH4_6g49540	Cluster 4	10.2432	0.210649	0.347716
FvH4_6g53760	Cluster 4	128.631	15.1905	18.5705		Squamosa promoter-binding protein-like (SBP domain) transcription factor family protein
FvH4_7g07140	Cluster 4	7.39219	2.33395	2.68396	NPC4	non-specific phospholipase C4
FvH4_7g11160	Cluster 4	36.5063	13.8701	15.0308		disease resistance protein (TIR-NBS-LRR class), putative
FvH4_7g15680	Cluster 4	5.78899	0.114981	0.197488	ATCHIA,CHIA	chitinase A
FvH4_7g17380	Cluster 4	24.3236	5.39555	6.27615		basic helix-loop-helix (bHLH) DNA-binding superfamily protein
FvH4_7g23680	Cluster 4	9.71701	1.61529	2.11763		UDP-Glycosyltransferase superfamily protein
FvH4_7g24150	Cluster 4	28.4226	8.23232	10.0842	ATHSPRO2,HSPRO2	ortholog of sugar beet HS1 PRO-1 2
FvH4_7g27620	Cluster 4	7.00608	3.23896	3.5777	ATTPPA	Haloacid dehalogenase-like hydrolase (HAD) superfamily protein
FvH4_7g28790	Cluster 4	6.47161	1.2273	1.52709		F-box family protein with a domain of unknown function (DUF295)
FvH4_1g07790	Cluster 4	18.6475	5.51967	5.89436		Survival protein SurE-like phosphatase/nucleotidase
FvH4_1g15070	Cluster 4	7.79556	2.52069	2.97629
FvH4_1g17470	Cluster 4	3.0797	1.05646	1.15006		Disease resistance protein (CC-NBS-LRR class) family
FvH4_1g20130	Cluster 4	13.8577	0.512979	0.559457		Protein of unknown function, DUF617
FvH4_1g20930	Cluster 4	284.36	130.391	150.182	ANNAT1,ATOXY5,OXY5	annexin 1
FvH4_1g21780	Cluster 4	85.052	19.0793	19.8924
FvH4_1g28731	Cluster 4	10.2025	0.131388	0.0499102		Gibberellin-regulated family protein
FvH4_2g00490	Cluster 4	13.4833	5.03149	5.96339	UREF	urease accessory protein F
FvH4_2g00851	Cluster 4	2.66619	0.69041	0.783113
FvH4_2g01660	Cluster 4	4.61256	0.0752068	0.0798433		Disease resistance-responsive (dirigent-like protein) family protein
FvH4_2g06010	Cluster 4	16.4415	0.259467	0.70735	CYP707A4	cytochrome P450, family 707, subfamily A, polypeptide 4
FvH4_2g08910	Cluster 4	728.177	12.2884	19.5321	ATRL2,MEE3,RSM1	Homeodomain-like superfamily protein
FvH4_2g12120	Cluster 4	2.70578	1.2305	1.5654		leucine-rich repeat transmembrane protein kinase family protein
FvH4_2g32910	Cluster 4	2.62625	0.270916	0.329665		Xanthine/uracil permease family protein
FvH4_2g34300	Cluster 4	101.835	37.5767	42.1457		Remorin family protein
FvH4_2g38080	Cluster 4	16.8218	0.11007	0.534146	atbzip14,FD,FD-1	Basic-leucine zipper (bZIP) transcription factor family protein
FvH4_3g02100	Cluster 4	4.22624	0.0547791	0.0673861
FvH4_3g03690	Cluster 4	5.97713	0.934496	0.943768		Protein of unknown function (DUF594)
FvH4_3g04760	Cluster 4	2.54385	1.10466	1.21308		alpha 1,4-glycosyltransferase family protein
FvH4_3g06030	Cluster 4	20.5385	1.12511	0.687945		glycosyl hydrolase family 17 protein
FvH4_3g12400	Cluster 4	3.24571	1.00829	1.12813		P-loop containing nucleoside triphosphate hydrolases superfamily protein
FvH4_3g13940	Cluster 4	31.2191	11.8138	12.5213		Ca(2)-dependent phospholipid-binding protein (Copine) family
FvH4_3g17850	Cluster 4	7.62829	3.6838	4.10727		Leucine-rich repeat transmembrane protein kinase
FvH4_3g19770	Cluster 4	13.2984	1.71289	1.6734	AtENODL3,ENODL3	early nodulin-like protein 3
FvH4_3g21121	Cluster 4	9.0353	0.937494	1.0517
FvH4_3g24700	Cluster 4	54.1525	0	0	ATC	centroradialis
FvH4_3g28370	Cluster 4	2.7677	0.2197	0.256709		Glycosyl hydrolase superfamily protein
FvH4_3g33900	Cluster 4	34.3404	14.933	16.6349	ATMAPK3,ATMPK3,MPK3	mitogen-activated protein kinase 3
FvH4_4g03132	Cluster 4	4.43324	2.17982	2.30475		Helicase protein with RING/U-box domain
FvH4_4g03740	Cluster 4	2.77334	0.681276	0.731141	ARLIM15,ATDMC1,DMC1	DNA repair (Rad51) family protein
FvH4_4g14800	Cluster 4	8.07172	0.816899	0.856097
FvH4_4g17060	Cluster 4	17.1193	1.62144	1.87458
FvH4_4g21073	Cluster 4	3.06048	0.0560104	0.0692746
FvH4_4g22030	Cluster 4	2.86194	0.895374	0.896784		Protein kinase family protein
FvH4_4g22630	Cluster 4	1.96533	0.677695	0.717417	ORTH2,VIM1	Zinc finger (C3HC4-type RING finger) family protein
FvH4_4g27620	Cluster 4	6.2639	1.89998	1.81964
FvH4_4g27850	Cluster 4	2.74921	0.673355	0.838214
FvH4_4g31660	Cluster 4	11.8321	4.66631	4.90798	AtMYB124,FLP,MYB124	Duplicated homeodomain-like superfamily protein
FvH4_4g34900	Cluster 4	14.7896	7.5879	9.79738		Protein kinase superfamily protein
FvH4_4g35190	Cluster 4	3.13414	0.176365	0.221892
FvH4_4g36490	Cluster 4	30.3334	14.561	16.1274	PQL1,PQL2	PsbQ-like 1
FvH4_5g01240	Cluster 4	27.5792	0.665902	0.280178	AGL19,GL19	AGAMOUS-like 19
FvH4_5g03630	Cluster 4	18.5781	7.30479	7.32011		disease resistance protein (TIR-NBS-LRR class), putative
FvH4_5g05060	Cluster 4	9.96434	1.3886	1.57011		RING/U-box superfamily protein
FvH4_5g06210	Cluster 4	6.66908	0.213982	0.0910411	BG1	beta-1,3-glucanase 1
FvH4_5g07540	Cluster 4	82.2565	1.12667	0.774928	CYP71A26	cytochrome P450, family 71, subfamily A, polypeptide 26
FvH4_5g10880	Cluster 4	19.6787	0.721791	0.356305	CYP78A6	cytochrome P450, family 78, subfamily A, polypeptide 6
FvH4_5g12640	Cluster 4	8.59747	0.276532	0.327655
FvH4_5g15360	Cluster 4	14.763	6.70539	7.17205	emb2191	Cytidine/deoxycytidylate deaminase family protein
FvH4_5g17220	Cluster 4	5.81305	0.0873785	0.0288719		O-methyltransferase family protein
FvH4_5g17290	Cluster 4	3.90341	0.438825	0.318644
FvH4_5g22060	Cluster 4	11.9118	2.0381	2.45515	PYR1,RCAR11	Polyketide cyclase/dehydrase and lipid transport superfamily protein
FvH4_5g23860	Cluster 4	25.7589	5.63013	5.99867	BRX,NLM9	DZC (Disease resistance/zinc finger/chromosome condensation-like region) domain containing protein
FvH4_5g32820	Cluster 4	32.325	5.04741	4.765		Disease resistance protein (CC-NBS-LRR class) family
FvH4_6g05421	Cluster 4	4.58071	0.29649	0.277893
FvH4_6g05700	Cluster 4	54.2576	6.09329	5.28881
FvH4_6g10130	Cluster 4	1.88556	0.36828	0.34103		2-oxoglutarate (2OG) and Fe(II)-dependent oxygenase superfamily protein
FvH4_6g10810	Cluster 4	1.93666	0	0	OSH1	gamma interferon responsive lysosomal thiol (GILT) reductase family protein
FvH4_6g15090	Cluster 4	3.42336	1.17463	1.20344		NB-ARC domain-containing disease resistance protein
FvH4_6g16430	Cluster 4	3.82347	0.318953	0.345449
FvH4_6g24670	Cluster 4	5.48157	0.334254	0.0725706		Pathogenesis-related thaumatin superfamily protein
FvH4_6g30780	Cluster 4	28.1522	1.09795	0.303877	ATGA3OX1,GA3OX1,GA4	gibberellin 3-oxidase 1
FvH4_6g33550	Cluster 4	6.38098	2.02895	2.03246	AtIDD7,IDD7	indeterminate(ID)-domain 7
FvH4_6g35680	Cluster 4	253.473	122.975	131.727		Subtilase family protein
FvH4_6g44700	Cluster 4	2.33658	0.244578	0.197664	CYP71B34	cytochrome P450, family 71, subfamily B, polypeptide 34
FvH4_6g46000	Cluster 4	4.30129	0.810389	0.566939	ATBZIP42,bZIP42	basic leucine-zipper 42
FvH4_6g47680	Cluster 4	5.88565	1.46829	1.56494
FvH4_6g52311	Cluster 4	2.9104	0.167558	0.193672		PQ-loop repeat family protein / transmembrane family protein
FvH4_6g52950	Cluster 4	25.9787	6.61892	6.96556
FvH4_7g00214	Cluster 4	153.732	26.4667	21.8597	BGLU17	beta glucosidase 17
FvH4_7g04750	Cluster 4	45.7734	14.7888	15.6801	UBP12	ubiquitin-specific protease 12
FvH4_7g11151	Cluster 4	36.7126	13.7121	14.9369		Disease resistance protein (TIR-NBS-LRR class) family
FvH4_7g11610	Cluster 4	91.2952	26.5398	26.1622		Leucine-rich repeat protein kinase family protein
FvH4_7g13400	Cluster 4	10.9069	4.33546	4.65257	BAP1	BON association protein 1
FvH4_7g15800	Cluster 4	5.4412	2.35673	2.43326		GDSL-like Lipase/Acylhydrolase superfamily protein
FvH4_7g24370	Cluster 4	347.028	35.4157	20.5044	CBB3,CPD,CYP90,CYP90A,CYP90A1,DWF3	Cytochrome P450 superfamily protein
FvH4_7g26030	Cluster 4	80.4745	9.80032	7.82197	ATWRKY70,WRKY70	WRKY DNA-binding protein 70
FvH4_7g29340	Cluster 4	3.07205	0.856507	0.832813		RNI-like superfamily protein
FvH4_7g30310	Cluster 4	173.005	64.3928	67.7493		Copper transport protein family
FvH4_1g00750	Cluster 4	14.8094	4.90186	4.82986
FvH4_1g00920	Cluster 4	75.9473	35.4597	37.9128		DNAse I-like superfamily protein
FvH4_1g02151	Cluster 4	2.29866	0.631822	0.550248		2-oxoglutarate (2OG) and Fe(II)-dependent oxygenase superfamily protein
FvH4_1g04050	Cluster 4	4.96012	1.08095	0.882911
FvH4_1g04240	Cluster 4	29.118	1.14628	0.576601	AXR2,IAA7	indole-3-acetic acid 7
FvH4_1g09180	Cluster 4	116.241	27.6344	25.7179		Integrase-type DNA-binding superfamily protein
FvH4_1g10661	Cluster 4	4.53729	0.874606	0.647124	ATHCHIB,B-CHI,CHI-B,HCHIB,PR-3,PR3	basic chitinase
FvH4_1g13031	Cluster 4	2.44203	0.321786	0.327552
FvH4_1g15210	Cluster 4	2.05236	0.545249	0.507916		Disease resistance protein (CC-NBS-LRR class) family
FvH4_1g19281	Cluster 4	4.39089	1.40661	1.36185	ATCAD8,CAD-B2,ELI3,ELI3-2	elicitor-activated gene 3-2
FvH4_1g22250	Cluster 4	12.0574	2.08275	1.87775	ATCNGC1,CNGC1	cyclic nucleotide gated channel 1
FvH4_1g26340	Cluster 4	44.9749	8.93521	8.81259	ATRL6,RL6,RSM3	RAD-like 6
FvH4_2g04502	Cluster 4	215.543	28.4927	18.8574
FvH4_2g04680	Cluster 4	356.758	134.982	143.956		Gibberellin-regulated family protein
FvH4_2g07770	Cluster 4	248.241	75.571	71.1224	AHB1,ARATH,GLB1,ATGLB1,GLB1,HB1,NSHB1	hemoglobin 1
FvH4_2g10850	Cluster 4	1.80308	0.369092	0.332276		SAUR-like auxin-responsive protein family
FvH4_2g18461	Cluster 4	2.38022	0.322755	0.204826	SAG101	senescence-associated gene 101
FvH4_2g28740	Cluster 4	24.8604	11.5766	10.4764		Galactosyltransferase family protein
FvH4_2g33550	Cluster 4	29.4647	7.54507	7.73295	CLE26	CLAVATA3/ESR-RELATED 26
FvH4_2g35720	Cluster 4	33.4173	14.0166	14.2059		Plant protein of unknown function (DUF828) with plant pleckstrin homology-like region
FvH4_2g37190	Cluster 4	7.70401	3.14535	3.24229		alpha/beta-Hydrolases superfamily protein
FvH4_2g37830	Cluster 4	17.3647	6.36428	5.89046	ATROPGEF1,ROPGEF1	rho guanyl-nucleotide exchange factor 1
FvH4_3g02481	Cluster 4	3.79964	0.928347	1.15038	BGLU47	beta-glucosidase 47
FvH4_3g02500	Cluster 4	19.1835	8.50622	8.53746	ATGPT1,GPT1	glucose 6-phosphate/phosphate translocator 1
FvH4_3g03481	Cluster 4	6.42524	2.88341	2.89643		S-locus lectin protein kinase family protein
FvH4_3g07230	Cluster 4	29.7287	13.766	14.1458		AAA-type ATPase family protein
FvH4_3g21340	Cluster 4	404.077	123.937	116.513		Calcium-binding EF-hand family protein
FvH4_3g24320	Cluster 4	3.61144	0.922347	0.829267		GDSL-like Lipase/Acylhydrolase superfamily protein
FvH4_3g30420	Cluster 4	7.71472	2.07501	1.66487
FvH4_3g38890	Cluster 4	31.4699	9.00176	9.07516
FvH4_3g41040	Cluster 4	21.4443	10.8465	11.3584		Insulinase (Peptidase family M16) family protein
FvH4_4g09083	Cluster 4	3.94414	0.598926	0.588989
FvH4_4g12490	Cluster 4	161.968	33.1629	22.9202	ATB2	NAD(P)-linked oxidoreductase superfamily protein
FvH4_4g18630	Cluster 4	247.242	117.912	117.579	ATL2,TL2	TOXICOS EN LEVADURA 2
FvH4_4g29370	Cluster 4	10.6339	2.18544	1.43278	BAS1,CYP72B1,CYP734A1	Cytochrome P450 superfamily protein
FvH4_4g30901	Cluster 4	2.73435	0.967486	0.962497	CRK8	cysteine-rich RLK (RECEPTOR-like protein kinase) 8
FvH4_4g32600	Cluster 4	12.8957	4.41715	3.99703	AST91,SULTR3;3	sulfate transporter 91
FvH4_4g33480	Cluster 4	14.0101	6.90419	7.35123
FvH4_4g33900	Cluster 4	7.12671	1.22075	0.965554	PCR2	PLANT CADMIUM RESISTANCE 2
FvH4_5g00150	Cluster 4	8.15776	2.09682	1.72717	ATNRT1,B-1,CHL1,CHL1-1,NRT1,NRT1.1	nitrate transporter 1.1
FvH4_5g08060	Cluster 4	16.2702	2.5718	1.95996	CML38	calmodulin-like 38
FvH4_5g10590	Cluster 4	3.15117	0.299342	0.111867	ATP5	delta subunit of Mt ATP synthase
FvH4_5g12460	Cluster 4	3.18648	0.307721	0.0202156		PLAC8 family protein
FvH4_5g17670	Cluster 4	121.242	32.6685	25.3236	KNATM	KNOX Arabidopsis thaliana meinox
FvH4_5g21680	Cluster 4	3.13667	1.29522	1.18723
FvH4_5g21990	Cluster 4	14.628	5.201	4.80585
FvH4_5g26600	Cluster 4	78.2892	30.0514	28.0054
FvH4_5g27210	Cluster 4	6.38739	3.23398	3.34791	BRL2,VH1	BRI1-like 2
FvH4_5g32810	Cluster 4	100.609	19.3248	13.0749		Disease resistance protein (CC-NBS-LRR class) family
FvH4_5g39060	Cluster 4	75.033	25.2749	23.0882	AtWRKY35,MEE24,WRKY35	WRKY DNA-binding protein 35
FvH4_6g06050	Cluster 4	22.9951	12.0114	11.6699
FvH4_6g13090	Cluster 4	11.4676	4.87926	4.75169	LHW	transcription factor-related
FvH4_6g17651	Cluster 4	4.46761	1.1557	1.10399
FvH4_6g18100	Cluster 4	58.1681	18.7896	17.816
FvH4_6g20520	Cluster 4	3.09267	0.595432	0.447995
FvH4_6g24680	Cluster 4	6.14213	0.927829	0.498936	BG1	beta-1,3-glucanase 1
FvH4_6g35780	Cluster 4	33.1667	15.0183	15.7031
FvH4_6g39810	Cluster 4	69.3056	7.14619	1.57928	AtUGT85A3,UGT85A3	UDP-glucosyl transferase 85A3
FvH4_6g40250	Cluster 4	6.90263	3.54559	3.56991
FvH4_6g49320	Cluster 4	23.1918	5.69154	4.47252
FvH4_6g50160	Cluster 4	57.9952	15.6316	12.9288	SAG101	senescence-associated gene 101
FvH4_6g53741	Cluster 4	2.65804	0.37939	0.271	AGL7,AP1	K-box region and MADS-box transcription factor family protein
FvH4_7g01160	Cluster 4	33.3221	15.0123	14.8404	ATCHS,CHS,TT4	Chalcone and stilbene synthase family protein
FvH4_7g10850	Cluster 4	18.2473	2.84028	1.84373	cycp3;1	cyclin p3;1
FvH4_7g15370	Cluster 4	7.08405	3.30592	3.0025	PANB2	Phosphoenolpyruvate carboxylase family protein
FvH4_7g16150	Cluster 4	69.4381	33.1055	31.2427	ATWRKY46,WRKY46	WRKY DNA-binding protein 46
FvH4_7g21020	Cluster 4	1.97867	0.808607	0.741266		Phosphatidylinositol N-acetyglucosaminlytransferase subunit P-related
FvH4_7g31860	Cluster 4	13.3772	6.86949	7.17402	ATSPDS3,SPDS3,SPMS	spermidine synthase 3
FvH4_7g32790	Cluster 4	75.8937	34.4366	33.0457	iqd17	IQ-domain 17
FvH4_7g32980	Cluster 4	102.421	35.4453	30.5458	DMR6	2-oxoglutarate (2OG) and Fe(II)-dependent oxygenase superfamily protein
FvH4_7g34110	Cluster 4	30.3977	5.58994	2.5593
FvH4_1g07041	Cluster 4	12.3369	3.1353	2.2192		Toll-Interleukin-Resistance (TIR) domain family protein
FvH4_1g09300	Cluster 4	114.887	13.9395	6.03364		SAUR-like auxin-responsive protein family
FvH4_1g11950	Cluster 4	9.91519	3.16935	2.45863	AtGH9B5,GH9B5	glycosyl hydrolase 9B5
FvH4_1g19620	Cluster 4	61.8767	24.256	22.812	ATNIC1,NIC1	nicotinamidase 1
FvH4_1g29930	Cluster 4	33.2694	10.6455	8.21146		ARM repeat superfamily protein
FvH4_2g01150	Cluster 4	79.9016	28.3489	25.6741		SBP (S-ribonuclease binding protein) family protein
FvH4_2g16180	Cluster 4	9.05681	1.89142	1.38258	anac036,NAC036	NAC domain containing protein 36
FvH4_2g21310	Cluster 4	327.026	40.9766	1.88098	LSH3	Protein of unknown function (DUF640)
FvH4_2g28370	Cluster 4	23.3263	9.3586	8.55703
FvH4_2g35010	Cluster 4	46.9562	24.7057	26.2341	ATMYB73,MYB73	myb domain protein 73
FvH4_2g35410	Cluster 4	56.8702	19.419	15.9741		Polyketide cyclase/dehydrase and lipid transport superfamily protein
FvH4_2g37710	Cluster 4	39.1876	21.0839	20.1497		Zinc-binding alcohol dehydrogenase family protein
FvH4_2g38920	Cluster 4	190.015	77.5407	74.4974	WAT1	Walls Are Thin 1
FvH4_2g40850	Cluster 4	7.4512	2.20577	1.64797		C2H2 and C2HC zinc fingers superfamily protein
FvH4_3g04781	Cluster 4	35.349	15.2393	14.0586		alpha/beta-Hydrolases superfamily protein
FvH4_3g11120	Cluster 4	933.123	194.689	100.38	LSH6	Protein of unknown function (DUF640)
FvH4_3g15730	Cluster 4	4.57818	1.92752	1.80396		S-locus lectin protein kinase family protein
FvH4_3g17651	Cluster 4	11.899	3.32983	2.00156
FvH4_3g21130	Cluster 4	20.7684	10.4825	10.0603		Wound-responsive family protein
FvH4_3g21890	Cluster 4	109.421	53.4129	49.0844	NDR1	Late embryogenesis abundant (LEA) hydroxyproline-rich glycoprotein family
FvH4_3g23410	Cluster 4	10.0144	4.01871	3.58826		O-Glycosyl hydrolases family 17 protein
FvH4_3g24070	Cluster 4	19.5013	10.3996	10.1806		CCCH-type zinc fingerfamily protein with RNA-binding domain
FvH4_3g29900	Cluster 4	115.436	36.3158	28.8914	ATPSK3,PSK1,PSK3	PHYTOSULFOKINE 3 PRECURSOR
FvH4_3g33042	Cluster 4	4.98859	1.71814	1.41025		F-box/RNI-like superfamily protein
FvH4_3g45301	Cluster 4	3.82279	0.53997	0.0246951		RNA-binding KH domain-containing protein
FvH4_4g08000	Cluster 4	3.78242	0.965208	0.63012		Ribulose bisphosphate carboxylase (small chain) family protein
FvH4_4g12240	Cluster 4	141.819	49.6871	41.9611		PHD finger protein
FvH4_4g14040	Cluster 4	5.74229	2.86647	2.67258	SQE1,XF1	FAD/NAD(P)-binding oxidoreductase family protein
FvH4_4g14740	Cluster 4	75.6302	34.1899	33.7139	AILP1,ATAILP1	Aluminium induced protein with YGL and LRDR motifs
FvH4_4g27040	Cluster 4	4.95205	2.02646	1.81113
FvH4_4g28010	Cluster 4	12.3062	2.828	1.89045	DOT5,WIP6	C2H2-like zinc finger protein
FvH4_4g34050	Cluster 4	14.0002	6.70138	6.05921		Protein kinase superfamily protein
FvH4_4g34370	Cluster 4	293.406	124.792	107.146		Protein of unknown function (DUF1645)
FvH4_5g05330	Cluster 4	34.2863	11.8449	9.67302	DOF5.6,HCA2	Dof-type zinc finger DNA-binding family protein
FvH4_5g05740	Cluster 4	25.9968	14.24	13.5388		Protein of Unknown Function (DUF239)
FvH4_5g10560	Cluster 4	98.6902	32.4836	28.1822
FvH4_5g11180	Cluster 4	15.0407	7.61824	6.87174
FvH4_5g13111	Cluster 4	2.30184	0.937941	1.02482	SPPA,SPPA1	signal peptide peptidase
FvH4_5g16240	Cluster 4	160.427	41.8888	28.985	ARR5,ATRR2,IBC6,RR5	response regulator 5
FvH4_5g26230	Cluster 4	22.7336	8.05004	6.20931	AHL29,SOB3	Predicted AT-hook DNA-binding family protein
FvH4_5g31671	Cluster 4	3.12589	0.108536	0.808468		NAD(P)-binding Rossmann-fold superfamily protein
FvH4_5g32430	Cluster 4	5.95832	3.11584	3.06785		NB-ARC domain-containing disease resistance protein
FvH4_6g01630	Cluster 4	7.31879	3.64743	3.27998	PFT1	phytochrome and flowering time regulatory protein (PFT1)
FvH4_6g04430	Cluster 4	3.10314	1.14623	0.985334		FRIGIDA-like protein
FvH4_6g04530	Cluster 4	28.173	14.5857	12.7091
FvH4_6g12160	Cluster 4	4.57531	0.993294	0.39816		Cysteine proteinases superfamily protein
FvH4_6g29880	Cluster 4	15.3595	6.15181	5.77064		HSP20-like chaperones superfamily protein
FvH4_6g33070	Cluster 4	25.8904	5.20208	1.6465	ATMRP6,MRP6	multidrug resistance-associated protein 6
FvH4_6g35050	Cluster 4	19.289	6.56638	5.16147		inter-alpha-trypsin inhibitor heavy chain-related
FvH4_7g12700	Cluster 4	129.175	29.751	9.93968	AGL20,ATSOC1,SOC1	AGAMOUS-like 20
FvH4_7g32800	Cluster 4	46.5823	15.0423	10.867	HSP21	heat shock protein 21
FvH4_1g11071	Cluster 4	18.8	9.87544	8.90645
FvH4_1g12490	Cluster 4	3.41992	0.55366	0.131865		Peroxidase superfamily protein
FvH4_1g15380	Cluster 4	3.56784	1.40146	1.05221		Disease resistance protein (CC-NBS-LRR class) family
FvH4_1g15500	Cluster 4	2.14044	0.877344	0.701845		Disease resistance protein (CC-NBS-LRR class) family
FvH4_1g16050	Cluster 4	6.39524	2.13664	1.66313		Protein of unknown function (DUF1685)
FvH4_1g19142	Cluster 4	2.11686	0.529511	0.212817		RNA ligase/cyclic nucleotide phosphodiesterase family protein
FvH4_1g28680	Cluster 4	35.3653	6.74823	2.1696		Calcium-dependent lipid-binding (CaLB domain) family protein
FvH4_2g00810	Cluster 4	4.12718	2.08812	1.91226
FvH4_2g03880	Cluster 4	18.4601	13.5819	11.9204
FvH4_2g05700	Cluster 4	2.58784	1.14792	0.759645	UGT73B5	UDP-glucosyl transferase 73B5
FvH4_2g17570	Cluster 4	2.62361	1.18684	1.06195		Integral membrane HRF1 family protein
FvH4_2g39520	Cluster 4	10.5599	5.55888	5.29057	DFR,M318,TT3	dihydroflavonol 4-reductase
FvH4_2g39850	Cluster 4	29.6682	14.8897	12.9161		Sec14p-like phosphatidylinositol transfer family protein
FvH4_2g40540	Cluster 4	7.66284	4.11034	3.74061		Protein kinase protein with adenine nucleotide alpha hydrolases-like domain
FvH4_3g08900	Cluster 4	9.3121	2.80984	1.59213	OBP4	OBF binding protein 4
FvH4_3g12620	Cluster 4	119.713	54.4487	46.4027
FvH4_3g38660	Cluster 4	22.4107	12.5756	11.771	ATPLC4,PLC4	phosphatidylinositol-speciwc phospholipase C4
FvH4_3g44250	Cluster 4	37.8654	18.7331	16.6177
FvH4_4g03323	Cluster 4	8.10452	4.17063	3.63704		2-oxoglutarate (2OG) and Fe(II)-dependent oxygenase superfamily protein
FvH4_4g04310	Cluster 4	9.50015	5.22592	5.03749		Cyclopropane-fatty-acyl-phospholipid synthase
FvH4_4g31170	Cluster 4	3.11928	0.733318	0.350511		Ribosomal L18p/L5e family protein
FvH4_5g04610	Cluster 4	48.1804	13.8069	5.34408
FvH4_5g12400	Cluster 4	9.72466	4.25939	3.62584	CYP75B1,D501,TT7	Cytochrome P450 superfamily protein
FvH4_5g34194	Cluster 4	14.5895	7.90166	7.3185		Disease resistance protein (TIR-NBS-LRR class)
FvH4_6g13290	Cluster 4	5.64506	1.90047	1.02376		2-oxoglutarate (2OG) and Fe(II)-dependent oxygenase superfamily protein
FvH4_6g48210	Cluster 4	100.418	33.7019	22.6371	AT-EXP1,ATEXP1,ATEXPA1,ATHEXP,ALPHA,1.2,EXP1,EXPA1	expansin A1
FvH4_7g23710	Cluster 4	333.721	137.659	99.2789		HSP20-like chaperones superfamily protein
FvH4_1g03760	Cluster 4	319.03	106.862	63.6508		early nodulin-related
FvH4_1g20160	Cluster 4	26.8027	9.32293	5.88582		basic helix-loop-helix (bHLH) DNA-binding superfamily protein
FvH4_2g13190	Cluster 4	22.4613	11.2848	9.76053		Protein kinase superfamily protein
FvH4_2g34030	Cluster 4	14.5452	6.7883	5.78945	WOX4	WUSCHEL related homeobox 4
FvH4_2g35040	Cluster 4	11.2608	6.10641	5.31901
FvH4_2g39400	Cluster 4	3.40105	1.60035	1.2705		basic helix-loop-helix (bHLH) DNA-binding superfamily protein
FvH4_3g07790	Cluster 4	3.19385	1.24099	0.872849		Dof-type zinc finger DNA-binding family protein
FvH4_4g07400	Cluster 4	5.44753	2.19323	1.53057
FvH4_4g26011	Cluster 4	110.955	55.9232	46.2701		GDSL-like Lipase/Acylhydrolase superfamily protein
FvH4_5g07260	Cluster 4	9.93458	4.55728	3.57025		GDSL-like Lipase/Acylhydrolase superfamily protein
FvH4_6g04580	Cluster 4	75.6299	42.6232	38.5618
FvH4_6g29870	Cluster 4	44.0264	13.3653	6.025
FvH4_7g08930	Cluster 4	4.82906	2.05185	1.46183		Protein kinase superfamily protein
FvH4_7g22630	Cluster 4	7.924	2.27977	0.850354	CYP71A22	cytochrome P450, family 71, subfamily A, polypeptide 22
FvH4_1g03100	Cluster 4	156.994	76.1416	57.5113
FvH4_2g23620	Cluster 4	38.9692	17.2838	12.4272		Protein of unknown function (DUF3049)
FvH4_3g12891	Cluster 4	50.062	19.0468	11.8396	ZIP1	zinc transporter 1 precursor
FvH4_3g29710	Cluster 4	14.228	6.52279	5.11244	ATPDR6,PDR6	pleiotropic drug resistance 6
FvH4_3g36410	Cluster 4	161.633	84.5749	69.8671	ATEXP4,ATEXPA4,ATHEXP,ALPHA,1.6,EXPA4	expansin A4
FvH4_3g42040	Cluster 4	5.86358	3.37452	2.95699	ATSBT5.4,SBT5.4	Subtilase family protein
FvH4_4g35580	Cluster 4	5.67436	2.80399	1.9449	ATGSTU18,GST29,GSTU18	glutathione S-transferase TAU 18
FvH4_5g11900	Cluster 4	3.60183	1.16404	0.565771		Plant protein of unknown function (DUF247)
FvH4_6g05540	Cluster 4	77.3664	21.6468	6.2879	HAP5C,NF-YC9	nuclear factor Y, subunit C9
FvH4_6g12730	Cluster 4	43.2464	22.9173	18.3576
FvH4_6g49810	Cluster 4	40.886	22.045	18.5101	GATL10	galacturonosyltransferase-like 10
FvH4_6g51300	Cluster 4	3.78688	1.1555	0.463856	LBD25	LOB domain-containing protein 25
FvH4_2g08550	Cluster 4	110.384	48.7924	35.0235
FvH4_3g42390	Cluster 4	14.0515	8.16268	7.09906	CPR30	F-box and associated interaction domains-containing protein
FvH4_4g26140	Cluster 4	134.37	45.4929	22.6895
FvH4_7g28740	Cluster 4	35.3639	8.98965	1.26233	AGL42	AGAMOUS-like 42
FvH4_2g01430	Cluster 4	237.16	126.257	106.113	ADF5,ATADF5	actin depolymerizing factor 5
FvH4_4g16670	Cluster 4	4.43706	1.35851	0.449375	PPDK	pyruvate orthophosphate dikinase
FvH4_4g32180	Cluster 4	65.9457	29.835	20.9935
FvH4_6g10140	Cluster 4	23.1762	7.66935	3.0747	ATOFP4,OFP4	ovate family protein 4
FvH4_1g09090	Cluster 5	53.0779	19.5003	49.6607		Protein of unknown function (DUF581)
FvH4_3g00840	Cluster 5	6.72634	1.65028	6.77975	XTH23,XTR6	xyloglucan endotransglycosylase 6
FvH4_3g05900	Cluster 5	8.98494	2.28786	6.60747
FvH4_3g13840	Cluster 5	17.1469	4.895	16.2715	ECT8	evolutionarily conserved C-terminal region 8
FvH4_3g22180	Cluster 5	26.7821	12.0528	22.4594		basic helix-loop-helix (bHLH) DNA-binding superfamily protein
FvH4_3g23250	Cluster 5	14.3417	5.04279	11.1067	ATRTL2,RTL2	RNAse THREE-like protein 2
FvH4_3g36584	Cluster 5	28.2213	12.4954	26.6041	PYM,UVI4	uv-b-insensitive 4
FvH4_3g43890	Cluster 5	15.5156	6.68381	12.8672		NB-ARC domain-containing disease resistance protein
FvH4_3g44391	Cluster 5	4.63687	1.89353	4.06188		disease resistance protein (TIR-NBS-LRR class), putative
FvH4_4g09521	Cluster 5	77.5252	33.4135	67.6542
FvH4_4g15662	Cluster 5	3.86469	0.553934	2.91712
FvH4_4g27840	Cluster 5	41.0355	14.3512	32.0123
FvH4_6g03040	Cluster 5	18.8926	7.34401	15.5861
FvH4_6g06441	Cluster 5	53.7004	22.0474	44.5846	RECQSIM	RECQ helicase SIM
FvH4_6g25550	Cluster 5	25.5751	10.5503	21.5964
FvH4_6g32030	Cluster 5	7.32269	2.39049	5.52636	TINY2	Integrase-type DNA-binding superfamily protein
FvH4_6g38782	Cluster 5	13.8759	5.10029	11.0635		Protein of unknown function (DUF3414)
FvH4_6g48770	Cluster 5	17.7401	6.9147	14.7476		HXXXD-type acyl-transferase family protein
FvH4_7g10440	Cluster 5	15.0284	5.48538	11.8901		WRKY family transcription factor
FvH4_7g30620	Cluster 5	25.4364	9.48907	21.3746		P-loop containing nucleoside triphosphate hydrolases superfamily protein
FvH4_1g18530	Cluster 5	51.5689	21.0071	53.1146	HAT22	Homeobox-leucine zipper protein family
FvH4_1g23542	Cluster 5	9.61948	3.90138	8.9015	ADG1,APS1	ADP glucose pyrophosphorylase 1
FvH4_1g27650	Cluster 5	53.0617	20.2527	46.5264	ARF8,ATARF8	auxin response factor 8
FvH4_2g00300	Cluster 5	23.0853	10.0367	21.8324		RING/U-box superfamily protein
FvH4_2g03330	Cluster 5	30.3613	13.6311	28.5947	ATPRP40A,PRP40A	pre-mRNA-processing protein 40A
FvH4_2g03570	Cluster 5	51.2973	18.6536	42.6302	scpl1	serine carboxypeptidase-like 1
FvH4_2g04940	Cluster 5	31.8424	12.2654	29.9653	ACLA-2	ATP-citrate lyase A-2
FvH4_2g05090	Cluster 5	297.748	119.709	250	UGT84A1	UDP-Glycosyltransferase superfamily protein
FvH4_2g05900	Cluster 5	16.0694	6.83696	15.4672	ABF4,AREB2	ABRE binding factor 4
FvH4_2g06880	Cluster 5	32.0939	9.06011	27.0168		Homeodomain-like superfamily protein
FvH4_2g12270	Cluster 5	15.643	4.57634	12.5636
FvH4_2g12820	Cluster 5	19.6579	7.96197	19.9505	LAC14	laccase 14
FvH4_2g16370	Cluster 5	5.8016	1.36028	4.52261		O-fucosyltransferase family protein
FvH4_2g19870	Cluster 5	17.417	7.27627	14.486		RNI-like superfamily protein
FvH4_2g25980	Cluster 5	18.1021	2.49072	16.4162		Plant invertase/pectin methylesterase inhibitor superfamily
FvH4_2g26160	Cluster 5	17.887	8.05045	16.2818		P-loop nucleoside triphosphate hydrolases superfamily protein with CH (Calponin Homology) domain
FvH4_2g32000	Cluster 5	25.8794	3.77138	21.3269	ATCBL10,CBL10,SCABP8	calcineurin B-like protein 10
FvH4_2g32060	Cluster 5	39.3852	12.6808	32.7643	ATH1	homeobox gene 1
FvH4_2g37381	Cluster 5	32.9475	8.70643	28.0157	SBE2.2	starch branching enzyme 2.2
FvH4_2g37540	Cluster 5	20.977	8.73076	19.6115		O-fucosyltransferase family protein
FvH4_2g40620	Cluster 5	6.94137	1.5372	6.25824	ATS,KAN4	Homeodomain-like superfamily protein
FvH4_3g01921	Cluster 5	1.9502	0.562549	1.84396	SNL1	SIN3-like 1
FvH4_3g02590	Cluster 5	111.24	42.5365	97.5336
FvH4_3g03110	Cluster 5	27.382	11.3629	29.4503
FvH4_3g04940	Cluster 5	7.98056	0.274874	7.34725		Tetraspanin family protein
FvH4_3g06000	Cluster 5	237.875	71.2072	188.282		basic helix-loop-helix (bHLH) DNA-binding superfamily protein
FvH4_3g19190	Cluster 5	5.42246	1.38709	4.10546
FvH4_3g23420	Cluster 5	4.36084	1.53781	3.55019	BGLU11	beta glucosidase 11
FvH4_3g23510	Cluster 5	16.6755	3.20629	13.9599
FvH4_3g25020	Cluster 5	83.1684	34.3365	70.754	AGL1,SHP1	K-box region and MADS-box transcription factor family protein
FvH4_3g28450	Cluster 5	2.2165	0.63974	1.60871
FvH4_3g30320	Cluster 5	42.9646	9.72746	38.7806		Bifunctional inhibitor/lipid-transfer protein/seed storage 2S albumin superfamily protein
FvH4_3g30430	Cluster 5	50.1355	20.235	41.5917	ACL5	S-adenosyl-L-methionine-dependent methyltransferases superfamily protein
FvH4_3g35940	Cluster 5	23.5748	7.09431	21.0025
FvH4_3g36251	Cluster 5	35.8852	9.64507	35.6354		XH/XS domain-containing protein
FvH4_3g40413	Cluster 5	12.522	5.57084	10.9192		Insulinase (Peptidase family M16) family protein
FvH4_3g43660	Cluster 5	6.9812	2.50016	6.28182		NB-ARC domain-containing disease resistance protein
FvH4_3g43881	Cluster 5	18.8043	6.56266	16.4294
FvH4_3g45643	Cluster 5	15.6701	7.02151	13.4492		NB-ARC domain-containing disease resistance protein
FvH4_4g01760	Cluster 5	5.71735	1.82094	5.66846	CML11	calmodulin-like 11
FvH4_4g02162	Cluster 5	10.137	2.66674	10.4456		acylaminoacyl-peptidase-related
FvH4_4g03070	Cluster 5	25.739	11.0569	24.5596
FvH4_4g06480	Cluster 5	29.0696	10.1405	23.6576	scpl3	serine carboxypeptidase-like 3
FvH4_4g07930	Cluster 5	60.7101	23.3951	60.624	scpl18	serine carboxypeptidase-like 18
FvH4_4g08191	Cluster 5	19.0238	8.74478	17.7727	CRK8	cysteine-rich RLK (RECEPTOR-like protein kinase) 8
FvH4_4g12350	Cluster 5	23.0566	9.31143	19.5482		Leucine-rich receptor-like protein kinase family protein
FvH4_4g15300	Cluster 5	5.48633	2.26941	5.09805		Major facilitator superfamily protein
FvH4_4g16761	Cluster 5	2.24451	0.585044	1.60629		Protein kinase superfamily protein
FvH4_4g17780	Cluster 5	4.61773	1.49294	4.49375
FvH4_4g25110	Cluster 5	5.27876	0.969413	5.29046		Pectate lyase family protein
FvH4_4g25360	Cluster 5	18.2352	8.28461	15.4877	emb1745	embryo defective 1745
FvH4_4g26051	Cluster 5	8.16917	1.01778	5.42075	MENG	S-adenosyl-L-methionine-dependent methyltransferases superfamily protein
FvH4_4g28470	Cluster 5	24.5269	9.73985	23.636		Protein kinase superfamily protein
FvH4_4g29930	Cluster 5	6.22308	2.34417	5.00116		NB-ARC domain-containing disease resistance protein
FvH4_4g30990	Cluster 5	24.7523	10.0536	20.1318		Arabinanase/levansucrase/invertase
FvH4_4g31970	Cluster 5	16.9638	7.48914	15.924	PLP,PLPA,PLPB,PLPC	PAS/LOV protein B
FvH4_4g33281	Cluster 5	4.3154	1.29046	3.04423		Protein kinase family protein with leucine-rich repeat domain
FvH4_4g35411	Cluster 5	5.01417	1.68368	4.02043		transmembrane receptors;ATP binding
FvH4_4g35890	Cluster 5	12.2387	4.95602	10.9232	ATNHX7,ATSOS1,SOS1	sodium proton exchanger, putative (NHX7) (SOS1)
FvH4_5g01530	Cluster 5	11.9973	4.06294	8.99525	SLK2	SEUSS-like 2
FvH4_5g03800	Cluster 5	7.0616	1.4468	7.15846	ATMRP14,MRP14	multidrug resistance-associated protein 14
FvH4_5g05280	Cluster 5	112.124	36.1877	98.8939	ATMYB66,MYB66,WER,WER1	myb domain protein 66
FvH4_5g06576	Cluster 5	2.5645	0.514697	2.50496	CYP71A25	cytochrome P450, family 71, subfamily A, polypeptide 25
FvH4_5g12280	Cluster 5	7.08777	2.21782	6.25845
FvH4_5g15780	Cluster 5	17.4348	6.78299	14.5961		zinc ion binding
FvH4_5g19040	Cluster 5	60.1696	22.1375	50.5661		Nodulin MtN21 /EamA-like transporter family protein
FvH4_5g21720	Cluster 5	2.75386	0.875548	2.42944	PIRL4	plant intracellular ras group-related LRR 4
FvH4_5g22820	Cluster 5	46.8318	19.1786	42.6724
FvH4_5g23660	Cluster 5	46.0463	18.44	43.7012		Homeodomain-like superfamily protein
FvH4_5g25350	Cluster 5	5.7585	1.88815	4.61936		Pentatricopeptide repeat (PPR) superfamily protein
FvH4_5g27140	Cluster 5	46.6973	19.2054	46.2994	ATFRO7,FRO7	ferric reduction oxidase 7
FvH4_5g29010	Cluster 5	11.8811	6.00582	12.1619		Plant calmodulin-binding protein-related
FvH4_5g30300	Cluster 5	18.0598	7.70282	16.4402	ATCTC1,CTC1	conserved telomere maintenance component 1
FvH4_5g30740	Cluster 5	5.78251	2.21042	5.65073
FvH4_5g34250	Cluster 5	7.37956	2.65751	5.77202		Disease resistance protein (TIR-NBS-LRR class) family
FvH4_5g35250	Cluster 5	37.082	13.592	35.0884		zinc ion binding;DNA binding
FvH4_5g35760	Cluster 5	5.25346	1.34643	4.13073	LAC14	laccase 14
FvH4_5g37690	Cluster 5	13.4572	4.60145	11.2387		VQ motif-containing protein
FvH4_5g38230	Cluster 5	20.0313	8.68185	18.1685
FvH4_6g01760	Cluster 5	46.1772	11.5134	47.2442
FvH4_6g03950	Cluster 5	33.3946	10.1882	26.1166		P-loop containing nucleoside triphosphate hydrolases superfamily protein
FvH4_6g04470	Cluster 5	14.046	2.10253	9.37312	EMB3004,MEE32	dehydroquinate dehydratase, putative / shikimate dehydrogenase, putative
FvH4_6g05051	Cluster 5	9.37074	3.09254	7.10665		Major facilitator superfamily protein
FvH4_6g05060	Cluster 5	9.05775	3.1197	8.25439	ERD6	Major facilitator superfamily protein
FvH4_6g05092	Cluster 5	9.2475	2.27378	7.47268	SFP1	Major facilitator superfamily protein
FvH4_6g06090	Cluster 5	7.47048	2.14763	5.95169	ATLOX1,LOX1	lipoxygenase 1
FvH4_6g06440	Cluster 5	6.83306	2.75752	5.56575	RECQSIM	RECQ helicase SIM
FvH4_6g07150	Cluster 5	10.4528	3.0923	7.60014		Calmodulin-binding protein
FvH4_6g07160	Cluster 5	5.28031	2.03619	4.77967
FvH4_6g09120	Cluster 5	5.69026	1.29511	4.76423		Protein of unknown function (DUF567)
FvH4_6g12260	Cluster 5	36.7414	15.252	29.4646		O-fucosyltransferase family protein
FvH4_6g15060	Cluster 5	44.2203	19.2655	40.1194	APRR7,PRR7	pseudo-response regulator 7
FvH4_6g17080	Cluster 5	5.91973	1.76799	6.17784	UGT73D1	UDP-glucosyl transferase 73D1
FvH4_6g18830	Cluster 5	12.6803	3.14077	10.2613	ACA1,ATACA1,CAH1	alpha carbonic anhydrase 1
FvH4_6g21081	Cluster 5	22.9218	10.3202	19.4255
FvH4_6g28840	Cluster 5	14.1153	1.62149	13.3327		C2H2 and C2HC zinc fingers superfamily protein
FvH4_6g36241	Cluster 5	40.1438	16.7688	34.6753	AHA10	autoinhibited H(+)-ATPase isoform 10
FvH4_6g36960	Cluster 5	36.7313	12.117	34.7167	LPAT2	lysophosphatidyl acyltransferase 2
FvH4_6g38350	Cluster 5	6.25691	2.09436	5.34046	ATKCO6,ATTPK3,KCO6,TPK3	Ca2+ activated outward rectifying K+ channel 6
FvH4_6g39571	Cluster 5	18.1164	5.87907	17.2663
FvH4_6g42450	Cluster 5	34.0429	8.03473	30.9662		Major facilitator superfamily protein
FvH4_6g50090	Cluster 5	2.55522	0.700855	1.90306		RING/U-box superfamily protein with ARM repeat domain
FvH4_6g51092	Cluster 5	8.37365	2.57733	8.15546		Cytochrome c oxidase subunit Vc family protein
FvH4_6g51100	Cluster 5	4.39269	1.65613	3.89335	MER3,RCK	ATP binding;ATP-dependent helicases;DNA helicases
FvH4_6g51110	Cluster 5	66.2795	29.5729	57.4874		Histidine kinase-, DNA gyrase B-, and HSP90-like ATPase family protein
FvH4_6g52090	Cluster 5	3.42946	1.26702	3.22259		F-box and associated interaction domains-containing protein
FvH4_7g01230	Cluster 5	19.7217	6.88709	16.2571
FvH4_7g05740	Cluster 5	5.80395	1.81807	4.44522		Major facilitator superfamily protein
FvH4_7g06403	Cluster 5	6.64964	2.33207	5.76597		RNA-binding (RRM/RBD/RNP motifs) family protein
FvH4_7g12282	Cluster 5	14.2252	3.33756	11.2344	CYP704A2	cytochrome P450, family 704, subfamily A, polypeptide 2
FvH4_7g18210	Cluster 5	5.21807	2.86553	5.33948	anac028,NAC028	NAC domain containing protein 28
FvH4_7g18250	Cluster 5	7.4268	2.20732	5.84697	anac096,NAC096	NAC domain containing protein 96
FvH4_7g23940	Cluster 5	18.2649	6.51644	14.2517		HAD superfamily, subfamily IIIB acid phosphatase
FvH4_7g24310	Cluster 5	18.8618	9.91346	15.9338
FvH4_7g26071	Cluster 5	18.6957	8.13588	18.5663		Disease resistance protein (TIR-NBS-LRR class) family
FvH4_7g26140	Cluster 5	11.3779	4.3102	9.72969
FvH4_7g27132	Cluster 5	10.6951	3.05186	9.1602		GroES-like zinc-binding alcohol dehydrogenase family protein
FvH4_7g27643	Cluster 5	25.6203	8.70605	25.295	ATSMC2	Structural maintenance of chromosomes (SMC) family protein
FvH4_7g28480	Cluster 5	19.0684	7.118	15.7154	ATFUC1,FUC1	alpha-L-fucosidase 1
FvH4_7g32110	Cluster 5	2.63017	0.538663	1.67674		Cysteine proteinases superfamily protein
FvH4_7g33260	Cluster 5	9.50824	3.88454	8.66769		DNA mismatch repair protein MutS, type 2
FvH4_1g02150	Cluster 5	4.67459	0.922699	3.67206		2-oxoglutarate (2OG) and Fe(II)-dependent oxygenase superfamily protein
FvH4_1g09110	Cluster 5	16.3477	7.32443	15.2123		disease resistance protein (TIR-NBS-LRR class), putative
FvH4_1g12660	Cluster 5	8.6177	2.97635	8.52914		UDP-Glycosyltransferase superfamily protein
FvH4_1g13970	Cluster 5	54.6237	12.7435	38.8704		UDP-Glycosyltransferase superfamily protein
FvH4_1g16620	Cluster 5	5.07958	2.06238	4.13117		disease resistance protein (TIR-NBS-LRR class)
FvH4_1g19480	Cluster 5	14.4973	5.9813	11.6377		UDP-Glycosyltransferase superfamily protein
FvH4_1g22971	Cluster 5	7.81541	3.44523	7.48851		tRNAHis guanylyltransferase
FvH4_1g23082	Cluster 5	38.008	13.4281	35.9038	ATWRKY13,WRKY13	WRKY DNA-binding protein 13
FvH4_1g24670	Cluster 5	9.30295	1.79412	7.00582		Copine (Calcium-dependent phospholipid-binding protein) family
FvH4_1g29190	Cluster 5	47.8396	19.4694	37.7602		cytochrome c biogenesis protein family
FvH4_2g06300	Cluster 5	25.1565	9.21168	19.5584		AP2/B3-like transcriptional factor family protein
FvH4_2g12201	Cluster 5	16.5483	4.67176	13.1063
FvH4_2g30780	Cluster 5	19.1597	8.10393	15.3553	ATDCL3,DCL3	dicer-like 3
FvH4_2g33452	Cluster 5	10.9152	3.64693	8.36284		RING/U-box superfamily protein
FvH4_3g03450	Cluster 5	6.83718	1.93891	4.83355	SD1-29	S-domain-1 29
FvH4_3g14116	Cluster 5	9.21451	2.21395	6.5308	ATKS,ATKS1,GA2,KS,KS1	Terpenoid cyclases/Protein prenyltransferases superfamily protein
FvH4_3g22740	Cluster 5	10.7983	1.91707	6.82799		Translation initiation factor SUI1 family protein
FvH4_3g25070	Cluster 5	5.33198	1.78721	3.8836		Ankyrin repeat family protein
FvH4_4g37100	Cluster 5	10.9061	2.96878	7.65706	SDE3	P-loop containing nucleoside triphosphate hydrolases superfamily protein
FvH4_5g37213	Cluster 5	12.4281	4.46807	9.4788		Plant transposase (Ptta/En/Spm family)
FvH4_5g37420	Cluster 5	26.4133	10.7952	21.4042	MCM10	minichromosome maintenance 10
FvH4_6g38790	Cluster 5	5.04073	2.12902	5.21329		Protein of unknown function (DUF3414)
FvH4_6g53500	Cluster 5	17.675	6.55108	13.3932	ATPOT1,AtPOT1a	Nucleic acid-binding, OB-fold-like protein
FvH4_7g07610	Cluster 5	20.682	7.47178	15.5933	REM39,VRN1	AP2/B3-like transcriptional factor family protein
FvH4_7g12070	Cluster 5	200.257	64.8506	146.732	ZPR2	protein binding
FvH4_7g21060	Cluster 5	3.91184	0.557273	2.56065		disease resistance protein (TIR-NBS-LRR class), putative
FvH4_7g27354	Cluster 5	47.5043	20.9183	37.268	ATNOA1,ATNOS1,NOA1,NOS1,RIF1	P-loop containing nucleoside triphosphate hydrolases superfamily protein
FvH4_7g33140	Cluster 5	4.16119	1.57467	3.13401		disease resistance protein (TIR-NBS-LRR class), putative
FvH4_1g01520	Cluster 5	21.7956	7.59771	15.9829		Leucine-rich repeat transmembrane protein kinase family protein
FvH4_1g13960	Cluster 5	282.622	99.5889	208.87		S-adenosyl-L-methionine-dependent methyltransferases superfamily protein
FvH4_1g16211	Cluster 5	8.89791	3.43193	6.7562		S-locus lectin protein kinase family protein
FvH4_2g02354	Cluster 5	57.2032	22.2791	43.5983	ADL6,DRP2A	dynamin-like protein 6
FvH4_2g06040	Cluster 5	29.862	13.9432	25.7317
FvH4_2g29820	Cluster 5	2.54589	0.795578	1.80904	ABCG40,ATABCG40,ATPDR12,PDR12	pleiotropic drug resistance 12
FvH4_2g36400	Cluster 5	15.517	5.57012	11.5023	ATBZIP9,BZIP9,BZO2H2	basic leucine zipper 9
FvH4_3g03461	Cluster 5	6.28022	1.89347	4.42765	SD1-29	S-domain-1 29
FvH4_3g17550	Cluster 5	84.2317	32.3211	63.0748	AtUGT85A3,UGT85A3	UDP-glucosyl transferase 85A3
FvH4_3g23492	Cluster 5	8.55442	1.49184	5.71075	UBP12	ubiquitin-specific protease 12
FvH4_3g24730	Cluster 5	36.9282	13.0546	26.9276		alpha/beta-Hydrolases superfamily protein
FvH4_3g24830	Cluster 5	5.72714	2.06836	4.27103	bZIP21,TGA9	bZIP transcription factor family protein
FvH4_4g08670	Cluster 5	31.5096	12.0245	23.6396	BGT,GCN5,HAC3,HAG01,HAG1,HAT1	histone acetyltransferase of the GNAT family 1
FvH4_4g27450	Cluster 5	2.78244	0.100447	1.59926
FvH4_5g02600	Cluster 5	9.50122	3.90693	7.2937		Protein of unknown function (DUF3741)
FvH4_5g25662	Cluster 5	6.61818	2.46631	4.88583		Tetratricopeptide repeat (TPR)-like superfamily protein
FvH4_6g08611	Cluster 5	19.0542	5.68133	13.2683		neurofilament protein-related
FvH4_6g50400	Cluster 5	22.1645	7.0985	15.7648		nodulin MtN21 /EamA-like transporter family protein
FvH4_7g01563	Cluster 5	13.8941	5.45152	10.6114		NAD(P)-binding Rossmann-fold superfamily protein
FvH4_7g21050	Cluster 5	48.4197	7.21309	26.4075		Plant protein 1589 of unknown function
FvH4_1g00420	Cluster 5	2.42929	0.415775	1.60106		UDP-Glycosyltransferase superfamily protein
FvH4_1g09701	Cluster 5	16.0448	5.06546	11.6056
FvH4_1g15670	Cluster 5	5.48267	1.98446	3.90326		SAP domain-containing protein
FvH4_2g02431	Cluster 5	12.7026	3.69898	8.65639	ADL6,DRP2A	dynamin-like protein 6
FvH4_2g03523	Cluster 5	32.5035	10.4939	22.7088	scpl17	serine carboxypeptidase-like 17
FvH4_2g05820	Cluster 5	7.96289	3.30085	6.09082	PUB26	plant U-box 26
FvH4_2g07710	Cluster 5	5.47387	1.65145	3.92951		Uncharacterised protein family (UPF0497)
FvH4_2g18970	Cluster 5	11.5447	4.61991	8.70706		Sec14p-like phosphatidylinositol transfer family protein
FvH4_3g34440	Cluster 5	41.8315	15.9626	30.6469		P-loop containing nucleoside triphosphate hydrolases superfamily protein
FvH4_3g34940	Cluster 5	12.4213	3.99633	8.56268	GAMMA-TIP,GAMMA-TIP1,TIP1;1	gamma tonoplast intrinsic protein
FvH4_4g08121	Cluster 5	21.5832	9.24779	16.416
FvH4_4g14090	Cluster 5	38.0273	18.3657	26.0336
FvH4_5g04072	Cluster 5	10.3661	2.46038	6.61451	CIP1	COP1-interactive protein 1
FvH4_5g39610	Cluster 5	33.3231	9.61407	22.3547
FvH4_6g05050	Cluster 5	43.4108	8.07477	26.9665	SFP2	Major facilitator superfamily protein
FvH4_6g07300	Cluster 5	37.2589	9.92077	24.7548		Adenine nucleotide alpha hydrolases-like superfamily protein
FvH4_6g39970	Cluster 5	15.9348	3.34104	10.126	LAC14	laccase 14
FvH4_6g46340	Cluster 5	562.144	96.968	347.949		Pollen Ole e 1 allergen and extensin family protein
FvH4_6g50391	Cluster 5	15.4846	3.94984	9.95365		nodulin MtN21 /EamA-like transporter family protein
FvH4_7g05460	Cluster 5	13.6029	5.74484	10.3807		5'-nucleotidases;magnesium ion binding
FvH4_7g08800	Cluster 5	24.1292	9.5953	17.2727
FvH4_7g08940	Cluster 5	6.97032	0.394228	3.82812		Nodulin MtN3 family protein
FvH4_7g14290	Cluster 5	9.54052	3.66457	7.05092		Protein of unknown function (DUF3741)
FvH4_7g29830	Cluster 5	7.28241	2.18076	4.94869
FvH4_7g34070	Cluster 5	2.55821	0.496472	1.61791	BPA1	binding partner of acd11 1
FvH4_1g00345	Cluster 5	8.77412	2.11167	5.46841		Zinc-binding dehydrogenase family protein
FvH4_1g13370	Cluster 5	765.888	323.934	568.844
FvH4_2g02432	Cluster 5	58.1911	21.687	41.1334	ADL6,DRP2A	dynamin-like protein 6
FvH4_2g03550	Cluster 5	100.896	30.8589	66.4563	scpl6	serine carboxypeptidase-like 6
FvH4_2g06650	Cluster 5	13.2861	4.9778	9.51138		P-loop containing nucleoside triphosphate hydrolases superfamily protein
FvH4_2g15770	Cluster 5	11.8839	5.12517	8.88551	ATATR,ATR,ATRAD3	Ataxia telangiectasia-mutated and RAD3-related
FvH4_2g26470	Cluster 5	46.5645	20.7129	34.8533	ATTT12,TT12	MATE efflux family protein
FvH4_2g31680	Cluster 5	17.8885	5.38935	11.8106	CYP711A1,MAX1	cytochrome P450, family 711, subfamily A, polypeptide 1
FvH4_2g40890	Cluster 5	16.2397	5.26642	11.1611	ARR12,RR12	response regulator 12
FvH4_3g03200	Cluster 5	3.39788	1.06231	2.28307		basic helix-loop-helix (bHLH) DNA-binding superfamily protein
FvH4_3g06190	Cluster 5	14.1911	5.50475	10.2619		O-acetyltransferase family protein
FvH4_3g07680	Cluster 5	8.62005	2.68047	5.77591		Protein of unknown function (DUF688)
FvH4_3g19500	Cluster 5	15.6088	3.85469	9.29676	DEG5,DEGP5,HHOA	DEGP protease 5
FvH4_3g43390	Cluster 5	4.16022	1.20911	2.75996		NB-ARC domain-containing disease resistance protein
FvH4_3g45401	Cluster 5	11.5175	4.41224	8.64261	ACD1-LIKE,PTC52,TIC55-IV	ACD1-like
FvH4_3g45780	Cluster 5	14.8873	1.07533	7.30631
FvH4_4g03570	Cluster 5	92.0848	37.3649	68.633	AT-PHH1,ATCRY2,CRY2,FHA,PHH1	cryptochrome 2
FvH4_4g14680	Cluster 5	13.8556	6.37887	11.1271
FvH4_4g23220	Cluster 5	4.53324	1.07264	2.83544		Histidine kinase-, DNA gyrase B-, and HSP90-like ATPase family protein
FvH4_4g26060	Cluster 5	4.58118	0.476408	2.56685	MENG	S-adenosyl-L-methionine-dependent methyltransferases superfamily protein
FvH4_4g26770	Cluster 5	4.06512	1.16935	2.64405		Class I glutamine amidotransferase-like superfamily protein
FvH4_4g34051	Cluster 5	3.27331	0.979492	2.17345		Protein of unknown function, DUF593
FvH4_5g00440	Cluster 5	32.5533	11.4268	22.3372
FvH4_5g05000	Cluster 5	13.7229	4.23324	8.9337		nodulin MtN21 /EamA-like transporter family protein
FvH4_5g15070	Cluster 5	3.16015	0.759376	1.96533		Disease resistance protein (TIR-NBS-LRR class) family
FvH4_5g24360	Cluster 5	23.2822	8.18981	15.696		SH3 domain-containing protein
FvH4_5g24960	Cluster 5	8.36653	2.47845	5.74871
FvH4_6g20140	Cluster 5	8.7073	2.25985	5.55452	ATNHL10,NHL10,YLS9	Late embryogenesis abundant (LEA) hydroxyproline-rich glycoprotein family
FvH4_6g32520	Cluster 5	38.1369	16.3188	28.3413	AGL1,SHP1	K-box region and MADS-box transcription factor family protein
FvH4_6g45770	Cluster 5	4.37983	1.86925	3.16861
FvH4_7g30080	Cluster 5	5.0369	1.07634	2.98976	ATDTX35,DTX35,FFT	detoxifying efflux carrier 35
FvH4_7g31070	Cluster 5	26.8381	6.48989	16.4435	TRY	Homeodomain-like superfamily protein
FvH4_1g12717	Cluster 5	9.70558	1.48835	5.2248		P-loop containing nucleoside triphosphate hydrolases superfamily protein
FvH4_1g12820	Cluster 5	19.2724	8.65863	15.0371		Protein kinase superfamily protein
FvH4_1g23232	Cluster 5	13.1415	3.21053	7.92644	EMB3004,MEE32	dehydroquinate dehydratase, putative / shikimate dehydrogenase, putative
FvH4_1g27610	Cluster 5	19.0922	6.48229	12.1607	AGO6	Argonaute family protein
FvH4_2g03522	Cluster 5	88.0413	24.9075	56.0037	SCPL7	serine carboxypeptidase-like 7
FvH4_2g06540	Cluster 5	18.3204	6.35971	12.0928		alpha/beta-Hydrolases superfamily protein
FvH4_2g09820	Cluster 5	36.8885	16.532	27.1258	BGAL3	beta-galactosidase 3
FvH4_2g12830	Cluster 5	11.1773	4.30817	7.85958	LAC14	laccase 14
FvH4_2g27294	Cluster 5	28.1335	3.63771	14.2932
FvH4_2g31980	Cluster 5	4.63131	1.48356	3.06825	ATGLR2.7,GLR2.7	glutamate receptor 2.7
FvH4_3g02290	Cluster 5	4.9854	2.0132	3.61909		NB-ARC domain-containing disease resistance protein
FvH4_3g20963	Cluster 5	4.64039	1.98795	3.52477	HSI2,VAL1	high-level expression of sugar-inducible gene 2
FvH4_3g43250	Cluster 5	53.2139	20.4114	36.8486		Putative glycosyl hydrolase of unknown function (DUF1680)
FvH4_3g44060	Cluster 5	13.6016	3.6819	7.94304	RFL1	RPS5-like 1
FvH4_3g44561	Cluster 5	23.6461	9.23557	16.2854		NB-ARC domain-containing disease resistance protein
FvH4_4g08030	Cluster 5	30.2235	3.82003	15.0613
FvH4_4g08700	Cluster 5	3.50684	0.642783	1.98287		ENTH/ANTH/VHS superfamily protein
FvH4_4g09960	Cluster 5	19.711	5.62635	12.4537		Homeodomain-like transcriptional regulator
FvH4_4g13190	Cluster 5	7.81011	1.42056	4.17621	RALFL32	ralf-like 32
FvH4_4g13500	Cluster 5	3.33521	1.07098	2.22705		Ankyrin repeat family protein
FvH4_4g17100	Cluster 5	31.7815	8.0395	19.0251	VAP27-2	vamp/synaptobrevin-associated protein 27-2
FvH4_4g28350	Cluster 5	44.7129	18.4576	31.72	ATPPC4,PPC4	phosphoenolpyruvate carboxylase 4
FvH4_4g32290	Cluster 5	15.1868	4.06769	9.21352	ATMYB4,MYB4	myb domain protein 4
FvH4_4g37260	Cluster 5	6.61232	0.75362	3.47858		Eukaryotic aspartyl protease family protein
FvH4_5g03890	Cluster 5	22.4335	6.78793	14.075		Galactose mutarotase-like superfamily protein
FvH4_5g19230	Cluster 5	14.1125	5.03068	9.43956	ATMSH4,MSH4	MUTS-like protein 4
FvH4_5g26040	Cluster 5	11.763	4.36291	7.91923
FvH4_5g31920	Cluster 5	6.92619	1.47134	3.76531	UGT88A1	UDP-glucosyl transferase 88A1
FvH4_5g36440	Cluster 5	67.6074	24.7859	45.001	ATISA3,ISA3	isoamylase 3
FvH4_6g01940	Cluster 5	243.425	17.9831	119.995	LSH1	Protein of unknown function (DUF640)
FvH4_6g04150	Cluster 5	11.4227	4.5058	8.31207
FvH4_6g33540	Cluster 5	14.429	6.27609	10.2704	BGAL17	beta-galactosidase 17
FvH4_7g03660	Cluster 5	60.0574	24.5333	41.4123
FvH4_7g08890	Cluster 5	4.85375	1.89777	3.36875		NB-ARC domain-containing disease resistance protein
FvH4_7g22120	Cluster 5	23.7034	9.8083	16.6236
FvH4_1g04841	Cluster 5	45.125	17.8699	30.8986
FvH4_1g17510	Cluster 5	42.7946	10.1224	25.4791	ATBT4,BT4	BTB and TAZ domain protein 4
FvH4_1g22100	Cluster 5	8.29044	3.02084	5.53617		bacterial transferase hexapeptide repeat-containing protein
FvH4_2g03560	Cluster 5	29.4116	5.06148	16.0178	scpl18	serine carboxypeptidase-like 18
FvH4_2g05132	Cluster 5	76.468	25.6545	49.0229	ATCAD4,CAD,CAD-C,CAD4	GroES-like zinc-binding alcohol dehydrogenase family protein
FvH4_2g05604	Cluster 5	5.60805	0.572076	3.14506	UGT73B3	UDP-glucosyl transferase 73B3
FvH4_2g09420	Cluster 5	6.67992	2.22737	4.41396		Sec14p-like phosphatidylinositol transfer family protein
FvH4_2g19000	Cluster 5	18.0762	6.70733	11.9562		Protein of unknown function, DUF593
FvH4_2g21774	Cluster 5	12.9751	3.74759	8.00758	DMR6	2-oxoglutarate (2OG) and Fe(II)-dependent oxygenase superfamily protein
FvH4_2g22900	Cluster 5	10.5043	6.31235	10.9916		ATPase E1-E2 type family protein / haloacid dehalogenase-like hydrolase family protein
FvH4_2g24820	Cluster 5	68.2659	28.0295	47.6932
FvH4_2g37040	Cluster 5	10.6555	4.28092	7.45181		hydroxyproline-rich glycoprotein family protein
FvH4_2g37160	Cluster 5	9.96688	4.26051	6.89506	ATGLR2.8,GLR2.8	glutamate receptor 2.8
FvH4_2g38010	Cluster 5	12.3823	3.77412	7.57511	CPK29	calcium-dependent protein kinase 29
FvH4_3g00850	Cluster 5	24.5558	6.43128	14.2493	XTH23,XTR6	xyloglucan endotransglycosylase 6
FvH4_3g03435	Cluster 5	16.0875	5.50264	10.1356	SD1-29	S-domain-1 29
FvH4_3g04650	Cluster 5	16.9485	6.07788	11.2545		disease resistance protein (TIR class), putative
FvH4_3g14131	Cluster 5	9.25842	0.66749	4.17876	ATKS,ATKS1,GA2,KS,KS1	Terpenoid cyclases/Protein prenyltransferases superfamily protein
FvH4_3g17580	Cluster 5	6.91603	0.965971	3.53847		F-box/RNI-like/FBD-like domains-containing protein
FvH4_3g18340	Cluster 5	22.348	2.87255	10.7278	LSH10	Protein of unknown function (DUF640)
FvH4_3g35820	Cluster 5	2.71193	1.05076	1.81496	NAP1;2,NFA02,NFA2	nucleosome assembly protein 1;2
FvH4_3g38990	Cluster 5	39.1524	15.3494	26.8264		Protein phosphatase 2C family protein
FvH4_3g40411	Cluster 5	10.2543	3.22229	6.57102		Insulinase (Peptidase family M16) family protein
FvH4_4g00520	Cluster 5	15.643	6.49559	10.8724	LUH	LEUNIG_homolog
FvH4_4g04360	Cluster 5	16.1625	5.28207	10.2959		Cyclopropane-fatty-acyl-phospholipid synthase
FvH4_4g12760	Cluster 5	12.6274	5.34609	8.70243		basic helix-loop-helix (bHLH) DNA-binding superfamily protein
FvH4_4g15660	Cluster 5	22.6723	3.46761	11.2943	ATOFP16,OFP16	ovate family protein 16
FvH4_4g23000	Cluster 5	60.3927	16.6634	35.997	JAS1,JAZ10,TIFY9	jasmonate-zim-domain protein 10
FvH4_4g30310	Cluster 5	37.2086	6.37094	19.4965	BGLU40	beta glucosidase 40
FvH4_4g32010	Cluster 5	88.1175	38.7593	62.5852	ATCUL1,AXR6,CUL1	cullin 1
FvH4_4g35240	Cluster 5	2.68784	0.411292	1.66573	ATFH8,FH8	formin 8
FvH4_5g01820	Cluster 5	2.20413	0.0574019	0	ATOSM34,OSM34	osmotin 34
FvH4_5g04970	Cluster 5	63.0614	26.4197	43.0145		DCD (Development and Cell Death) domain protein
FvH4_5g07361	Cluster 5	17.7286	6.9208	12.0913	EMB2423	embryo defective 2423
FvH4_5g10290	Cluster 5	8.47018	1.37318	4.56031		Nucleoporin autopeptidase
FvH4_5g10980	Cluster 5	11.6148	2.98373	6.69636
FvH4_5g17300	Cluster 5	187.338	64.7538	121.61	NMT1,PEAMT,XPL1	S-adenosyl-L-methionine-dependent methyltransferases superfamily protein
FvH4_5g27250	Cluster 5	5.63247	1.2698	3.03855		Chitinase family protein
FvH4_5g37240	Cluster 5	8.11115	2.98557	5.44589		Ankyrin repeat family protein
FvH4_6g05090	Cluster 5	24.6633	5.68654	13.2241	ERD6	Major facilitator superfamily protein
FvH4_6g07700	Cluster 5	2.25859	0.0339523	0.996395		RNA ligase/cyclic nucleotide phosphodiesterase family protein
FvH4_6g38450	Cluster 5	35.3094	11.7021	20.9302	AB140,CAB1,CAB140,LHCB1.3	chlorophyll A/B binding protein 1
FvH4_6g38500	Cluster 5	13.1929	2.91192	7.23929	ATGSL07,atgsl7,gsl07	glucan synthase-like 7
FvH4_6g49940	Cluster 5	12.738	3.64814	7.66889		Disease resistance protein (CC-NBS-LRR class) family
FvH4_7g06401	Cluster 5	5.78297	1.81312	3.53568		RNA-binding (RRM/RBD/RNP motifs) family protein
FvH4_7g09280	Cluster 5	2.4257	0.770204	1.48904		NB-ARC domain-containing disease resistance protein
FvH4_7g12080	Cluster 5	11.7524	1.94107	5.78467
FvH4_7g15030	Cluster 5	3.04067	0.457244	1.4463	CHY1	beta-hydroxyisobutyryl-CoA hydrolase 1
FvH4_7g27355	Cluster 5	24.4876	9.12725	15.6358		NB-ARC domain-containing disease resistance protein
FvH4_7g33810	Cluster 5	8.23507	2.75769	5.12919		F-box and associated interaction domains-containing protein
FvH4_1g05980	Cluster 5	58.583	10.0813	30.4126		RNA-dependent RNA polymerase family protein
FvH4_1g14670	Cluster 5	139.94	14.4555	65.1186	REM39,VRN1	AP2/B3-like transcriptional factor family protein
FvH4_2g14320	Cluster 5	7.13368	1.87098	4.0254		disease resistance protein (TIR-NBS-LRR class), putative
FvH4_2g16600	Cluster 5	6.71379	2.19676	4.11072	PUB15	Plant U-Box 15
FvH4_2g30860	Cluster 5	41.0847	18.6407	29.5428	ATGPA1,GP,ALPHA,1,GPA1	G protein alpha subunit 1
FvH4_2g32410	Cluster 5	2.17062	0.103518	0.876039	HAT9	Homeobox-leucine zipper protein family
FvH4_3g06810	Cluster 5	13.4427	5.2312	8.80994		Leucine-rich repeat transmembrane protein kinase
FvH4_3g11810	Cluster 5	36.378	10.8843	21.129	LBD4	LOB domain-containing protein 4
FvH4_3g17851	Cluster 5	8.27146	1.26946	4.24366		Leucine-rich repeat transmembrane protein kinase
FvH4_3g43883	Cluster 5	29.5311	10.7575	18.3596		Toll-Interleukin-Resistance (TIR) domain family protein
FvH4_3g44000	Cluster 5	16.9913	7.38707	11.6039		actin binding
FvH4_4g07060	Cluster 5	7.41214	3.15341	5.13845	MANIA,MNS2	alpha-mannosidase 2
FvH4_4g08122	Cluster 5	29.8847	11.1233	18.3134
FvH4_4g08972	Cluster 5	17.1381	5.48586	10.0964
FvH4_4g19940	Cluster 5	27.8018	10.7882	18.4384
FvH4_4g20990	Cluster 5	21.1227	2.86212	9.48192		Pectin lyase-like superfamily protein
FvH4_4g31860	Cluster 5	19.0722	5.47486	10.8315		Disease resistance protein (CC-NBS-LRR class) family
FvH4_5g14100	Cluster 5	105.904	34.2584	63.9094
FvH4_5g36724	Cluster 5	21.3954	7.07698	12.8651	SNRK2-8,SNRK2.8,SRK2C	Protein kinase superfamily protein
FvH4_5g39140	Cluster 5	9.6891	3.58402	6.07466		Beta-glucosidase, GBA2 type family protein
FvH4_6g42550	Cluster 5	9.77325	4.25662	6.63714		RNA-binding KH domain-containing protein
FvH4_6g45521	Cluster 5	6.89804	2.14342	4.02986		NAD(P)-binding Rossmann-fold superfamily protein
FvH4_7g23671	Cluster 5	4.63818	1.39935	2.79403		UDP-Glycosyltransferase superfamily protein
FvH4_1g08610	Cluster 5	32.8447	13.4938	21.7856		Ankyrin repeat family protein
FvH4_1g10851	Cluster 5	2.93242	1.10877	1.84005		TTF-type zinc finger protein with HAT dimerisation domain
FvH4_1g16990	Cluster 5	32.4855	12.7165	21.0377		RING/U-box superfamily protein
FvH4_1g17860	Cluster 5	9.7929	3.99875	6.55195		Protein of unknown function (DUF295)
FvH4_1g19880	Cluster 5	3.25173	0.926135	1.81795
FvH4_2g21772	Cluster 5	9.88368	2.27259	5.15913	DMR6	2-oxoglutarate (2OG) and Fe(II)-dependent oxygenase superfamily protein
FvH4_3g43820	Cluster 5	15.1638	5.84775	9.53004
FvH4_4g26070	Cluster 5	4.66776	1.24363	2.60596	CRK3	cysteine-rich RLK (RECEPTOR-like protein kinase) 3
FvH4_5g06573	Cluster 5	3.2692	0.435082	1.58003	CYP71A25	cytochrome P450, family 71, subfamily A, polypeptide 25
FvH4_6g00230	Cluster 5	49.1678	20.3118	32.2573	AtCRT3,CRT3,EBS2,PSL1	calreticulin 3
FvH4_6g05061	Cluster 5	3.82456	0.622899	1.77305		Major facilitator superfamily protein
FvH4_6g24620	Cluster 5	2.23201	0.319043	0	ATCKX1,CKX1	cytokinin oxidase/dehydrogenase 1
FvH4_6g25440	Cluster 5	14.0465	3.54408	7.33051		Transmembrane amino acid transporter family protein
FvH4_6g27022	Cluster 5	2.45009	0.756779	1.43521		DNA/RNA polymerases superfamily protein
FvH4_6g34410	Cluster 5	5.42685	2.23238	3.53978		disease resistance protein (TIR-NBS-LRR class), putative
FvH4_7g28970	Cluster 5	15.5147	6.48776	9.87411		TraB family protein
FvH4_1g24510	Cluster 5	9.59383	3.54766	5.89294	ATHDA14,hda14	histone deacetylase 14
FvH4_2g04310	Cluster 5	5.19017	0.799335	2.14751
FvH4_2g27721	Cluster 5	4.37175	1.54289	2.59355		Disease resistance protein (TIR-NBS-LRR class) family
FvH4_2g31660	Cluster 5	38.6871	9.04267	20.0248	CYP711A1,MAX1	cytochrome P450, family 711, subfamily A, polypeptide 1
FvH4_3g06640	Cluster 5	5.76703	1.34345	2.92032		myosin heavy chain-related
FvH4_3g38600	Cluster 5	32.7156	10.3794	18.6449		RING/U-box superfamily protein
FvH4_5g35401	Cluster 5	20.1158	6.55963	11.4273	AGL22,SVP	K-box region and MADS-box transcription factor family protein
FvH4_7g25401	Cluster 5	115.046	16.2562	50.6743		Heavy metal transport/detoxification superfamily protein
FvH4_3g22070	Cluster 5	20.3724	7.01109	11.88	MAPKKK19	mitogen-activated protein kinase kinase kinase 19
FvH4_6g41980	Cluster 5	10.645	1.39472	4.55466	MPL1	Myzus persicae-induced lipase 1
FvH4_7g21500	Cluster 5	4.9418	1.981	3.11925	THE1	protein kinase family protein
FvH4_1g07150	Cluster 5	73.6234	10.2452	32.1878	ATET2,ET2	effector of transcription2
FvH4_3g22110	Cluster 5	6.1182	1.4839	3.06464	ATSGP1,SGP1	Ras-related small GTP-binding family protein
FvH4_4g33550	Cluster 5	7.67651	2.83371	4.71131		UDP-3-O-acyl N-acetylglycosamine deacetylase family protein
FvH4_7g26311	Cluster 5	18.5769	5.05407	10.2494		Calcium-dependent lipid-binding (CaLB domain) family protein
FvH4_2g13660	Cluster 5	3.19957	0.865631	1.64124		HSP20-like chaperones superfamily protein
FvH4_4g09010	Cluster 5	9.59609	3.93986	5.03403
FvH4_3g04560	Cluster 6	13.3492	120.542	131.366
FvH4_3g38120	Cluster 6	27.166	43.9649	47.8422	ATPTR1,PTR1	peptide transporter 1
FvH4_3g42660	Cluster 6	1.35457	6.66302	7.00763	ATOPT1,OPT1	oligopeptide transporter 1
FvH4_4g01660	Cluster 6	25.7067	42.1695	45.5624	APS1	ATP sulfurylase 1
FvH4_4g25340	Cluster 6	4.71727	12.7693	12.1485		Cellulase (glycosyl hydrolase family 5) protein
FvH4_4g35270	Cluster 6	0.764959	2.06121	2.00978		Amino acid permease family protein
FvH4_5g09190	Cluster 6	4.68179	29.572	27.2663	ACP4	acyl carrier protein 4
FvH4_5g09720	Cluster 6	1.87194	6.40191	5.44502
FvH4_5g36540	Cluster 6	5.33931	13.6067	15.3333		NAD(P)-binding Rossmann-fold superfamily protein
FvH4_6g07500	Cluster 6	6.11786	45.474	42.6937		F-box/RNI-like/FBD-like domains-containing protein
FvH4_6g10310	Cluster 6	3.10471	19.9501	16.7002
FvH4_6g19330	Cluster 6	3.85624	7.53038	6.95582		chaperone protein dnaJ-related
FvH4_6g42131	Cluster 6	5.4826	7.77482	7.86506	ADS3,FAD5,FADB,JB67	fatty acid desaturase 5
FvH4_6g47650	Cluster 6	4.49578	11.646	11.2143		Saccharopine dehydrogenase
FvH4_7g03220	Cluster 6	1.39282	5.47257	5.22582	NQR	NADPH:quinone oxidoreductase
FvH4_7g09820	Cluster 6	51.3231	80.5064	80.1863	HAT3	homeobox-leucine zipper protein 3
FvH4_7g21400	Cluster 6	1.1903	3.3013	2.9569	PPL2	PsbP-like protein 2
FvH4_2g03060	Cluster 6	4.34561	10.6993	11.1801		Tetratricopeptide repeat (TPR)-like superfamily protein
FvH4_2g06480	Cluster 6	8.47266	22.9533	24.4679	ATCXE13,CXE13	carboxyesterase 13
FvH4_2g12490	Cluster 6	28.3633	47.3054	49.7497	ATPD	ATP synthase delta-subunit gene
FvH4_2g21340	Cluster 6	42.8268	72.769	78.7693		Ribosomal protein L10 family protein
FvH4_2g23070	Cluster 6	5.48364	9.01113	9.89624		Bax inhibitor-1 family protein
FvH4_2g28950	Cluster 6	27.7973	48.7423	52.8347		Protein kinase superfamily protein
FvH4_2g36290	Cluster 6	17.5761	35.4998	38.7163	ATGLB3,GLB3	hemoglobin 3
FvH4_2g40660	Cluster 6	44.7464	86.368	95.0461		Dof-type zinc finger DNA-binding family protein
FvH4_3g00950	Cluster 6	46.8741	76.3363	82.2867		SWIB complex BAF60b domain-containing protein
FvH4_3g01820	Cluster 6	102.444	169.433	184.78		Glycine cleavage T-protein family
FvH4_3g02831	Cluster 6	2.88809	12.8742	13.7411		MATE efflux family protein
FvH4_3g04270	Cluster 6	1.75734	4.31944	4.43159	BUM,BUM1,SHL,STM,WAM,WAM1	KNOX/ELK homeobox transcription factor
FvH4_3g08970	Cluster 6	59.7014	103.089	105.714		Ribosomal protein S5 family protein
FvH4_3g19430	Cluster 6	66.8908	110.738	114.563		chloroplast 30S ribosomal protein S20, putative
FvH4_3g23500	Cluster 6	5.65833	11.9181	12.2473		SWIB/MDM2 domain superfamily protein
FvH4_3g28460	Cluster 6	27.2995	48.1583	52.2789		ABC-2 type transporter family protein
FvH4_3g28760	Cluster 6	13.3987	28.9884	29.1032	MAR1,TOC75-III	translocon at the outer envelope membrane of chloroplasts 75-III
FvH4_3g32260	Cluster 6	5.92162	17.1115	18.4722	PIP2;2,PIP2B	plasma membrane intrinsic protein 2
FvH4_3g36920	Cluster 6	1.31576	6.79233	7.32245	RCA	rubisco activase
FvH4_3g37550	Cluster 6	10.8388	28.9525	31.6087		Serine protease inhibitor (SERPIN) family protein
FvH4_4g00500	Cluster 6	54.4341	94.537	97.0081
FvH4_4g09780	Cluster 6	6.0337	14.6534	14.3195	ATTPS11,ATTPSB,TPS11	trehalose phosphatase/synthase 11
FvH4_4g13670	Cluster 6	5.3598	12.1941	12.6327		GC-rich sequence DNA-binding factor-like protein with Tuftelin interacting domain
FvH4_4g22500	Cluster 6	25.4869	49.4073	49.0939		transferases, transferring glycosyl groups
FvH4_4g23040	Cluster 6	10.3194	40.2959	37.886		GRAM domain family protein
FvH4_4g23670	Cluster 6	232.018	428.566	426.379	LTPG1	glycosylphosphatidylinositol-anchored lipid protein transfer 1
FvH4_4g25900	Cluster 6	17.6091	33.1724	36.9985	PHS1	poor homologous synapsis 1
FvH4_4g29530	Cluster 6	5.52228	37.1603	34.4832
FvH4_4g29610	Cluster 6	4.46895	22.2064	19.3307	AGL3,SEP4	K-box region and MADS-box transcription factor family protein
FvH4_4g34800	Cluster 6	27.252	55.1893	60.2389	ATTPS10,TPS10	trehalose phosphate synthase
FvH4_4g36102	Cluster 6	428.496	790.069	766.516	LCR69,PDF2.2	low-molecular-weight cysteine-rich 69
FvH4_4g36190	Cluster 6	7.68124	22.2101	22.627
FvH4_4g36900	Cluster 6	8.73278	16.5204	16.9488
FvH4_5g01670	Cluster 6	0.605823	3.24091	2.9864		PAS domain-containing protein tyrosine kinase family protein
FvH4_5g03090	Cluster 6	5.59869	15.5921	14.9441
FvH4_5g07331	Cluster 6	2.32628	4.44154	4.8637		Radical SAM superfamily protein
FvH4_5g09790	Cluster 6	3.23045	10.4835	9.7112
FvH4_5g12860	Cluster 6	0.846583	4.1815	3.63286	AtENODL5,ENODL5	early nodulin-like protein 5
FvH4_5g13400	Cluster 6	1.0394	3.49797	3.17254		18S pre-ribosomal assembly protein gar2-related
FvH4_5g13510	Cluster 6	2.3483	227.314	207.624	AGL2,SEP1	K-box region and MADS-box transcription factor family protein
FvH4_5g13740	Cluster 6	14.5056	25.9038	27.2435		Protein of unknown function (DUF1118)
FvH4_5g15220	Cluster 6	2.49246	20.3132	17.7441	BHLH161,BNQ3	BANQUO 3
FvH4_5g17760	Cluster 6	37.2085	68.3873	71.8044		Protein of unknown function (DUF760)
FvH4_5g20460	Cluster 6	4.62897	21.3182	19.5379	DHS2	3-deoxy-d-arabino-heptulosonate 7-phosphate synthase
FvH4_5g23520	Cluster 6	3.90168	17.3787	16.6848	PRK	phosphoribulokinase
FvH4_5g23750	Cluster 6	12.3664	23.8761	24.3118	UFD1	ubiquitin fusion degradation 1
FvH4_5g23940	Cluster 6	4.50925	10.2527	9.66458
FvH4_5g34720	Cluster 6	43.4598	89.4957	88.7114
FvH4_5g34840	Cluster 6	0.370066	2.31558	2.11927	CER2,VC-2,VC2	HXXXD-type acyl-transferase family protein
FvH4_5g38250	Cluster 6	0.0758691	1.86998	1.57841
FvH4_5g38291	Cluster 6	1.93852	3.91528	3.61515		Pentatricopeptide repeat (PPR) superfamily protein
FvH4_6g03680	Cluster 6	14.4341	27.276	27.9597		Rubredoxin-like superfamily protein
FvH4_6g06070	Cluster 6	18.301	81.6506	83.3757	ANAC098,ATCUC2,CUC2	NAC (No Apical Meristem) domain transcriptional regulator superfamily protein
FvH4_6g06530	Cluster 6	53.0074	137.089	131.054		Rubber elongation factor protein (REF)
FvH4_6g07720	Cluster 6	1.89691	4.83212	4.64005		F-box family protein
FvH4_6g10340	Cluster 6	4.43553	7.42248	7.31775		Pentatricopeptide repeat (PPR) superfamily protein
FvH4_6g10390	Cluster 6	64.0693	175.077	189.46		ENTH/VHS/GAT family protein
FvH4_6g15700	Cluster 6	0.615493	2.93989	2.62157	ATFLA11,FLA11	FASCICLIN-like arabinogalactan-protein 11
FvH4_6g16343	Cluster 6	22.6105	63.8449	62.3773	CLV3	CLAVATA3
FvH4_6g19360	Cluster 6	2.2906	6.26555	6.90169
FvH4_6g20570	Cluster 6	0.639448	3.01498	2.65311
FvH4_6g27330	Cluster 6	3.77442	7.20348	6.74472	ATFMN/FHY,FMN/FHY	riboflavin kinase/FMN hydrolase
FvH4_6g27480	Cluster 6	24.2712	58.1621	59.2022	MAX2,ORE9,PPS	RNI-like superfamily protein
FvH4_6g29740	Cluster 6	3.67675	7.95623	7.44603	AHP6,HP6	histidine phosphotransfer protein 6
FvH4_6g31480	Cluster 6	7.89899	17.3949	17.0387		Ribosomal protein L31
FvH4_6g31721	Cluster 6	26.7774	50.753	50.7651		D-isomer specific 2-hydroxyacid dehydrogenase family protein
FvH4_6g32260	Cluster 6	0.815277	3.73808	3.69595		Protein of unknown function (DUF1677)
FvH4_6g43020	Cluster 6	4.24861	12.5855	12.6892	SIP1;2,SIP1B	Aquaporin-like superfamily protein
FvH4_6g43390	Cluster 6	31.9981	63.0087	65.6086	HDG2	homeodomain GLABROUS 2
FvH4_6g43860	Cluster 6	940.907	1860.6	1865.35	XTH9	xyloglucan endotransglucosylase/hydrolase 9
FvH4_6g45050	Cluster 6	16.9288	52.2847	46.9892	PSB27	photosystem II family protein
FvH4_6g47150	Cluster 6	37.8343	63.7435	61.9004		Protein of unknown function (DUF295)
FvH4_6g48630	Cluster 6	20.594	58.9342	53.6971	ATMYB30,MYB30	myb domain protein 30
FvH4_7g00250	Cluster 6	7.14862	7.98612	9.04874	BGLU17	beta glucosidase 17
FvH4_7g00900	Cluster 6	9.75783	19.5806	20.1543		Mog1/PsbP/DUF1795-like photosystem II reaction center PsbP family protein
FvH4_7g03850	Cluster 6	0.783604	1.97797	2.0873		Tetratricopeptide repeat (TPR)-like superfamily protein
FvH4_7g04010	Cluster 6	0.749994	3.03159	2.93293		RING/U-box superfamily protein
FvH4_7g06890	Cluster 6	12.2987	38.7177	34.2142	PHF1	phosphate transporter traffic facilitator1
FvH4_7g07030	Cluster 6	10.1843	17.622	18.5935		glycosyltransferase family protein 47
FvH4_7g12120	Cluster 6	166.578	294.124	319.364	FLA10	FASCICLIN-like arabinogalactan-protein 10
FvH4_7g17040	Cluster 6	1.65708	3.30851	3.50493		Pentatricopeptide repeat (PPR) superfamily protein
FvH4_7g17240	Cluster 6	3.35908	6.92315	6.56167
FvH4_7g20420	Cluster 6	10.6789	20.2908	20.7513	ATSUMO2,SUM2,SUMO,2,SUMO2	small ubiquitin-like modifier 2
FvH4_7g21880	Cluster 6	0.0211448	7.23038	6.33243		C2H2 and C2HC zinc fingers superfamily protein
FvH4_7g25360	Cluster 6	60.8922	100.974	97.6473	PRA1.B4	prenylated RAB acceptor 1.B4
FvH4_1g01020	Cluster 6	3.83004	7.97289	8.24764		BTB/POZ domain with WD40/YVTN repeat-like protein
FvH4_1g01710	Cluster 6	5.3331	10.6929	11.0803		Cyclophilin-like peptidyl-prolyl cis-trans isomerase family protein
FvH4_1g02620	Cluster 6	1.58399	6.12502	6.00837	DIN10	Raffinose synthase family protein
FvH4_1g02670	Cluster 6	10.5044	19.3373	19.991	MSS3	Calcium-binding EF-hand family protein
FvH4_1g05310	Cluster 6	5.43453	15.0797	14.6126	HCF101	ATP binding
FvH4_1g06850	Cluster 6	2.50853	5.94557	5.92913	PHYE	phytochrome E
FvH4_1g07650	Cluster 6	5.91226	10.9007	11.3568		alpha/beta-Hydrolases superfamily protein
FvH4_1g12582	Cluster 6	14.193	116.433	124.577	ERD10,LTI29,LTI45	Dehydrin family protein
FvH4_1g13930	Cluster 6	0.814155	56.8347	50.9175	ATHB40,HB-5,HB40	homeobox protein 40
FvH4_1g14000	Cluster 6	1.27832	4.01206	8.38992		UDP-Glycosyltransferase superfamily protein
FvH4_1g14790	Cluster 6	179.432	358.062	334.479	OBP1	OBF binding protein 1
FvH4_1g17140	Cluster 6	42.5428	138.468	123.284		Late embryogenesis abundant protein, group 6
FvH4_1g20390	Cluster 6	3.75119	8.72069	8.51379	ABCG11,ATWBC11,COF1,DSO,WBC11	white-brown complex homolog protein 11
FvH4_1g21810	Cluster 6	12.5237	34.8858	36.3425	RHA2A	RING-H2 finger A2A
FvH4_1g24330	Cluster 6	5.66043	10.4946	10.5837	NDH-O	NAD(P)H:plastoquinone dehydrogenase complex subunit O
FvH4_1g28620	Cluster 6	1.47066	2.93301	3.05425		Tetratricopeptide repeat (TPR)-like superfamily protein
FvH4_1g28660	Cluster 6	10.466	18.7058	18.3802		Mog1/PsbP/DUF1795-like photosystem II reaction center PsbP family protein
FvH4_2g01060	Cluster 6	12.9384	28.3917	26.4712
FvH4_2g02240	Cluster 6	1.10793	4.43407	4.38954	MRL1	Pentatricopeptide repeat (PPR) superfamily protein
FvH4_2g04020	Cluster 6	7.8024	16.3959	14.9573	pde194	formyltransferase, putative
FvH4_2g04120	Cluster 6	5.53391	13.661	13.24	STZ,ZAT10	salt tolerance zinc finger
FvH4_2g04630	Cluster 6	5.24503	21.5454	18.1673
FvH4_2g05690	Cluster 6	7.56478	13.6063	14.0778	UGT73B5	UDP-glucosyl transferase 73B5
FvH4_2g06140	Cluster 6	0.887514	7.81929	6.64378		Calcium-binding EF-hand family protein
FvH4_2g09801	Cluster 6	2.3714	8.13057	6.96847		Aminotransferase-like, plant mobile domain family protein
FvH4_2g09802	Cluster 6	3.49588	8.91337	7.89006
FvH4_2g10110	Cluster 6	15.2771	28.6142	27.0187		RNA-binding CRS1 / YhbY (CRM) domain protein
FvH4_2g10390	Cluster 6	23.2515	41.0594	42.8386	FBA2	fructose-bisphosphate aldolase 2
FvH4_2g13240	Cluster 6	0.456565	2.61276	2.19998		Integrase-type DNA-binding superfamily protein
FvH4_2g17810	Cluster 6	881.861	1556.89	1634.25		Lactoylglutathione lyase / glyoxalase I family protein
FvH4_2g18350	Cluster 6	3.709	8.06121	7.30735		Oxidoreductase, zinc-binding dehydrogenase family protein
FvH4_2g18440	Cluster 6	21.4333	53.0418	54.4241		nuclear transport factor 2 (NTF2) family protein / RNA recognition motif (RRM)-containing protein
FvH4_2g24470	Cluster 6	9.41482	15.9072	15.5236		Nucleic acid-binding, OB-fold-like protein
FvH4_2g27870	Cluster 6	0	22.5764	18.2363	PI	K-box region and MADS-box transcription factor family protein
FvH4_2g30090	Cluster 6	6.2354	12.4555	11.1559		2Fe-2S ferredoxin-like superfamily protein
FvH4_2g30710	Cluster 6	71.1034	161.124	160.233		selenium binding
FvH4_2g30980	Cluster 6	15.7335	25.6626	26.4082
FvH4_2g32820	Cluster 6	1.00745	3.4923	3.34027		alpha/beta-Hydrolases superfamily protein
FvH4_2g32940	Cluster 6	6.57708	13.611	13.1903
FvH4_2g33321	Cluster 6	2.07004	15.5463	14.092	ARA12	Subtilase family protein
FvH4_2g38460	Cluster 6	1.55387	3.8523	3.83454
FvH4_3g02190	Cluster 6	12.923	24.5696	24.0621		oxidoreductase, zinc-binding dehydrogenase family protein
FvH4_3g02310	Cluster 6	14.1203	23.9785	22.5086		DNA binding
FvH4_3g02520	Cluster 6	35.7829	64.3176	63.4304	PDF2	protodermal factor 2
FvH4_3g06600	Cluster 6	8.08164	17.2999	16.3126
FvH4_3g06690	Cluster 6	1.05227	9.0967	8.2689	HCT	hydroxycinnamoyl-CoA shikimate/quinate hydroxycinnamoyl transferase
FvH4_3g08560	Cluster 6	44.3258	75.4	73.1771	APE2,TPT	Glucose-6-phosphate/phosphate translocator-related
FvH4_3g08740	Cluster 6	1.92467	6.17478	5.22385	NSL1	MAC/Perforin domain-containing protein
FvH4_3g14550	Cluster 6	13.7219	31.9115	30.6714		Cation efflux family protein
FvH4_3g17160	Cluster 6	10.1845	18.6173	17.6497		F-box/RNI-like superfamily protein
FvH4_3g18841	Cluster 6	162.874	283.616	264.835
FvH4_3g27860	Cluster 6	52.1358	138.208	128.646		Predicted AT-hook DNA-binding family protein
FvH4_3g34020	Cluster 6	4.25711	17.8778	15.8957
FvH4_3g36890	Cluster 6	12.2822	21.2181	21.4356	LUX,PCL1	Homeodomain-like superfamily protein
FvH4_3g37660	Cluster 6	49.599	198.902	159.645	AB140,CAB1,CAB140,LHCB1.3	chlorophyll A/B binding protein 1
FvH4_3g39090	Cluster 6	7.07349	18.823	17.4012	ATL2,TL2	TOXICOS EN LEVADURA 2
FvH4_3g44681	Cluster 6	5.93228	10.6521	10.3518	EDA3	DnaJ/Hsp40 cysteine-rich domain superfamily protein
FvH4_4g00310	Cluster 6	99.9722	183.345	180.941	KAT2,PED1,PKT3	peroxisomal 3-ketoacyl-CoA thiolase 3
FvH4_4g09850	Cluster 6	2.73221	5.87679	5.25629		F-box family protein
FvH4_4g15270	Cluster 6	0	4.14528	3.60353		Haloacid dehalogenase-like hydrolase (HAD) superfamily protein
FvH4_4g24410	Cluster 6	14.4293	30.0183	28.731		Ankyrin repeat family protein
FvH4_4g30770	Cluster 6	2.72858	5.3448	5.09345
FvH4_4g31520	Cluster 6	4.65185	12.1886	10.3527	AtTCP14,TCP14	TEOSINTE BRANCHED, cycloidea and PCF (TCP) 14
FvH4_4g33011	Cluster 6	1.09933	9.08297	7.4219	ATPAP3,PAP3	purple acid phosphatase 3
FvH4_4g37361	Cluster 6	8.53179	17.6103	16.3869	AGAL1,AtAGAL1	alpha-galactosidase 1
FvH4_5g06350	Cluster 6	66.6044	123.536	117.216	ATRAB8D,ATRABE1B,RABE1b	RAB GTPase homolog E1B
FvH4_5g13500	Cluster 6	10.7917	65.9836	52.6346	AGL8,FUL	AGAMOUS-like 8
FvH4_5g29630	Cluster 6	6.62433	11.3444	10.7666		GNS1/SUR4 membrane protein family
FvH4_6g00530	Cluster 6	207.828	380.482	353.445	PSAL	photosystem I subunit l
FvH4_6g01190	Cluster 6	4.90014	11.2136	10.0635	TET2	tetraspanin2
FvH4_6g07120	Cluster 6	9.94516	60.2822	46.1782	GATA15	GATA transcription factor 15
FvH4_6g14991	Cluster 6	5.05948	10.9604	9.73957	CPR30	F-box and associated interaction domains-containing protein
FvH4_6g27680	Cluster 6	2.22461	4.80715	4.39377	NDF2,NDH45	NDH-dependent cyclic electron flow 1
FvH4_6g28480	Cluster 6	61.1496	172.17	145.481	J8	Chaperone DnaJ-domain superfamily protein
FvH4_6g40590	Cluster 6	20.7788	37.1332	34.7981	FLA2	FASCICLIN-like arabinogalactan 2
FvH4_6g41510	Cluster 6	7.91156	20.7733	18.1116	SCN1	Immunoglobulin E-set superfamily protein
FvH4_6g46890	Cluster 6	10.8228	39.1326	30.5696	scpl25	serine carboxypeptidase-like 25
FvH4_6g51480	Cluster 6	5.60312	14.8494	12.4831
FvH4_7g01040	Cluster 6	0.411753	3.21336	2.46589	ATFRD3,FRD3,MAN1	MATE efflux family protein
FvH4_7g04770	Cluster 6	22.5719	41.4111	38.9715	UBP13	ubiquitin-specific protease 13
FvH4_7g14480	Cluster 6	13.1967	29.698	25.552	CYP86A8,LCR	cytochrome P450, family 86, subfamily A, polypeptide 8
FvH4_7g19790	Cluster 6	3.39066	5.96068	5.58453	ATMLO6,MLO6	Seven transmembrane MLO family protein
FvH4_7g19800	Cluster 6	4.41605	8.87712	8.18823	TET6	tetraspanin6
FvH4_7g26800	Cluster 6	17.6937	30.8686	29.7489	PMSR4	peptide met sulfoxide reductase 4
FvH4_7g31780	Cluster 6	5.80309	42.0978	34.2118
FvH4_1g04810	Cluster 6	1.17441	6.01282	4.62711	AT-HSFC1,HSFC1	heat shock transcription factor C1
FvH4_1g07920	Cluster 6	104.15	176	167.351	EIF4A-2	eif4a-2
FvH4_1g08270	Cluster 6	57.2563	121.312	111.06	PSBX	photosystem II subunit X
FvH4_1g08580	Cluster 6	1.03931	4.67684	3.68907		Mob1/phocein family protein
FvH4_1g11760	Cluster 6	0.271935	4.4052	3.36003		Chaperone DnaJ-domain superfamily protein
FvH4_1g11940	Cluster 6	18.723	31.1599	30.0465
FvH4_1g12210	Cluster 6	0.255835	2.09529	1.56531	CYP84A1,FAH1	ferulic acid 5-hydroxylase 1
FvH4_1g12260	Cluster 6	0.14741	12.5446	9.44265	AP3,ATAP3	K-box region and MADS-box transcription factor family protein
FvH4_1g14040	Cluster 6	68.2074	193.725	162.764	BZR1	Brassinosteroid signalling positive regulator (BZR1) family protein
FvH4_2g08000	Cluster 6	9.17142	16.3056	15.3715
FvH4_2g13890	Cluster 6	9.64731	21.4132	18.472		Inositol monophosphatase family protein
FvH4_2g24330	Cluster 6	11.0109	22.7042	19.9091		Leucine-rich repeat (LRR) family protein
FvH4_2g28720	Cluster 6	3.06521	5.92307	5.40942	AtGUS3,GUS3	glucuronidase 3
FvH4_2g39640	Cluster 6	4.38447	9.94489	8.43466	AtTLP6,TLP6	tubby like protein 6
FvH4_3g00600	Cluster 6	0.278211	2.85882	2.09016
FvH4_3g04010	Cluster 6	1.11374	7.40631	5.50672	DFL1,GH3.6	Auxin-responsive GH3 family protein
FvH4_3g04710	Cluster 6	0.187575	11.1091	8.45922
FvH4_3g05890	Cluster 6	6.50852	12.6286	11.2343
FvH4_3g09410	Cluster 6	7.65175	23.7825	18.824	ALN,ATALN	allantoinase
FvH4_3g20500	Cluster 6	1.97937	8.38432	6.5394		Polynucleotidyl transferase, ribonuclease H-like superfamily protein
FvH4_3g22510	Cluster 6	3.74509	9.65924	7.98062	ATPAP18,PAP18	purple acid phosphatase 18
FvH4_3g24571	Cluster 6	6.46618	22.4877	18.1184	CER4,FAR3,G7	Jojoba acyl CoA reductase-related male sterility protein
FvH4_3g28710	Cluster 6	165.479	315.149	289.708		Photosystem II 5 kD protein
FvH4_3g33060	Cluster 6	11.0338	42.0201	32.3867		GTP binding Elongation factor Tu family protein
FvH4_3g39410	Cluster 6	52.9217	105.428	92.5045	LSH6	Protein of unknown function (DUF640)
FvH4_4g04100	Cluster 6	10.5742	18.7075	16.9875	EDA6,MEE37	embryo sac development arrest 6
FvH4_4g05050	Cluster 6	0.851048	80.2211	55.2109		AWPM-19-like family protein
FvH4_4g14890	Cluster 6	32.7852	61.7366	55.0145		Glycoprotein membrane precursor GPI-anchored
FvH4_4g36220	Cluster 6	19.9384	33.3954	30.9062
FvH4_5g06903	Cluster 6	4.944	12.5765	10.7349
FvH4_5g10820	Cluster 6	0.58919	2.90744	2.19319
FvH4_5g16850	Cluster 6	1.08292	8.34756	5.82001	REM39,VRN1	AP2/B3-like transcriptional factor family protein
FvH4_5g21490	Cluster 6	1.33069	11.023	7.71474	NRT1.5	nitrate transporter 1.5
FvH4_6g07220	Cluster 6	83.0235	208.765	173.422		Protein of unknown function (DUF1645)
FvH4_6g08640	Cluster 6	6.95365	17.4709	14.0491		Pectinacetylesterase family protein
FvH4_6g29010	Cluster 6	2.9763	14.3778	10.4047		Integrase-type DNA-binding superfamily protein
FvH4_6g29370	Cluster 6	15.4758	30.3204	27.671		VQ motif-containing protein
FvH4_6g47750	Cluster 6	5.15258	17.4182	13.5375		Protein of unknown function (DUF179)
FvH4_7g05960	Cluster 6	21.7514	49.8946	41.6528	CYP77A4	cytochrome P450, family 77, subfamily A, polypeptide 4
FvH4_7g08200	Cluster 6	39.3569	76.8827	68.2272		Ribosomal protein L3 family protein
FvH4_7g10550	Cluster 6	29.46	59.1911	52.4668
[truncated: 1,015 more rows]

## Sheet: TFs in the clusters
All the transcription factor genes in the nine k-means clusters
Clusters	Transcription factor	Gene ID	SAM_FPKM	SFM_FPKM	REM_FPKM	Symbol	Description
Cluster 1	AP2/ERF-ERF	FvH4_2g35620	19.2883	39.9979	8.44323	TINY2	Integrase-type DNA-binding superfamily protein
Cluster 1	AP2/ERF-ERF	FvH4_3g08750	248.439	262.041	140.222	ATERF-4,ATERF4,ERF4,RAP2.5	ethylene responsive element binding factor 4
Cluster 1	AP2/ERF-ERF	FvH4_5g19800	19.0832	19.8587	7.98053	ATERF-5,ATERF5,ERF5	ethylene responsive element binding factor 5
Cluster 1	AP2/ERF-ERF	FvH4_7g30930	6.02834	8.01946	2.37401	CRF4	cytokinin response factor 4
Cluster 1	C2C2-Dof	FvH4_6g14000	10.9822	15.6841	7.25232	ATDOF2.4,DOF2.4	DNA binding with one finger 2.4
Cluster 1	C2C2-YABBY	FvH4_3g26130	28.6754	36.415	20.6023	YAB2	Plant-specific transcription factor YABBY family protein
Cluster 1	C2C2-YABBY	FvH4_5g00320	252.916	244.07	99.8354	AFO,FIL,YAB1	Plant-specific transcription factor YABBY family protein
Cluster 1	C2H2	FvH4_2g26340	8.93309	11.9982	5.80908		C2H2-like zinc finger protein
Cluster 1	C2H2	FvH4_3g08710	82.6094	84.0319	33.2217		Drought-responsive family protein
Cluster 1	C2H2	FvH4_6g23170	10.6412	13.2873	1.15432	NTT,WIP2	C2H2-type zinc finger family protein
Cluster 1	GARP-G2-like	FvH4_1g04130	3.2426	6.65588	1.74135		Homeodomain-like superfamily protein
Cluster 1	GARP-G2-like	FvH4_6g40170	2.09931	3.42051	0.823432	UNE16	Homeodomain-like superfamily protein
Cluster 1	GRF	FvH4_1g18220	166.406	168.223	88.3004	AtGRF1,GRF1	growth-regulating factor 1
Cluster 1	GRF	FvH4_6g18130	115.933	135.236	74.7053	AtGRF4,GRF4	growth-regulating factor 4
Cluster 1	HB-HD-ZIP	FvH4_5g19570	67.0771	93.4759	52.0405	ATHB-2,ATHB2,HAT4,HB-2	homeobox protein 2
Cluster 1	HB-HD-ZIP	FvH4_6g17450	14.3897	38.4565	2.85898	ATHB51,HB51,LMI1	homeobox 51
Cluster 1	HB-HD-ZIP	FvH4_6g22050	60.5199	58.3466	27.3727	HAT14	homeobox from Arabidopsis thaliana
Cluster 1	HB-WOX	FvH4_1g11910	10.455	16.0351	1.74714	PGA6,WUS,WUS1	Homeodomain-like superfamily protein
Cluster 1	HB-WOX	FvH4_3g08310	9.64792	12.311	6.00913	HB-3,STIP,WOX9	homeobox-3
Cluster 1	HB-WOX	FvH4_3g34410	8.23002	9.05195	1.16671	PRS,PRS1,WOX3	Homeodomain-like superfamily protein
Cluster 1	HB-WOX	FvH4_5g02150	2.82616	4.48394	0.22098	PRS,PRS1,WOX3	Homeodomain-like superfamily protein
Cluster 1	HB-WOX	FvH4_5g17270	3.92695	6.57007	2.20395	WOX1	WUSCHEL related homeobox 1
Cluster 1	LOB	FvH4_2g21970	3.75447	3.67406	0.900204	ASL18,LBD16	lateral organ boundaries-domain 16
Cluster 1	LOB	FvH4_7g11980	6.51827	11.7046	4.44494	LBD31	LOB domain-containing protein 31
Cluster 1	LOB	FvH4_7g11990	4.12657	7.31666	1.09687	JLO,LBD30	Lateral organ boundaries (LOB) domain family protein
Cluster 1	MADS-MIKC	FvH4_1g19710	156.484	164.403	9.15876	AGL22,SVP	K-box region and MADS-box transcription factor family protein
Cluster 1	MADS-MIKC	FvH4_7g28690	2.24545	6.15087	0.376953	AGL6	AGAMOUS-like 6
Cluster 1	MYB	FvH4_1g02690	5.92836	6.3598	2.33566	AtMYB82,MYB82	myb domain protein 82
Cluster 1	MYB	FvH4_4g31000	34.0607	42.6264	9.38783	ATMIXTA,ATMYB16,MYB16	myb domain protein 16
Cluster 1	MYB	FvH4_4g31190	33.5621	34.93	15.6149	AtMYB117,LOF1,MYB117	myb domain protein 117
Cluster 1	MYB	FvH4_5g32320	16.4627	19.7098	8.15786	ATMYB3,MYB3	myb domain protein 3
Cluster 1	MYB	FvH4_6g08620	3.80491	6.33799	1.30609	ATMYB61,MYB61	myb domain protein 61
Cluster 1	SBP	FvH4_4g23520	6.30587	12.6079	2.8374		Squamosa promoter-binding protein-like (SBP domain) transcription factor family protein
Cluster 1	SBP	FvH4_7g10680	53.4202	60.1234	33.5842	SPL11	squamosa promoter-like 11
Cluster 1	TCP	FvH4_4g28170	9.64247	10.7021	0.811387	BRC2,TCP12	TCP domain protein 12
Cluster 1	Trihelix	FvH4_7g05970	4.81937	6.04661	0.180027	PTL	Duplicated homeodomain-like superfamily protein
Cluster 1	bHLH	FvH4_5g11950	2.87451	3.15169	0.32366	BEE3	BR enhanced expression 3
Cluster 1	bHLH	FvH4_5g35460	9.37557	12.6792	6.36405		basic helix-loop-helix (bHLH) DNA-binding superfamily protein
Cluster 1	bHLH	FvH4_6g11070	24.3919	28.7166	5.20657	APTX	APRATAXIN-like
Cluster 1	bHLH	FvH4_6g48970	5.61729	9.63953	2.73555		basic helix-loop-helix (bHLH) DNA-binding family protein
Cluster 1	bHLH	FvH4_7g24720	11.1791	12.1291	2.70638		basic helix-loop-helix (bHLH) DNA-binding superfamily protein
Cluster 2	AP2/ERF-AP2	FvH4_6g15180	43.231	80.9444	39.8829	RAP2.7,TOE1	related to AP2.7
Cluster 2	AP2/ERF-ERF	FvH4_1g05820	16.4944	35.1671	21.6585	TINY2	Integrase-type DNA-binding superfamily protein
Cluster 2	AP2/ERF-ERF	FvH4_1g16370	5.58516	15.8489	7.25801	DEAR2	DREB and EAR motif protein 2
Cluster 2	AP2/ERF-ERF	FvH4_7g26920	0.688485	4.51596	1.13186	ATERF-1,ERF-1	ethylene responsive element binding factor 1
Cluster 2	AP2/ERF-ERF	FvH4_7g26940	57.1205	148.426	76.3219		Integrase-type DNA-binding superfamily protein
Cluster 2	B3	FvH4_5g10410	1.34722	10.438	2.15923	NGA1	AP2/B3-like transcriptional factor family protein
Cluster 2	B3	FvH4_7g16760	4.05185	22.0459	6.59766		AP2/B3-like transcriptional factor family protein
Cluster 2	BES1	FvH4_3g17990	9.66661	22.4883	8.49129	BEH4	BES1/BZR1 homolog 4
Cluster 2	C2C2-GATA	FvH4_1g07390	0.0486223	13.6888	2.99976	CGA1,GATA22	cytokinin-responsive gata factor 1
Cluster 2	C2C2-GATA	FvH4_7g10740	36.6535	138.32	43.9611	GATA4	GATA transcription factor 4
Cluster 2	C2C2-YABBY	FvH4_7g11260	45.7925	276.428	129.571	AFO,FIL,YAB1	Plant-specific transcription factor YABBY family protein
Cluster 2	C2H2	FvH4_2g38560	11.1587	19.0425	9.84507		C2H2-like zinc finger protein
Cluster 2	C2H2	FvH4_3g21630	23.1434	46.2299	21.6379		zinc finger protein-related
Cluster 2	C2H2	FvH4_3g43040	22.3349	66.0648	15.6259	NTT,WIP2	C2H2-type zinc finger family protein
Cluster 2	C2H2	FvH4_4g36040	4.97581	8.49111	3.78085	AtIDD4,IDD4	indeterminate(ID)-domain 4
Cluster 2	GARP-G2-like	FvH4_4g35980	8.86968	16.6334	9.66357		Homeodomain-like superfamily protein
Cluster 2	GRAS	FvH4_1g17370	2.63344	12.4736	2.97437		GRAS family transcription factor
Cluster 2	GRF	FvH4_2g32670	43.9068	83.7739	53.5648	AtGRF1,GRF1	growth-regulating factor 1
Cluster 2	GRF	FvH4_5g10750	7.13645	15.0459	8.42632	AtGRF8,GRF8	growth-regulating factor 8
Cluster 2	HB-BELL	FvH4_1g14320	2.3649	6.64434	1.78377	BLH2,SAW1	BEL1-like homeodomain 2
Cluster 2	HB-BELL	FvH4_6g20350	4.58048	13.2304	7.17693	BLH1,EDA29	BEL1-like homeodomain 1
Cluster 2	HB-HD-ZIP	FvH4_7g13350	33.2815	70.5499	44.4948	AHDP,ANL2	Homeobox-leucine zipper family protein / lipid-binding START domain-containing protein
Cluster 2	HB-KNOX	FvH4_2g28300	5.35606	11.2297	5.5462	KNAT3	KNOTTED1-like homeobox gene 3
Cluster 2	HB-other	FvH4_3g06360	2.78716	40.0986	4.18946	ATHB40,HB-5,HB40	homeobox protein 40
Cluster 2	LFY	FvH4_5g09660	50.0911	379.455	58.3932	LFY,LFY3	floral meristem identity control protein LEAFY (LFY)
Cluster 2	LOB	FvH4_1g15510	4.8644	16.5141	2.24027	ASL1,LBD36	ASYMMETRIC LEAVES 2-like 1
Cluster 2	LOB	FvH4_2g33260	1.3911	8.73068	1.87903	LBD39	LOB domain-containing protein 39
Cluster 2	MADS-MIKC	FvH4_3g03630	5.93729	17.8398	2.2577	AGL24	AGAMOUS-like 24
Cluster 2	MADS-MIKC	FvH4_4g29600	33.0075	396.151	73.23	AGL7,AP1	K-box region and MADS-box transcription factor family protein
Cluster 2	MADS-MIKC	FvH4_6g46410	25.7637	104.437	41.4594	AGL8,FUL	AGAMOUS-like 8
Cluster 2	MYB	FvH4_2g32340	4.22312	9.86785	5.93748	ATMYB68,MYB68	myb domain protein 68
Cluster 2	MYB	FvH4_5g06070	1.44874	3.27616	1.43644	ATMYB86,MYB86	myb domain protein 86
Cluster 2	MYB	FvH4_5g14970	5.62898	13.9619	6.10088	ATMYB94,ATMYBCP70,MYB94	myb domain protein 94
Cluster 2	MYB	FvH4_6g11950	4.73348	16.8728	7.89723		Duplicated homeodomain-like superfamily protein
Cluster 2	NAC	FvH4_3g04630	0.311986	2.00187	0.53345	anac025,NAC025	NAC domain containing protein 25
Cluster 2	OFP	FvH4_2g23310	8.63034	29.9434	12.7154	ATOFP16,OFP16	ovate family protein 16
Cluster 2	OFP	FvH4_6g19870	16.067	28.3981	14.1211	ATOFP13,OFP13	ovate family protein 13
Cluster 2	OFP	FvH4_6g19871	11.5348	25.4258	11.0372	ATOFP6,OFP6	ovate family protein 6
Cluster 2	SBP	FvH4_3g08880	7.86532	39.3053	15.1879	SPL3	squamosa promoter binding protein-like 3
Cluster 2	SBP	FvH4_3g19650	18.643	75.6821	13.6055	SPL4	squamosa promoter binding protein-like 4
Cluster 2	SBP	FvH4_6g22640	92.5796	155.794	69.9798	SPL9	squamosa promoter binding protein-like 9
Cluster 2	SRS	FvH4_2g38950	13.8506	50.6199	12.1591	SRS7	SHI-related sequence 7
Cluster 2	TCP	FvH4_6g45410	0.781091	2.56238	0.19953	TCP1	TCP family transcription factor
Cluster 2	TCP	FvH4_6g46730	7.94267	24.9876	2.86117	PTF1,TCP13,TFPD	plastid transcription factor 1
Cluster 2	TCP	FvH4_7g12810	8.53212	15.7994	9.2716		TCP family transcription factor
Cluster 2	WRKY	FvH4_3g06200	1.36198	10.5436	4.06846	ATWRKY28,WRKY28	WRKY DNA-binding protein 28
Cluster 2	WRKY	FvH4_6g09750	4.49735	16.9366	7.02071	ATWRKY70,WRKY70	WRKY DNA-binding protein 70
Cluster 2	WRKY	FvH4_6g42870	1.37518	5.22545	1.10858	ATWRKY6,WRKY6	WRKY family transcription factor
Cluster 2	WRKY	FvH4_7g15350	5.04412	9.38971	3.85113	AtWRKY22,WRKY22	WRKY family transcription factor
Cluster 2	bHLH	FvH4_3g09050	5.47177	13.0108	2.66594		basic helix-loop-helix (bHLH) DNA-binding superfamily protein
Cluster 2	bHLH	FvH4_5g09300	47.7424	101.991	66.1425	ATICE1,ICE1,SCRM	basic helix-loop-helix (bHLH) DNA-binding superfamily protein
Cluster 2	bHLH	FvH4_5g22360	4.34754	25.2785	9.62071	bHLH071	beta HLH protein 71
Cluster 2	zf-HD	FvH4_6g48610	38.1074	70.5952	49.7537	ATHB30,HB30,ZFHD3	homeobox protein 30
Cluster 3	AP2/ERF-AP2	FvH4_1g18270	88.2826	83.7	38.9356	ANT,CKC,CKC1,DRG	Integrase-type DNA-binding superfamily protein
Cluster 3	AP2/ERF-ERF	FvH4_4g22650	25.0769	22.954	6.64266		Integrase-type DNA-binding superfamily protein
Cluster 3	AP2/ERF-ERF	FvH4_7g20380	19.5103	9.52801	2.90219	RAP2.7,TOE1	related to AP2.7
Cluster 3	C2C2-Dof	FvH4_1g14970	69.7295	53.8511	29.6904		Dof-type zinc finger DNA-binding family protein
Cluster 3	C2C2-Dof	FvH4_7g22180	20.9864	13.3676	8.18366	OBP3	OBF-binding protein 3
Cluster 3	C2H2	FvH4_c6g00070	8.73542	3.70912	0.608716	AtIDD2,IDD2	indeterminate(ID)-domain 2
Cluster 3	GARP-G2-like	FvH4_6g26660	10.871	8.34347	2.89471	ATGLK1,GLK1,GPRI1	GBF's pro-rich region-interacting factor 1
Cluster 3	HB-KNOX	FvH4_2g32400	85.5415	55.3595	41.8482	BP,BP1,KNAT1	KNOTTED-like from Arabidopsis thaliana
Cluster 3	HB-KNOX	FvH4_6g42570	252.842	146.476	99.8177	BUM,BUM1,SHL,STM,WAM,WAM1	KNOX/ELK homeobox transcription factor
Cluster 3	HB-other	FvH4_3g19270	3.1558	1.63069	0.956567	ATHB52,HB52	homeobox protein 52
Cluster 3	HSF	FvH4_1g07800	12.5515	7.99326	5.56119	ATHSFA2,HSFA2	heat shock transcription factor A2
Cluster 3	MYB	FvH4_3g30950	6.51468	4.89597	0.406093	AtMYB36,MYB36	myb domain protein 36
Cluster 3	MYB	FvH4_5g14661	8.86033	6.10052	0.567092	AtMYB106,MYB106,NOK	myb domain protein 106
Cluster 3	MYB	FvH4_6g16480	9.2555	6.63006	3.54448	ATMYB68,MYB68	myb domain protein 68
Cluster 3	MYB	FvH4_6g34670	22.3049	14.2812	6.69095	ATGL1,ATMYB0,GL1,MYB0	myb domain protein 0
Cluster 3	SBP	FvH4_4g29640	22.6373	14.8823	7.90669		Squamosa promoter-binding protein-like (SBP domain) transcription factor family protein
Cluster 3	WRKY	FvH4_4g30640	4.44937	2.48949	1.43366	WRKY3	WRKY DNA-binding protein 3
Cluster 3	bHLH	FvH4_5g05180	8.84888	2.89974	0.868637		basic helix-loop-helix (bHLH) DNA-binding superfamily protein
Cluster 3	bHLH	FvH4_5g31910	28.1583	14.1117	7.59551		basic helix-loop-helix (bHLH) DNA-binding superfamily protein
Cluster 3	bHLH	FvH4_6g05440	98.5813	60.8455	25.9384		basic helix-loop-helix (bHLH) DNA-binding superfamily protein
Cluster 3	bHLH	FvH4_7g00670	8.00766	4.82586	3.39712		basic helix-loop-helix (bHLH) DNA-binding superfamily protein
Cluster 3	bZIP	FvH4_1g11270	153.315	94.5502	26.4997	atbzip14,FD,FD-1	Basic-leucine zipper (bZIP) transcription factor family protein
Cluster 4	AP2/ERF-AP2	FvH4_1g16350	107.824	12.6705	21.2719	AP2,FL1,FLO2	Integrase-type DNA-binding superfamily protein
Cluster 4	AP2/ERF-ERF	FvH4_1g09180	123.283	30.3066	25.9014		Integrase-type DNA-binding superfamily protein
Cluster 4	AP2/ERF-ERF	FvH4_2g32640	129.344	59.2019	64.714	ANT,CKC,CKC1,DRG	Integrase-type DNA-binding superfamily protein
Cluster 4	AP2/ERF-ERF	FvH4_6g24090	52.2431	19.4726	25.9082		Integrase-type DNA-binding superfamily protein
Cluster 4	B3	FvH4_1g14680	12.5942	0.937091	2.41158	REM39,VRN1	AP2/B3-like transcriptional factor family protein
Cluster 4	C2C2-Dof	FvH4_3g07790	3.24767	1.3493	0.849207		Dof-type zinc finger DNA-binding family protein
Cluster 4	C2C2-Dof	FvH4_3g08900	10.5918	3.23474	1.61625	OBP4	OBF binding protein 4
Cluster 4	C2C2-Dof	FvH4_5g05330	38.3113	13.631	9.95363	DOF5.6,HCA2	Dof-type zinc finger DNA-binding family protein
Cluster 4	C2H2	FvH4_2g40850	7.85398	2.42644	1.55447		C2H2 and C2HC zinc fingers superfamily protein
Cluster 4	C2H2	FvH4_4g28010	13.3145	3.11432	1.95547	DOT5,WIP6	C2H2-like zinc finger protein
Cluster 4	C2H2	FvH4_6g33550	6.84383	2.24664	2.05513	AtIDD7,IDD7	indeterminate(ID)-domain 7
Cluster 4	C3H	FvH4_6g43530	32.3822	12.3658	17.0627		Zinc finger C-x8-C-x5-C-x3-H type family protein
Cluster 4	GARP-G2-like	FvH4_3g01830	9.40568	1.50549	2.84562		Homeodomain-like superfamily protein
Cluster 4	GARP-G2-like	FvH4_4g31230	99.5699	14.66	26.7121		Homeodomain-like superfamily protein
Cluster 4	HB-WOX	FvH4_2g34030	15.4421	7.82118	5.92068	WOX4	WUSCHEL related homeobox 4
Cluster 4	LOB	FvH4_6g51300	4.15593	1.32327	0.468888	LBD25	LOB domain-containing protein 25
Cluster 4	MADS-MIKC	FvH4_4g27110	240.794	82.2743	117.318	AGL22,SVP	K-box region and MADS-box transcription factor family protein
Cluster 4	MADS-MIKC	FvH4_4g27440	122.24	7.46236	10.9678	AGL22,SVP	K-box region and MADS-box transcription factor family protein
Cluster 4	MADS-MIKC	FvH4_6g53741	3.46503	0.592084	0.35293	AGL7,AP1	K-box region and MADS-box transcription factor family protein
Cluster 4	MADS-MIKC	FvH4_7g12700	149.371	35.2169	10.8624	AGL20,ATSOC1,SOC1	AGAMOUS-like 20
Cluster 4	MADS-MIKC	FvH4_7g28740	41.8963	11.076	1.36469	AGL42	AGAMOUS-like 42
Cluster 4	MYB	FvH4_1g08390	2.12665	0.133577	0.587191	ATMYB123,ATTT2,MYB123,TT2	Duplicated homeodomain-like superfamily protein
Cluster 4	MYB	FvH4_2g35010	51.7451	28.0764	25.0971	ATMYB73,MYB73	myb domain protein 73
Cluster 4	MYB	FvH4_2g36950	499.843	209.842	266.665	ATMYB3,MYB3	myb domain protein 3
Cluster 4	MYB	FvH4_4g31660	11.4241	4.42826	4.29026	AtMYB124,FLP,MYB124	Duplicated homeodomain-like superfamily protein
Cluster 4	MYB	FvH4_5g27870	47.0827	5.40536	8.88334	AtMYB117,LOF1,MYB117	myb domain protein 117
Cluster 4	MYB-related	FvH4_2g08910	834.696	14.9448	20.9342	ATRL2,MEE3,RSM1	Homeodomain-like superfamily protein
Cluster 4	NAC	FvH4_2g16180	9.89535	2.22319	1.44929	anac036,NAC036	NAC domain containing protein 36
Cluster 4	NAC	FvH4_7g17950	3.63564	0.176655	1.12422	anac028,NAC028	NAC domain containing protein 28
Cluster 4	NAC	FvH4_7g18000	5.03063	0.410456	0.773874	anac028,NAC028	NAC domain containing protein 28
Cluster 4	NAC	FvH4_7g18020	2.36658	0.267901	0.766648	NTL9	NAC transcription factor-like 9
Cluster 4	NAC	FvH4_7g18260	5.85316	0.341	1.71732	anac028,NAC028	NAC domain containing protein 28
Cluster 4	NF-YC	FvH4_6g05540	84.4855	24.2533	6.48835	HAP5C,NF-YC9	nuclear factor Y, subunit C9
Cluster 4	OFP	FvH4_6g10140	24.0357	8.16449	3.0066	ATOFP4,OFP4	ovate family protein 4
Cluster 4	SBP	FvH4_6g53760	141.01	17.28	19.534		Squamosa promoter-binding protein-like (SBP domain) transcription factor family protein
Cluster 4	SRS	FvH4_2g10010	21.7032	5.34343	6.15135	SRS3	SHI-related sequence3
Cluster 4	WRKY	FvH4_1g22820	9.40374	0.573391	1.79347	ATWRKY51,WRKY51	WRKY DNA-binding protein 51
Cluster 4	WRKY	FvH4_5g39060	79.5262	27.9348	22.8331	AtWRKY35,MEE24,WRKY35	WRKY DNA-binding protein 35
Cluster 4	WRKY	FvH4_7g16150	75.4169	36.634	32.1274	ATWRKY46,WRKY46	WRKY DNA-binding protein 46
Cluster 4	WRKY	FvH4_7g26030	83.9328	10.3616	7.63203	ATWRKY70,WRKY70	WRKY DNA-binding protein 70
Cluster 4	bHLH	FvH4_1g20160	28.5404	10.2966	5.86242		basic helix-loop-helix (bHLH) DNA-binding superfamily protein
Cluster 4	bHLH	FvH4_2g19790	25.8047	10.9442	13.5156	PIF1,PIL5	phytochrome interacting factor 3-like 5
Cluster 4	bHLH	FvH4_5g15240	2.46655	0.55462	0	BHLH161,BNQ3	BANQUO 3
Cluster 4	bHLH	FvH4_5g33810	48.6713	7.36642	10.8886	bHLH093	beta HLH protein 93
Cluster 4	bHLH	FvH4_5g36240	101.451	38.3885	52.9156		basic helix-loop-helix (bHLH) DNA-binding superfamily protein
Cluster 4	bHLH	FvH4_6g08610	34.4574	15.3004	16.4603	PAP3,PIF3,POC1	phytochrome interacting factor 3
Cluster 4	bHLH	FvH4_7g13190	4.92038	1.76319	2.57857		basic helix-loop-helix (bHLH) DNA-binding superfamily protein
Cluster 4	bHLH	FvH4_7g17380	25.8768	5.84803	6.32948		basic helix-loop-helix (bHLH) DNA-binding superfamily protein
Cluster 4	bZIP	FvH4_2g38080	18.2056	0.168113	0.53076	atbzip14,FD,FD-1	Basic-leucine zipper (bZIP) transcription factor family protein
Cluster 4	bZIP	FvH4_2g39350	97.4312	29.7656	43.6412	AtbZIP44,bZIP44	basic leucine-zipper 44
Cluster 4	bZIP	FvH4_6g46000	4.24447	0.689755	0.469562	ATBZIP42,bZIP42	basic leucine-zipper 42
Cluster 5	AP2/ERF-ERF	FvH4_6g32030	7.6696	2.80401	5.50005	TINY2	Integrase-type DNA-binding superfamily protein
Cluster 5	B3	FvH4_1g14670	148.302	15.8378	64.9807	REM39,VRN1	AP2/B3-like transcriptional factor family protein
Cluster 5	B3	FvH4_2g06300	28.4217	10.6809	20.7619		AP2/B3-like transcriptional factor family protein
Cluster 5	B3	FvH4_7g07610	22.0021	8.2164	15.6011	REM39,VRN1	AP2/B3-like transcriptional factor family protein
Cluster 5	B3-ARF	FvH4_1g27650	57.8846	22.9835	47.9253	ARF8,ATARF8	auxin response factor 8
Cluster 5	C2H2	FvH4_6g28840	14.8784	1.89693	13.884		C2H2 and C2HC zinc fingers superfamily protein
Cluster 5	GARP-ARR-B	FvH4_2g40890	18.0027	5.73776	11.4789	ARR12,RR12	response regulator 12
Cluster 5	GARP-G2-like	FvH4_2g06880	36.2798	10.5533	28.635		Homeodomain-like superfamily protein
Cluster 5	GARP-G2-like	FvH4_2g40620	7.37101	1.72872	6.34689	ATS,KAN4	Homeodomain-like superfamily protein
Cluster 5	GARP-G2-like	FvH4_5g23660	49.3609	20.9655	45.4185		Homeodomain-like superfamily protein
Cluster 5	HB-BELL	FvH4_2g32060	41.961	14.0733	33.1794	ATH1	homeobox gene 1
Cluster 5	HB-HD-ZIP	FvH4_1g18530	55.0369	23.0823	53.2451	HAT22	Homeobox-leucine zipper protein family
Cluster 5	HB-HD-ZIP	FvH4_2g32410	2.29968	0.111365	0.875956	HAT9	Homeobox-leucine zipper protein family
Cluster 5	HRT	FvH4_1g07150	79.1808	11.2749	32.1711	ATET2,ET2	effector of transcription2
Cluster 5	LOB	FvH4_3g11810	40.6776	13.1573	23.2987	LBD4	LOB domain-containing protein 4
Cluster 5	MYB	FvH4_4g32290	17.4825	4.63652	10.0191	ATMYB4,MYB4	myb domain protein 4
Cluster 5	MYB-related	FvH4_5g05280	121.673	40.1858	100.919	ATMYB66,MYB66,WER,WER1	myb domain protein 66
Cluster 5	MYB-related	FvH4_7g31070	29.6983	7.25052	16.9699	TRY	Homeodomain-like superfamily protein
Cluster 5	NAC	FvH4_7g18210	4.7432	1.50329	3.55834	anac028,NAC028	NAC domain containing protein 28
Cluster 5	NAC	FvH4_7g18250	7.64473	2.26075	5.42845	anac096,NAC096	NAC domain containing protein 96
Cluster 5	OFP	FvH4_4g15660	23.9638	3.79126	11.2908	ATOFP16,OFP16	ovate family protein 16
Cluster 5	Tify	FvH4_4g23000	69.1468	19.6095	39.307	JAS1,JAZ10,TIFY9	jasmonate-zim-domain protein 10
Cluster 5	WRKY	FvH4_1g23082	43.0961	15.7133	38.6367	ATWRKY13,WRKY13	WRKY DNA-binding protein 13
Cluster 5	WRKY	FvH4_7g10440	16.3573	6.46949	12.5456		WRKY family transcription factor
Cluster 5	WRKY	FvH4_7g26071	19.6788	8.79804	18.3338		Disease resistance protein (TIR-NBS-LRR class) family
Cluster 5	bHLH	FvH4_3g22180	30.4644	13.7985	25.0648		basic helix-loop-helix (bHLH) DNA-binding superfamily protein
Cluster 5	bHLH	FvH4_4g12760	13.6254	6.17129	9.07705		basic helix-loop-helix (bHLH) DNA-binding superfamily protein
Cluster 5	bZIP	FvH4_2g05900	18.1331	7.72262	16.0181	ABF4,AREB2	ABRE binding factor 4
Cluster 5	bZIP	FvH4_2g36400	16.6568	6.14578	11.5343	ATBZIP9,BZIP9,BZO2H2	basic leucine zipper 9
Cluster 5	bZIP	FvH4_3g24830	6.29214	2.33798	4.3362	bZIP21,TGA9	bZIP transcription factor family protein
Cluster 6	AP2/ERF-ERF	FvH4_2g13240	0.478975	2.76332	2.0751		Integrase-type DNA-binding superfamily protein
Cluster 6	AP2/ERF-ERF	FvH4_5g04470	27.2985	59.9452	42.7278		Integrase-type DNA-binding superfamily protein
Cluster 6	AP2/ERF-ERF	FvH4_6g29010	3.32071	16.3737	10.7541		Integrase-type DNA-binding superfamily protein
Cluster 6	B3	FvH4_5g16850	1.14213	9.39224	6.07149	REM39,VRN1	AP2/B3-like transcriptional factor family protein
Cluster 6	BES1	FvH4_1g14040	75.2968	224.152	165.915	BZR1	Brassinosteroid signalling positive regulator (BZR1) family protein
Cluster 6	C2C2-Dof	FvH4_1g14790	190.405	404.598	337.577	OBP1	OBF binding protein 1
Cluster 6	C2C2-Dof	FvH4_2g40660	48.8985	100.531	96.9095		Dof-type zinc finger DNA-binding family protein
Cluster 6	C2C2-GATA	FvH4_6g07120	11.7137	75.2722	53.0942	GATA15	GATA transcription factor 15
Cluster 6	C2C2-GATA	FvH4_6g32190	23.1322	50.6272	38.1105	GATA9	GATA transcription factor 9
Cluster 6	C2H2	FvH4_2g04120	6.13744	15.8158	13.9552	STZ,ZAT10	salt tolerance zinc finger
Cluster 6	C2H2	FvH4_7g21880	0.0222417	8.16445	6.16575		C2H2 and C2HC zinc fingers superfamily protein
Cluster 6	C3H	FvH4_2g13890	10.0571	23.9536	18.6752		Inositol monophosphatase family protein
Cluster 6	FAR1	FvH4_7g29092	1.04299	3.07568	2.06579	FRS5	FAR1-related sequence 5
Cluster 6	GARP-G2-like	FvH4_3g36890	13.9189	25.491	22.5676	LUX,PCL1	Homeodomain-like superfamily protein
Cluster 6	HB-HD-ZIP	FvH4_3g02520	38.2234	71.8689	64.0377	PDF2	protodermal factor 2
Cluster 6	HB-HD-ZIP	FvH4_6g43390	33.9247	69.8892	65.8082	HDG2	homeodomain GLABROUS 2
Cluster 6	HB-HD-ZIP	FvH4_7g09820	54.7191	91.7917	81.2174	HAT3	homeobox-leucine zipper protein 3
Cluster 6	HB-KNOX	FvH4_3g04270	1.9505	4.8067	4.46126	BUM,BUM1,SHL,STM,WAM,WAM1	KNOX/ELK homeobox transcription factor
Cluster 6	HB-other	FvH4_1g13930	0.857906	63.7282	49.6683	ATHB40,HB-5,HB40	homeobox protein 40
Cluster 6	HSF	FvH4_1g04810	1.19918	5.6926	4.10797	AT-HSFC1,HSFC1	heat shock transcription factor C1
Cluster 6	MADS-MIKC	FvH4_1g12260	0.153756	14.1107	9.62677	AP3,ATAP3	K-box region and MADS-box transcription factor family protein
Cluster 6	MADS-MIKC	FvH4_2g27860	0.158377	42.8514	24.6321	PI	K-box region and MADS-box transcription factor family protein
Cluster 6	MADS-MIKC	FvH4_2g27870	0	25.7259	19.0364	PI	K-box region and MADS-box transcription factor family protein
Cluster 6	MADS-MIKC	FvH4_3g11290	11.1363	72.6389	39.8511	AGL6	AGAMOUS-like 6
Cluster 6	MADS-MIKC	FvH4_4g29610	4.78631	25.9824	20.2617	AGL3,SEP4	K-box region and MADS-box transcription factor family protein
Cluster 6	MADS-MIKC	FvH4_5g13500	11.6003	74.6627	54.2623	AGL8,FUL	AGAMOUS-like 8
Cluster 6	MADS-MIKC	FvH4_5g13510	2.72754	259.487	214.386	AGL2,SEP1	K-box region and MADS-box transcription factor family protein
Cluster 6	MYB	FvH4_3g38150	47.5918	107.675	74.0955		Homeodomain-like transcriptional regulator
Cluster 6	MYB	FvH4_6g13640	59.3455	120.649	89.2744	AS1,ATMYB91,ATPHAN,MYB91	myb-like HTH transcriptional regulator family protein
Cluster 6	MYB	FvH4_6g38680	11.8223	25.2282	18.449	ATMYB66,MYB66,WER,WER1	myb domain protein 66
Cluster 6	MYB	FvH4_6g48110	18.997	47.0724	34.286	ATMIXTA,ATMYB16,MYB16	myb domain protein 16
Cluster 6	MYB	FvH4_6g48630	23.0649	68.7003	56.7062	ATMYB30,MYB30	myb domain protein 30
Cluster 6	NAC	FvH4_6g06070	20.2505	92.9914	85.2328	ANAC098,ATCUC2,CUC2	NAC (No Apical Meristem) domain transcriptional regulator superfamily protein
Cluster 6	SBP	FvH4_5g08580	11.1608	26.7944	18.247		Squamosa promoter-binding protein-like (SBP domain) transcription factor family protein
Cluster 6	TCP	FvH4_4g31520	5.0251	13.4002	10.5224	AtTCP14,TCP14	TEOSINTE BRANCHED, cycloidea and PCF (TCP) 14
Cluster 6	TUB	FvH4_2g39640	4.73948	11.4437	8.74333	AtTLP6,TLP6	tubby like protein 6
Cluster 6	bHLH	FvH4_5g15220	2.63784	24.1132	19.5528	BHLH161,BNQ3	BANQUO 3
Cluster 6	zf-HD	FvH4_5g35900	49.8328	127.981	90.5426	ATHB22,HB22,MEE68	homeobox protein 22
Cluster 7	AP2/ERF-ERF	FvH4_5g12940	0.791263	1.79185	3.95929	RAP2.11	related to AP2 11
Cluster 7	AP2/ERF-ERF	FvH4_7g16810	0.939827	2.20707	6.67393		Integrase-type DNA-binding superfamily protein
Cluster 7	AP2/ERF-ERF	FvH4_7g24760	0.0153557	1.89022	7.70318	ABI4,ATABI4,GIN6,ISI3,SAN5,SIS5,SUN6	Integrase-type DNA-binding superfamily protein
Cluster 7	B3	FvH4_1g14620	1.27115	2.81763	28.2875		AP2/B3-like transcriptional factor family protein
Cluster 7	B3	FvH4_1g14630	0.15566	0.90945	15.2754	RTV1	related to vernalization1 1
Cluster 7	B3	FvH4_1g14660	14.05	15.519	35.9459	REM39,VRN1	AP2/B3-like transcriptional factor family protein
Cluster 7	B3	FvH4_2g06330	3.75664	5.39145	11.6512		AP2/B3-like transcriptional factor family protein
Cluster 7	B3	FvH4_2g07300	4.63563	4.88721	15.0985		AP2/B3-like transcriptional factor family protein
Cluster 7	B3	FvH4_2g27400	0.0793889	7.29157	38.5343		Transcriptional factor B3 family protein
Cluster 7	B3	FvH4_3g34770	0.626805	0.24265	7.12318	REM39,VRN1	AP2/B3-like transcriptional factor family protein
Cluster 7	B3	FvH4_5g07280	24.2966	20.4536	58.1996		AP2/B3-like transcriptional factor family protein
Cluster 7	B3	FvH4_6g19560	6.56304	8.64493	21.6034		AP2/B3-like transcriptional factor family protein
Cluster 7	B3	FvH4_7g04060	0.0398208	0.181638	4.38759	REM39,VRN1	AP2/B3-like transcriptional factor family protein
Cluster 7	B3	FvH4_7g07720	286.985	245.351	685.183		AP2/B3-like transcriptional factor family protein
Cluster 7	B3	FvH4_7g12870	0.9857	1.263	6.94399		AP2/B3-like transcriptional factor family protein
Cluster 7	B3	FvH4_7g12880	1.94975	2.53675	4.50016		Transcriptional factor B3 family protein
Cluster 7	C2C2-CO-like	FvH4_4g27390	0.766813	0.53618	2.57858		B-box type zinc finger protein with CCT domain
Cluster 7	C2C2-LSD	FvH4_5g21750	1.14849	3.25787	7.18804	LOL1	lsd one like 1
Cluster 7	C2C2-YABBY	FvH4_4g29650	0.181123	0.334131	433.334	ATUTR2,UTR2	UDP-galactose transporter 2
Cluster 7	C2H2	FvH4_2g22040	0	0.0497923	4.05007	ATZFP11,ZFP11	zinc finger protein 11
Cluster 7	C2H2	FvH4_3g38290	5.38092	8.29963	13.3997		zinc finger (C2H2 type) family protein
Cluster 7	CSD	FvH4_2g26420	3.11855	5.62878	13.8931	CSDP1	cold shock domain protein 1
Cluster 7	GARP-G2-like	FvH4_6g36430	16.6158	24.0308	37.6298		myb-like HTH transcriptional regulator family protein
Cluster 7	GRAS	FvH4_3g41310	3.8837	9.07891	19.9437	LAS,SCL18	GRAS family transcription factor
Cluster 7	GRF	FvH4_7g32780	11.4501	25.5709	49.307	AtGRF7,GRF7	growth-regulating factor 7
Cluster 7	HB-KNOX	FvH4_6g07460	289.618	363.015	794.459	KNAT6,KNAT6L,KNAT6S	KNOTTED1-like homeobox gene 6
Cluster 7	HB-WOX	FvH4_3g04400	0.29136	9.98089	56.1085	PGA6,WUS,WUS1	Homeodomain-like superfamily protein
Cluster 7	HB-WOX	FvH4_3g35730	0.156124	2.48503	14.3865	WOX2	WUSCHEL related homeobox 2
Cluster 7	LFY	FvH4_3g03530	0.855108	18.803	141.881	LFY,LFY3	floral meristem identity control protein LEAFY (LFY)
Cluster 7	MADS-MIKC	FvH4_3g06720	0.726885	7.32768	229.496	AG	K-box region and MADS-box transcription factor family protein
Cluster 7	MADS-MIKC	FvH4_6g37880	1.5782	0.673818	113.984	AGL1,SHP1	K-box region and MADS-box transcription factor family protein
Cluster 7	MYB-related	FvH4_2g39660	35.137	31.4255	154.618	ATRL6,RL6,RSM3	RAD-like 6
Cluster 7	NAC	FvH4_3g03540	0.016464	5.566	38.4367	ANAC098,ATCUC2,CUC2	NAC (No Apical Meristem) domain transcriptional regulator superfamily protein
Cluster 7	NAC	FvH4_4g23130	76.0583	121.989	197.534	ANAC083,NAC083,VNI2	NAC domain containing protein 83
Cluster 7	NAC	FvH4_5g25960	31.7518	65.8665	138.766	ANAC031,CUC3,NAC368	NAC (No Apical Meristem) domain transcriptional regulator superfamily protein
Cluster 7	NAC	FvH4_5g37880	0.40414	0.978268	4.05495	anac047,NAC047	NAC domain containing protein 47
Cluster 7	NAC	FvH4_5g37900	0.812613	1.56705	5.31816	ANAC002,ATAF1	NAC (No Apical Meristem) domain transcriptional regulator superfamily protein
Cluster 7	NAC	FvH4_6g48120	0.485244	14.0942	42.3265	ANAC100,ATNAC5,NAC100	NAC domain containing protein 100
Cluster 7	NF-YA	FvH4_6g34360	1.22078	5.61356	26.9636	ATHAP2C,HAP2C,NF-YA3	nuclear factor Y, subunit A3
Cluster 7	ULT	FvH4_6g44900	81.8491	122.244	191.48	ULT,ULT1	Developmental regulator, ULTRAPETALA
Cluster 7	WRKY	FvH4_1g26980	9.15073	3.31632	40.4446	ATWRKY23,WRKY23	WRKY DNA-binding protein 23
Cluster 7	WRKY	FvH4_7g28550	1.05928	0.227337	3.95799		Disease resistance protein (TIR-NBS-LRR class) family
Cluster 7	bHLH	FvH4_1g16230	13.1123	17.434	29.3047	SPT	basic helix-loop-helix (bHLH) DNA-binding superfamily protein
Cluster 7	bHLH	FvH4_1g18930	123.672	103.967	231.885	bHLH093	beta HLH protein 93
Cluster 7	bHLH	FvH4_3g04290	3.07208	14.9448	132.729		basic helix-loop-helix (bHLH) DNA-binding family protein
Cluster 7	bHLH	FvH4_4g28910	35.0682	37.8161	88.9845		basic helix-loop-helix (bHLH) DNA-binding superfamily protein
Cluster 7	bZIP	FvH4_5g38390	1.88058	2.81138	6.22261		bZIP transcription factor family protein
Cluster 8	AP2/ERF-ERF	FvH4_4g25630	2.80565	15.8368	19.2186	DRN-LIKE,DRNL,ESR2,SOB2	DORNROSCHEN-like
Cluster 8	AP2/ERF-ERF	FvH4_7g15860	1.44576	5.07657	7.44172	CRF4	cytokinin response factor 4
Cluster 8	B3	FvH4_1g14650	6.81916	13.219	16.4612	REM39,VRN1	AP2/B3-like transcriptional factor family protein
Cluster 8	B3	FvH4_2g40960	28.2092	130.609	138.695		Transcriptional factor B3 family protein
Cluster 8	B3	FvH4_4g19990	3.61271	11.435	23.0568	VDD	VERDANDI
Cluster 8	B3	FvH4_6g35581	45.7716	82.6681	132.365		AP2/B3-like transcriptional factor family protein
Cluster 8	B3	FvH4_6g38700	1.85694	3.08495	4.73702	REM39,VRN1	AP2/B3-like transcriptional factor family protein
Cluster 8	B3	FvH4_7g17930	1.83298	5.09134	5.57404	NGA1	AP2/B3-like transcriptional factor family protein
Cluster 8	B3-ARF	FvH4_3g08450	49.516	100.309	118.283	ARF3,ETT	Transcriptional factor B3 family protein / auxin-responsive factor AUX/IAA-related
Cluster 8	C2C2-Dof	FvH4_1g19310	12.261	23.7398	31.3952		Dof-type zinc finger DNA-binding family protein
Cluster 8	C2H2	FvH4_1g13820	0.575794	2.23491	3.2051		F-box family protein
Cluster 8	C2H2	FvH4_2g34000	6.99373	12.0465	15.3784		C2H2-like zinc finger protein
Cluster 8	C2H2	FvH4_4g03010	0.0442849	4.99561	5.39877	FLO10,FON1,SUP	C2H2 and C2HC zinc fingers superfamily protein
Cluster 8	C2H2	FvH4_4g30350	0.0590957	1.20878	2.54274		C2H2-like zinc finger protein
Cluster 8	C2H2	FvH4_5g19030	6.29327	16.7849	20.6854		C2H2-like zinc finger protein
Cluster 8	DBP	FvH4_2g29850	23.0178	43.198	44.1532	AtDBP1,DBP1	DNA-binding protein phosphatase 1
Cluster 8	GARP-ARR-B	FvH4_1g01300	2.1415	6.65848	9.59388	ARR12,RR12	response regulator 12
Cluster 8	HB-BELL	FvH4_7g23561	25.96	50.0583	80.6978	BLH9,BLR,HB-6,LSN,PNY,RPL,VAN	POX (plant homeobox) family protein
Cluster 8	HB-HD-ZIP	FvH4_4g32460	3.76074	6.58489	8.87514	ATHB-17,ATHB17,HB17	homeobox-leucine zipper protein 17
Cluster 8	HB-HD-ZIP	FvH4_6g49000	6.25461	44.9061	51.6615	ATHB-3,ATHB3,HAT7,HB-3	homeobox 3
Cluster 8	HB-KNOX	FvH4_1g01720	27.4421	85.7022	141.185	KNAT3	KNOTTED1-like homeobox gene 3
Cluster 8	HB-KNOX	FvH4_5g01260	15.7676	42.2819	43.4547	IXR11,KNAT7	KNOTTED-like homeobox of Arabidopsis thaliana 7
Cluster 8	HB-WOX	FvH4_3g10130	2.33672	20.7936	29.1437	STPL,WOX8	WUSCHEL related homeobox 8
Cluster 8	LFY	FvH4_3g04170	3.77671	10.9036	14.3032	LFY,LFY3	floral meristem identity control protein LEAFY (LFY)
Cluster 8	MADS-MIKC	FvH4_2g38970	2.63442	75.2003	102.449	AP3,ATAP3	K-box region and MADS-box transcription factor family protein
Cluster 8	MADS-MIKC	FvH4_6g46420	3.057	26.9909	36.6594	AGL4,SEP2	K-box region and MADS-box transcription factor family protein
Cluster 8	MADS-MIKC	FvH4_7g12670	0.14013	47.1794	73.6106	AGL6	AGAMOUS-like 6
Cluster 8	MYB	FvH4_4g27090	1.85893	6.60703	8.13415	AtMYB62,BW62B,BW62C,MYB62	myb domain protein 62
Cluster 8	MYB-related	FvH4_4g35340	2.4746	4.58225	5.48787		myb-like transcription factor family protein
Cluster 8	NAC	FvH4_3g20690	8.46589	90.5153	113.428	ANAC072,RD26	NAC (No Apical Meristem) domain transcriptional regulator superfamily protein
Cluster 8	NAC	FvH4_4g31070	2.58001	41.3547	48.2226	ANAC029,ATNAP,NAP	NAC-like, activated by AP3/PI
Cluster 8	OFP	FvH4_1g13640	59.2542	97.7467	128.105	ATOFP7,OFP7	ovate family protein 7
Cluster 8	SRS	FvH4_3g27920	4.14982	15.035	22.3714	LRP1	Lateral root primordium (LRP) protein-related
Cluster 8	SRS	FvH4_7g03110	16.0265	30.157	37.0067	LRP1	Lateral root primordium (LRP) protein-related
Cluster 8	TCP	FvH4_3g08160	2.18101	7.76786	10.0563	MEE35,TCP4	TCP family transcription factor 4
Cluster 8	WRKY	FvH4_6g02660	1.48248	3.42797	3.66923	ATWRKY74,WRKY74	WRKY DNA-binding protein 74
Cluster 8	WRKY	FvH4_6g38370	0.145891	1.44848	2.8363	ATWRKY28,WRKY28	WRKY DNA-binding protein 28
Cluster 8	bHLH	FvH4_7g17790	17.7302	41.8968	44.9647		basic helix-loop-helix (bHLH) DNA-binding superfamily protein
Cluster 8	zf-HD	FvH4_4g31350	72.7039	103.706	147.339	ATHB29,ZFHD1	zinc finger homeodomain 1
Cluster 9	AP2/ERF-ERF	FvH4_7g09550	6.57719	3.81979	12.0142		Integrase-type DNA-binding superfamily protein
Cluster 9	B3	FvH4_7g23440	9.29993	3.87784	23.1545		transcriptional factor B3 family protein
Cluster 9	HB-HD-ZIP	FvH4_1g20230	181.311	97.8373	247.642	ATHB6,HB6	homeobox protein 6
Cluster 9	LOB	FvH4_7g24810	4.75399	1.51737	6.09194	LBD21	LOB domain-containing protein 21
Cluster 9	MADS-MIKC	FvH4_7g01720	37.4835	4.02763	70.7724	AGL15	AGAMOUS-like 15
Cluster 9	NAC	FvH4_5g21670	2.2488	1.3121	3.73393	anac071,NAC071	NAC domain containing protein 71
Cluster 9	NF-YA	FvH4_1g08160	82.6605	34.7967	166.149	ATHAP2C,HAP2C,NF-YA3	nuclear factor Y, subunit A3
Cluster 9	NF-YA	FvH4_3g28780	26.6524	14.1477	48.1293	NF-YA9	nuclear factor Y, subunit A9
Cluster 9	NF-YA	FvH4_6g20510	5.40596	1.34498	6.2883	ATHAP2B,HAP2B,NF-YA2,UNE8	nuclear factor Y, subunit A2
Cluster 9	NF-YA	FvH4_7g01120	6.67528	2.4292	15.7797	ATHAP2A,EMB2220,HAP2A,NF-YA1	nuclear factor Y, subunit A1
Cluster 9	WRKY	FvH4_4g20230	2.80941	1.68856	5.41422	ATWRKY48,WRKY48	WRKY DNA-binding protein 48
Cluster 9	bHLH	FvH4_1g16130	0	0.0795786	2.78864	HEC2	basic helix-loop-helix (bHLH) DNA-binding superfamily protein
Cluster 9	bHLH	FvH4_5g13341	15.9888	10.0934	26.6189	BIM1	basic helix-loop-helix (bHLH) DNA-binding superfamily protein
Cluster 9	bHLH	FvH4_6g02900	29.4777	14.7945	35.0539	UNE12	basic helix-loop-helix (bHLH) DNA-binding superfamily protein
Cluster 9	zf-HD	FvH4_5g27650	4.91327	1.74208	8.47488	AtHB31,HB31	homeobox protein 31

## Sheet: Enriched GO terms
Enriched GO terms in the nine k-means clusters if any
Cluster	Tags	GO ID	GO Name	GO Category	FDR	P-Value	Nr Test	Nr Reference	Non Annot Test	Non Annot Reference
Cluster 2	[OVER]	GO:0050794	regulation of cellular process	BIOLOGICAL_PROCESS	7.0644e-05	3.33541e-08	59	1590	507	31851
Cluster 2	[OVER]	GO:0050789	regulation of biological process	BIOLOGICAL_PROCESS	7.0644e-05	3.29544e-08	61	1670	505	31771
Cluster 2	[OVER]	GO:0023052	signaling	BIOLOGICAL_PROCESS	0.000104654	7.41178e-08	24	373	542	33068
Cluster 2	[OVER]	GO:0065007	biological regulation	BIOLOGICAL_PROCESS	0.000181571	2.32054e-07	61	1770	505	31671
Cluster 2	[OVER]	GO:0007154	cell communication	BIOLOGICAL_PROCESS	0.000181571	1.98739e-07	27	487	539	32954
Cluster 2	[OVER]	GO:0007165	signal transduction	BIOLOGICAL_PROCESS	0.000181571	2.57183e-07	23	371	543	33070
Cluster 2	[OVER]	GO:0050896	response to stimulus	BIOLOGICAL_PROCESS	0.000911048	1.72058e-06	41	1060	525	32381
Cluster 2	[OVER]	GO:0051716	cellular response to stimulus	BIOLOGICAL_PROCESS	0.00131364	2.79101e-06	27	563	539	32878
Cluster 2	[OVER]	GO:0008152	metabolic process	BIOLOGICAL_PROCESS	0.031262	8.11808e-05	175	7967	391	25474
Cluster 2	[OVER]	GO:2000112	regulation of cellular macromolecule biosynthetic process	BIOLOGICAL_PROCESS	0.0469473	0.000422696	33	1017	533	32424
Cluster 2	[OVER]	GO:0051252	regulation of RNA metabolic process	BIOLOGICAL_PROCESS	0.0469473	0.000363899	33	1008	533	32433
Cluster 2	[OVER]	GO:0051171	regulation of nitrogen compound metabolic process	BIOLOGICAL_PROCESS	0.0469473	0.000223479	35	1064	531	32377
Cluster 2	[OVER]	GO:0034637	cellular carbohydrate biosynthetic process	BIOLOGICAL_PROCESS	0.0469473	0.000409403	7	74	559	33367
Cluster 2	[OVER]	GO:0060255	regulation of macromolecule metabolic process	BIOLOGICAL_PROCESS	0.0469473	0.000422849	35	1103	531	32338
Cluster 2	[OVER]	GO:0009889	regulation of biosynthetic process	BIOLOGICAL_PROCESS	0.0469473	0.000436854	33	1019	533	32422
Cluster 2	[OVER]	GO:0031326	regulation of cellular biosynthetic process	BIOLOGICAL_PROCESS	0.0469473	0.000436854	33	1019	533	32422
Cluster 2	[OVER]	GO:0031323	regulation of cellular metabolic process	BIOLOGICAL_PROCESS	0.0469473	0.000223479	35	1064	531	32377
Cluster 2	[OVER]	GO:1903506	regulation of nucleic acid-templated transcription	BIOLOGICAL_PROCESS	0.0469473	0.00033448	33	1003	533	32438
Cluster 2	[OVER]	GO:0010556	regulation of macromolecule biosynthetic process	BIOLOGICAL_PROCESS	0.0469473	0.000422696	33	1017	533	32424
Cluster 2	[OVER]	GO:0006355	regulation of transcription, DNA-templated	BIOLOGICAL_PROCESS	0.0469473	0.00033448	33	1003	533	32438
Cluster 2	[OVER]	GO:0019219	regulation of nucleobase-containing compound metabolic process	BIOLOGICAL_PROCESS	0.0469473	0.000436854	33	1019	533	32422
Cluster 2	[OVER]	GO:0019222	regulation of metabolic process	BIOLOGICAL_PROCESS	0.0469473	0.000443317	35	1106	531	32335
Cluster 2	[OVER]	GO:0080090	regulation of primary metabolic process	BIOLOGICAL_PROCESS	0.0469473	0.000231156	35	1066	531	32375
Cluster 2	[OVER]	GO:2001141	regulation of RNA biosynthetic process	BIOLOGICAL_PROCESS	0.0469473	0.00033448	33	1003	533	32438
Cluster 2	[OVER]	GO:0043531	ADP binding	MOLECULAR_FUNCTION	0.000237287	3.92117e-07	21	322	545	33119
Cluster 2	[OVER]	GO:0035251	UDP-glucosyltransferase activity	MOLECULAR_FUNCTION	0.0232971	5.4998e-05	7	52	559	33389
Cluster 2	[OVER]	GO:0032559	adenyl ribonucleotide binding	MOLECULAR_FUNCTION	0.0375822	0.000111331	64	2318	502	31123
Cluster 2	[OVER]	GO:0030554	adenyl nucleotide binding	MOLECULAR_FUNCTION	0.0375822	0.000115337	64	2321	502	31120
Cluster 2	[OVER]	GO:0097159	organic cyclic compound binding	MOLECULAR_FUNCTION	0.0469473	0.000286812	139	6218	427	27223
Cluster 2	[OVER]	GO:0017076	purine nucleotide binding	MOLECULAR_FUNCTION	0.0469473	0.000248561	67	2532	499	30909
Cluster 2	[OVER]	GO:0097367	carbohydrate derivative binding	MOLECULAR_FUNCTION	0.0469473	0.000233071	68	2574	498	30867
Cluster 2	[OVER]	GO:0043167	ion binding	MOLECULAR_FUNCTION	0.0469473	0.000422897	110	4748	456	28693
Cluster 2	[OVER]	GO:0043168	anion binding	MOLECULAR_FUNCTION	0.0469473	0.000309813	73	2844	493	30597
Cluster 2	[OVER]	GO:0032553	ribonucleotide binding	MOLECULAR_FUNCTION	0.0469473	0.000310335	67	2553	499	30888
Cluster 2	[OVER]	GO:0032555	purine ribonucleotide binding	MOLECULAR_FUNCTION	0.0469473	0.000228134	67	2524	499	30917
Cluster 2	[OVER]	GO:0140110	transcription regulator activity	MOLECULAR_FUNCTION	0.0469473	0.00019395	19	425	547	33016
Cluster 2	[OVER]	GO:0003700	DNA-binding transcription factor activity	MOLECULAR_FUNCTION	0.0469473	0.000376895	17	377	549	33064
Cluster 2	[OVER]	GO:1901363	heterocyclic compound binding	MOLECULAR_FUNCTION	0.0469473	0.000286812	139	6218	427	27223
Cluster 2	[OVER]	GO:0046983	protein dimerization activity	MOLECULAR_FUNCTION	0.0469473	0.000345123	19	446	547	32995
Cluster 2	[OVER]	GO:0003824	catalytic activity	MOLECULAR_FUNCTION	0.0469473	0.000236138	164	7531	402	25910
Cluster 4	[OVER]	GO:0004185	serine-type carboxypeptidase activity	MOLECULAR_FUNCTION	0.000475002	1.38362e-07	6	19	327	33186
Cluster 4	[OVER]	GO:0070008	serine-type exopeptidase activity	MOLECULAR_FUNCTION	0.000475002	1.78371e-07	6	20	327	33185
Cluster 4	[OVER]	GO:0004180	carboxypeptidase activity	MOLECULAR_FUNCTION	0.000971226	5.47067e-07	6	25	327	33180
Cluster 4	[OVER]	GO:0008238	exopeptidase activity	MOLECULAR_FUNCTION	0.0081756	6.14015e-06	6	40	327	33165
Cluster 5	[OVER]	GO:0007165	signal transduction	BIOLOGICAL_PROCESS	1.67e-06	1.03e-09	22	372	361	33252
Cluster 5	[OVER]	GO:0023052	signaling	BIOLOGICAL_PROCESS	1.67e-06	1.18e-09	22	375	361	33249
Cluster 5	[OVER]	GO:0007154	cell communication	BIOLOGICAL_PROCESS	6.42e-06	6.06e-09	24	490	359	33134
Cluster 5	[OVER]	GO:0051716	cellular response to stimulus	BIOLOGICAL_PROCESS	6.93e-05	8.18e-08	24	566	359	33058
Cluster 5	[OVER]	GO:0050794	regulation of cellular process	BIOLOGICAL_PROCESS	0.000393	8.19e-07	42	1607	341	32017
Cluster 5	[OVER]	GO:0065007	biological regulation	BIOLOGICAL_PROCESS	0.000393	8.49e-07	45	1786	338	31838
Cluster 5	[OVER]	GO:0050789	regulation of biological process	BIOLOGICAL_PROCESS	0.00107723	2.8e-06	42	1689	341	31935
Cluster 5	[OVER]	GO:0050896	response to stimulus	BIOLOGICAL_PROCESS	0.00120371	3.41e-06	31	1070	352	32554
Cluster 5	[OVER]	GO:0048046	apoplast	CELLULAR_COMPONENT	0.0229882	0.00011	6	61	377	33563
Cluster 5	[OVER]	GO:0043531	ADP binding	MOLECULAR_FUNCTION	4.75e-08	1.12e-11	23	320	360	33304
Cluster 5	[OVER]	GO:0004185	serine-type carboxypeptidase activity	MOLECULAR_FUNCTION	0.000349	4.95e-07	7	36	376	33588
Cluster 5	[OVER]	GO:0004180	carboxypeptidase activity	MOLECULAR_FUNCTION	0.000393	6.83e-07	7	38	376	33586
Cluster 5	[OVER]	GO:0070008	serine-type exopeptidase activity	MOLECULAR_FUNCTION	0.000393	9.29e-07	7	40	376	33584
Cluster 5	[OVER]	GO:0032559	adenyl ribonucleotide binding	MOLECULAR_FUNCTION	0.00522653	1.67e-05	50	2332	333	31292
Cluster 5	[OVER]	GO:0030554	adenyl nucleotide binding	MOLECULAR_FUNCTION	0.00522653	1.73e-05	50	2335	333	31289
Cluster 5	[OVER]	GO:0008238	exopeptidase activity	MOLECULAR_FUNCTION	0.00963428	3.41e-05	7	73	376	33551
Cluster 5	[OVER]	GO:0032555	purine ribonucleotide binding	MOLECULAR_FUNCTION	0.00977874	3.69e-05	52	2539	331	31085
Cluster 5	[OVER]	GO:0017076	purine nucleotide binding	MOLECULAR_FUNCTION	0.00997449	4e-05	52	2547	331	31077
Cluster 5	[OVER]	GO:0032553	ribonucleotide binding	MOLECULAR_FUNCTION	0.011607	4.93e-05	52	2568	331	31056
Cluster 5	[OVER]	GO:0097367	carbohydrate derivative binding	MOLECULAR_FUNCTION	0.0136328	6.11e-05	52	2590	331	31034
Cluster 5	[OVER]	GO:0043168	anion binding	MOLECULAR_FUNCTION	0.0229882	0.000114	55	2862	328	30762
Cluster 5	[OVER]	GO:1901265	nucleoside phosphate binding	MOLECULAR_FUNCTION	0.026908	0.000152	54	2826	329	30798
Cluster 5	[OVER]	GO:0004553	hydrolase activity, hydrolyzing O-glycosyl compounds	MOLECULAR_FUNCTION	0.026908	0.000145	14	373	369	33251
Cluster 5	[OVER]	GO:0000166	nucleotide binding	MOLECULAR_FUNCTION	0.026908	0.000152	54	2826	329	30798
Cluster 5	[OVER]	GO:0016798	hydrolase activity, acting on glycosyl bonds	MOLECULAR_FUNCTION	0.0373146	0.00022	14	389	369	33235
Cluster 5	[OVER]	GO:0036094	small molecule binding	MOLECULAR_FUNCTION	0.0422317	0.000269	55	2963	328	30661
Cluster 5	[OVER]	GO:0043167	ion binding	MOLECULAR_FUNCTION	0.0422317	0.000264	80	4778	303	28846
Cluster 6	[OVER]	GO:0015979	photosynthesis	BIOLOGICAL_PROCESS	3.04628e-05	7.19141e-09	10	64	356	33577
Cluster 6	[OVER]	GO:0009058	biosynthetic process	BIOLOGICAL_PROCESS	0.000156859	2.00589e-07	57	2532	309	31109
Cluster 6	[OVER]	GO:0051254	positive regulation of RNA metabolic process	BIOLOGICAL_PROCESS	0.000185252	5.5611e-07	8	58	358	33583
Cluster 6	[OVER]	GO:0031328	positive regulation of cellular biosynthetic process	BIOLOGICAL_PROCESS	0.000185252	7.87189e-07	8	61	358	33580
Cluster 6	[OVER]	GO:1903508	positive regulation of nucleic acid-templated transcription	BIOLOGICAL_PROCESS	0.000185252	5.5611e-07	8	58	358	33583
Cluster 6	[OVER]	GO:0010628	positive regulation of gene expression	BIOLOGICAL_PROCESS	0.000185252	7.87189e-07	8	61	358	33580
Cluster 6	[OVER]	GO:0010557	positive regulation of macromolecule biosynthetic process	BIOLOGICAL_PROCESS	0.000185252	7.87189e-07	8	61	358	33580
Cluster 6	[OVER]	GO:0045935	positive regulation of nucleobase-containing compound metabolic process	BIOLOGICAL_PROCESS	0.000185252	6.25637e-07	8	59	358	33582
Cluster 6	[OVER]	GO:0045893	positive regulation of transcription, DNA-templated	BIOLOGICAL_PROCESS	0.000185252	5.5611e-07	8	58	358	33583
Cluster 6	[OVER]	GO:0009891	positive regulation of biosynthetic process	BIOLOGICAL_PROCESS	0.000185252	7.87189e-07	8	61	358	33580
Cluster 6	[OVER]	GO:1902680	positive regulation of RNA biosynthetic process	BIOLOGICAL_PROCESS	0.000185252	5.5611e-07	8	58	358	33583
Cluster 6	[OVER]	GO:1901576	organic substance biosynthetic process	BIOLOGICAL_PROCESS	0.000192784	8.64707e-07	54	2453	312	31188
Cluster 6	[OVER]	GO:0044249	cellular biosynthetic process	BIOLOGICAL_PROCESS	0.000464018	2.629e-06	52	2414	314	31227
Cluster 6	[OVER]	GO:0045944	positive regulation of transcription by RNA polymerase II	BIOLOGICAL_PROCESS	0.000502075	2.96314e-06	7	51	359	33590
Cluster 6	[OVER]	GO:0051173	positive regulation of nitrogen compound metabolic process	BIOLOGICAL_PROCESS	0.00087692	5.99826e-06	8	82	358	33559
Cluster 6	[OVER]	GO:0048518	positive regulation of biological process	BIOLOGICAL_PROCESS	0.00087692	6.00346e-06	9	110	357	33531
Cluster 6	[OVER]	GO:0010604	positive regulation of macromolecule metabolic process	BIOLOGICAL_PROCESS	0.00087692	5.99826e-06	8	82	358	33559
Cluster 6	[OVER]	GO:0044271	cellular nitrogen compound biosynthetic process	BIOLOGICAL_PROCESS	0.00087692	5.64724e-06	43	1888	323	31753
Cluster 6	[OVER]	GO:0031325	positive regulation of cellular metabolic process	BIOLOGICAL_PROCESS	0.000935843	7.06963e-06	8	84	358	33557
Cluster 6	[OVER]	GO:0009893	positive regulation of metabolic process	BIOLOGICAL_PROCESS	0.000935843	7.06963e-06	8	84	358	33557
Cluster 6	[OVER]	GO:0048522	positive regulation of cellular process	BIOLOGICAL_PROCESS	0.00316138	2.46283e-05	8	101	358	33540
Cluster 6	[OVER]	GO:0008152	metabolic process	BIOLOGICAL_PROCESS	0.00534093	4.53904e-05	121	8021	245	25620
Cluster 6	[OVER]	GO:1901362	organic cyclic compound biosynthetic process	BIOLOGICAL_PROCESS	0.00685925	5.99132e-05	33	1433	333	32208
Cluster 6	[OVER]	GO:0019438	aromatic compound biosynthetic process	BIOLOGICAL_PROCESS	0.018111	0.000179571	31	1392	335	32249
Cluster 6	[OVER]	GO:0018130	heterocycle biosynthetic process	BIOLOGICAL_PROCESS	0.0212213	0.00021542	31	1407	335	32234
Cluster 6	[OVER]	GO:0034645	cellular macromolecule biosynthetic process	BIOLOGICAL_PROCESS	0.0231427	0.000248772	38	1887	328	31754
Cluster 6	[OVER]	GO:0006357	regulation of transcription by RNA polymerase II	BIOLOGICAL_PROCESS	0.0231427	0.000242447	7	107	359	33534
Cluster 6	[OVER]	GO:0009059	macromolecule biosynthetic process	BIOLOGICAL_PROCESS	0.0231427	0.000251313	38	1888	328	31753
Cluster 6	[OVER]	GO:0034654	nucleobase-containing compound biosynthetic process	BIOLOGICAL_PROCESS	0.0274943	0.000311551	29	1308	337	32333
Cluster 6	[OVER]	GO:0010468	regulation of gene expression	BIOLOGICAL_PROCESS	0.0295239	0.000341518	25	1061	341	32580
Cluster 6	[OVER]	GO:0010467	gene expression	BIOLOGICAL_PROCESS	0.0326975	0.000391263	39	2002	327	31639
Cluster 6	[OVER]	GO:1903506	regulation of nucleic acid-templated transcription	BIOLOGICAL_PROCESS	0.0326975	0.000409105	24	1012	342	32629
Cluster 6	[OVER]	GO:0006355	regulation of transcription, DNA-templated	BIOLOGICAL_PROCESS	0.0326975	0.000409105	24	1012	342	32629
Cluster 6	[OVER]	GO:2001141	regulation of RNA biosynthetic process	BIOLOGICAL_PROCESS	0.0326975	0.000409105	24	1012	342	32629
Cluster 6	[OVER]	GO:0051252	regulation of RNA metabolic process	BIOLOGICAL_PROCESS	0.0343553	0.000437958	24	1017	342	32624
Cluster 6	[OVER]	GO:2000112	regulation of cellular macromolecule biosynthetic process	BIOLOGICAL_PROCESS	0.0346939	0.000494416	24	1026	342	32615
Cluster 6	[OVER]	GO:0009889	regulation of biosynthetic process	BIOLOGICAL_PROCESS	0.0346939	0.000507796	24	1028	342	32613
Cluster 6	[OVER]	GO:0031326	regulation of cellular biosynthetic process	BIOLOGICAL_PROCESS	0.0346939	0.000507796	24	1028	342	32613
Cluster 6	[OVER]	GO:0032774	RNA biosynthetic process	BIOLOGICAL_PROCESS	0.0346939	0.00050338	26	1154	340	32487
Cluster 6	[OVER]	GO:0010556	regulation of macromolecule biosynthetic process	BIOLOGICAL_PROCESS	0.0346939	0.000494416	24	1026	342	32615
Cluster 6	[OVER]	GO:0006351	transcription, DNA-templated	BIOLOGICAL_PROCESS	0.0346939	0.000490913	26	1152	340	32489
Cluster 6	[OVER]	GO:0097659	nucleic acid-templated transcription	BIOLOGICAL_PROCESS	0.0346939	0.000490913	26	1152	340	32489
Cluster 6	[OVER]	GO:0019219	regulation of nucleobase-containing compound metabolic process	BIOLOGICAL_PROCESS	0.0346939	0.000507796	24	1028	342	32613
Cluster 6	[OVER]	GO:0060255	regulation of macromolecule metabolic process	BIOLOGICAL_PROCESS	0.0451154	0.00067098	25	1113	341	32528
Cluster 6	[OVER]	GO:0019222	regulation of metabolic process	BIOLOGICAL_PROCESS	0.0453888	0.000696476	25	1116	341	32525
Cluster 6	[OVER]	GO:0009521	photosystem	CELLULAR_COMPONENT	0.000142329	1.008e-07	7	29	359	33612
Cluster 6	[OVER]	GO:0034357	photosynthetic membrane	CELLULAR_COMPONENT	0.000156859	2.1695e-07	7	33	359	33608
Cluster 6	[OVER]	GO:0009579	thylakoid	CELLULAR_COMPONENT	0.000185252	6.86016e-07	7	40	359	33601
Cluster 6	[OVER]	GO:0044436	thylakoid part	CELLULAR_COMPONENT	0.000185252	3.64729e-07	7	36	359	33605
Cluster 6	[OVER]	GO:0009523	photosystem II	CELLULAR_COMPONENT	0.000882942	6.25313e-06	5	20	361	33621
Cluster 6	[OVER]	GO:0019898	extrinsic component of membrane	CELLULAR_COMPONENT	0.00534093	4.50174e-05	4	15	362	33626
Cluster 6	[OVER]	GO:0009654	photosystem II oxygen evolving complex	CELLULAR_COMPONENT	0.00761804	6.83393e-05	4	17	362	33624
Cluster 6	[OVER]	GO:0016020	membrane	CELLULAR_COMPONENT	0.0144246	0.000136944	38	1830	328	31811
Cluster 6	[OVER]	GO:0042651	thylakoid membrane	CELLULAR_COMPONENT	0.0144246	0.000139615	4	21	362	33620
Cluster 6	[OVER]	GO:0043565	sequence-specific DNA binding	MOLECULAR_FUNCTION	8.02676e-05	3.78978e-08	15	216	351	33425
Cluster 6	[OVER]	GO:0001012	RNA polymerase II regulatory region DNA binding	MOLECULAR_FUNCTION	0.000156859	2.59209e-07	7	34	359	33607
Cluster 6	[OVER]	GO:0000977	RNA polymerase II regulatory region sequence-specific DNA binding	MOLECULAR_FUNCTION	0.000156859	2.59209e-07	7	34	359	33607
Cluster 6	[OVER]	GO:0001067	regulatory region nucleic acid binding	MOLECULAR_FUNCTION	0.000348685	1.81092e-06	7	47	359	33594
Cluster 6	[OVER]	GO:0000976	transcription regulatory region sequence-specific DNA binding	MOLECULAR_FUNCTION	0.000348685	1.81092e-06	7	47	359	33594
Cluster 6	[OVER]	GO:0044212	transcription regulatory region DNA binding	MOLECULAR_FUNCTION	0.000348685	1.81092e-06	7	47	359	33594
Cluster 6	[OVER]	GO:1990837	sequence-specific double-stranded DNA binding	MOLECULAR_FUNCTION	0.000428774	2.32809e-06	7	49	359	33592
Cluster 6	[OVER]	GO:0003700	DNA-binding transcription factor activity	MOLECULAR_FUNCTION	0.00356444	2.86098e-05	15	379	351	33262
Cluster 6	[OVER]	GO:0140110	transcription regulator activity	MOLECULAR_FUNCTION	0.0118755	0.000109335	15	429	351	33212
Cluster 6	[OVER]	GO:0003690	double-stranded DNA binding	MOLECULAR_FUNCTION	0.0269928	0.000299495	7	111	359	33530
Cluster 6	[OVER]	GO:0003677	DNA binding	MOLECULAR_FUNCTION	0.0453888	0.000687464	31	1510	335	32131
Cluster 7	[OVER]	GO:0009814	defense response, incompatible interaction	BIOLOGICAL_PROCESS	0.0278741	2.63212e-05	4	11	409	33583
Cluster 7	[OVER]	GO:0009627	systemic acquired resistance	BIOLOGICAL_PROCESS	0.0278741	2.63212e-05	4	11	409	33583
Cluster 7	[OVER]	GO:0055085	transmembrane transport	BIOLOGICAL_PROCESS	0.0392426	4.63203e-05	25	819	388	32775
Cluster 7	[OVER]	GO:0002376	immune system process	BIOLOGICAL_PROCESS	0.0419073	8.90381e-05	4	16	409	33578
Cluster 7	[OVER]	GO:0045087	innate immune response	BIOLOGICAL_PROCESS	0.0419073	8.90381e-05	4	16	409	33578
Cluster 7	[OVER]	GO:0006955	immune response	BIOLOGICAL_PROCESS	0.0419073	8.90381e-05	4	16	409	33578
Cluster 7	[OVER]	GO:0031224	intrinsic component of membrane	CELLULAR_COMPONENT	0.0186297	4.39795e-06	28	852	385	32742
Cluster 7	[OVER]	GO:0016021	integral component of membrane	CELLULAR_COMPONENT	0.0187103	8.83394e-06	27	836	386	32758
Cluster 7	[OVER]	GO:0044425	membrane part	CELLULAR_COMPONENT	0.0419073	6.61921e-05	29	1050	384	32544
Cluster 9	[OVER]	GO:0016602	CCAAT-binding factor complex	CELLULAR_COMPONENT	0.00438127	1.0343e-06	3	2	158	33844
Cluster 9	[OVER]	GO:0031224	intrinsic component of membrane	CELLULAR_COMPONENT	0.0437355	2.06494e-05	15	865	146	32981
