# Supplementary material for: Gene Expression Profiling of the Shoot Meristematic Tissues in Woodland Strawberry Fragaria vesca
Source: Front Plant Sci. 2019 Dec 13;10:1624. doi: 10.3389/fpls.2019.01624 (PMC6923813; doi:10.3389/fpls.2019.01624)
Supplement: Supplementary file 4 [file DataSheet_4.xlsx]

## Sheet: Known genes
Supplementary Data 4. Homologs of key genes regulating SAM leaf FM development and the MADS-box genes
SHEET 1: Homologs of key genes regulating SAM leaf FM development
SHEET 2: The MADS-box genes
Homologs of key genes regulating flowering time and the development of SAM, leaf, and FM
Gene ID (v2.0.a2)	Gene ID (v4.0.a2)	Symbol	Full Name	SAM	FM	REM	Function
gene19424	FvH4_7g12700	FvSOC1	SUPPRESSOR OF OVEREXPRESSION OF CO 1	129.175	29.751	9.93968	Flowering time
gene30276	FvH4_6g18480	FvTFL	TERMINAL FLOWER	60.9265	0	5.5473	Flowering time
gene21992	FvH4_3g24700	FvATC	ARABIDOPSIS THALIANA CENTRORADIALIS	54.1525	0	0	Flowering time
gene21535	FvH4_6g00090	FvFT1	FLOWERING LOCUS T 1	0	0.285841	0.119771	Flowering time
gene04680	FvH4_4g30710	FvFT2	FLOWERING LOCUS T 2	0.051648	2.38456	5.87299	Flowering time
gene09405	FvH4_5g17130	FvMFT	MOTHER OF FT AND TFL1	0.362786	0.171982	0.0691509	Flowering time
gene13304	FvH4_7g29150	FvBFT	BROTHER OF FT AND TFL1	3.6434	2.80449	0.468833	Flowering time
gene20808	FvH4_1g19710	FvSVP	SHORT VEGETATIVE PHASE	141.868	142.809	8.87967	Flowering time
gene04172	FvH4_6g45860	FvCOL2	CONSTANS-LIKE 2	33.9732	52.0748	42.6866	Flowering time
gene01679	FvH4_2g10660	FvRBL	REBELOTE	18.3573	11.6443	22.1189	Flowering time
gene07187	FvH4_4g23650	FvSPL15	SQUAMOSA PROMOTER BINDING PROTEIN-LIKE 15	25.8984	26.9669	22.0591	Flowering time
gene22660	FvH4_6g22640	FvSPL9	SQUAMOSA PROMOTER BINDING PROTEIN-LIKE 9	89.1407	141.705	71.0255	Flowering time
gene23463	FvH4_7g18750	FvFLD	FLOWERING LOCUS D	9.16776	9.17058	12.5745	Flowering time
gene36841	FvH4_4g27750	FvPAN	PERIANTHIA	73.9348	81.4839	100.616	Flowering time
gene14556	FvH4_1g11270	FvFD	FD	143.149	84.9113	26.097	Flowering time
gene05560	FvH4_1g18930	FvNFLa	NO FLOWERING IN SHORT DAYa	116.851	94.7027	230.112	Flowering time
gene26895	FvH4_5g33810	FvNFLb	NO FLOWERING IN SHORT DAYb	45.3351	6.71813	10.4998	Flowering time
gene03871	FvH4_4g28030	FvTEM1	TEMPRANILLO 1	46.4238	58.2441	90.6128	Flowering time
gene26022	FvH4_5g14830	FvCDF1	CELL GROWTH DEFECT FACTOR 1	0.315821	0.389054	0.730778	Flowering time
gene30464	FvH4_3g04400	FvWUS1	WUSCHEL 1	0.283377	9.14845	56.7421	SAM and leaf development
gene14621	FvH4_1g11910	FvWUS2	WUSCHEL 2	9.85385	14.4756	1.76838	SAM and leaf development
gene31749	FvH4_5g00020	FvLOM3/HAM3	LOST MERISTEMS 3/HAIRY MERISTEM 3	67.4021	55.8711	86.9128	SAM and leaf development
gene14133	FvH4_3g35730	FvWOX4	WUSCHEL RELATED HOMEOBOX 4	0.152207	2.32868	14.5961	SAM and leaf development
gene33406	FvH4_5g09660	FvLFYa	LEAFYa	47.4102	341.729	58.0983	SAM and leaf development
gene30683	FvH4_3g04170	FvLFYb	LEAFYb	3.64305	9.68938	14.2375	SAM and leaf development
gene30750	FvH4_3g03530	FvLFYd	LEAFYd	0.830994	17.4307	143.496	SAM and leaf development
gene28935	FvH4_3g10130	FvWOX9	WUSCHEL RELATED HOMEOBOX 9	2.22226	19.0055	29.5948	SAM and leaf development
gene08548	FvH4_2g38230	FvCLV1	CLAVATA 1	19.9114	45.0794	81.8339	SAM and leaf development
gene05608	FvH4_1g18710	FvBAM1	BARELY ANY MERISTEM 1	144.824	177.037	195.05	SAM and leaf development
gene19913	FvH4_3g13410	FvBAM2	BARELY ANY MERISTEM 2	11.961	7.80966	9.28408	SAM and leaf development
gene29591	FvH4_5g28640	FvBAM3	BARELY ANY MERISTEM 3	10.6484	10.8694	7.41367	SAM and leaf development
gene16790	FvH4_6g00680	FvCLV2	CLAVATA 2	17.9319	15.593	19.0095	SAM and leaf development
gene03890	FvH4_4g28250	FvFEA3	FASCIATED EAR3	11.2541	166.431	35.6933	SAM and leaf development
gene03956	FvH4_7g11120	FvLOM1/HAM1	LOST MERISTEMS 1/HAIRY MERISTEM 1	76.2885	72.6879	101.864	SAM and leaf development
gene29558	FvH4_1g13740	FvLOM4/HAM4	LOST MERISTEMS 4/HAIRY MERISTEM 4	0.974004	0.771548	1.10128	SAM and leaf development
gene19967	FvH4_3g12960	FvUFO1	UNUSUAL FLORAL ORGANS 1	9.51767	159.32	54.3901	SAM and leaf development
gene30704	FvH4_3g03990	FvUFO2	UNUSUAL FLORAL ORGANS 2	0.0915139	20.5201	34.4413	SAM and leaf development
gene31529	FvH4_6g06880	FvUFO3	UNUSUAL FLORAL ORGANS 3	0.0955972	107.532	264.345	SAM and leaf development
gene09588	FvH4_6g16343	FvCLV3	CLAVATA 3	22.6105	63.8449	62.3773	SAM and leaf development
gene07286	FvH4_4g22780	FvCRN	CORYNE	30.9877	31.0008	26.6384	SAM and leaf development
gene26119	FvH4_5g13500	FvFUL	FRUITFULL	10.7917	65.9836	52.6346	SAM and leaf development
gene28942	FvH4_3g32190	FvPHV	PHAVOLUTA	58.0343	35.1865	76.2758	SAM and leaf development
gene30949	FvH4_1g04170	FvLUGa	LEUNIGa	56.0664	47.1976	85.1819	SAM and leaf development
gene17514	FvH4_2g19160	FvLUGb	LEUNIGb	31.3802	26.9198	41.8023	SAM and leaf development
gene11729	FvH4_2g29940	FvLUGc	LEUNIGc	91.8737	65.2686	111.035	SAM and leaf development
gene29912	FvH4_4g00520	FvLUGd	LEUNIGd	15.643	6.49559	10.8724	SAM and leaf development
gene02373	FvH4_3g08980	FvLUGe	LEUNIGe	0.11176	0.0222804	0.0804877	SAM and leaf development
gene00925	FvH4_2g14890	FvSEU	SEUSS	50.8978	42.3692	67.0322	SAM and leaf development
gene21882	FvH4_6g25330	FvFEA4a	FASCIATED EAR4a	43.3971	37.2963	42.4992	SAM and leaf development
gene14220	FvH4_7g03530	FvFEA4b	FASCIATED EAR4b	31.6115	31.4507	35.256	SAM and leaf development
gene27287	FvH4_3g18140	FvFUWA	FASCIATED EAR4c	22.9996	20.5999	30.1336	SAM and leaf development
gene02647	FvH4_2g32400	FvKNAT1/BP	KNAT1/BREVIPEDICELLUS	78.4313	48.8783	40.6578	SAM and leaf development
gene19507	FvH4_3g01400	FvSTM	SHOOT MERISTEMLESS	217.536	126.458	217.2	SAM and leaf development
gene28930	FvH4_4g01630	FvZLL/AGO10	ZWILLE/ ARGONAUTE 10	84.4267	68.443	141.753	SAM and leaf development
gene09291	FvH4_5g18150	FvAGO1a	ARGONAUTE 1a	66.3208	56.8936	119.149	SAM and leaf development
gene09290	FvH4_5g18151	FvAGO1b	ARGONAUTE 1b	202.566	162.482	295.762	SAM and leaf development
gene14489	FvH4_3g30201	FvAGO1c	ARGONAUTE 1c	0.648845	0.228623	0.503875	SAM and leaf development
gene14490	FvH4_3g30202	FvAGO1d	ARGONAUTE 1d	52.7716	47.9559	116.407	SAM and leaf development
gene11476	FvH4_4g03750	FvTAW1-1	TAWAWA1-1	54.236	11.086	16.0113	SAM and leaf development
gene08106	FvH4_2g21310	FvTAW1-2	TAWAWA1-2	327.026	40.9766	1.88098	SAM and leaf development
gene28212	FvH4_3g39410	FvTAW1-3	TAWAWA1-3	52.9217	105.428	92.5045	SAM and leaf development
gene20154	FvH4_3g11120	FvTAW1-4	TAWAWA1-4	933.123	194.689	100.38	SAM and leaf development
gene01184	FvH4_3g41310	FvLAS	LATERAL SUPPRESSOR	5.09117	9.06984	24.161	SAM and leaf development
gene31797	FvH4_5g05970	FvLOB	LATERAL ORGAN BOUNDARIES	20.3459	21.7232	16.1969	SAM and leaf development
gene05581	FvH4_1g18500	FvRAX3	REGULATOR OF AXILLARY MERISTEMS3	0.315008	0.193956	0.0504266	SAM and leaf development
gene04728	FvH4_4g31190	FvLOF1	LATERAL ORGAN FUSION 1	30.9354	30.9283	15.3884	SAM and leaf development
gene00971	FvH4_3g19410	FvCUC2a	CUP-SHAPED COTYLEDON 2a	51.5036	76.7067	61.9399	SAM and leaf development
gene22522	FvH4_6g06070	FvCUC2b	CUP-SHAPED COTYLEDON 2b	18.301	81.6506	83.3757	SAM and leaf development
gene30749	FvH4_3g03540	FvCUC2c	CUP-SHAPED COTYLEDON 2c	0.0166104	4.98626	38.1556	SAM and leaf development
gene31474	FvH4_5g25960	FvCUC3	CUP-SHAPED COTYLEDON 3	29.3229	58.5192	138.641	SAM and leaf development
gene15491	FvH4_2g30910	FvER	ERECTA	330.174	359.711	329.444	SAM and leaf development
gene13404	FvH4_7g28290	FvERL2	ERECTA-LIKE 2	74.68	143.388	232.612	SAM and leaf development
gene18421	FvH4_6g13640	FvAS1a	ASYMMETRIC LEAVES 1a	53.4722	103.236	85.7239	SAM and leaf development
gene08535	FvH4_2g38350	FvAS1b	ASYMMETRIC LEAVES 1b	67.186	68.0888	88.98	SAM and leaf development
gene21541	FvH4_6g00042	FvAS2	ASYMMETRIC LEAVES 2	4.14553	1.96276	1.61934	SAM and leaf development
gene24088	FvH4_1g15510	FvASL1	ASYMMETRIC LEAVES 2-LIKE 1	4.33831	14.3228	2.13136	SAM and leaf development
gene37645	FvH4_6g25090	FvBOP2	BLADE ON PETIOLE2	38.8614	57.7677	13.6608	SAM and leaf development
gene14025	FvH4_3g34410	FvPRS1	PRESSED FLOWER 1	7.76658	7.84484	1.11602	SAM and leaf development
gene18030	FvH4_6g21160	FvAMP1	ALTERED MERISTEM PROGRAM 1	39.8763	22.1522	25.1219	SAM and leaf development
gene30370	FvH4_3g05220	FvTCP2	TEOSINTE BRANCHED1, CYCLOIDEA, and PROLIFERATING CELL NUCLEAR ANTIGEN BINDING FACTOR	24.1718	39.7172	46.1305	SAM and leaf development
gene27171	FvH4_3g18740	FvTCP4	TEOSINTE BRANCHED1, CYCLOIDEA, and PROLIFERATING CELL NUCLEAR ANTIGEN BINDING FACTOR	6.61514	6.49192	7.87426	SAM and leaf development
gene11864	FvH4_1g05660	FvTIE1	TCP INTERACTOR CONTAINING EAR MOTIF PROTEIN 1	0.0273869	0	0.0346936	SAM and leaf development
gene03606	FvH4_4g26090	FvKNAT6	KNOTTED1-LIKE HOMEOBOX GENE 6	127.584	28.1428	50.6375	SAM and leaf development
gene31590	FvH4_6g07460	FvKNAT2	KNOTTED1-LIKE HOMEOBOX GENE 2	261.453	313.065	748.695	SAM and leaf development
gene03938	FvH4_7g11260	FvFIL/YAB1	FILAMENTOUS FLOWER/YABBY1	41.0512	237.766	121.797	SAM and leaf development
gene31056	FvH4_1g03040	FvYAB5	YABBY5	33.6347	13.8212	18.7332	SAM and leaf development
gene32251	FvH4_5g00320	FvYAB2	YABBY2	229.041	213.894	96.0174	SAM and leaf development
gene04566	FvH4_4g29650	FvCRC	CRABS CLAW	0.175206	0.295207	426.474	SAM and leaf development
gene30097	FvH4_6g17450	FvLMI1	LATE MERISTEM IDENTITY1	12.9888	34.1896	2.75997	SAM and leaf development
gene19065	FvH4_7g13840	FvLMI2	LATE MERISTEM IDENTITY2	0.309002	0.0935973	0.470692	SAM and leaf development
gene24906	FvH4_c6g00040	FvWEE1	WEE1 KINASE HOMOLOG	29.7711	17.4388	24.7392	SAM and leaf development
gene22175	FvH4_4g25630	FvDRN	DORNROSCHEN	2.66045	14.0687	19.2873	SAM and leaf development
gene36521	FvH4_3g46101	FvRGD3	ROOT GROWTH DEFECTIVE 3	30.6111	16.5538	32.6104	SAM and leaf development
gene18593	FvH4_7g17930	FvNGA1	NGATHA1	1.73118	4.56871	5.43943	SAM and leaf development
gene29414	FvH4_1g14320	FvSAW1	SAWTOOTH 1	2.20278	5.94846	1.77013	SAM and leaf development
gene29439	FvH4_1g14721	FvSAW2	SAWTOOTH 2	12.2058	7.02564	10.7574	SAM and leaf development
gene21524	FvH4_6g00160	FvBBM1	BABY BOOM1	0	0.00519615	0.183015	SAM and leaf development
gene24852	FvH4_3g06720	FvAG	AGAMOUS	0.551105	6.14684	218.7	Flower development
gene04562	FvH4_4g29600	FvAP1	APETALA1	29.7713	341.719	69.0187	Flower development
gene23876	FvH4_1g16350	FvAP2	APETALA 2	99.7147	11.2767	20.8969	Flower development
gene14896	FvH4_1g12260	FvAP3	APETALA 3	0.14741	12.5446	9.44265	Flower development
gene11267	FvH4_2g27860	FvPIa	PISTILLATAa	0.158391	39.3247	24.2714	Flower development
gene11268	FvH4_2g27870	FvPIb	PISTILLATAb	0	22.5764	18.2363	Flower development
gene04229	FvH4_6g46420	FvSEP1	SEPALLATA1	2.77034	23.8732	36.1871	Flower development
gene07201	FvH4_4g23530	FvSEP3	SEPALLATA3	0.160783	47.3153	220.729	Flower development
gene26118	FvH4_5g13510	FvSEP4	SEPALLATA4	2.3483	227.314	207.624	Flower development
gene04563	FvH4_4g29610	FvSEP1-like	SEP1-like	4.46895	22.2064	19.3307	Flower development
gene05644	FvH4_1g18270	FvANT	AINTEGUMENTA/DRAGON	84.8243	77.4021	39.5701	Flower development
gene16919	FvH4_4g08100	FvAIL5 /PLT5	AINTEGUMENTA-LIKE 5/PLETHORA 5	26.923	24.6268	24.2295	Flower development
gene20828	FvH4_1g19530	FvAIL6/PLT3	AINTEGUMENTA-LIKE 6/PLETHORA 3	34.3826	37.2955	58.4719	Flower development
gene20607	FvH4_3g43100	FvPLT1	PLETHORA 1	0	0	0	Flower development
gene24094	FvH4_1g15470	FvUIF1	ULT1 INTERACTING FACTOR 1	0.833488	0.989293	1.20692	Flower development
gene13354	FvH4_7g28740	FvAGL42	AGAMOUS-LIKE 42	35.3639	8.98965	1.26233	Flower development
gene14763	FvH4_1g13230	FvHAN	HANABA TANARU	35.8007	41.8359	31.3382	Flower development
gene23813	FvH4_1g16260	FvCLF	CURLY LEAF	10.0695	6.05241	10.0879	Flower development
gene03731	FvH4_4g27300	FvJAG	JAGGED	3.88739	10.9175	23.0999	Flower development
gene20044	FvH4_3g12221	FvSUP	SUPERMAN	0.0820874	9.49816	17.4961	Flower development
gene26318	FvH4_7g23040	FvRBE	RABBIT EARS	14.7813	9.1336	0.188485	Flower development
gene30156	FvH4_6g17990	FvPTL	PETAL LOSS	21.4974	19.9336	15.2181	Flower development
gene10278	FvH4_6g44900	FvULT1	ULTRAPETALA 1	70.5071	100.415	174.141	Flower development
gene29726	FvH4_3g08880	FvSPL3	SQUAMOSA PROMOTER BINDING PROTEIN-LIKE 3	7.16967	34.5216	14.3911	Flower development
gene35436	FvH4_1g16230	FvSPT	SPATULA	11.1664	15.2179	28.4585	Flower development
gene24494	FvH4_6g37880	FvSHP1/AGL1	SHATTERPROOF 1/AGAMOUS-LIKE 1	1.45941	0.595922	109.885	Flower development
gene31817	FvH4_5g02960	FvBEL1	BELL 1	0.272228	0.367859	0.199616	Flower development
gene18718	FvH4_6g12810	FvVAN/PNY	VAAMANA/PENNYWISE	24.9831	34.6916	33.8008	Flower development
gene38202	FvH4_3g31640	FvPNF	POUND-FOOLISH	35.1219	30.1784	50.5263	Flower development
gene06790	FvH4_4g17630	FvPUCHI	PUCHI	1.24492	0.429216	0.0714228	Flower development
gene09115	FvH4_2g34280	FvHEC1	HECATE 1	0.144345	0.0509463	0.558008	Flower development
gene23830	FvH4_1g16130	FvHEC2	HECATE 2	0	0.0687299	2.69742	Flower development
gene17881	FvH4_1g24110	FvHEC3	HECATE 3	0	0.0347658	0.863857	Flower development
gene11636	FvH4_2g29150	FvSHN2	SHINE 2	0.185994	0.913418	0.966936	Flower development
gene31040	FvH4_1g03190	FvSHN1	SHINE 1	0.0276567	0.166302	0.0467139	Flower development
gene27092	FvH4_5g32950	FvSHN3	SHINE 3	0.0359892	0.0883868	0	Flower development
gene01855	FvH4_5g10410	FvNGA2	NGATHA2	1.17698	9.22885	2.12342	Flower development
gene10501	FvH4_5g22100	FvMYC2	MYC2	103.606	69.1341	99.2461	Flower development
gene17679	FvH4_6g25920	FvMYC4	MYC4	0	0	0	Flower development
gene21989	FvH4_6g24370	FvMYC5	MYC5	0.357889	3.06593	2.21872	Flower development
gene30667	FvH4_3g03170	FvDYT1	DYSFUNCTIONAL TAPETUM 1	2.60561	0.90811	1.95603	Flower development
gene23716	FvH4_2g15470	FvAMSa	ABORTED MICROSPORESa	0.403579	0.406475	0.529162	Flower development
gene23715	FvH4_2g15460	FvAMSb	ABORTED MICROSPORESb	0	0	0	Flower development
gene21797	FvH4_3g24830	FvTGA9	TGACG (TGA) MOTIF-BINDING PROTEIN 9	5.72714	2.06836	4.27103	Flower development
gene00517	FvH4_6g22750	FvTGA10	TGACG (TGA) MOTIF-BINDING PROTEIN 10	0	0.0160626	1.30456	Flower development
gene25646	FvH4_6g32240	FvCNA	CORONA	113.563	75.134	186.955	Flower development
gene13306	FvH4_7g29130	FvHDG1	HOMEODOMAIN GLABROUS 1	3.88948	5.50974	7.0724	Flower development
gene19572	FvH4_3g02520	FvPDF2	PREFOLDIN 2	35.7829	64.3176	63.4304	Flower development
gene23926	FvH4_6g43390	FvHDG2	HOMEODOMAIN GLABROUS 2	31.9981	63.0087	65.6086	Flower development
gene13751	FvH4_5g22940	FvHDG5	HOMEODOMAIN GLABROUS 5	29.6019	45.571	40.1538	Flower development
gene09297	FvH4_5g18090	FvHDG11	HOMEODOMAIN GLABROUS 11	19.4117	18.1277	11.2401	Flower development
gene23202	FvH4_7g19850	FvPWR	POWERDRESS	36.9623	30.7075	47.5769	Flower development

## Sheet: MADS-box genes
The MADS-box genes
GeneID	SAM_TPM	FM_TPM	REM_TPM	symbol	Description
FvH4_1g02960	0	0	0	AGL18	AGAMOUS-like 18
FvH4_1g12260	0.140097	12.5686	9.33779	AP3,ATAP3	K-box region and MADS-box transcription factor family protein
FvH4_1g18960	0	0	0	AGL18	AGAMOUS-like 18
FvH4_1g19110	0	0	0	AGL21	AGAMOUS-like 21
FvH4_1g19710	144.695	145.714	8.94147	AGL22,SVP	K-box region and MADS-box transcription factor family protein
FvH4_2g02230	0	0	0	AGL62	AGAMOUS-like 62
FvH4_2g02270	0	0	0	AGL62	AGAMOUS-like 62
FvH4_2g03020	0	0	0	AGL61,DIA	AGAMOUS-like 61
FvH4_2g03030	0	0	0	AGL62	AGAMOUS-like 62
FvH4_2g11353	0.0252277	0.0261542	0	AGL44,ANR1	AGAMOUS-like 44
FvH4_2g23771	0	0.0274581	0.0157013	AGL52	AGAMOUS-like 52
FvH4_2g27520	0	0	0		MADS-box transcription factor family protein
FvH4_2g27630	0	0	0	AGL38,PHE2	AGAMOUS-like 38
FvH4_2g27860	0.15201	38.3605	23.8913	PI	K-box region and MADS-box transcription factor family protein
FvH4_2g27870	0	22.9436	18.461	PI	K-box region and MADS-box transcription factor family protein
FvH4_2g31102	0	0	0	AGL13	AGAMOUS-like 13
FvH4_2g38970	2.44754	66.8034	100.243	AP3,ATAP3	K-box region and MADS-box transcription factor family protein
FvH4_2g40280	0	0	0	AGL62	AGAMOUS-like 62
FvH4_3g02880	0	0	0	AGL29	AGAMOUS-like 29
FvH4_3g03630	5.51613	15.7107	2.20593	AGL24	AGAMOUS-like 24
FvH4_3g05940	0.584092	0.567766	0.767566	AGL29	AGAMOUS-like 29
FvH4_3g06720	0.675504	6.51878	225.009	AG	K-box region and MADS-box transcription factor family protein
FvH4_3g11290	10.3699	64.5126	39.0563	AGL6	AGAMOUS-like 6
FvH4_3g12460	0	0.0358063	0.448585	ABS,AGL32,TT16	K-box region and MADS-box transcription factor family protein
FvH4_3g14511	0.0357531	0.15922	0.434913		MADS-box transcription factor family protein
FvH4_3g19300	0	0	0	AGL38,PHE2	AGAMOUS-like 38
FvH4_3g33170	0	0	0	AGL56	AGAMOUS-like-56
FvH4_3g36320	0.0291823	0.053432	0.0488314	AGL29	AGAMOUS-like 29
FvH4_4g07700	30.0847	30.383	37.1585	AGL82	AGAMOUS-like 82
FvH4_4g08001	0	0	0	AGL103	AGAMOUS-like 103
FvH4_4g19210	0	0	0	AGL24	AGAMOUS-like 24
FvH4_4g20680	0	0	0	AGL18	AGAMOUS-like 18
FvH4_4g27110	221.739	72.4256	115.938	AGL22,SVP	K-box region and MADS-box transcription factor family protein
FvH4_4g27440	112.536	6.61559	10.8799	AGL22,SVP	K-box region and MADS-box transcription factor family protein
FvH4_4g29600	30.6039	351.591	71.7617	AGL7,AP1	K-box region and MADS-box transcription factor family protein
FvH4_4g29610	4.44173	22.947	19.9367	AGL3,SEP4	K-box region and MADS-box transcription factor family protein
FvH4_4g31160	0	0	0.060921	AGL30	AGAMOUS-like 30
FvH4_4g35860	0.297767	0	0	AGL62	AGAMOUS-like 62
FvH4_5g05030	0	0	0	AGL15	AGAMOUS-like 15
FvH4_5g08530	0.105857	0.0726833	0.0909586	AGL8,FUL	AGAMOUS-like 8
FvH4_5g13500	10.7169	66.293	53.2806	AGL8,FUL	AGAMOUS-like 8
FvH4_5g13510	2.4917	227.646	210.24	AGL2,SEP1	K-box region and MADS-box transcription factor family protein
FvH4_5g14780	2.34826	1.74087	2.62928	AGL65	AGAMOUS-like 65
FvH4_5g21500	0.0412116	0.0345764	0.0172401	AGL36	AGAMOUS-like 36
FvH4_5g27070	0	0	0	AGL82	AGAMOUS-like 82
FvH4_5g29232	0	0	0	AGL24	AGAMOUS-like 24
FvH4_5g32190	0.334139	0	0.285161	AGL18	AGAMOUS-like 18
FvH4_5g32540	0.0178896	0	0.581428	AGL11,STK	K-box region and MADS-box transcription factor family protein
FvH4_5g32850	0	0	0	AGL12,XAL1	AGAMOUS-like 12
FvH4_5g34080	0.269408	0.0751743	0	AGL16	AGAMOUS-like 16
FvH4_5g34740	0	0	0	AGL61,DIA	AGAMOUS-like 61
FvH4_5g35400	64.7392	46.6645	76.6545	AGL22,SVP	K-box region and MADS-box transcription factor family protein
FvH4_5g38110	0	0	0	AGL104	AGAMOUS-like 104
FvH4_6g03620	0	0	0	AGL61,DIA	AGAMOUS-like 61
FvH4_6g03640	0	0	0.0302272	AGL62	AGAMOUS-like 62
FvH4_6g07481	0	0	0	AGL15	AGAMOUS-like 15
FvH4_6g08460	0	0	0	AGL80,FEM111	AGAMOUS-like 80
FvH4_6g08570	0	0	0	AGL80,FEM111	AGAMOUS-like 80
FvH4_6g19060	0	0	0	AGL15	AGAMOUS-like 15
FvH4_6g21070	0	0	0	AGL57	AGAMOUS-like 57
FvH4_6g21170	2.83854	1.92853	3.15903	AGL80,FEM111	AGAMOUS-like 80
FvH4_6g24141	0.0610025	0.32741	0.236406	AGL15	AGAMOUS-like 15
FvH4_6g27190	0	0	0	AGL62	AGAMOUS-like 62
FvH4_6g32050	0	0.0871031	0.107402	AGL61,DIA	AGAMOUS-like 61
FvH4_6g35390	0	0	0	AGL62	AGAMOUS-like 62
FvH4_6g35690	0.0230715	0.0717565	0	AGL62	AGAMOUS-like 62
FvH4_6g37880	1.45002	0.61193	111.88	AGL1,SHP1	K-box region and MADS-box transcription factor family protein
FvH4_6g43410	0	0	0	AGL80,FEM111	AGAMOUS-like 80
FvH4_6g46410	23.8166	93.0888	40.5962	AGL8,FUL	AGAMOUS-like 8
FvH4_6g46420	2.82295	23.9791	35.8895	AGL4,SEP2	K-box region and MADS-box transcription factor family protein
FvH4_6g46801	0.0668541	0	0	AGL78	AGAMOUS-like 78
FvH4_6g50720	0	0	0	AGL62	AGAMOUS-like 62
FvH4_6g53490	0	0	0		MADS-box transcription factor family protein
FvH4_6g53741	3.17175	0.499672	0.350255	AGL7,AP1	K-box region and MADS-box transcription factor family protein
FvH4_7g01720	34.4931	3.5141	69.5277	AGL15	AGAMOUS-like 15
FvH4_7g01990	0	0	0	AGL82	AGAMOUS-like 82
FvH4_7g02110	0.215632	0.109792	0.170551	AGL82	AGAMOUS-like 82
FvH4_7g04141	0	0	0.0279287		MADS-box transcription factor family protein
FvH4_7g09730	0	0	0	AGL80,FEM111	AGAMOUS-like 80
FvH4_7g12670	0.134707	41.7884	72.2315	AGL6	AGAMOUS-like 6
FvH4_7g12700	137.948	31.5955	10.6546	AGL20,ATSOC1,SOC1	AGAMOUS-like 20
FvH4_7g28690	2.05386	5.51776	0.366865	AGL6	AGAMOUS-like 6
FvH4_7g28740	38.5763	9.85044	1.33715	AGL42	AGAMOUS-like 42
FvH4_7g29460	0	0.0195097	0	AGL15	AGAMOUS-like 15
