# Supplementary material for: Gene Expression Profiling of the Shoot Meristematic Tissues in Woodland Strawberry Fragaria vesca
Source: Front Plant Sci. 2019 Dec 13;10:1624. doi: 10.3389/fpls.2019.01624 (PMC6923813; doi:10.3389/fpls.2019.01624)
Supplement: Supplementary file 5 [file DataSheet_5.xlsx]

## Sheet: homone_gene
Supplementary Data 5. Expression levels of hormone genes in the three meristems
Gene ID (v2.0.a2)	Gene ID (v4.0.a2)	Hormone	Symbol	SAM	FM	REM
gene07687	FvH4_3g26980	ABA	FvAAO3	10.0159	5.69813	10.1673
gene14429	FvH4_7g02370	ABA	FvABA2	22.6154	18.1553	19.2775
gene09110	FvH4_2g34330	ABA	FvABF3	77.999	46.8129	85.497
gene28250	FvH4_2g05900	ABA	FvABF4	16.0694	6.83696	15.4672
gene17562	FvH4_2g19630	ABA	FvABI3	0	0	0.00611926
gene30280	FvH4_6g18510	ABA	FvABI5	0.381077	0.0992729	0.103767
gene02502	FvH4_6g23800	ABA	FvCHLH/ABAR	22.6478	25.0253	35.1957
gene05409	FvH4_6g35360	ABA	FvCPK11	102.054	128.707	127.036
gene31992	FvH4_5g03610	ABA	FvCPK3	46.2579	37.6989	50.8414
gene27440	FvH4_2g11790	ABA	FvCPK4	21.1572	10.7498	20.345
gene17341	FvH4_2g16880	ABA	FvCPK6	45.1018	31.6932	54.9462
gene10931	FvH4_5g25150	ABA	FvCYP707A1/3	3.26241	0.483631	1.36459
gene30191	FvH4_3g36810	ABA	FvCYP707A2	0	0.230926	0.264719
gene09100	FvH4_2g34420	ABA	FvCYP707A4a	2.03021	0.298346	5.11254
gene28569	FvH4_2g06010	ABA	FvCYP707A4b	16.4415	0.259467	0.70735
gene31335	FvH4_3g16730	ABA	FvNCED3	23.91	72.7268	12.7764
gene30616	FvH4_3g05440	ABA	FvNCED5	0.854314	0.295708	0.0671131
gene24386	FvH4_4g05900	ABA	FvNCED6	0	0	0
gene31902	FvH4_2g06910	ABA	FvOST1	68.4505	92.2286	63.3634
gene15427	FvH4_2g31450	ABA	FvPP2C1	63.7611	53.1324	79.0373
gene12691	FvH4_1g08010	ABA	FvPP2C2	2.73047	5.6766	7.9439
gene07500	FvH4_6g34170	ABA	FvPP2C3	46.653	39.377	46.382
gene03578	FvH4_4g25760	ABA	FvPP2C4	0.907835	1.52948	2.71832
gene11291	FvH4_1g06040	ABA	FvPP2C5	23.775	29.1698	36.6874
gene01934	FvH4_3g37010	ABA	FvPP2C6	29.8077	43.2605	51.6762
gene26316	FvH4_7g23060	ABA	FvPP2C7	121.437	131.52	159.44
gene32088	FvH4_5g04500	ABA	FvPP2C8	0	0.698088	0.766557
gene13100	FvH4_7g31130	ABA	FvPYL10	56.7332	54.93	56.3126
gene29673	FvH4_3g07720	ABA	FvPYL11	2.87292	0.962076	0.434902
gene02675	FvH4_2g32040	ABA	FvPYL2	0	0.0965524	0.317955
gene05244	FvH4_4g09440	ABA	FvPYL3	0.944554	0.991006	1.30795
gene13778	FvH4_6g10740	ABA	FvPYL4	6.13855	8.93672	73.9985
gene21044	FvH4_7g25180	ABA	FvPYL5	9.4647	4.7186	1.47093
gene29674	FvH4_3g07710	ABA	FvPYL6	38.5	64.1656	46.2484
gene29672	FvH4_3g07731	ABA	FvPYL7	1.77999	0.597603	0.663278
gene40068	FvH4_3g16470	ABA	FvPYL8	71.5734	88.3084	68.2392
gene38408	FvH4_7g16220	ABA	FvPYL9	290.73	275.009	301.602
gene10508	FvH4_5g22060	ABA	FvPYR1	11.9118	2.0381	2.45515
gene11969	FvH4_5g36724	ABA	FvSnRK2.10	21.3954	7.07698	12.8651
gene24096	FvH4_1g15440	ABA	FvSnRK2.3	71.3721	78.2308	102.131
gene10769	FvH4_5g20490	ABA	FvSnRK2.4	21.9711	16.8235	22.2062
gene11031	FvH4_5g28850	ABA	FvSnRK2.5	69.4995	66.9219	84.7986
gene16244	FvH4_1g20310	ABA	FvSnRK2.6	12.8464	15.5752	33.656
gene37433	FvH4_5g36721	ABA	FvSnRK2.7	28.9239	15.096	23.5566
gene11969	FvH4_5g36724	ABA	FvSnRK2.8	21.3954	7.07698	12.8651
gene06595	FvH4_4g13050	ABA	FvSnRK2.9	0	0	0.054457
gene27958	FvH4_1g16080	ABA	FvZEP1	7.03393	6.18808	8.79893
gene27729	FvH4_2g24150	AUXIN	FvABP1	39.1999	62.7436	56.5624
gene01376	FvH4_6g54140	AUXIN	FvAFB2	220.395	248.123	256.018
gene12066	FvH4_5g35920	AUXIN	FvAFB5	109.117	100.72	113.867
gene06434	FvH4_5g09310	AUXIN	FvARF1	123.616	97.0646	174.77
gene23280	FvH4_7g19350	AUXIN	FvARF10	0.114625	0.389442	0.0915438
gene25123	FvH4_5g11690	AUXIN	FvARF11	58.9973	35.0583	40.3232
gene27792	FvH4_2g24730	AUXIN	FvARF12	19.5581	18.5758	14.5568
gene28545	FvH4_3g32860	AUXIN	FvARF13	58.544	57.2693	89.1923
gene29255	FvH4_5g27860	AUXIN	FvARF14	61.1445	56.7768	64.1089
gene29771	FvH4_3g08450	AUXIN	FvARF15	46.8452	89.4557	117.097
gene30394	FvH4_3g05010	AUXIN	FvARF16	95.9364	52.7059	76.2647
gene31631	FvH4_1g27650	AUXIN	FvARF17	53.0617	20.2527	46.5264
gene23072	FvH4_6g33200	AUXIN	FvARF18	0.0392609	0	0
gene16057	FvH4_5g38770	AUXIN	FvARF19	11.8488	13.4546	14.7985
gene08492	FvH4_2g38760	AUXIN	FvARF2	136.216	224.728	278.613
gene09733	FvH4_6g15960	AUXIN	FvARF3	10.4256	14.124	13.372
gene12224	FvH4_4g06190	AUXIN	FvARF4	22.8749	20.0894	25.7373
gene12917	FvH4_1g09150	AUXIN	FvARF5	12.9533	6.41975	10.8694
gene16050	FvH4_5g38700	AUXIN	FvARF6	4.0498	3.57063	2.95207
gene16844	FvH4_3g32000	AUXIN	FvARF7	11.1622	7.26067	6.61558
gene18832	FvH4_6g11840	AUXIN	FvAUX1	30.3988	35.3944	58.9166
gene22838	FvH4_2g04750	AUXIN	FvGH3.1	37.1263	21.7007	15.2054
gene18907	FvH4_7g16030	AUXIN	FvGH3.11	108.978	124.085	114.556
gene27740	FvH4_2g24250	AUXIN	FvGH3.12	11.6806	6.75091	7.22602
gene23026	FvH4_4g22430	AUXIN	FvGH3.17	0.046019	0.0493876	0.277188
gene10286	FvH4_6g44990	AUXIN	FvGH3.18	10.1857	5.86496	13.7009
gene24005	FvH4_1g16980	AUXIN	FvGH3.2	0.448166	1.62137	3.59296
gene03265	FvH4_3g21460	AUXIN	FvGH3.5	117.835	200.768	32.128
gene30702	FvH4_3g04010	AUXIN	FvGH3.6	1.11374	7.40631	5.50672
gene10566	FvH4_2g25330	AUXIN	FvGH3.9	0.141959	1.42528	2.99658
gene16569	FvH4_6g02870	AUXIN	FvIAA1	18.3375	2.83546	6.0127
gene25723	FvH4_6g32450	AUXIN	FvIAA13	110.705	85.793	116.34
gene25817	FvH4_6g31930	AUXIN	FvIAA14	189.745	240.966	231.231
gene26830	FvH4_5g33790	AUXIN	FvIAA15	100.695	93.7562	98.2742
gene32593	FvH4_4g02260	AUXIN	FvIAA18	4.27172	0.169413	0.343728
gene32595	FvH4_4g02280	AUXIN	FvIAA19	0.659579	0.711077	0.537449
gene16571	FvH4_6g02860	AUXIN	FvIAA2	126.298	57.5164	140.749
gene08194	FvH4_2g22520	AUXIN	FvIAA20	11.1242	17.0531	7.03295
gene27891	FvH4_4g04700	AUXIN	FvIAA21	24.7828	13.6204	20.5028
gene09007	FvH4_2g35280	AUXIN	FvIAA22	14.1639	1.01686	3.12915
gene05555	FvH4_1g18900	AUXIN	FvIAA23	523.16	547.388	583.473
gene22779	FvH4_4g21780	AUXIN	FvIAA24	0.30467	0.52015	0.592837
gene30941	FvH4_1g04240	AUXIN	FvIAA25	29.118	1.14628	0.576601
gene05990	FvH4_6g30860	AUXIN	FvIAA26	2.87655	0.713445	3.47795
gene31097	FvH4_1g02700	AUXIN	FvIAA29	2.15715	1.81339	3.16488
gene03675	FvH4_4g26690	AUXIN	FvIAA32	11.5801	6.25691	11.2382
gene16979	FvH4_4g08200	AUXIN	FvIAA33	0.324138	1.14405	2.21916
gene05993	FvH4_6g30850	AUXIN	FvIAA4	12.799	13.1199	11.0983
gene08191	FvH4_2g22530	AUXIN	FvIAA6	6.69379	1.56886	2.5745
gene08336	FvH4_2g20500	AUXIN	FvIAA7	32.536	24.593	24.9067
gene11861	FvH4_1g05630	AUXIN	FvIAA9	489.168	286.165	303.103
gene20938	FvH4_7g24200	AUXIN	FvLAX1	4.80149	13.6994	28.3555
gene11123	FvH4_2g26410	AUXIN	FvLAX2	5.29779	15.0728	8.88323
gene07619	FvH4_2g01570	AUXIN	FvLAX3	71.4278	136.91	207.373
gene09384	FvH4_5g17310	AUXIN	FvPIN1	93.8172	148.934	192.308
gene12312	FvH4_4g06850	AUXIN	FvPIN10	0	0.0082736	0.030394
gene12314	FvH4_4g06870	AUXIN	FvPIN2	0	0	0.00916048
gene37622	FvH4_6g25530	AUXIN	FvPIN3	3.71104	3.73085	6.57567
gene04070	FvH4_4g32450	AUXIN	FvPIN4	1.27768	1.5465	2.99572
gene16792	FvH4_6g00660	AUXIN	FvPIN5	0.53585	0.263665	0.233277
gene06077	FvH4_4g13941	AUXIN	FvPIN6	0	0	0.00854122
gene01267	FvH4_6g49240	AUXIN	FvPIN8	0.0470473	0.014421	0.159177
gene05434	FvH4_6g35590	AUXIN	FvPIN9	0.696657	0.39549	0.368142
gene03586	FvH4_4g25850	AUXIN	FvTAA1	0	0	0
gene37056	FvH4_5g05900	AUXIN	FvTAR1	0.137528	0.108712	0.0775893
gene31790	FvH4_5g05880	AUXIN	FvTAR2	9.08796	39.3464	17.6311
gene24947	FvH4_2g24840	AUXIN	FvTIR1	165.831	194.122	233.08
gene01005	FvH4_2g15120	AUXIN	FvYUC1	0	0	0
gene27796	FvH4_2g24750	AUXIN	FvYUC10	5.63237	9.92079	5.49198
gene06886	FvH4_4g17980	AUXIN	FvYUC11	0	0	0
gene30882	FvH4_1g04800	AUXIN	FvYUC2	5.37065	5.72717	3.72971
gene08377	FvH4_2g20150	AUXIN	FvYUC3	0	0	0
gene11728	FvH4_2g29930	AUXIN	FvYUC4	14.1833	17.4052	15.4269
gene32686	FvH4_2g14550	AUXIN	FvYUC5	0	0	0
gene08779	FvH4_2g36220	AUXIN	FvYUC6	0.0581983	0.173259	0.249582
gene00528	FvH4_4g05280	AUXIN	FvYUC7	0	0	0.0110524
gene16076	FvH4_5g30840	BR	FvBAK1	25.778	18.3081	15.9235
gene29693	FvH4_3g07480	BR	FvBIN2	184.688	114.66	133.771
gene21119	FvH4_1g23130	BR	FvBRI1	64.432	48.6977	57.3099
gene01195	FvH4_3g41420	BR	FvBRL1	1.54697	1.95602	5.4678
gene17222	FvH4_2g16320	BR	FvBSK1a	36.9632	34.3862	42.1544
gene08625	FvH4_2g37600	BR	FvBSK1b	59.7167	46.8397	68.4017
gene27763	FvH4_2g24460	BR	FvBSL1	24.3268	19.9909	27.7069
gene23161	FvH4_3g26300	BR	FvBSL3	37.6071	30.1194	41.8831
gene15105	FvH4_2g40170	BR	FvBZR1	64.3096	89.1879	68.1185
gene29525	FvH4_1g14040	BR	FvBZR2	68.2074	193.725	162.764
gene20962	FvH4_7g24370	BR	FvCPD	347.028	35.4157	20.5044
gene30974	FvH4_1g03910	BR	FvCYP72B1	4.53196	6.20555	5.90351
gene18791	FvH4_6g12130	BR	FvDET2	13.4617	15.7208	10.7669
gene00831	FvH4_4g36730	BR	FvDWF1	354.299	358.762	361.806
gene14783	FvH4_1g13420	BR	FvDWF4	5.843	3.08525	4.90106
gene29270	FvH4_5g27210	BR	FvVH1/BRL2	6.38739	3.23398	3.34791
gene04136	FvH4_4g33130	CYTOKININ	FvAHK4	63.624	12.2397	26.1845
gene22351	FvH4_6g04970	CYTOKININ	FvAHP1b	149.59	204.41	547.761
gene27751	FvH4_2g24320	CYTOKININ	FvAHP2	0	0	0
gene25730	FvH4_6g32380	CYTOKININ	FvAHP4a	0.817128	0	1.41894
gene09006	FvH4_2g35290	CYTOKININ	FvAHP4b	0.0206409	0	0
gene15747	FvH4_6g29740	CYTOKININ	FvAHP6	3.67675	7.95623	7.44603
gene05178	FvH4_4g19230	CYTOKININ	FvARR1	50.2601	74.768	70.9453
gene06943	FvH4_4g24870	CYTOKININ	FvARR11	2.95187	3.01417	5.04807
gene15029	FvH4_2g40890	CYTOKININ	FvARR12a	16.2397	5.26642	11.1611
gene10041	FvH4_1g01300	CYTOKININ	FvARR12b	2.0682	6.03151	9.52727
gene15958	FvH4_6g29050	CYTOKININ	FvARR12c	0	0	0
gene21358	FvH4_7g25970	CYTOKININ	FvARR16	38.4343	90.4013	68.2569
gene08409	FvH4_2g19810	CYTOKININ	FvARR24a	0.247345	0	0.226898
gene16714	FvH4_6g01360	CYTOKININ	FvARR24b	0	0	0
gene06245	FvH4_4g33470	CYTOKININ	FvARR2a	29.6976	24.9753	39.1784
gene13325	FvH4_7g28980	CYTOKININ	FvARR2b	0	0	0
gene00726	FvH4_4g35230	CYTOKININ	FvARR4	112.19	60.0208	74.5286
gene09501	FvH4_5g16240	CYTOKININ	FvARR5	160.427	41.8888	28.985
gene21885	FvH4_6g25290	CYTOKININ	FvARR9a	13.2595	9.8504	14.4214
gene14296	FvH4_7g02970	CYTOKININ	FvARR9b	21.4601	6.25779	8.47915
gene11196	FvH4_2g27180	CYTOKININ	FvARR9c	3.0366	0.812566	9.11271
gene28096	FvH4_3g40540	CYTOKININ	FvARR9d	0.0246242	0.0516606	0.0415918
gene14452	FvH4_7g02150	CYTOKININ	FvCKX1(degradation)	0.581324	0.196225	0.153066
gene30654	FvH4_3g03260	CYTOKININ	FvCKX2	0	0.0607259	0.00891253
gene21961	FvH4_6g24620	CYTOKININ	FvCKX3	2.23201	0.319043	0
gene12649	FvH4_1g07620	CYTOKININ	FvCKX4	3.57928	4.30379	6.36161
gene12648	FvH4_1g07610	CYTOKININ	FvCKX5	0.0985417	0	0.044968
gene15382	FvH4_2g30990	CYTOKININ	FvCKX6	34.5075	28.2731	52.8924
gene30442	FvH4_3g04610	CYTOKININ	FvCKX7	2.25068	11.7939	2.41289
gene15204	FvH4_2g39230	CYTOKININ	FvCKX8	3.05948	5.02075	3.49556
gene22174	FvH4_6g06330	CYTOKININ	FvCKX9	54.7354	175.846	65.8534
gene22358	FvH4_6g04900	CYTOKININ	FvCKX10	64.9398	50.5697	64.105
gene10304	FvH4_6g45180	CYTOKININ	FvCYP735A1	0.0364819	0	0.0229278
gene03725	FvH4_4g27230	CYTOKININ	FvIPT1(biosynthesis)	0	0.0804407	0.334172
gene23509	FvH4_3g29650	CYTOKININ	FvIPT2	13.7321	8.16017	12.7579
gene30601	FvH4_3g05590	CYTOKININ	FvIPT3	0.33949	0.46575	2.74765
gene27343	FvH4_3g17710	CYTOKININ	FvIPT4	0.178902	0.400423	0.314478
gene27842	FvH4_2g23840	CYTOKININ	FvIPT5	0	0	0.013455
gene06080	FvH4_4g14440	CYTOKININ	FvIPT6	0	0	0
gene16128	FvH4_3g31870	CYTOKININ	FvLOG1(activation)	9.09886	20.7641	35.6673
gene30641	FvH4_3g03400	CYTOKININ	FvLOG2	3.46551	27.7237	19.0637
gene09744	FvH4_6g16020	CYTOKININ	FvLOG3	126.677	91.2778	106.351
gene15306	FvH4_6g20040	CYTOKININ	FvLOG4	12.4053	64.7416	31.1842
gene08500	FvH4_2g38680	CYTOKININ	FvLOG5	13.3842	5.9485	10.3576
gene02714	FvH4_2g31610	CYTOKININ	FvLOG6	150.296	117.199	128.727
gene30448	FvH4_3g04550	CYTOKININ	FvLOG7	0.0462283	4.68744	53.035
gene30673	FvH4_3g04250	CYTOKININ	FvLOG8	5.94868	24.6961	31.8238
gene30477	FvH4_3g04300	CYTOKININ	FvLOG9	3.06908	44.737	69.8281
gene08509	FvH4_2g38600	CYTOKININ	FvGLU1-1(reactivation)	5.38268	8.03827	8.38972
gene20641	FvH4_3g43503	CYTOKININ	FvGLU1-2	0.0108176	0.049859	0.111554
gene26794	FvH4_7g00214	CYTOKININ	FvGLU1-5	153.732	26.4667	21.8597
gene21990	FvH4_6g24360	CYTOKININ	FvZOG1(inactivation)	0	0.287666	0.0419342
gene01202	FvH4_6g42090	Ethylene	FvACO1	1.48114	6.37796	12.7479
gene19733	FvH4_3g01280	Ethylene	FvACO2	459.19	494.597	783.682
gene11261	FvH4_2g27800	Ethylene	FvACO3	0	0	0
gene11421	FvH4_1g07181	Ethylene	FvACO4	0.850004	0.280828	0.492006
gene11424	FvH4_1g07190	Ethylene	FvACO5	0.0459281	0	0
gene31839	FvH4_5g03160	Ethylene	FvACS1	1.82046	3.68224	1.08896
gene13406	FvH4_7g28260	Ethylene	FvACS10	11.4966	13.6624	15.0924
gene05580	FvH4_1g18490	Ethylene	FvACS3	0	0.0108233	0.00994018
gene02640	FvH4_2g32470	Ethylene	FvACS5	0	0	0
gene30630	FvH4_3g03480	Ethylene	FvACS6	0	0	0
gene11391	FvH4_1g06950	Ethylene	FvACS7	0	0	0
gene30682	FvH4_3g04180	Ethylene	FvACS8	0.0121522	0.261743	0.314182
gene32323	FvH4_5g00980	Ethylene	FvACS9	19.9769	23.647	22.1438
gene30145	FvH4_6g17880	Ethylene	FvCTR1	30.0078	18.8164	33.2353
gene11633	FvH4_2g29100	Ethylene	FvEBF1	53.6386	68.3758	67.357
gene31045	FvH4_1g03130	Ethylene	FvEBF2	35.3203	34.0026	29.6836
gene09749	FvH4_6g16040	Ethylene	FvEIN2	19.2346	18.8538	30.1734
gene25474	FvH4_1g28720	Ethylene	FvEIN3a	66.0479	79.8321	73.2033
gene00379	FvH4_7g04940	Ethylene	FvEIN3b	46.1845	44.4132	50.8162
gene16612	FvH4_6g02340	Ethylene	FvEIN4	15.3509	11.1216	17.0768
gene16484	FvH4_6g03690	Ethylene	FvEIN5a	22.3247	15.8851	25.2119
gene08498	FvH4_2g38700	Ethylene	FvEIN5b	31.915	31.5287	40.4477
gene23460	FvH4_7g18720	Ethylene	FvEIN5c	0.293737	0.734492	0.693844
gene11442	FvH4_4g03470	Ethylene	FvERF1	0.24547	0.451254	1.29236
gene11090	FvH4_2g26120	Ethylene	FvERS1	29.2609	33.5519	37.125
gene21106	FvH4_1g23240	Ethylene	FvETR1	13.6476	12.0251	15.5157
gene32532	FvH4_4g03030	Ethylene	FvETR2	25.878	22.6438	38.5251
gene02683	FvH4_2g31960	Ethylene	FvRTE1	22.8557	20.5154	23.7104
gene14910	FvH4_1g12370	Ethylene	FvRTH	30.4361	29.0232	28.7991
gene27801	FvH4_2g23440	GA	FvCPS3	4.72392	0.430926	1.73205
gene13360	FvH4_7g28670	GA	FvGA20ox1	10.7414	2.58673	5.35168
gene19438	FvH4_7g12581	GA	FvGA20ox2	3.97098	3.04926	3.68172
gene09034	FvH4_2g35050	GA	FvGA20ox4	0.104522	0	0
gene10825	FvH4_5g19970	GA	FvGA20ox5	0	0	0
gene05020	FvH4_4g20730	GA	FvGA2ox1	0.112286	2.12915	6.08975
gene03182	FvH4_3g21910	GA	FvGA2ox3	0.0170131	0	0
gene07935	FvH4_3g38920	GA	FvGA2ox4	0	0.0433281	0.087641
gene06004	FvH4_6g30780	GA	FvGA3ox1	28.1522	1.09795	0.303877
gene01056	FvH4_2g30040	GA	FvGA3ox2	0	0	0
gene01058	FvH4_2g30021	GA	FvGA3ox3	0	0	0
gene01059	FvH4_2g30020	GA	FvGA3ox4	0	0.189422	0.0261232
gene01060	FvH4_2g30010	GA	FvGA3ox5	0	0.219435	0.05465
gene11192	FvH4_2g27140	GA	FvGA3ox6	0	0.0125738	0
gene30958	FvH4_1g04080	GA	FvGAI	50.7413	65.1574	83.6299
gene22353	FvH4_6g04960	GA	FvGID1a	156.537	606.897	398.02
gene27756	FvH4_2g24370	GA	FvGID1b	138.673	445.741	317.057
gene20092	FvH4_3g11720	GA	FvGID1c	13.3505	129.774	156.645
gene10730	FvH4_5g21590	GA	FvKAO2a	0.0638531	0.120428	1.50692
gene10729	FvH4_5g21600	GA	FvKAO2b	0	0.00483498	0.10743
gene08176	FvH4_2g22670	GA	FvKO1	0.0850653	0	0.0455891
gene15052	FvH4_2g40650	GA	FvKO2	57.1448	43.9304	49.7775
gene19699	FvH4_3g14116	GA	FvKS1	9.21451	2.21395	6.5308
gene06210	FvH4_4g34110	GA	FvRGA1	75.2266	93.1925	76.5703
gene01356	FvH4_6g53920	GA	FvRGL1	0	0	0
gene22702	FvH4_5g07610	GA	FvRGL2	0	0.0290041	0
gene06947	FvH4_4g24820	GA	FvRGL3	0.23913	0.0890641	0.292992
gene00195	FvH4_2g33690	GA	FvSLY1	180.56	173.544	105.477
gene15587	FvH4_6g40870	GA	FvSNE	8.07641	8.32552	11.8762
gene15637	FvH4_6g19470	GA	FvSPY	20.9177	20.5088	28.2894
