# Supplementary material for: Gene Expression Profiling of the Shoot Meristematic Tissues in Woodland Strawberry Fragaria vesca
Source: Front Plant Sci. 2019 Dec 13;10:1624. doi: 10.3389/fpls.2019.01624 (PMC6923813; doi:10.3389/fpls.2019.01624)
Supplement: Supplementary file 6 [file DataSheet_6.xlsx]

## Sheet: cyan module genes
Supplementary Data 6. Genes in the meristem-specific module
GeneID	Symbol	Description	SAM	FM	REM	Anther10	Anther11	Anther12	Anther78	Anther9	Carpel10	Carpel12	Carpel78	Carpel9	Cortex1	Cortex2	Cortex3	Cortex4	Cortex5	Embryo3	Embryo4	Embryo5	Ghost3	Ghost4	Ghost5	Leaf	Ovule1	Pith1	Pith2	Pith3	Pith4	Pith5	Pollen	Seed2	Seedling	Style1	Style2	Wall1	Wall2	Wall3	Wall4	Wall5	Rg5D	Yw-22D	Yw5D	Rg-22D	Root	Root_P
FvH4_1g01120		Ribosomal protein L7Ae/L30e/S12e/Gadd45 family protein	23.0696	23.7529	22.5842	5.23843	3.26346	1.38196	7.65293	2.92575	9.14435	3.84701	10.7107	8.00505	8.43101	4.6514	2.43813	1.7323	2.0058	2.31563	6.58836	2.072	3.48911	3.03294	1.86319	7.84521	3.05566	9.7766	5.61077	2.27975	1.5581	2.62605	0	3.56453	2.59909	0.374348	0.182981	3.22468	3.80601	1.16676	0.755538	0.377923	3.35627	2.19686	2.34774	3.14416	6.40525	2.49345
FvH4_1g01360		Calcineurin-like metallo-phosphoesterase superfamily protein	9.64035	4.40387	7.11967	1.06766	0.68776	1.22059	1.32104	1.69037	1.9812	1.38358	1.91739	1.71481	2.35741	1.04371	1.29763	1.08868	1.59684	0.175984	0.869466	0.338581	0.874624	0.74522	0.733277	3.93254	1.22875	1.40428	1.30506	1.32379	1.34879	1.13939	0	1.39468	1.84405	1.41219	0.888005	1.1127	1.2231	0.747151	0.97023	0.914552	1.45137	1.24645	1.95822	1.8784	10.6527	4.24029
FvH4_1g01380		Calcineurin-like metallo-phosphoesterase superfamily protein	8.97757	3.17187	6.63869	0	0	0	0.0936605	0.109091	0.103703	0.0366905	0.23448	0.114414	0.100064	0.0943992	0.0999406	0	0	0	0	0	0	0	0.0852824	0.359289	0	0.106732	0	0	0	0.0552289	0	0	0	0	0.10888	0.0933255	0.08673	0.131589	0.0902638	0.0652018	0.0484279	0	0	0.0383748	4.15565	2.23469
FvH4_1g02310			328.83	568.3	458.094	62.4003	53.2795	31.8022	99.5095	50.2158	191.483	128.022	180.571	203.695	79.3856	45.978	35.4216	29.8074	21.1702	63.1275	58.0145	12.5769	42.582	38.7038	34.0579	112.287	147.627	76.0108	43.3768	42.2565	32.906	34.9662	0.607549	116.957	16.0754	45.4237	13.7698	78.8014	80.3162	34.9859	22.9652	13.0006	20.166	21.0541	19.9929	18.0149	172.477	29.0274
FvH4_1g04860			22.9191	11.7596	17.1091	5.54027	4.93587	4.91002	5.29609	7.19661	8.95387	3.3998	6.91412	6.42271	5.55657	2.72156	2.49189	1.8642	1.96139	1.2731	4.80601	2.70292	4.39487	4.26957	2.17433	5.07084	4.051	4.59393	2.27354	2.21454	1.76616	1.43536	2.99329	5.70602	1.16328	4.75661	3.96787	2.6529	3.6395	3.87507	3.03409	3.8222	1.66647	1.6161	1.38832	2.09439	12.1208	5.52615
FvH4_1g04870			2.9539	5.3455	4.60872	1.63148	1.85967	2.244	1.4703	4.2462	1.48483	1.56956	1.09045	1.85367	1.07456	0.743693	0.52884	0.499279	0.671913	1.38104	1.39775	0.687592	1.37601	1.56449	1.0917	1.4527	1.42904	1.0804	0.586107	0.753418	0.704968	0.877515	1.38963	1.36442	0.958453	2.50111	3.80453	0.861645	1.17963	1.29334	0.754697	0.988446	0.540366	0.703899	0.381401	0.634514	2.51397	1.45622
FvH4_1g04892			3.50829	5.78021	5.47527	2.40553	2.49012	2.29629	1.55416	3.6708	1.88493	1.51444	1.24774	1.34809	1.16575	0.783294	0.512047	0.326989	0.847505	0.366236	1.29802	0.579853	0.758117	1.01456	1.16646	2.33976	1.32619	1.08868	0.880556	0.824142	0.52778	1.2237	1.34702	1.22062	1.58226	2.03132	3.8371	0.811103	1.1686	0.974054	1.03401	1.33622	0.745024	0.647481	0.266344	0.742678	3.88021	2.38334
FvH4_1g04920			28.9183	24.0275	29.6847	15.5756	11.7126	7.31031	10.1908	12.9504	18.4535	9.17353	12.9407	12.5393	12.5552	6.01508	4.81159	4.66539	3.34846	2.88487	10.0781	3.87403	8.26022	4.53907	4.29918	11.0772	11.3395	8.37974	7.08027	4.60057	5.86431	4.51035	7.31428	13.573	4.83973	17.8212	11.7876	7.40555	9.97527	12.1467	9.58324	7.84331	3.57453	3.68942	3.3449	4.35215	21.8847	9.37361
FvH4_1g05990		RNA-dependent RNA polymerase family protein	17.4378	3.75707	5.24383	1.61528	2.68692	1.44331	0.623586	0.560069	2.73437	0.311199	7.84957	1.25814	3.31776	1.75755	0.62271	0.19446	0.286875	0.262751	0.849607	0.48158	0.627968	0.418035	0.409488	5.27665	0.721117	2.43534	1.18702	0.723172	0.561549	0.55851	0.102941	0.645449	0.0715396	0.136855	0.142318	0.742694	0.393531	0.165789	0.096197	0.123036	0.0770385	0.0392738	0.0720104	0.0627825	2.60998	0.0850297
FvH4_1g07301			2.54349	2.15309	2.32607	0	0	0.109481	0.0388993	0	0.0750616	0	0	0.0475186	0	0	0	0	0	0	0	0	0	0	0	0	0	0	0	0	0	0	0	0	0	0	0	0	0	0	0	0	0	0	0	0	0.187409	0.0511784
FvH4_1g07310			2.10181	1.96949	1.75588	0	0	0	0	0	0	0	0	0	0	0	0	0	0	0	0	0	0	0	0	0	0	0	0	0	0	0	0	0	0	0	0	0	0	0	0	0	0	0	0	0	0.15406	0.0551421
FvH4_1g07850	CHAL,EPFL6	allergen-related	83.2191	16.3923	29.5362	0.4741	0.275855	0.0815209	1.66068	0.707805	5.56044	1.67327	38.0466	13.4098	0	0	0.144313	0	0	9.16995	0.683445	0.195456	0.0951201	0	0	0.554736	0	0	0.208886	0.160471	0.0710801	0.044792	0	0.369956	0	0.0733342	0.0667888	0.461123	0.137891	0	0.146412	0.172731	0	0	0.0392473	0	0.0753847	0.624266
FvH4_1g09716	DXR,PDE129	1-deoxy-D-xylulose 5-phosphate reductoisomerase	12.0253	5.68111	7.88715	1.16365	0.789025	0.944332	1.4935	1.29057	2.33001	0.979129	1.96756	1.72591	2.3241	1.53078	1.40474	0.672867	0.621875	0.0934071	0.740095	0.308433	1.48003	1.70297	0.972959	2.92232	1.33663	1.80172	2.06266	1.55039	1.50197	1.32936	0	2.02827	1.12579	1.07261	1.39629	1.71657	1.61155	1.29002	0.920796	1.91715	1.21205	0.845103	1.2107	1.3502	10.8353	5.27652
FvH4_1g09717	DXR,PDE129	1-deoxy-D-xylulose 5-phosphate reductoisomerase	19.7217	12.1757	13.6077	4.20146	4.56052	4.58208	4.14447	3.80317	5.8672	2.80126	4.35046	3.86191	10.606	3.01419	3.07099	1.24389	2.33735	0.37135	3.28119	0.310386	3.5313	5.02566	3.65386	8.2602	5.90987	8.34634	3.95454	3.90699	2.53425	2.01186	0	7.15849	2.0854	3.71937	2.70891	2.91083	4.9249	2.73809	2.85078	5.67267	2.62231	2.44182	2.75852	4.18614	10.6992	4.75628
FvH4_1g09718		RNA-dependent RNA polymerase family protein	3.64498	1.41131	0.739682	0.401851	0.13208	0.152536	0.243703	0.295973	0.120016	0.230154	0.204655	0.254155	0	0.0678443	0	0	0	0.171072	0.221014	0	0	0.0751655	0.169964	0.143049	0.109817	0	0	0	0	0.0639166	0	0.374915	0	0.292744	0	0.117977	0	0.152288	0	0.150916	0.0392467	0	0	0	0.218705	0.088157
FvH4_1g09730			36.1113	19.515	31.7053	9.51112	7.14402	7.4989	8.95153	9.99384	11.8925	7.24268	10.1543	7.4016	12.3896	3.65897	1.48284	1.13847	1.32008	1.18762	6.47735	2.27328	4.74506	7.1302	4.7355	13.1966	9.7155	10.2111	4.1345	2.78687	3.13626	3.14906	0.433389	8.78705	4.64205	10.3386	8.87211	7.13117	5.5438	4.90326	4.65183	5.38923	2.91385	2.74271	2.94626	5.29356	33.2974	13.9148
FvH4_1g11270	atbzip14,FD,FD-1	Basic-leucine zipper (bZIP) transcription factor family protein	143.149	84.9113	26.097	0.642423	0.0860087	0	2.39283	0.60951	0.77416	0.126856	3.7389	2.56649	0.528021	1.44636	0.244144	0.259026	0.064089	0.0559756	0	0	0	0	0	0.361356	0	0.195095	1.03984	0.846174	0.274801	0.0513352	0	0.0278499	0	0.512747	0.0412304	0.189752	0.225991	0.605641	1.11333	0.0806504	0.231152	0	0.0733001	0.0591496	0	0
FvH4_1g11950	AtGH9B5,GH9B5	glycosyl hydrolase 9B5	9.91519	3.16935	2.45863	0.0857253	0.163263	0.0181528	0.853851	0.13791	4.19799	0.944267	1.90947	1.63823	0.213915	0.234004	0	0	0.030565	0	0.113115	0	0	0	0	0.190495	0.80639	0.0192754	0	0.0497886	0	0.0145084	0	0.039846	0.163356	0.0816491	0	0.913765	0.274483	0.0475289	0.0214257	0	0	0	0.0174789	0	0	0
FvH4_1g13031			2.44203	0.321786	0.327552	0.115858	0	0.0643396	0	0.106506	0.0506227	0.0612581	0.257062	0.520264	0	0.0286168	0.23322	0.223262	0.255283	0.300283	0	0	0.247526	0.23072	0	0.0603382	0.108648	0.147294	0	0.0482935	0.210499	0.120096	0	0.0431684	0.0659547	0.132419	0.0401999	0.28596	0.20665	0.263546	0.101976	0.0997257	0	0.0604246	0.720668	0.364274	0.05729	0
FvH4_1g13192		DNA glycosylase superfamily protein	23.8212	28.8461	22.4998	3.99156	3.13686	5.05617	6.04063	3.39208	4.6316	3.93271	6.33731	5.67469	5.85428	4.79281	3.55935	3.5368	2.67536	3.67773	1.12896	0.620771	2.91025	2.33836	2.60656	3.78015	4.04606	4.67213	2.98008	2.85156	3.87734	3.95434	0.394135	3.67986	3.73072	2.56344	3.46632	2.7936	3.22072	3.21696	2.40372	3.53788	1.98351	3.23501	3.24481	2.79279	9.34774	3.98776
FvH4_1g14240		RING/U-box superfamily protein	2.54636	2.88744	3.99091	1.16929	0.934904	1.4867	1.13351	2.20394	2.05859	0.918764	1.18436	1.08315	1.54026	0.913836	0.833422	0.555347	0.815374	0.427228	0.372378	0.561965	1.46323	0.864176	1.40762	2.04162	1.47004	1.16355	0.968158	0.76938	0.50318	0.817045	0.469847	0.942107	1.19749	1.65119	1.52491	1.51343	1.01189	2.10074	0.737976	0.949706	0.743946	0.823607	0.294114	1.20597	3.51598	1.63421
FvH4_1g14670	REM39,VRN1	AP2/B3-like transcriptional factor family protein	139.94	14.4555	65.1186	2.40941	3.54261	2.37838	2.01664	1.05272	11.0002	0.159548	35.4469	12.2546	3.13717	1.58831	0.282819	0.0611026	0	3.59029	3.82038	1.15546	1.03893	0.1379	0.221117	2.75342	0.129811	6.08868	2.61282	1.98043	1.02879	0.368173	0.158348	0.273981	0.407471	0.679379	0.6585	0.208399	0.0600289	0.107929	0.0988383	0.0874386	0.0185155	0.00311269	0.0382555	0.0232504	0.924221	0.208266
FvH4_1g14680	REM39,VRN1	AP2/B3-like transcriptional factor family protein	12.2172	0.869064	2.47803	0.0422078	0.0217016	0.0193036	0.065127	1.73889	0.340551	0.0261423	0.642626	0.148497	0	0	0.0362793	0.0292135	0	4.88671	3.29645	1.78045	0.482041	0.279217	0.288423	0	0.0609667	0	0.045129	0.048892	0.0444355	0.0212128	0	0.364536	0	0	0	0	0	0.0265701	0.0856867	0.02838	0	0	0	0	0.737914	0.0858927
FvH4_1g15420			2.84139	2.38769	3.82036	1.30054	0.478258	0.217535	0.520461	1.33634	0.896103	0.974891	0.43637	0.42942	0.371737	0.893205	1.16519	1.2079	0.990052	0.287999	0.076281	0.0564157	0.87101	0.988074	0.565624	1.02937	0.741518	0.282537	1.29764	1.4828	1.46818	0.829793	0.0447452	0.785813	0.954182	0.228283	1.61285	1.05739	0.59942	0.499195	0.793315	0.724451	1.15199	1.1767	1.90699	0.923874	2.24368	1.05615
FvH4_1g17210		2-oxoglutarate (2OG) and Fe(II)-dependent oxygenase superfamily protein	35.5872	5.49597	7.39619	2.33705	4.06646	1.7347	6.99915	1.64016	6.25949	1.27535	7.90847	4.28645	1.00882	1.09682	0.524398	0.92671	0.38041	2.00825	3.83867	2.43287	0.61754	3.39112	2.29085	8.72957	0.777358	1.54768	3.37286	3.06738	3.72166	2.2686	0.0265346	0.825634	6.37532	1.04419	6.53304	1.44535	0.73414	0.442565	0.644472	0.818202	0.862682	0.506574	1.28097	0.504734	5.74801	27.7606
FvH4_1g17420		Acyl-CoA N-acyltransferases (NAT) superfamily protein	32.7913	17.8988	6.18228	0.080656	1.02816	10.6742	6.56137	17.1458	0.0442168	0.066608	3.04644	0.954247	0	0	0	0	0	8.95079	3.13011	0.813905	0.45516	0.49604	0.206317	1.18268	0.0181511	0	0	0.019041	0.0175832	0.0196546	1.76959	0.0216355	7.05634	0.614663	2.24166	0	0	0.130431	0.0511092	0.0818852	0.0319931	0.00757102	0.0220124	0	22.7716	10.9843
FvH4_1g18420			3.74069	2.49398	2.95931	0.729578	1.01815	1.79598	0.24578	3.58041	0.762935	0.235562	0.467004	0.224218	0.597128	0.517689	0	0	0.0922348	0.171686	0.57292	0.240999	0.117284	0.703483	1.26971	0.8076	0.243271	0.710209	0.0933749	0.0989314	0.0718692	0.0552289	0	0.60325	0.121365	0.921391	0.9031	0.501092	0.850104	1.19783	1.12964	0.425959	0.237386	0.161008	0.193569	0.269524	2.84031	0.991975
FvH4_1g18650			10.1907	3.24688	5.26512	1.47602	2.61825	0.997862	5.01749	1.23642	4.38307	1.35337	6.24886	5.12667	0.427818	0.629738	0.325155	0.127956	0.0793817	2.02465	1.60256	1.0494	0.58094	1.00243	0.448876	0.524121	0.858758	0.0531473	0.0483215	0.0185609	0.0164429	0.0150721	3.29763	0.903466	0.476026	0.331989	0.853184	0.815393	0.620403	0.412775	0.26274	0.189187	0.0972437	0.0511168	0.11675	0.131621	9.20528	2.6615
FvH4_1g19562			5.81411	7.46458	7.99009	0	0	0	0	0	0	0	0	0	0	0	0	0	0	0	0	0	0	0	0	0	0	0	0	0	0	0	0	0	0	0	0.37572	0	0	0	0	0	0	0	0	0	4.72955	3.43924
FvH4_1g19710	AGL22,SVP	K-box region and MADS-box transcription factor family protein	141.868	142.809	8.87967	0.682036	2.14685	7.71539	11.9839	2.13809	2.83252	1.84638	3.63678	1.47957	0	0.248938	0	0	0	26.0152	25.0477	3.93941	4.85672	3.49674	0.813994	66.0734	0.450858	0.294533	0.380783	0.184519	0.261751	0.024841	7.90558	0.880551	9.50158	1.29116	1.04532	0.0419761	0	0.482618	0.523165	0.609975	0.0457593	0	0.0607024	0.0353307	43.6133	36.0259
FvH4_1g22410	IMS1,IPMS2,MAML-3	2-isopropylmalate synthase 1	5.12779	3.28502	5.12647	2.11971	1.70865	1.07283	2.12579	1.87653	2.8968	1.57977	2.07893	2.17575	2.51118	1.6493	1.17141	0.717643	1.14259	0.157979	1.10929	0.445294	1.37963	1.05612	0.968358	2.30713	1.74764	2.46505	1.60683	1.0676	0.989661	1.00003	0.019189	2.22308	1.50945	1.38507	1.0521	2.41202	1.83786	1.32855	1.64252	1.16245	0.574759	0.70424	0.629103	0.681354	3.96363	3.68753
FvH4_1g22430		GTP-binding protein-related	13.4263	8.87411	12.1817	6.07386	4.73604	4.12743	6.88269	7.48909	8.45328	3.90124	8.15084	6.71795	7.24261	5.4858	3.23021	1.96665	2.31823	1.00384	3.21871	2.09968	3.20837	4.07578	4.82151	7.29912	4.6266	6.37182	5.9799	3.91757	2.67346	3.52207	0.180323	7.11993	2.0389	5.27561	5.19217	4.08131	4.7732	4.14023	4.48106	5.0539	0.628373	0.804899	2.09037	1.64305	7.03503	5.16909
FvH4_1g22471		GTP-binding protein-related	6.90102	5.03364	8.67651	2.08432	2.04112	2.63902	3.64722	2.64935	4.82241	2.02279	3.89693	3.09487	4.32969	2.16299	0.783534	1.05295	1.48813	0.118682	1.9747	0.87096	1.97836	2.22216	1.61134	3.25047	2.93039	4.00304	2.72606	1.49545	0.871228	1.69029	0.144604	3.34884	1.57665	1.61093	1.90764	2.6292	3.15432	3.82773	2.61002	2.39174	1.27905	0.714773	1.80457	1.49675	4.48845	3.17669
FvH4_1g22570	IMS1,IPMS2,MAML-3	2-isopropylmalate synthase 1	44.3349	53.4291	53.861	17.0864	17.8869	13.0662	25.8053	21.3304	23.0633	17.2449	25.4223	26.8938	21.0858	21.0395	22.3071	20.0073	25.1547	17.7425	23.034	12.5592	18.2884	15.0899	12.3143	15.1289	21.7024	21.1971	19.6131	21.2294	21.516	22.2672	0.246569	20.273	12.6328	10.5058	10.3591	22.4789	18.926	16.1619	13.3631	11.7911	13.7613	12.1218	12.3997	13.1002	28.9618	45.9055
FvH4_1g22580		GTP-binding protein-related	41.7657	42.302	47.3689	10.85	13.1309	9.82414	21.8622	8.67206	15.9277	10.8651	20.0854	17.8383	13.9458	15.5633	17.3883	15.3803	17.0949	16.6205	20.195	8.868	14.426	13.6944	9.99534	10.2413	11.945	14.1752	14.7005	14.2093	14.4854	14.2186	0.415308	12.1849	9.60901	7.78241	7.62459	11.9867	9.71785	10.9938	9.93175	10.0094	15.6035	13.3052	11.9379	16.0672	30.5221	30.5363
FvH4_1g23310		Ribosomal protein L13 family protein	233.65	273.88	233.869	53.9549	59.1693	36.37	88.1636	48.0253	69.3485	55.9497	74.2976	80.7295	70.8732	81.3615	68.9994	66.493	57.3644	119.505	97.1172	21.1346	54.3464	38.7468	24.1797	44.8063	48.8902	68.3457	53.8828	45.0764	48.2591	43.6656	0.848835	65.8525	26.4283	27.1973	22.4709	58.6236	61.477	36.5517	26.5694	22.8587	60.4668	53.224	60.6857	61.1629	77.3121	108.228
FvH4_1g23960	PLSP1	plastidic type i signal peptidase 1	2.18363	1.89567	2.53646	0.540408	0.659052	1.21658	0.286295	0.493904	0.833519	0.151643	0.189313	0.433022	0.766707	0.197016	0.128674	0	0	0	0.526147	0.244503	0.0836409	0.334486	0.518489	1.12678	0.217691	0.466494	0.288026	0.113789	0.148951	0.193931	0	0.284069	0.651575	0.25568	0.458265	0.300392	0.274734	0	0.210855	0.274211	0	0.0398425	0.24045	0.0758505	2.86644	2.05684
FvH4_1g24730		Ribosomal protein S8e family protein	86.5097	89.4777	90.0221	13.4874	15.9566	6.5472	18.6293	9.25125	15.8656	7.32567	17.4716	14.6931	15.0186	16.2976	10.2707	10.6908	8.66985	27.0354	18.3401	3.37754	11.0854	6.40533	4.49837	8.60436	9.25103	16.4915	12.2882	9.87509	9.44446	9.66538	0.192141	11.4473	6.36566	3.74817	3.20102	12.1856	10.9872	5.01221	3.50324	4.22312	0.808557	2.12878	7.18341	4.89215	46.8624	46.5421
FvH4_1g24810		Ribosomal protein S8e family protein	101.007	117.127	118.137	23.6187	21.6463	15.4713	24.8708	21.3792	29.2565	15.8139	26.966	27.3037	22.3548	22.8476	23.9962	19.9356	18.1221	23.247	19.8643	3.95059	20.1184	15.6057	11.5638	18.5017	21.5857	22.635	21.1547	19.7752	20.6169	17.6704	0.20282	22.321	10.8823	15.2145	12.9792	19.7057	20.7944	15.8702	15.6637	14.8272	19.0177	15.8253	16.4338	19.2382	49.6679	41.5115
FvH4_1g26750			181.95	178.125	129.45	54.343	43.6159	37.1839	67.5395	64.1996	72.7525	63.053	84.5917	81.5189	113.732	108.443	78.6234	76.0703	84.652	103.663	77.8723	23.6867	43.5998	51.1659	38.5192	100.508	68.9988	115.243	123.568	94.4173	105.948	118.139	11.8969	57.6732	91.4547	42.0724	77.2481	54.7101	49.7327	39.16	42.2163	64.9223	0	25.4992	99.3972	68.4547	141.169	78.8426
FvH4_1g27270		Mitochondrial transcription termination factor family protein	9.83277	10.6097	10.8734	4.3556	4.42994	2.67061	5.09238	3.58139	5.02607	3.56825	5.19376	5.61483	3.46884	3.07975	2.90855	1.95245	2.37401	3.07997	3.58938	2.12966	3.51867	2.64309	1.59941	2.5292	3.64488	2.49293	2.21336	2.58084	1.98516	2.36431	0	3.98583	1.08276	1.19002	1.16574	3.18286	3.04667	2.71909	1.54884	2.00991	1.98744	1.75414	1.41878	1.87113	3.96368	2.38438
FvH4_1g27350		Mitochondrial transcription termination factor family protein	7.51227	8.05977	9.18574	3.49147	3.45456	2.11356	3.046	2.53566	3.70329	2.25936	3.63429	3.43602	2.46092	2.65748	2.82211	2.25699	2.30689	1.97244	2.68019	1.74577	2.44927	1.97613	2.15187	2.46523	2.3587	2.94279	2.15402	2.24466	1.89491	2.25787	0.0196469	2.95134	1.00139	0.803464	0.717907	2.22584	2.27801	2.15439	1.41896	1.48761	1.21556	1.10837	1.43216	1.09147	3.04024	1.99746
FvH4_1g27580			5.84189	7.00802	5.55888	1.60127	1.78904	2.55303	1.16809	4.84487	1.14675	0.979632	1.21813	0.804722	1.87858	0.951939	0.474728	0.716373	0.753986	0.476139	1.76598	2.60224	1.67356	1.6324	1.48312	4.30621	1.91054	1.97944	0.834013	0.521515	0.753727	1.25337	1.87605	1.64258	4.57316	2.08757	1.74536	1.05393	1.18919	1.82123	1.82816	2.32255	1.68189	1.35628	0.891193	1.06422	2.32057	1.30314
FvH4_1g27590		Class I glutamine amidotransferase-like superfamily protein	8.43449	4.94206	6.34624	2.69356	2.31579	1.42857	2.73236	2.73539	2.9472	2.2724	3.23646	3.29071	2.79342	1.70852	1.48578	1.55037	1.42951	0.867428	1.561	0.895831	1.87775	2.35691	1.94512	4.55696	3.13884	3.23859	2.32291	1.20691	0.903735	1.20141	0.0600169	2.80946	2.06432	1.82421	2.84859	2.05557	2.2747	1.94204	1.62122	2.43428	1.23416	1.12449	1.07242	1.35133	5.15727	3.22672
FvH4_1g27660	ATEXP13,ATEXPA13,ATHEXP,ALPHA,1.22,EXP13,EXPA13	expansin A13	9.94761	14.688	13.2131	0.0931868	0.089178	0.0394656	0.436473	0.28649	0.487426	0.224019	0.458016	0.534384	0.155874	0.268418	0.196199	0.238905	0.241544	0.318304	0.320903	0.0497084	0.138148	0.443348	0.349716	0.418677	0.605602	0.153131	0.266714	0.191631	0.341364	0.406099	0.116115	0.797889	0	0.12044	0.161668	0.453241	0.13216	0.16031	0.246065	0.298656	0.201591	0.326867	0.526938	0.429658	4.67589	3.8344
FvH4_1g27740	ATEXP13,ATEXPA13,ATHEXP,ALPHA,1.22,EXP13,EXPA13	expansin A13	9.05117	9.25699	7.36693	0.765848	1.57241	1.93524	2.33875	1.65058	2.7122	2.20333	3.2027	3.62625	1.97825	2.09302	1.94553	2.56742	2.92689	4.22259	4.67579	1.5655	1.89022	1.74929	2.51515	1.94117	2.40572	1.34799	1.52817	1.66961	2.74745	2.14423	3.42258	2.78708	0.928542	1.27911	1.22292	1.93187	2.18107	2.51663	1.73979	1.91467	5.43483	4.64943	2.92445	4.58404	3.32965	3.28636
FvH4_1g27780		Glutaredoxin family protein	17.6663	10.906	10.6246	0.33425	0.217557	0	1.84705	1.1586	2.61539	1.52689	4.05533	4.46784	1.72598	0.294603	0.0856438	0	0	2.53386	2.77938	0.365612	0.23797	0.489623	0.0820943	1.80389	3.29505	1.09076	0.0681616	0.0749181	0.0691825	0	0	1.51709	0	0.295284	0	2.63984	0.738147	0.133182	0.173779	0.0627643	0.065289	0	0	0	1.16935	0.40898
FvH4_1g27850		Zn-dependent exopeptidases superfamily protein	4.30925	2.63465	4.49885	1.75754	1.96585	1.14352	2.0287	1.96948	2.64974	1.47738	2.59974	1.9091	1.52904	1.09425	0.974948	0.798821	0.678689	0.275034	1.20275	0.648874	1.26022	1.32852	0.883504	2.61061	1.33613	1.63776	1.2434	0.909494	0.77386	1.1671	0	1.5362	0.499873	1.08244	1.41909	1.47928	1.14133	1.21311	1.38831	1.80193	0.982846	0.78829	0.856511	0.876051	3.64709	2.24728
FvH4_1g28432			10.6341	8.77001	9.60236	1.03609	1.25452	0.920321	0.986818	1.44028	2.74556	0.850211	1.46152	1.36629	1.30189	1.00834	1.16772	1.31758	0.77099	0.560414	1.03489	1.02068	1.09768	2.09991	1.34935	1.21793	0.547429	1.0174	1.68684	1.45168	1.20809	0.843414	0.0660667	0.539274	0.96087	0.112354	1.15498	0.898239	0.94025	1.66541	1.17489	2.13932	1.35604	1.1661	1.51811	1.55852	6.07952	4.19429
FvH4_1g28523			23.8877	12.425	23.2226	7.42551	7.62986	6.9026	13.2685	14.3921	12.3845	6.64615	15.2096	11.1208	11.5635	6.48451	4.24223	4.00615	2.40161	0.384428	8.80502	4.00798	6.27686	5.82067	6.01493	20.2271	7.84812	8.19292	6.70007	6.42859	3.90136	5.84046	1.59898	7.48413	9.4141	7.25681	5.715	7.23194	7.14773	8.29207	7.38311	6.97827	3.2213	2.71041	2.81044	4.59542	20.9746	7.78359
FvH4_1g28790	AKINBETA1	5'-AMP-activated protein kinase beta-2 subunit protein	94.1513	83.3865	72.5781	43.9	49.3443	52.783	40.539	37.0614	52.0211	32.4171	43.8665	43.3104	31.2846	31.0834	30.3788	35.2834	30.1979	53.4248	44.6871	25.9887	34.2069	32.661	39.3815	38.4588	36.1773	24.2853	33.54	30.2909	31.6543	27.6494	5.11216	45.0731	29.8536	38.6329	31.1744	30.4599	49.6212	59.7232	59.1862	44.191	30.3011	26.1928	28.1529	34.2307	41.5822	29.6458
FvH4_2g00021			15.6098	12.3679	14.0061	6.15741	3.68352	1.74267	4.13887	3.73019	6.42704	4.44342	7.30511	5.9585	8.80992	6.06772	6.68816	4.19856	3.35161	3.51558	6.38866	2.60976	12.5351	8.13008	6.94465	10.2656	6.56035	4.96477	5.2162	4.18798	3.39362	4.26175	0	6.29019	0.978407	2.84035	5.1904	4.14491	4.29204	3.10225	3.414	3.52769	4.9382	3.98555	4.25058	4.78902	6.22491	4.23411
FvH4_2g00660			27.9917	36.543	39.8502	25.9634	18.0618	15.1543	20.2934	23.2616	17.7453	15.5957	18.1788	19.799	15.7712	10.3312	5.20112	5.7659	6.10186	10.2676	12.1995	6.30194	16.0196	13.767	12.3088	18.1395	15.4236	16.7602	10.7108	7.289	7.11356	7.79038	8.78318	20.7484	13.9122	16.0702	28.491	10.1296	10.2413	10.3292	10.9891	13.4524	9.17168	9.16007	7.33554	9.61462	26.0907	20.4736
FvH4_2g00814			4.00479	5.75514	5.29909	0	0	0.852532	0.0373916	0	0	0	0	0.0456768	0	0	0	0	0	0	0	0	0	0	0	0.0986927	0	0.0704825	0.0565372	0	0	0	2.48804	0	0	0.057576	0.0657533	0	0.0665035	0	0	0	0	0.0321392	0	0	0.094338	0.122743
FvH4_2g02431	ADL6,DRP2A	dynamin-like protein 6	12.7026	3.69898	8.65639	3.7986	2.37551	2.51769	1.86979	4.22263	3.53758	1.49115	2.35309	1.42014	3.5328	0.979137	0.293874	0.210309	0.50393	0.0677535	1.71812	0.727755	2.37272	2.8219	1.90708	5.73472	2.24892	3.71577	1.48378	0.859451	0.516042	1.10366	0.120268	2.95217	1.63571	2.91434	3.44945	2.08061	2.95767	3.04542	2.17502	1.77536	0.735914	0.610881	0.562168	0.598082	15.2804	8.38955
FvH4_2g03361	ATPRP40A,PRP40A	pre-mRNA-processing protein 40A	5.5558	2.21127	4.47585	0	0	0	0	0.112364	0	0.0377913	0	0	0	0	0	0	0	0	0	0	0	0.371563	0	0	0	0	0	0	0	0	0	0	0	0	0	0.105	0	0	0	0	0	0.0414596	0	0	0.328223	0.106723
FvH4_2g04502			215.543	28.4927	18.8574	0.0633613	0	0.0349179	2.16083	0.240429	6.85668	3.93656	11.8464	10.9314	1.37969	1.11511	0.0675304	0.0395454	0.0454172	25.7565	40.7875	36.0837	0.128817	0.357192	1.47795	1.06346	0.558599	0.37579	0.506017	0.0822529	0.0374496	0	0	0.0716289	0.773621	0.182106	0	2.69587	0.218798	0.0457122	0.479777	1.07131	0	0.013983	0.0336216	0	0.285367	0.109631
FvH4_2g04730	ATHS83,AtHsp90-1,ATHSP90.1,HSP81-1,HSP81.1,HSP83,HSP90.1	heat shock protein 90.1	38.1927	16.9705	28.7925	12.1225	7.29546	8.39813	13.6918	9.23843	14.3984	9.05445	17.5951	14.7393	25.1717	9.98583	3.25866	3.80032	6.90861	5.55313	10.4714	1.06048	7.39048	5.858	2.56867	26.3432	10.8303	21.9477	9.67545	5.463	4.24536	7.33349	0	12.638	10.9677	3.77419	6.17029	9.7646	11.4758	5.96141	5.97694	6.52896	8.3704	6.67397	6.2092	11.0645	23.4269	13.8201
FvH4_2g05080		NADH dehydrogenase subunit 7	16.2804	13.142	3.81522	0.139737	0	0	0	0	0.0879126	0	0	0	0.127242	0	0	0	0	0	0.0345305	0	0	0	0	0.104785	0	0	0.0395787	0.0329886	0	0	0.04051	0	0	0	0	0	0.0353043	0.0557764	0	0.0313192	0	0	0	0.0162658	1.1358	0.114083
FvH4_2g05412			2.56425	2.64964	2.64768	0.848615	0.825684	0.322116	1.01611	0.665316	0.746173	0.792759	0.826751	1.15765	1.24047	0.741706	0.853135	0.430107	1.22672	0.645275	0.384615	0.404172	1.07656	0.613503	0.572184	1.14237	0.854394	1.12349	1.57213	1.07681	1.03088	1.55552	0	1.21339	0.310788	0.889973	1.19302	0.43554	0.2747	0.59833	0.590662	0.610981	1.53967	1.49543	1.58827	1.57645	0.447553	0.303607
FvH4_2g07130	ATUBC7,UBC7	ubiquitin carrier protein 7	3.37374	3.0367	2.65061	0	0	0.64646	0	0	0	0.397728	0	0	0.486798	0	0	0.185291	0	0	0	0	0	0	0	0	0	0	0	0	0	0	0	0	0	0	0.267016	0.25	0	0	0	0	0	0	0	0	3.82479	0.738232
FvH4_2g07371			803.285	695.901	400.542	46.3034	79.2873	49.1492	60.6891	122.756	81.4022	118.876	92.9927	98.1502	60.099	71.6116	86.6128	149.226	76.7229	74.6589	54.5928	12.3149	56.7053	72.5986	44.0557	84.97	107.174	51.0036	99.7632	135.631	214.383	191.695	6.43104	78.1255	39.7322	27.1928	33.2013	92.8333	86.8359	107.951	105.825	67.5483	101.48	105.778	144.864	121.528	451.455	81.0759
FvH4_2g07390			590.864	542.686	405.757	69.6125	121.053	68.3243	79.7116	156.365	100.968	149.656	119.264	131.688	90.9508	106.297	112.384	191.922	104.024	97.7145	88.835	29.5263	80.4539	120.113	74.839	120.202	155.89	76.8974	160.26	159.657	277.631	253.324	7.80381	120.917	57.6904	46.2787	91.6274	132.36	136.59	131.979	137.251	101.434	140.797	148.569	205.146	169.882	506.651	107.178
FvH4_2g08820			92.3389	84.3497	70.8344	35.935	38.8199	35.0667	44.063	38.3108	52.246	48.4287	47.1304	49.0899	44.1578	37.8859	41.3825	40.9141	42.2922	66.0906	53.9929	32.9056	48.5368	54.5311	47.5406	44.7243	47.6559	36.2956	42.1742	44.8533	41.2903	41.9354	14.4422	43.8659	40.7994	46.3694	47.547	32.444	38.5955	40.5143	39.5057	44.0072	57.4134	61.6222	59.6469	53.9735	63.9752	49.9581
FvH4_2g08910	ATRL2,MEE3,RSM1	Homeodomain-like superfamily protein	728.177	12.2884	19.5321	13.7153	5.03478	0.929924	13.3324	29.8	36.402	344.664	2.42326	5.64265	107.691	0.728977	1.77815	0.352297	0.626307	0	0.0753675	0	0.108505	0.0600874	0	26.4181	38.7025	481.288	1.19428	2.38826	0.376227	0.761786	0	0.939617	0.6864	7.72159	0.0761872	68.6595	3.14908	0.365218	0	0	0.156869	0.0372391	0.0416193	0	0.461844	0.320608
FvH4_2g10342			4.13187	3.19587	5.65271	0.960782	0.586984	0.441966	0.3901	1.57173	0.287612	0.217504	0.78913	0.516926	0.589567	0.697272	0.0740567	0.33667	0.188117	0	0.645223	0.089291	0.549557	0.617541	0.860105	1.14799	0.681425	0.801595	0.572558	0.392939	0.31303	0.346005	0	0.512541	0.670269	0.642893	0.686813	0.213849	0.311144	0.292525	0.397509	0.599091	0.305073	0.119308	0.245966	0.115079	3.76934	1.81653
FvH4_2g11430	ALDH6B2	aldehyde dehydrogenase 6B2	1.87509	1.21634	2.01758	0	0.158853	0	0.130365	0	0.251558	0.153208	0.0802313	0	0.276291	0.294587	0	0	0.246166	0	0.113391	0	0	0.0904017	0	0	0.235342	0.368604	0.129968	0.137702	0.100034	0	0	0.123088	0.356986	0	0	0.271791	0.241438	0	0	0	0	0.155126	0.0673568	0.109334	0.106035	0.0426668
FvH4_2g12150			31.7408	29.2034	22.0924	11.2165	9.91458	11.1693	9.11091	10.1932	16.2731	8.90637	12.7794	11.0887	11.8805	10.0069	14.0106	10.2783	7.29906	4.66024	6.90856	11.4916	9.11452	13.9334	11.5125	12.8269	8.07073	11.2751	12.7253	13.1378	10.0037	14.4555	0.25112	11.0527	5.9174	21.1405	12.4001	5.96631	11.4448	9.92892	11.7796	14.6487	10.9996	9.43389	14.4504	12.7623	16.3754	6.909
FvH4_2g12940	KCS1	3-ketoacyl-CoA synthase 1	43.6312	65.9584	23.1394	1.20455	1.77273	0.0293211	8.10817	1.3682	3.44759	10.0649	18.5765	16.0821	0	0	0	0	0	4.10761	0.193706	0	0.912417	0.207852	0.0895876	5.00612	4.69719	0.0237439	0	0	0	0	0.0212612	1.58841	8.65209	0.0521988	0.01832	0.254887	0.0378232	0.060052	0.092946	0.0454473	0	0	0	0	0	0
FvH4_2g15050	ARPN	plantacyanin	690.418	120.37	289.945	30.3702	7.78169	0.399064	40.8857	45.6055	122.954	63.257	132.308	90.724	102.789	17.0828	2.21841	0.183207	0	10.4991	214.461	24.5471	3.51685	3.51866	1.56306	103.691	30.7878	8.6538	0.733217	0.443689	0.256714	0	0	13.6147	17.6993	3.09743	0.658222	57.0679	70.1922	39.4354	39.4704	10.5595	0.163732	0	0.0778813	0.221231	22.7664	0.0952178
FvH4_2g15802			2.02133	2.94076	1.53653	0.215595	0.78257	0.850193	0.0459383	2.0403	0.177288	0.169525	0.115007	0.0515959	0.486	0.230025	0.196074	0.224325	0.0830106	0.505248	0.614412	0	0.242503	0.591061	0.083658	0.693582	0	0.660469	0.461033	0.291141	0.257919	0.18716	0	0.0867479	0.965907	0.654589	0.77638	0.1	0.25186	0.264801	0.758985	0.409324	0.308848	0.130554	0.094941	0.306451	0.33021	0
FvH4_2g17651	emb2734	ARM repeat superfamily protein	13.1569	8.78122	14.6944	5.72498	5.47883	5.16729	7.3064	4.81429	7.93773	4.33591	8.57253	8.43092	7.77618	4.46383	1.97977	2.1239	1.9302	1.3456	4.08654	2.93598	4.01926	5.17934	5.69824	7.10506	5.20721	5.03691	3.30186	2.46542	4.10933	3.42074	0.112219	5.63919	2.83774	3.91379	6.34087	4.14389	3.64836	3.63121	3.27621	5.72677	3.93386	3.94902	3.74425	5.30492	12.4093	6.4176
FvH4_2g19101			36.4307	25.2756	33.8926	10.865	9.67843	11.1789	13.2777	13.7456	15.8862	10.5832	20.6919	13.0109	22.0347	11.6789	6.78858	7.572	6.23416	4.51799	11.0459	5.92409	9.2642	10.7253	6.38586	21.6953	12.6586	16.7594	10.9275	6.89994	8.07321	9.02341	2.45622	9.68757	9.71718	11.7862	8.99206	9.35379	10.9558	9.84533	9.62948	11.8949	8.8686	5.58554	6.44183	9.35244	27.3075	22.1636
FvH4_2g19480	KAT1,PKT4	peroxisomal 3-ketoacyl-CoA thiolase 4	2.43347	1.6858	1.24722	0	0	0	0.0524295	0.122135	0.20234	0.111325	0	0.0640468	0.112028	0.065632	0.11189	0	0	0	0	0	0	0	0	0.138384	0.56789	0	0	0.0871331	0	0	0	0	0	0	0	0.208968	0	0	0	0	0	0	0	0	0.194569	0.135047
FvH4_2g19660		PQ-loop repeat family protein / transmembrane family protein	16.3273	9.31829	13.7352	3.05575	1.64582	3.57711	4.35005	3.40781	3.45708	2.79666	4.64006	3.4126	5.90611	0.812346	0.46487	0.366413	0.86614	1.58102	1.8398	0.989292	1.71913	3.84358	2.5543	6.1245	3.457	5.16348	1.28985	0.853415	1.81112	1.66458	1.28856	2.08546	2.99997	2.52733	1.54326	2.84219	2.20562	1.96042	2.59829	2.23849	1.76178	0.832041	1.05745	0.815917	9.23506	3.66972
FvH4_2g21310	LSH3	Protein of unknown function (DUF640)	327.026	40.9766	1.88098	1.55483	0.820708	0.622522	5.42844	1.50634	2.19185	0.660305	5.88264	6.33051	0.335564	0.481116	1.04299	0.620639	1.32124	0.082634	3.98267	1.07333	0	0.142367	0.0706861	0.907491	0	0.230203	0.486496	2.36626	1.99276	1.83904	0.0459997	0	0.74728	0.608743	0	0.237033	0.0818325	0	0	0.2364	0.226162	0.524545	0.209624	0.149061	0.840687	0.214224
FvH4_2g22412	MAP65-5	microtubule-associated protein 65-5	8.32045	5.18962	6.98061	3.71764	1.68237	0.881982	2.33769	4.21721	3.46212	2.48287	4.35688	2.84334	3.47805	2.4059	1.66522	2.78981	2.89805	0.613965	0.317838	0.380868	0.3858	0.571522	0.476884	5.85146	1.58321	2.19604	2.91138	2.55986	2.7889	3.6475	0	1.65401	2.40154	0.958323	0.383397	2.04015	2.26072	1.15586	1.18934	2.05535	2.98217	1.53395	1.62161	2.21894	10.6956	3.05012
FvH4_2g24370	ATGID1B,GID1B	alpha/beta-Hydrolases superfamily protein	138.673	445.741	317.057	77.0213	34.8816	69.8931	100.498	115.204	135.728	171.816	207.213	168.668	46.3116	89.0047	18.0023	14.5776	19.1045	29.7426	35.0079	24.7858	9.55107	14.7581	16.9973	83.026	71.8582	26.8436	78.9503	18.6307	13.5808	15.678	0.966922	35.2333	149.739	192.676	339.324	120.389	68.112	37.9481	34.0819	26.4855	11.6156	7.19531	9.31897	11.8757	175.616	224.232
FvH4_2g24860		RING/U-box superfamily protein	11.5979	8.13183	9.36319	1.91653	2.28509	2.66913	2.16072	1.26545	2.78045	1.72183	2.41604	2.91112	0.812892	1.33351	2.00112	1.32067	0.464171	1.57378	1.24288	0.220322	2.43978	1.99877	2.90192	1.39523	2.06623	1.01903	1.82748	1.53876	1.29801	2.13899	0.0873722	4.11903	0.110952	1.40424	1.19952	1.95577	1.6179	0.866829	0.898317	0.89804	1.29741	1.41494	1.11911	1.31369	0.279914	0.122049
FvH4_2g25080		Mitochondrial transcription termination factor family protein	29.7894	27.1313	26.9656	8.14254	6.40942	6.52907	7.49512	7.62057	7.67643	6.80603	6.6196	7.83505	7.97757	7.1803	7.42456	8.69334	8.0067	10.8227	9.35656	4.10743	7.6648	7.25118	7.66735	5.82983	7.15697	7.652	5.41867	6.42484	7.1081	9.27689	5.05818	8.90145	8.62685	6.91611	9.81684	6.79872	5.53936	7.3486	5.46933	7.63844	8.24885	7.77965	6.07939	8.54259	17.9045	13.4583
FvH4_2g27840	SDG20,SUVR3	SET domain protein 20	15.6693	19.7925	19.47	9.40963	8.52787	6.4992	7.969	10.5356	10.8816	8.15479	9.94004	12.065	13.5074	9.17488	9.49623	7.32938	5.55187	9.55328	6.12821	2.00437	6.40818	6.63342	4.29273	7.78232	10.5913	8.10125	7.86963	5.77752	5.15876	4.31864	1.11496	7.56421	6.18554	4.43598	5.13795	6.93486	6.84283	6.65543	7.69874	6.16236	6.10849	4.40372	6.64518	5.58857	10.9305	5.15299
FvH4_2g33550	CLE26	CLAVATA3/ESR-RELATED 26	29.4647	7.54507	7.73295	0	0	0.11014	0.269312	0.119536	1.07786	0.258115	5.79808	0.664274	0	0	0	0	0	16.5692	4.23494	0.548212	0.399394	0.446726	0.95001	0	0.207951	0.116951	0	0.0852792	0	0	0	0.435559	0	0	0	0	0	0.1516	0.129998	0	0	0	0	0	2.14463	1.16808
FvH4_2g34710	SDH5	succinate dehydrogenase 5	1.94547	4.27321	3.85459	0.234416	0.103922	0	0.0430671	1.2072	0.0953695	0.260156	0.05301	0.100981	0.182549	0	0.0818204	0.140821	0	0.15789	0.175627	0	0	0	0.0784293	0	0	0.0811807	0.322733	0.0715736	0	0.101582	0	0	0	0	0	0.273326	0.386152	0	0	0.0679514	0.0311871	0	0	0	0.138774	0.248085
FvH4_2g37180			2.25823	2.4407	4.04079	0	0.0831377	0	0	0	0	0	0	0	0	0	0	0.0555874	0	0	0	0	0	0.0477838	0	0	0	0	0	0	0.117355	0	0	0	0	0	0.201279	0	0	0.101789	0	0	0	0	0	0	0.931333	0.122348
FvH4_2g40204			11.8588	14.1941	11.9479	0	0.262858	0	0	0	0	0.115077	0.0689731	0.0662057	0.229725	0	0	0.0874409	0.204677	0	0	0	0.135733	0.321492	0	0	0.109817	0.123521	0.271957	0	0	0.0639166	0.121045	0.102343	0	0.104645	0	0.108006	0.100373	0.160117	0.104463	0	0	0	0	0	0.0847119	0.190333
FvH4_2g41250	AtMAPR2,MAPR2	membrane-associated progesterone binding protein 2	22.2903	38.6955	22.7554	4.24467	3.16308	2.89098	5.34527	3.27671	3.69799	8.85719	4.76044	3.55345	5.64766	2.95116	4.45719	3.9613	5.88889	1.1615	2.37565	3.92219	3.45263	6.96852	3.92109	5.72582	8.55504	6.74092	5.28967	6.96599	5.18062	5.70693	0.485105	7.67292	6.1991	6.82668	9.93214	2.79765	3.31307	4.54671	4.30962	5.24063	5.5461	7.25304	6.21277	5.60961	14.2312	6.97517
FvH4_3g02670	ATGA2OX8,GA2OX8	gibberellin 2-oxidase 8	3.75788	4.06745	0.310678	0	0	0	0.0412266	0.236164	0	0.128886	0.0851484	0	0	0	0	0	0	0	0.095623	0	0	0	0	0.0725434	0.0278453	0	0.0274006	0	0	0	0	0	1.25594	0	0	0.0273861	0	0.834724	1.90718	2.65939	0.028422	0	0	0.0225219	0.171823	0.0361602
FvH4_3g03322	B120	S-locus lectin protein kinase family protein	11.351	8.01712	13.9665	3.07075	1.32312	4.06338	2.1262	4.0421	3.63187	2.14065	2.69903	2.36973	3.19126	2.67351	1.65207	1.77376	1.47184	0.166827	2.22164	0.72626	2.2759	2.19443	2.09001	4.85408	1.93131	2.01262	2.85276	1.60093	2.18529	2.77116	0.972499	3.31973	0.956795	3.06966	3.69598	1.87229	2.39052	3.39679	2.33059	3.75899	1.34606	1.18221	0.742435	0.565456	15.457	11.8413
FvH4_3g03540	ANAC098,ATCUC2,CUC2	NAC (No Apical Meristem) domain transcriptional regulator superfamily protein	0.0166104	4.98626	38.1556	0.0388381	0	0	0	0	0	0	1.9754	0	0.0304928	0	0	0	0	0.382183	0	0	0	0	0	0	0	0	0.0215778	0	0	0	0	0	0	0	0	0	0	0	0	0	0.0295152	0	0	0	0	0
FvH4_3g03990	UFO	F-box family protein	0.0915139	20.5201	34.4413	0	0	0	0.21117	0.0273392	0.0519775	0	3.14701	0.161643	0.0501537	0.0236572	0.0473425	0.057057	0	0	0.0204158	0	0	0	0	0	0	0.0221222	0.0177452	0.132892	0.409409	0.208877	0	0	0	0	0	0	0	0	0	0	0.118982	0	0.024255	0.0295282	0	0
FvH4_3g04000		SGNH hydrolase-type esterase superfamily protein	1.3108	12.0233	20.5109	0.14902	0.048497	0.0565653	0	0.156575	0.0445058	0.0269281	0.730835	0	0.128134	0.0754768	0.0428912	0.064852	0.112218	0	0.0699243	0	0	0	0.0630284	0.366384	0	0.310996	0.281849	0.276265	0.167758	0.280125	0	0	0	0	0	0.0838022	0	0	0	0.0596931	0.247418	0.0172748	0.0623051	0.11799	0.124927	0.0700568
FvH4_3g04170	LFY,LFY3	floral meristem identity control protein LEAFY (LFY)	3.64305	9.68938	14.2375	0.441036	0.0299981	0	2.52171	1.42189	0.151014	0	1.45967	0.396573	0.0261313	0.0155622	0	0	0.0224642	0.300028	0.267664	0	0	0.0392611	0	0	0	0.0234336	0	0	0	0	0	0.0195236	0.0322179	0	0	0.0247746	0.0230237	0	0	0	0.00900247	0	0	0	0	0
FvH4_3g04190		Ribosomal protein L11 family protein	0.61447	15.9482	7.94219	0.819317	0.429861	0.254065	2.17452	2.49301	0.4821	0.267798	1.04212	1.21399	0.315124	0.290085	0	0.192248	0.0534731	0.38871	0.395787	0	0.320417	0.0820825	0.0928026	0.546745	0.0599613	0.190669	0.162752	0.0491794	0.0553814	0	0	0.102354	0.0766905	0.0571377	0.0520379	0.311197	0.10961	0.0831513	0.114076	0.0878917	0.0642876	0.160405	0.122317	0.146064	0.391997	0.403674
FvH4_3g04232		Protein of unknown function (DUF300)	4.47963	3.09879	3.59124	0.267169	0.510087	0.335701	0.342298	0.0614012	0.480273	0.542308	0.130874	0.464817	0.221616	0.225386	0.275079	0.215463	0.250999	0.0831987	0.414167	0	0.344294	0.552304	0.130661	0	0.464177	0.219515	0.30263	0.62885	0.39463	0.152603	0.058869	0.314898	0.068309	0.193266	0.215266	0.109905	0.142574	0.0778712	0.301933	0.266667	0.419847	0.479045	0.496421	0.392836	0.986939	0.888989
FvH4_3g04270	BUM,BUM1,SHL,STM,WAM,WAM1	KNOX/ELK homeobox transcription factor	1.75734	4.31944	4.43159	0	0.118466	0.105376	0.0245472	0	0.108716	0.0384644	0.23276	0.0149932	0.0778231	0.0153642	0.0233178	0.0198021	0.0241735	0	0	0	0.0340523	0	0	0	0	0	0.0430303	0	0	0	0	0	0	0.037798	0	0	0	0	0	0	0	0	0	0	0	0
FvH4_3g04400	PGA6,WUS,WUS1	Homeodomain-like superfamily protein	0.283377	9.14845	56.7421	0	0.0658996	0	1.23544	0.0316519	0.0300884	0.238362	2.19149	0.0165981	0	0	0	0	0	0.228291	0.0472728	0	0	0	0.527848	0	0.521611	0	0	0	0	0	0	0.098312	0	0	0	0.0270775	0	0.0381793	0	0	0	0	0	0	0	0
FvH4_3g05061			3.39293	2.50637	3.92108	1.31662	1.07079	2.92597	0.672807	2.3824	1.42161	0.866722	0.351369	0.434011	1.53202	1.38337	0.0857824	0.130568	0.600676	0.274242	1.16922	0.424194	0.525049	0.628674	1.60224	1.62825	1.42313	2.22003	0.364665	0.709903	0.513046	0.538699	0.179551	1.13704	1.08891	1.13177	1.24244	0.932917	1.09894	0.813856	0.721643	1.26474	0.0997832	0.156772	0	0	3.48788	2.02532
FvH4_3g05530	ATGA2OX2,GA2OX2	gibberellin 2-oxidase	104.831	126.227	46.5959	5.92959	20.2246	49.7569	13.6609	3.69831	0.628918	0.735565	39.1355	5.17411	6.02639	3.65645	5.83523	2.73417	0.298462	13.0942	13.0086	1.95292	0.14725	0.840194	10.9413	1.59179	0.213036	2.79071	2.33685	2.27387	1.46045	2.26502	0.0292105	0.292489	2.94168	0.259573	0.0503393	0.0285238	0.0763705	0	0.245152	0.322818	0.507839	0.643501	0.567462	1.38806	0.087145	4.07841
FvH4_3g06360	ATHB40,HB-5,HB40	homeobox protein 40	2.53412	36.4767	4.19309	0	0	0	0.186788	0	0.305885	0.290816	0.54663	0.178042	0	0.22199	0	0	0	0	0	0	0	0	0	0	0	0	0.635152	0	0	0	0	0	0	0	0	0	0	0	0	0	0	0	0	0	0	0
FvH4_3g09870	FT	PEBP (phosphatidylethanolamine-binding protein) family protein	42.1646	59.8793	28.9576	0.291717	0.0646626	0	0.147295	0.187274	2.64402	0.0568992	1.44518	2.11195	1.64747	1.0394	0.311741	0.262865	0.0484228	0	0	0	0	0	0	0.0707298	0	39.679	33.8414	12.9022	9.93301	1.60032	0	0	0	0	0	0	0.0953217	0	0	0	0.0194053	0	0.0276911	0.0449485	0	0
FvH4_3g11120	LSH6	Protein of unknown function (DUF640)	933.123	194.689	100.38	11.3338	13.3333	4.91885	33.4348	7.5906	8.11879	19.6404	109.036	41.7896	13.2984	35.6379	5.13039	2.28196	2.1585	16.4281	15.4922	4.77586	7.53577	3.47765	0.756284	69.5681	60.7059	8.86142	33.0979	8.3675	7.82169	7.3803	0.12506	24.9416	17.6467	0.941728	2.94185	2.81101	1.29426	0.713086	0.711197	1.72657	6.88372	4.79856	2.99218	7.80314	27.6598	16.5966
FvH4_3g11290	AGL6	AGAMOUS-like 6	9.85288	61.931	37.8505	3.81377	1.72444	0.319312	4.95565	11.9066	3.57613	2.19122	14.9252	5.66138	7.40594	3.61381	4.89836	2.6449	1.47387	0	0	0	0.202544	0.21844	0.0717068	0.906288	0.110975	18.0651	10.1289	7.72505	5.11501	2.50134	0	0	0.164626	0	1.30979	0.613878	0.679765	2.1066	2.33002	0.727263	0.336011	0.456901	0.202013	0.377118	0.100023	0.0389179
FvH4_3g11720	ATGID1B,GID1B	alpha/beta-Hydrolases superfamily protein	13.3505	129.774	156.645	6.51712	3.88863	0.721507	15.1623	6.10755	10.645	2.34067	58.1042	17.2598	0.475636	0.826751	0.0264852	0.044984	0	3.59297	1.41967	0.0735596	4.81462	1.57541	0.170657	1.12942	0.223418	2.22242	3.63183	0.0463367	0.159153	0.185339	0.297933	0.2192	0.0361287	5.30585	5.77204	0.694979	0.0495893	0.362621	0.292516	0.0853973	0.0201905	0	0	0	0.105281	1.42295
FvH4_3g12221	FLO10,FON1,SUP	C2H2 and C2HC zinc fingers superfamily protein	0.0820874	9.49816	17.4961	0	0	0	0.18202	0	0.0503839	0.0914538	3.42811	0.0789031	0.0964412	0.561465	0.178234	0.221231	0.0859259	0	0.0395798	0	0	0	0	0.17456	0	0	0	0	0	0	0	0	0.124608	0	0	0	0.0421377	0	0	0	0.0823811	0.0195564	0.0235113	0.0190819	0.0133383	0.0150414
FvH4_3g12620			119.713	54.4487	46.4027	5.86725	2.14026	3.85482	32.626	9.41199	3.37511	10.9574	3.97333	2.84819	10.2294	6.60049	32.4745	22.757	11.328	7.55479	3.35918	1.11847	27.4537	10.4043	2.53671	1.57899	10.5651	5.24544	22.0091	48.5608	47.0524	25.7675	0.171001	12.8918	5.07676	11.5834	1.5393	3.71241	3.9653	2.86868	0.877044	0.113701	11.5994	3.27257	14.4729	5.76731	9.67132	7.07239
FvH4_3g12960	UFO	F-box family protein	9.51767	159.32	54.3901	0	0.0525475	0.0233706	0.732146	0.0848261	0.402997	1.04309	30.7374	2.16219	0.138457	0.227101	0.020686	0.0356025	0	1.76623	0.19003	0	0	0.0302019	0.0198286	0	0.0786243	0.111204	0.146725	0.0180954	0.01671	0	0	0	0.059632	2.13218	0	0	0.0201652	0	0.0485711	0	0.00788479	0.00719503	0	0	0	0
FvH4_3g15720		disease resistance protein (TIR-NBS-LRR class), putative	3.71341	2.1798	1.40395	0.449569	0.277861	0.161654	0.575477	0.189119	0.743789	0.85661	0.255255	0.355941	1.1317	0.811183	0.470504	0.286783	0.341231	0.0150448	0.00829142	0	0.0874196	0.0962094	0.0622022	1.69673	1.15545	1.08034	0.762737	0.455531	0.256366	0.659727	0	0.382296	0.467069	0.345523	0.487145	3.04687	0.924565	0.450229	0.480359	0.650313	0.152326	0.157858	0.0577171	0.0792146	2.21081	1.76472
FvH4_3g15730		S-locus lectin protein kinase family protein	4.57818	1.92752	1.80396	0	0	0	0	0	0	0	0	0	0	0	0	0.0367087	0	0	0	0	0	0	0	0	0	0	0	0	0	0	0	0	0	0	0	0	0	0	0	0	0	0	0	0	2.48704	1.90098
FvH4_3g16461			32.9665	41.9705	40.2244	11.2192	15.7514	11.5249	14.2447	17.1737	18.6372	15.445	19.8114	20.607	15.3417	19.4862	20.5007	20.1925	24.5722	11.0327	8.80177	8.62687	11.9737	14.0346	9.04645	15.3066	12.6264	15.4399	21.8461	25.5378	24.7186	23.0996	5.97698	10.9271	15.6306	8.72858	5.23293	11.9712	16.5868	14.9357	14.6987	14.4297	13.2662	11.4099	11.7538	9.15085	12.0395	4.66054
FvH4_3g16470	PYL8,RCAR3	regulatory components of ABA receptor 3	71.5734	88.3084	68.2392	22.9354	35.0962	19.7529	23.2229	32.2039	30.4639	24.2229	32.4699	31.2892	30.8076	35.6342	33.3174	30.7054	34.0581	27.0613	19.9269	16.8616	18.797	24.6808	14.3955	33.1763	21.5025	28.7747	49.0616	49.0792	36.2581	35.6696	11.089	24.2079	26.2448	16.6372	11.8301	24.2453	28.6539	28.8089	26.679	21.3443	25.4858	20.6839	22.6683	24.9972	23.2061	8.51258
FvH4_3g16731			3.13509	0.926775	1.17568	0.0440512	0	0.0347421	0.157734	0.0754122	0.232465	0.0814189	0.120215	0.15181	0.205265	0.0202622	0	0	0.0292487	0	0.0660075	0	0.0449079	0.0673462	0.0294768	0.120199	0.0912382	0.128423	0.0968216	0.0538003	0.0248407	0.0190892	0	0.0508401	0	0.0312532	0.189121	0	0.0299772	0	0.0410061	0.0225362	0.0451983	0.0631298	0.0167262	0.0666301	0.201464	0.0896869
FvH4_3g17471			23.9267	18.7939	14.5186	2.28393	3.54923	6.06752	3.42566	3.80002	6.76528	2.82893	5.52343	3.9576	4.14824	2.57358	4.4628	3.86838	2.33177	11.4957	8.41249	1.98768	3.17635	2.59276	2.59895	4.48048	3.20674	4.18579	4.04965	3.94473	3.95175	3.85833	0.110606	5.31669	1.17137	3.92887	2.75106	2.23989	3.24862	2.9796	2.48926	1.70527	2.89817	2.75869	3.96221	2.96971	9.20288	4.79415
FvH4_3g19101		Polynucleotidyl transferase, ribonuclease H-like superfamily protein	4.11972	2.82446	4.43066	1.36832	1.06024	1.05666	0.850603	1.40483	1.05602	0.661159	1.25048	0.978029	0.80726	0.799834	0.414501	0.413486	0.525911	0.448563	0.623412	0.14288	0.485345	0.539863	0.721839	1.29143	0.801362	0.868054	0.766986	0.412215	0.728314	0.480069	0.192747	0.767061	0.550949	0.870624	1.49794	0.72269	0.729593	0.314763	0.767847	0.663953	0.59679	0.480029	0.360297	0.586954	2.55034	3.05471
FvH4_3g19102		Polynucleotidyl transferase, ribonuclease H-like superfamily protein	3.46377	3.50774	5.1112	1.10806	0.895455	1.07435	0.86988	1.33699	0.714329	0.576183	1.07367	1.13819	0.702444	0.822077	0.392294	0.346853	0.396086	0.265395	0.508621	0.257836	0.669997	0.699719	0.344353	0.629068	0.592596	0.530271	0.35161	0.34953	0.427342	0.508811	0.0793866	0.697092	0.835033	0.742533	0.817412	0.726312	0.419396	0.560566	0.43381	0.740154	0.726207	0.764954	0.485486	0.482252	1.96941	2.34484
FvH4_3g23130			36.4434	19.5259	36.572	13.873	8.52736	8.34815	13.7137	13.368	17.1778	7.6117	18.4082	11.2234	22.1399	4.69113	1.66173	1.1496	2.439	0.729818	7.94867	3.16703	5.90755	8.20063	6.48431	22.4388	11.6936	17.6657	8.71649	5.17522	4.01997	6.12986	0.460671	9.78501	6.62956	8.0813	5.28877	9.86908	10.2367	11.4966	9.95636	11.5011	4.46794	3.51136	3.77078	5.90839	23.9389	10.8806
FvH4_3g24700	ATC	centroradialis	54.1525	0	0	3.85069	2.81747	0.137522	0	1.20898	0	0	0.137643	0.0311355	0.117503	0.034702	0	0	0	0	0	0	0	0	0	0	0	0	0.083831	0	0	0	0	0	1.13459	0	0.0487482	0.0552444	0.0493043	0	0	0.0437388	0.040149	0	0.028646	0.0464984	17.8155	0.405753
FvH4_3g25041	AtELP3,ELO3,ELP3,HAC8,HAG3	radical SAM domain-containing protein / GCN5-related N-acetyltransferase (GNAT) family protein	2.51341	2.81191	4.17427	0.471614	0.121242	0.107845	1.05481	0.508483	0.735921	0.634985	0.756832	0.824679	1.27959	0.227077	0	0	0.0989602	0	0.0874054	0	0.139402	0.665784	0.274503	0.638355	0.442419	0.836902	0.556014	0.167005	0.624384	0.608737	0	0.679182	0.665819	1.10402	0.968951	0.409766	0.826417	0.734952	0	0.676208	0.306654	0.302309	0.103842	0.206831	6.10887	2.20952
FvH4_3g25441			3.60456	1.78175	1.50574	0.602129	0.455384	0.728242	1.56771	0.109091	1.55255	0.842811	1.52803	0.974415	1.28456	1.16555	0.655701	0.227674	0.630419	0.295638	0.488791	0.1205	0.871563	0.490639	0.952281	0.482894	1.93408	0.710209	0.283235	0.488069	0.231381	1.02428	0.40033	1.26694	0.256476	0.83097	0.602988	0.48386	0.336602	0.533121	0.237278	0.35207	0.445613	0.547942	0.518692	0.775601	0.71497	0.239261
FvH4_3g25650		NAD(P)-binding Rossmann-fold superfamily protein	6.45974	3.60274	5.60251	1.8546	1.35675	1.51503	2.00287	2.05118	1.77136	1.55497	2.63197	1.71992	2.96393	1.95694	1.10069	1.06019	0.792013	0.147105	1.51775	0.722542	1.27586	1.14357	0.789734	2.12237	1.97796	3.03555	1.48329	1.10138	1.18271	1.66638	0.0520436	1.51698	1.80034	2.37209	2.97342	1.80393	1.48135	1.01244	1.02535	1.60046	1.1376	1.22454	1.16329	1.50373	3.32956	2.37123
FvH4_3g26990		Flavodoxin family protein	11.9912	4.8846	11.8864	3.08424	3.11239	3.02915	3.81483	4.14666	4.97391	1.73844	5.14161	3.79206	6.18623	1.48366	1.21832	0.619592	0.832098	0.692581	6.10884	2.57704	3.24113	4.90554	2.6857	8.14843	4.58075	4.55862	2.83857	1.24724	1.05211	1.59238	2.77136	5.88065	2.64033	3.79971	4.14259	2.33957	3.48375	2.00531	2.58191	1.96153	0.832692	0.775334	0.77628	1.17322	9.36461	4.95144
FvH4_3g27741	DXR,PDE129	1-deoxy-D-xylulose 5-phosphate reductoisomerase	22.4607	12.5606	20.3264	3.12017	2.52155	3.05171	2.66268	2.00199	5.61105	2.08222	3.07256	3.01797	5.20672	4.28746	4.98979	2.43874	2.87363	0.50001	1.76186	0.996279	2.80123	4.02514	3.15582	5.26146	4.43311	4.25263	5.04107	3.8116	2.78387	3.24538	0.488256	3.78601	0.790928	2.88449	1.93621	2.74873	2.63218	2.67221	2.55938	2.48781	3.28919	3.97105	4.65496	3.55212	13.1181	6.52087
FvH4_3g27790			30.3876	29.0048	29.01	13.7015	10.3339	8.70397	17.7057	14.4817	12.9278	13.3299	17.0003	12.8669	15.0043	17.9278	14.7703	17.9973	16.9348	12.0441	11.4244	4.65646	13.9989	13.1051	10.6889	13.5517	15.6401	17.9515	17.1957	11.621	15.4002	15.003	0	15.1487	10.0268	12.3674	12.5924	9.57169	12.7596	7.91957	9.46415	12.9595	16.8931	20.2142	23.907	19.4325	14.2398	8.93034
FvH4_3g30421			12.1428	12.456	20.0887	4.25362	4.86538	3.26679	3.54006	4.26551	6.62008	4.63085	3.281	3.42147	1.06662	1.91049	0.500827	0.736067	1.66694	0	0	0.523693	2.00963	2.15603	1.45379	3.3457	2.99139	0.513162	2.59391	1.11524	1.40299	2.18713	0	2.19632	2.20142	0.503501	0.792239	2.50482	3.65574	4.05476	3.37306	2.49967	0.124729	0.4119	0.148455	0.0842784	3.14387	1.62391
FvH4_3g30422		aminoacyl-tRNA ligases;ATP binding;nucleotide binding	8.8003	6.57541	10.4833	6.4492	3.80724	1.49556	2.41982	3.59172	3.17019	2.20129	2.60635	2.90373	0.909488	0.921434	0.55773	0.497074	0.962898	0.0280693	0.0133189	0.0807988	1.74884	1.80248	1.46318	2.46471	2.17678	0.955147	1.74478	1.0162	1.17584	1.4899	0	2.4677	0.613629	0.469512	1.11252	2.13778	2.63566	2.84606	2.67581	2.92639	0.139387	0.267763	0.125474	0.197732	4.97665	3.12005
FvH4_3g30841			172.676	277.497	157.793	2.70362	7.33586	1.72398	8.25679	2.36213	3.49604	0.699262	11.2009	9.51121	0.42676	0.219925	0.143636	0.437252	0	72.6824	2.62377	0.355139	1.81282	0.917708	0.122569	0.161079	0.486008	0.56053	0.541267	0.477749	0.309873	0.432962	0.137357	0	2.38608	0	0	0	0.244356	0.397686	0	0.106194	0.069601	0.0578505	0	0.111599	0.354494	0.152873
FvH4_3g31113		ATP synthase alpha/beta family protein	3.34277	6.33179	5.34165	1.05633	1.12817	1.08379	1.6067	1.87922	1.61423	1.67912	1.48298	1.25469	0.714446	0.947155	1.19478	1.23696	1.11854	1.1547	1.40089	0.22326	0.552683	0.51824	0.209745	1.3089	0.554955	1.17025	1.09956	1.18824	1.32558	1.3836	0	0.70484	0.475876	0.212	0.14881	1.22719	1.37322	0.487791	0.841179	0.333796	0.60398	0.99014	0.681103	0.59756	0.128092	0.328755
FvH4_3g31180			27.0986	45.2259	14.6745	0.109891	0.113003	0	8.40366	2.66652	1.15107	0.764647	14.7771	5.50216	0	0.0586228	0	0	0	0.147819	0.73585	4.30904	0	0.295792	0	29.2036	0.317461	0	0.0933749	0	0	0	0	0.161978	21.6127	0.180843	0.10888	0.475244	3.23727	2.40919	0.716972	0.204292	0.0678245	0	0	0	0.123327	0
FvH4_3g31600			12.2033	10.3111	9.80774	3.83025	3.39462	5.49554	4.0773	4.64676	4.58535	4.33031	5.15631	4.55149	4.29508	2.81896	4.38328	5.52334	5.31793	2.46265	2.61037	1.69634	3.56387	5.19215	3.48114	4.61243	4.78581	4.77811	5.24719	6.28806	8.7478	5.68629	0.524691	4.64127	5.7086	6.18801	5.03006	4.3848	4.28859	5.95641	4.94192	4.26448	3.62796	3.6013	4.84862	5.02692	14.6715	4.79722
FvH4_3g31623			23.2217	12.5502	20.7859	7.46982	6.02684	5.50761	10.1124	9.33982	10.9267	7.03444	9.72978	9.13954	12.3045	3.8092	3.20112	2.62893	2.44998	1.2663	4.31257	2.99735	4.86865	6.98506	5.43265	12.6536	6.33778	9.25177	5.98656	3.40198	3.29921	4.52507	0.0841643	8.0227	5.59256	6.91606	6.262	6.89288	7.20624	5.65859	8.33442	7.00577	2.43997	1.42743	2.01453	2.77873	12.1382	10.2705
FvH4_3g34320			3.92473	27.2825	13.1843	0.212759	0.0415374	0.0365836	3.77648	0.755695	0.414087	0.533372	2.9041	0.444639	0	0.0426724	0	0	0	4.34939	6.12048	1.04203	0	0	0.0534517	3.58057	1.09702	0	0	0	0.0318981	0	0	0.0965569	0.181689	0.0329097	0	0.105036	0.0606287	0	0	0.0237307	0	0	0	0	3.71153	0.302583
FvH4_3g34410	PRS,PRS1,WOX3	Homeodomain-like superfamily protein	7.76658	7.84484	1.11602	0.0442138	0.0913842	0	0.682859	0.0438922	0.437501	0	0.875415	0.40874	0.12078	0.913107	2.5661	2.20131	0.674464	0	0.50401	0.201297	0	0	0	0.0450938	0	0.149493	0.189095	0.606097	1.1263	1.08886	0.0420822	0	0.0488303	0	0	0.0375489	0	0	0.0954673	0.227344	1.36247	0.158207	1.98323	0.632088	0	0
FvH4_3g35570		SEC14 cytosolic factor family protein / phosphoglyceride transfer family protein	3.02811	1.37434	1.66638	0	0	0.724819	0.0176686	0	0	0.047346	0.0224857	0.0198446	0.037139	0.0221177	0.0377065	0	0	0	0	0.0909264	0.373081	0.272207	0.151938	0.304699	0.0279912	0.0735738	0.159119	0.0373258	0.0271155	0	0.259215	0.0611125	0	0.0544125	0.0310703	0	0.0942742	0.206245	0.0340556	0.0524774	0	0.0151867	0	0.0148182	0.561262	0.147808
FvH4_3g36252		XH/XS domain-containing protein	31.9571	8.96399	35.8403	1.48608	0.355185	0	6.14879	0.787772	1.65203	0.715661	7.52161	1.78121	1.33585	1.89197	3.45735	1.73622	1.12672	1.46908	8.18516	2.26448	2.51334	2.82024	5.99819	0.667677	0.205256	0.820037	0.668212	2.02398	4.821	2.28084	0	0.308644	0.359175	0.152651	0.102261	2.17649	3.67599	1.86136	0.811464	0.850489	0.482305	0.100814	0.303003	0.159847	0.00859488	0
FvH4_3g36641	ATGRAS2,GRAS2,SCL14	SCARECROW-like 14	1.55835	2.00758	2.51373	0.495977	0.44709	0.567521	0.552993	0.388136	0.748639	0.709174	0.66805	0.853734	1.03644	0.93677	0.857856	0.569208	0.608782	0.0920352	0.841375	0.392924	0.36141	0.421335	0.180083	0.875716	0.657823	0.997731	0.762694	0.784029	0.600329	0.648672	0.0188221	0.838196	0.550201	0.589916	0.662229	0.722181	0.802939	0.39539	0.29459	0.65229	0.275674	0.385321	0.296254	0.420986	2.67872	1.78838
FvH4_3g38010		Thioesterase superfamily protein	7.72413	7.0838	7.18439	0.164091	0	0	0	0.164635	0	0	0	0	0.0644161	0	0	0	0	0	0	0	0	0	0	0	0.04776	0	0	0	0	0	0	0.142034	0	0	0	0	0	0.0890652	0	0	0	0	0.0289601	0.0499873	0.385728	0.15491
FvH4_3g38060		Thioesterase superfamily protein	7.5362	7.00125	7.06585	0	0	0	0	0	0	0	0	0	0	0	0	0	0	0	0	0	0	0	0	0	0	0	0	0	0	0	0	0	0	0	0	0	0	0	0	0	0	0	0	0	0.632955	0.418056
FvH4_3g38472		Pentatricopeptide repeat (PPR) superfamily protein	3.29082	3.73031	4.51649	1.68597	1.70559	1.44021	1.3222	1.52643	0.871816	0.981999	1.00794	0.635497	0.776333	0.884599	0.742348	0.679786	0.689265	0.0822993	0	0	1.02876	0.289285	0.577671	0.468891	1.18247	1.09599	1.08609	1.09428	0.776833	0.908512	0.44075	2.12343	0.495954	0.804219	0.819137	0.553176	0.803655	0.527907	0.779699	0.992206	1.2917	0.961717	0.467904	0.623107	1.64405	1.01174
FvH4_3g38940		ATP binding;nucleic acid binding;helicases	4.82738	3.65877	4.76061	2.38201	2.35378	2.04645	2.85269	2.17555	2.44653	1.2857	2.28531	1.77674	2.45461	1.74158	1.31958	1.19484	1.35945	0.242287	1.13737	0.577032	1.2954	1.43713	0.987433	2.17809	1.2365	2.12634	1.51377	1.37235	1.16173	1.38399	0.168285	1.59544	0.592432	0.992198	1.58728	0.67045	1.15854	0.766821	0.85576	0.945727	1.01621	1.07212	0.722538	0.90651	2.70871	1.77025
FvH4_3g40182			2.17723	1.7465	2.54516	0.19651	0.384985	0.508202	1.02631	0.329949	0.541601	0.560033	0.665716	0.743098	0.448431	0.420072	0.383501	0.129418	0.156596	0.264475	0.200286	0.214948	0.139905	0	0.131379	0.533525	0.627832	0.480954	0.213136	0.288158	0.0902731	0.107977	0	0.458344	0	0.235137	0.0466054	0.504602	0.430073	0.231069	0.23645	0.0737998	0.074006	0.278498	0.0821605	0.198007	0.36127	0.171226
FvH4_3g40280	CHAL,EPFL6	allergen-related	135.262	27.3903	43.2266	0.912048	1.03551	0.451715	5.83181	4.20424	48.5005	42.6928	38.6092	35.1506	20.289	26.707	11.5648	7.13828	4.0183	21.6877	35.8655	7.82428	9.18632	4.02759	2.41478	33.1715	50.7106	8.51184	48.2405	8.52761	4.68891	2.89379	0	47.0061	7.24766	5.78799	0.579319	31.7694	38.4321	25.701	22.3295	29.4757	4.54229	0.954374	5.30394	5.94838	25.2228	4.54231
FvH4_3g41091			26.0988	4.04736	6.20666	0.0905329	0.16134	0.0936253	0.290906	0.181666	0.275711	0.174885	2.39921	0.536172	2.88306	0.434793	0.26059	0.216113	0.196555	0.453918	0.560656	0	0.0833121	0	0.18174	0.979933	0.0527007	6.44211	0.500777	1.08507	0.651207	1.13061	0	0.104485	0.738509	0	0	0	0	0	0	0.0463157	0.378496	0.129743	0.375708	0.497705	0.233279	0.120195
FvH4_3g41161			2.96165	2.3554	2.027	0.816172	0.768428	0.486204	1.43797	1.0844	0.65156	1.20853	0.642353	0.834915	2.12021	0.995065	1.67959	1.40269	1.00297	1.67251	1.22795	0.23337	0.522997	0.81776	0.381123	1.59907	1.07597	1.42749	1.59737	1.02594	0.983785	1.05885	0	1.10127	0.725676	0.760278	1.30393	0.912684	1.11654	0.452822	0.46244	0.390512	1.03056	1.12051	1.61625	1.31421	2.01484	0.887808
FvH4_3g41640		Transducin/WD40 repeat-like superfamily protein	6.37422	7.09072	8.15596	0.236193	0.338489	2.50871	0.256165	0.200226	0.0449644	0.330999	0.231401	0.137739	1.08486	0.19282	0.226809	0.0761928	0.133896	0.0854284	0	0	0.06465	0.76472	0.608199	0.0615042	0.242096	0.0970321	0.0704666	0.0774516	0.0436095	0.122417	0.584128	0.036595	0.570862	0.125866	0.12293	0.481522	0.169199	0.134319	0	0.0324434	0	0.0461942	0	0	4.24536	1.12454
FvH4_3g41940			2.01212	1.97889	2.34957	0.890508	1.23204	0.204339	1.29234	0.889518	0.587261	1.17033	0.713685	0.951676	0.539143	0.335321	0.391469	0.308558	0.23453	0.833681	0.867861	0.424817	1.05031	1.05362	0.744814	0.96605	1.59585	0.468752	0.543096	0.292293	0.254193	0.275589	0	1.59658	0.246721	0.159	0.741553	0.32204	0.801819	0.82544	0.975168	0.636219	0.682699	0.629246	0.68681	0.70943	1.26175	0.952734
FvH4_3g43590	CLV3	CLAVATA3	8.21205	8.05424	9.53993	4.2001	1.75426	1.55564	4.33936	2.86442	1.02826	0.994368	3.97271	3.48015	0.227173	0.121108	0.0509105	0	0.202403	0.281071	0.34236	0.562099	2.40482	1.07555	0.726555	3.34703	1.48188	0.0610745	0.106862	0.14568	0.0822503	0.0316032	2.04621	1.28007	2.1241	0.134267	1.11419	1.45257	1.26477	0.542571	0.839712	0.472574	0.352016	1.20118	0.477003	0.532167	0.706134	0.514383
FvH4_3g45051		RING/U-box superfamily protein	9.08112	11.0371	7.51635	5.16894	3.25517	2.13218	5.56067	6.44701	5.50219	3.55466	4.62506	4.51266	2.8528	1.77317	0.806275	1.65572	0.97513	1.68116	1.6124	0.849436	1.67547	1.50339	0.928311	2.7006	4.75722	1.57671	1.9993	0.877677	1.4629	0.772848	1.33621	3.97058	1.04172	1.96512	2.53619	2.00716	2.04758	1.12899	0.933854	1.04094	1.15443	1.09719	1.22463	1.31792	8.0025	3.35326
FvH4_3g45301		RNA-binding KH domain-containing protein	3.82279	0.53997	0.0246951	0.127323	0.0612244	0	0.0753675	0.587156	0.0969546	0.205101	0.0628944	0	0.798217	0.340616	0.244528	0.122678	0.0494801	0	0.248601	0.135835	0	0	0.170286	0.265237	0.0907046	1.35781	0.592332	0.167005	0.226621	0.059256	0	0.078908	0.130214	0.174383	0	0.104753	0.0912091	0	0	0.034978	0.036385	0	0.0760543	0.0627256	0.142342	0.0332164
FvH4_3g45630		disease resistance protein (TIR-NBS-LRR class), putative	9.8604	4.07723	5.90185	2.09612	2.47386	0.976506	1.34107	2.17054	1.99447	1.13689	2.9647	1.86776	1.43395	1.45615	0.658768	0.326976	0.54677	0.0876765	1.96235	1.25745	0.949611	1.28533	1.02663	4.67804	1.48154	1.10375	1.39826	0.909987	0.573211	0.810107	0.019623	1.3759	1.22529	0.355825	0.882529	2.0467	2.2055	1.11546	0.884506	1.012	0.344414	0.292165	0.147954	0.291196	9.8913	6.66879
FvH4_3g45631		NB-ARC domain-containing disease resistance protein	5.2021	3.06108	4.03452	1.11751	1.16472	0.36967	0.564708	0.920387	0.491643	0.358107	1.22798	0.782601	0.822111	0.614973	0.284206	0.177413	0.225668	0.0309155	0.524009	0.358165	0.374966	0.535309	0.451289	2.37154	0.877665	0.580333	0.512404	0.240617	0.26577	0.348083	0	0.925472	0.746363	0.182197	0.373511	0.958415	0.625453	0.555953	0.441186	0.55727	0.127336	0.154977	0.135744	0.286235	4.89678	3.91975
FvH4_4g00580	EMB3012	embryo defective 3012	18.4271	8.10707	13.5343	4.27894	2.79452	3.19431	4.81463	6.17234	5.01216	3.27782	5.29516	2.24383	7.5248	0.960077	0.0522532	0.079534	0.458362	0.513632	2.68896	1.36135	2.57845	2.95026	3.00716	12.7749	3.49463	5.49941	2.28397	0.787618	0.967806	1.21543	0.0499692	4.3182	5.47639	6.1747	4.34092	3.06809	3.07134	3.52844	3.41559	4.02475	1.09662	0.608617	1.016	1.17642	15.0057	7.58729
FvH4_4g01210	DXR,PDE129	1-deoxy-D-xylulose 5-phosphate reductoisomerase	9.85039	5.74461	9.9291	2.63097	1.77769	3.42257	3.11356	2.2855	3.53966	1.65507	3.08684	2.556	4.04092	2.5238	2.14667	1.66746	1.92094	0.361304	1.20037	0.856699	1.66992	2.81804	1.96826	3.43743	3.3154	3.15026	2.72108	2.25812	2.50898	2.67065	0.122507	3.22299	1.28902	1.84328	1.76111	2.28032	2.73642	2.06734	2.24302	2.00173	3.02819	2.49755	2.6268	3.57017	9.71076	2.04592
FvH4_4g01220			29.0643	20.8373	25.7458	15.7428	14.0168	8.6992	8.37828	10	9.47711	6.22147	10.4141	10.0303	8.76911	4.48677	3.32002	2.99425	3.49499	3.41472	5.56699	1.44079	5.40704	6.3998	4.48513	10.6745	6.60733	5.34562	4.33994	3.77831	3.7545	3.77363	2.82283	7.11239	4.41786	7.74954	5.96629	6.01387	5.71332	4.84913	4.8323	4.8498	4.41529	3.36723	3.73423	3.86981	16.9738	7.53917
FvH4_4g02430			24.6227	159.139	10.6523	4.98596	20.3805	0.825114	5.07462	30.4619	5.21841	4.5184	5.88033	4.77179	0.456124	1.33828	0.119183	0	0	1.79296	3.27328	2.95538	1.95096	8.80992	5.48033	12.5178	1.33096	0.0840099	0.129284	0	0.0268666	0.00846515	0.0627426	0.582429	3.60361	0.365606	0.0126223	8.5358	17.7528	15.3731	11.9899	2.01071	0.141819	0	0.00741727	0.0119017	0.350036	0.0136261
FvH4_4g03750	LSH6	Protein of unknown function (DUF640)	54.236	11.086	16.0113	0.566431	0.118142	0.0520259	2.33863	0.397109	4.3453	0.975945	10.1056	6.33757	6.47608	2.45215	1.80667	1.17894	0.684574	0.0765094	0.366353	0.0655285	0	0	0	0.783965	0	7.60195	3.01737	5.57397	2.19466	1.79315	0	0.121904	0.195565	0.0746463	0.0563551	0.496421	0.964448	0.415656	0.35641	1.59281	0.722115	0.522415	0.490369	0.342321	9.19768	2.57033
FvH4_4g05721			5.3638	3.24326	5.67627	1.31091	1.70705	0	0.941839	1.92459	0.556322	0.174006	2.38159	0.768246	0.320334	0	0	0	0.0907928	2.26663	2.91732	0.523693	3.57392	2.35333	1.11322	0	0.0796	0	0	0	0	0	0	0.379522	0.144963	0	0.088356	0.309636	0	0.148442	0.381869	0.158553	0	0	0	0	0.80864	0.337285
FvH4_4g08631			36.9886	34.4445	32.3195	8.63637	9.45589	6.79926	20.6134	14.7105	19.1947	13.5681	20.1391	19.8576	13.5025	7.17596	5.84055	5.01787	4.42725	6.6245	11.5758	5.06172	14.0372	10.2051	10.5479	18.5101	21.4047	10.791	8.79967	7.3682	7.35147	8.93747	0.138116	16.8768	12.1925	7.87008	10.2907	13.0159	9.5396	8.91157	8.40853	8.87357	6.79239	5.03208	5.76755	6.97734	29.0761	14.1148
FvH4_4g09774			18.5898	8.13614	14.5158	1.30645	0.888394	1.85817	2.16609	3.14317	2.80067	1.49402	3.53102	1.94172	3.11626	0.751393	0.130302	0.394037	0.360766	0.41657	3.12372	1.13954	0.966942	1.36407	1.29097	6.33688	1.62863	2.17315	1.07437	0.257973	0.582783	0.602255	0.124607	1.74772	1.10764	3.29503	1.56514	1.61551	1.10836	1.39898	2.10494	2.3575	0.776773	0.540884	0.802457	0.756365	4.0156	1.63723
FvH4_4g10520		Ribosomal protein L35Ae family protein	2.342	2.00654	2.07423	0.666365	0.525065	0.824693	0.338639	1.2232	0.538336	0.354153	0.578348	0.254155	0.173706	0	0.0578308	0	0	0.184882	0.157647	0.0732594	0	0.235911	0	0.143049	0.696849	0.10216	0.0409736	0.102282	0.0415873	0.0319583	0.679295	0.315129	0.0702278	0	0.0476527	0.50597	0.393531	0.312406	0.241764	0.198699	0	0	0	0	0.258032	0.156984
FvH4_4g11065			3.3752	2.54623	6.81827	0.596079	1.16682	0.598221	0.48208	0.187274	1.73187	0.588312	1.5623	1.03278	0.684311	0.131344	0	0	0.0791682	0.126878	1.87074	0.532862	0.827055	0.222991	0	0.606885	1.11511	0.350604	0	0	0	0	0.441134	0.695154	0.11597	0.356624	0.46965	1.19542	0.434852	0.457595	0.358617	0.182808	0	0	0	0	0.327672	0.27193
FvH4_4g11260			0.924078	1.3043	2.26746	0.416237	0.706153	0.0694843	1.05938	0.782568	0.72402	0.427129	0.528822	0.4127	0.0691717	0.53784	0.253594	0.316163	0.303011	0.458231	0.56499	0.341633	0.449079	0	0.320952	0.472829	0.541478	0.282366	0.178044	0.298178	0.170851	0.319316	1.18549	0.570147	0.419481	0.0498477	0.453508	0.410906	0.472502	0	0.269204	0.459698	0.20761	0.36382	0.425464	0.0814502	0.284415	0.0413224
FvH4_4g13561			2.62902	0.679103	0.405649	0.401855	0.238718	0.138527	0.381202	0.229315	0.692867	0.406856	0.426136	0.295784	0.105169	0.198431	0.210079	0	0	0.671613	0.572677	0	0.259824	0.515671	0.398344	0.117796	0.255683	0	0.0981389	0.103979	0	0.0844348	0	0.371777	0.38267	0.0757888	0	0.312373	0.623626	0.283715	0.658683	0.575618	0.157826	0.227671	0.0945636	0.163224	0.0167942	0.0315739
FvH4_4g14020		Cleavage and polyadenylation specificity factor (CPSF) A subunit protein	6.77572	2.35884	2.29719	1.39545	0.963979	0.722745	1.51694	1.3718	1.97466	1.20492	1.14365	1.51061	0.36179	0.299816	0	0.278328	0.223534	0.953452	2.01477	0.591465	0.614446	0.931159	1.21138	2.47643	1.09968	0.646671	0.198952	0.282926	0.174177	0.663168	1.11881	0.606876	0.899049	0.28433	0.131937	1.05956	1.03846	0.805471	0.506282	0.505636	0.446115	0.23627	0.406353	0.377466	0.751308	0.564802
FvH4_4g14081			14.9889	7.46723	10.1456	2.75306	2.57003	1.83506	5.17301	4.46288	4.03181	2.39293	4.7886	3.72433	4.32863	1.04425	0.158193	0.318881	0.882225	0.123783	0.797373	1.65539	1.14387	1.68276	1.29735	6.11819	2.14115	3.07175	1.31558	1.11897	0.974649	1.40431	0	1.86156	1.92144	3.05466	1.43892	2.76535	1.70562	3.74398	2.65639	2.86453	1.31018	1.07336	0.860148	1.26835	9.12779	4.10424
FvH4_4g14090			38.0273	18.3657	26.0336	6.78431	4.11954	4.57254	8.60606	8.21666	9.21473	3.8678	10.1265	4.95018	9.50994	2.38998	0.542801	0.183656	0.769702	0.677949	4.44697	2.04906	2.34196	4.37885	2.81791	10.5282	4.27332	7.38519	3.20209	1.69228	1.27654	1.77483	0.197949	4.33636	3.23126	6.38226	2.84984	4.85664	4.8155	5.87083	5.64333	6.67137	1.97936	1.26059	1.6638	2.15973	15.8056	8.7641
FvH4_4g14310	ATOST1,OST1,P44,SNRK2-6,SNRK2.6,SRK2E	Protein kinase superfamily protein	29.3478	15.733	24.2564	12.6341	8.96894	10.9346	9.31204	10.268	13.5138	6.86376	10.4222	8.6182	12.5693	7.64988	5.96031	5.86586	6.49095	0.775724	5.6697	2.25866	8.63459	10.8559	8.63067	13.3808	10.6906	13.0385	10.1857	7.59503	7.54564	7.90424	0.333777	11.0934	5.6895	11.1041	9.15689	7.98913	10.1943	9.36073	8.27901	9.37527	9.91724	7.1854	6.50054	11.5131	37.1516	21.0478
FvH4_4g15330	RRP41	3'-5'-exoribonuclease family protein	101.866	107.237	95.0478	52.8955	42.1789	37.5807	58.0831	64.7319	70.6436	53.9338	63.3543	73.6502	45.7296	38.6034	29.9243	31.667	32.3926	34.4999	39.0532	25.4445	38.2731	40.1817	31.8661	54.2284	47.7057	40.2563	46.2392	32.5205	37.095	33.3519	1.54885	48.0674	50.677	57.9906	38.2994	55.0723	52.5807	57.2811	56.0678	47.1212	41.2438	35.3772	33.9614	40.4502	140.853	73.7113
FvH4_4g15700		alpha/beta-Hydrolases superfamily protein	371.835	279.672	215.105	66.5828	68.5931	74.4535	76.4724	95.6348	118.183	104.196	109.947	95.6548	97.0606	77.1141	79.472	100.426	83.5267	109.848	90.7529	31.6659	52.1812	45.1157	40.0205	130.506	92.4142	75.9343	96.7505	106.462	116.977	82.7323	38.0925	102.201	149.124	61.4939	75.0861	73.0051	102.659	128.84	121.252	100.722	83.679	65.7618	77.6649	94.2159	238.449	67.4865
FvH4_4g15860		Ribosomal protein L13 family protein	364.34	431.241	405.935	46.847	61.1837	46.6864	120.49	44.9715	85.0016	60.386	110.913	98.2057	65.1671	73.4044	62.3431	69.2383	60.0583	211.123	138.914	27.0653	72.2359	50.0145	28.1575	58.9048	71.4029	64.8523	50.4115	47.2056	51.043	47.5334	1.56384	73.5828	46.4026	24.487	24.4638	64.6234	59.9781	37.4196	31.502	28.946	73.1322	66.3433	72.0603	76.6086	213.017	259.929
FvH4_4g17470		Metallopeptidase M24 family protein	10.1974	7.8582	10.9391	6.89185	4.99789	4.84684	6.19252	6.43268	4.82259	3.20689	5.55589	5.17414	3.90631	2.55259	1.28012	1.39397	2.39688	1.96161	2.34115	0.751434	4.76142	6.14622	4.46243	5.00341	5.2307	3.73479	2.08539	1.70549	1.7247	1.78962	0.530327	5.03953	5.53353	4.20846	5.35454	4.76349	3.5599	4.01969	4.35336	4.09114	2.3894	2.25494	2.06177	2.67681	6.08611	3.73485
FvH4_4g18160	ATSCAR2,DIS3,ITB1,SCAR2,WAVE4	SCAR homolog 2	7.40943	3.71984	5.0475	1.5581	2.06632	2.1021	2.66662	1.63413	2.14278	1.75618	2.47257	2.08579	2.93574	0.79377	0.581309	0.517924	1.03212	0.177182	1.68155	1.73899	1.86977	2.19814	3.04108	5.1446	2.69833	2.38539	1.24615	1.26531	0.834723	1.34016	0.184597	1.95955	2.61075	1.40994	1.36542	2.79424	1.93907	2.09682	1.74638	1.26235	1.48933	1.48679	1.17247	1.68343	7.07561	3.19324
FvH4_4g18920			6.49927	1.06842	1.81393	0.148931	0.154672	0	0.237681	0.198752	0.702723	0.0994507	0	0	0.942673	1.26183	1.18928	0.307194	1.43813	0	0	0	0	0	0.11558	0	0.458297	0.698235	0.60637	0.210954	0.0974017	0.435506	0	0.219522	0	0.122545	0.44643	0	0	0	0	0	0.223185	0.776034	0.515443	0.84067	0.78599	0.249468
FvH4_4g18970			5.599	3.30595	5.49703	3.27519	2.41414	1.94329	3.81342	3.28632	3.19574	1.88839	2.52807	1.82854	2.83599	1.71922	0.558717	0.51297	0.795899	0.249066	0.512122	0.658677	2.3525	0.743179	0.542973	2.45869	2.74403	2.36445	1.49757	0.93002	1.12227	1.07801	1.1153	2.68386	1.1749	1.99089	1.65169	3.41597	2.01181	1.50607	1.39806	2.18384	0.922873	1.12287	1.10019	0.972358	4.42526	1.97527
FvH4_4g19680			19.4578	4.62343	9.51908	0	0	0	0.444736	0	0.118982	0.561713	0.582231	0.134641	0	0	0	0	0	8.45524	5.99265	0.31048	0	0.119459	0.180081	0	0.149148	0	0.0434125	0.156086	0.0440627	0	0.0585949	0.0542175	0.223224	0.110874	0	0	0	0	0.200814	0.119925	0	0.0758905	0	0.117637	0.14943	0
FvH4_4g20850			398.831	489.303	326.909	99.564	70.1889	139.028	89.0671	132.583	173.777	132.502	125.149	148.478	119.778	112.712	148.137	128.447	118.974	43.129	34.434	27.3257	80.2595	105.451	101.923	163.936	134.192	113.239	120.275	131.839	131.673	112.85	427.902	122.732	89.3392	146.441	125.169	89.7616	90.9046	108.746	126.813	101.461	111.969	100.398	136.631	110.721	145.624	67.7274
FvH4_4g21890			12.424	5.86255	10.8799	3.55973	2.8961	3.34713	3.90568	4.31536	4.82167	2.18435	5.57178	3.09083	5.69875	1.1568	0.219991	0.127422	0.714591	0.43679	1.33433	0.456998	1.61947	3.05279	1.56411	5.76351	3.57671	3.96484	2.48088	1.03161	1.20678	1.36785	0.0320649	2.71192	2.03829	2.36861	2.20997	2.36136	2.89739	2.62871	2.21253	3.33661	1.00762	0.637769	0.791225	1.80986	10.6272	4.17184
FvH4_4g22580	ASK1,SNRK2-4,SNRK2.4,SRK2A	Protein kinase superfamily protein	125.18	69.9961	98.8943	25.0755	31.7805	28.4216	31.7905	23.3127	32.3711	23.838	30.2243	28.9365	33.0436	25.3148	33.3141	37.5884	36.751	6.79883	13.9626	7.54124	47.1519	46.8833	44.7299	29.47	35.0701	30.8441	32.121	35.6816	36.9588	40.5775	1.16916	39.8633	18.9635	38.1575	33.2372	22.6982	28.5799	30.3542	29.9477	32.9696	27.2917	29.5522	33.1035	36.6246	64.6817	47.5232
FvH4_4g23430		CBS domain-containing protein with a domain of unknown function (DUF21)	9.021	6.31454	4.77406	1.88864	3.07809	3.86317	1.71017	3.49694	3.56694	1.90102	2.70894	1.57329	3.63644	1.05648	0.203148	0.0842376	0.298027	0.448934	2.14024	0.617455	1.16712	1.43649	1.28553	5.45777	1.907	4.00575	1.4547	0.567571	0.512521	0.57276	0.231678	1.82643	2.72135	1.94967	1.93553	2.95216	4.28865	3.41192	2.8578	2.83062	0.375517	0.178321	0.155129	0.129498	3.23011	1.59609
FvH4_4g24630	ATMRP3,MRP3	multidrug resistance-associated protein 3	7.56024	4.7768	5.10591	1.27991	1.84354	0.735089	1.36452	1.18562	2.54173	0.685004	1.48366	1.29112	0.898618	0.509141	0.252082	0.118856	0.147994	0.0843452	0.370566	0.951857	0.48437	0.269885	0.323846	3.08666	0.395983	1.2639	0.84769	0.730526	0.340118	0.445064	0	0.352255	0.551779	0.103364	0.0682553	0.879698	0.944038	0.530799	0.455886	0.367656	0.147157	0.113386	0.0633258	0.145792	1.52919	0.4938
FvH4_4g26140			134.37	45.4929	22.6895	17.3867	17.7017	0.153045	11.2212	5.28028	6.97748	3.4138	2.42143	3.29547	16.1216	12.019	4.12917	3.85081	1.84592	9.03405	8.30858	8.5835	2.10005	12.6192	1.29184	10.8743	3.34867	21.9462	15.576	12.9735	6.11762	6.58212	0.0480939	7.50162	1.2783	0.473674	0.238129	3.34526	2.43304	0.56012	2.07413	1.16523	2.21411	1.53612	2.49096	1.70697	11.1901	1.67534
FvH4_4g27360	CLE43	CLAVATA3/ESR-RELATED 43	25.2823	27.499	10.678	5.86434	4.71755	1.66126	5.34057	5.76788	3.21555	4.03133	7.0562	4.25597	2.43384	3.67973	3.72687	2.87014	4.0837	7.92188	8.18011	0.825906	2.35993	0.525005	0.658098	14.3999	4.90243	0.552816	0.398527	0.260515	0.331272	0.0521888	0	5.52344	0.714083	0.170889	0.102887	2.83968	2.6363	2.31493	1.46226	4.15249	4.65546	4.71893	5.03859	3.22036	5.53443	0.78517
FvH4_4g28170	BRC2,TCP12	TCP domain protein 12	9.01772	9.78012	0.809272	0.117812	0.0841393	0.715213	0.0464917	0.225928	0.259949	0.0519982	0.481333	0.411079	1.5533	0.265105	0.273149	0.396049	0.0877893	0	0.662252	0	0.029109	7.74355	1.04765	1.40102	0	1.50754	0.774234	0.938958	0.876623	0.500951	0	0	0.097189	0.0403391	0	0.0926509	0.272153	0.230295	2.19681	0.152112	0.248869	0.268178	0.2145	0.116527	0	0
FvH4_4g28580			22.4354	26.7201	42.8618	1.20685	2.57833	0.225614	4.37483	5.17563	4.64229	4.71969	19.6504	6.44507	8.81675	4.6204	5.65906	5.59491	7.63748	1.55084	4.13798	2.57652	1.999	1.38287	1.69555	6.10798	2.56492	8.78485	9.03948	14.6056	12.9001	16.1557	0	4.99757	6.91209	0.337977	11.0571	1.34852	1.01594	2.11137	2.46727	2.91274	10.3829	12.1798	10.8909	17.7003	11.9191	1.5756
FvH4_4g28720			6.80085	6.93466	1.58589	0.186611	0.0897335	0	2.4576	0.372629	0.599865	1.78438	1.55939	1.67959	0	0	0	0	0	0	0.150155	0.0995433	0	0	0	2.98306	0.265882	0	0	0	0	0	0	0.139062	1.19913	0	0	0.146756	0.332849	0	0	0	0.0761537	0	0	0	0	0
FvH4_4g29311			4.49438	0.62542	2.53522	0.152956	0	0.46327	0	0	0	0	0	0	0	1.31393	1.11285	0	2.43924	0	0	0	0	0	0	0	0	0.14856	1.47837	0.246029	0	0.111819	0.702797	0	0	0	1.03162	0	0.115932	0	0.251275	0	0	0	0	0.054667	0.0382124	0
FvH4_4g29520			0	7.41856	17.3428	0	0	0	0	0	0	0	1.94205	0.0506315	0	0	0	0	0	1.48741	0	0.695969	0	0	0	0	0	0	0	0	0	0	0	0	0	0	0	0	0	0	0	0	0	0	0	0.147761	0.014678	0
FvH4_4g29600	AGL7,AP1	K-box region and MADS-box transcription factor family protein	29.7713	341.719	69.0187	1.34453	1.8875	1.52176	3.53589	2.97837	0.0748653	0.09682	7.81987	1.03053	0	0.0226148	0	0.029147	0	0.066231	0	0	0.185855	0.239383	0.0566548	0.26831	0.0286202	0	0	0.0300234	0	0.030991	7.54706	0.0341144	0	0.0348818	0.169076	0	0	0	0	0	0.143856	0.0310558	0.0373364	0.148037	0.0211814	0
FvH4_4g29610	AGL3,SEP4	K-box region and MADS-box transcription factor family protein	4.46895	22.2064	19.3307	0	0	0	0.45213	0.430472	0.231674	0.0641204	4.58504	0.582862	0.0927343	0	0	0.071179	0	0	0.179911	0	0.0612007	0	0	0.343906	0	0.249482	0	0.176461	0.0412828	0.0260148	0	0	0	0	0.873174	0	0	0	0	0	0	0.0189602	0.0227945	0	0	0
FvH4_4g29810	CYP78A5,KLU	cytochrome P450, family 78, subfamily A, polypeptide 5	77.5281	65.8607	313.674	5.55894	0.112381	0	43.1097	9.74751	1.0477	0.215412	103.359	3.72554	0.214209	0.139136	0	0	0	81.8346	0.611239	0.173332	0.24094	0	0	0	0.193335	0.0768094	0.0139451	0	0	0	0	0.0608682	4.68665	0.0818259	0.021443	0.0200765	0	0.0518304	0.0934594	0.0436552	0.0476871	0.0627773	0.0885968	0.0683727	0	0
FvH4_4g31000	ATMIXTA,ATMYB16,MYB16	myb domain protein 16	30.3832	37.2674	9.00687	0.0542865	0.0281897	0	2.88279	0.640083	0.287612	0	7.81212	1.10243	0	0	0	0	0	0	0	0	0	0	0	0.0305308	0	0	0	0	0	0	0	0	0.246609	0	0	0	0	0	0	0	0	0	0	0	0	0
FvH4_4g33370	KNATM	KNOX Arabidopsis thaliana meinox	0	9.23745	0.0885108	0	0	0	0.0282077	0	0.0624642	0.0221001	0.0358983	0	0	0	0	0	0	0	0	0	0	0	1.47248	0	0	0	0	0	0	0	0	0	0	0	0	0	0	0	0	0	0	0	0	0	0.083029	0.0175421
FvH4_4g34011			3.18695	4.27824	3.32084	0	0	0	0.200786	0	0	0	0	0	0	0	0	0	0	0	0	0	0	0	0	0	0	0.130874	0	0.0954314	0	0	0	0	0	0	0	0.125	0	0	0	0	0	0	0	0	0.018697	0
FvH4_4g35032			2.41597	2.86841	1.57439	0.342992	0.118738	0	0.596438	0	0.685868	0.424878	0.671891	0.894749	0.208214	0.575827	0.393086	0.238968	0.0880415	0.664829	1.13378	0.771261	0	0.442889	0.0887282	0.490412	0	0.367363	0	0.411715	0.315503	0.423127	0	0.153034	0.659945	0	0.624475	0.0970962	0.17689	0.136906	0	0.203509	0.0705648	0.190027	0.100695	0.122587	0	0
FvH4_4g36181			1.71933	3.91827	2.85489	0.46631	0.264282	0	0.842413	0.678655	0.380898	0.364855	0.817154	0.473056	0.0762327	0.327811	0.146299	0.235612	0.136965	0.590866	0.0630896	0	0.19145	0.150896	0	0	0.392826	0.672442	0.219347	0.33405	0.358379	0.35773	1.0041	0.364795	0.407894	0.12587	0.168642	0.374719	0.392347	0.310961	0.393467	0.164939	0.131314	0.203794	0.500937	0.270956	0.351838	0.187543
FvH4_4g36260		Protein prenylyltransferase superfamily protein	2.3134	2.58395	2.33718	1.86219	1.08471	0.533668	0.533977	0.934339	0.920245	0.566891	0.559176	0.354684	0.945912	0.674208	0.306718	0.240688	0.0898568	0.156963	0.0865043	0	0.649545	0.363943	0	0.119011	1.11205	1.29695	1.24764	1.29144	1.07584	0.805057	0.111062	1.28207	0	0.0960148	0	0.522939	0.633708	0.146912	0.0958472	0.530767	0.668639	0.335266	0.304697	0.205655	0.205677	0.221673
FvH4_4g36630		Tetratricopeptide repeat (TPR)-like superfamily protein	2.00434	2.59727	3.26532	1.36991	1.68161	1.25074	1.1544	0.901871	1.29791	1.00031	1.58736	1.32412	0.881672	0.87464	0.538038	0.329758	0.755493	0.450893	1.26193	0.792144	1.22554	1.03232	1.74112	1.68569	1.18496	0.789044	0.973458	0.841832	0.879264	0.891571	0	1.5955	1.3232	0.762764	0.950914	1.01095	1.26442	1.09962	0.745385	1.10402	0.455965	0.505713	0.18169	0.567577	3.70168	1.38712
FvH4_5g00650		Calcium-binding EF-hand family protein	462.469	427.672	303.881	125.514	134.823	221.91	231.151	105.196	229.397	247.439	227.511	243.475	244.61	242.573	246.227	245.358	228.325	256.438	245.338	112.069	116.389	131.174	94.2406	300.382	221.157	227.911	203.612	221.07	221.942	216.282	175.778	171.29	146.534	95.4106	162.41	219.387	227.711	150.076	149.068	125.329	215.716	209.094	215.004	239.762	277.915	194.877
FvH4_5g04950			56.6564	13.6024	15.5688	0.913869	0.271946	0.0483792	3.99164	0.948575	6.93842	4.03707	12.2093	6.36469	9.77796	2.11388	0.727393	0.182313	0.0407295	14.6343	17.3351	5.11705	2.32157	6.1504	0.141372	5.71867	2.61826	1.34067	0.168907	0.159994	0	0.0531643	0.0503413	0.474933	2.94942	2.39807	0.118909	5.66875	2.83232	0.326442	0.459289	0.326365	0.0559532	0	0	0	3.96928	2.36307
FvH4_5g05381			22.8877	30.9397	28.4017	8.38568	11.0386	13.5404	9.31419	7.52665	9.61158	9.55238	9.87972	11.6964	11.3528	11.6273	9.72361	11.06	7.72701	7.93211	6.18611	3.18474	5.38475	7.36617	11.9898	15.6592	7.17307	14.3082	14.2758	9.44979	11.2749	13.6876	16.1071	6.93053	13.9051	9.59777	17.341	5.54089	4.84963	3.90428	5.53878	10.0961	13.8937	15.0137	17.6753	19.6691	17.5858	10.4519
FvH4_5g05970	LOB	Lateral organ boundaries (LOB) domain family protein	20.3459	21.7232	16.1969	0.735007	0.241776	0	2.93322	0.289598	0.364167	0.391571	2.85037	0.711816	0.999903	1.16327	1.56335	0.76699	1.98756	0	0.246038	0.326364	0.131252	0.191527	0.0452788	0.959902	0	0.263736	1.18443	0.491641	0.228944	0.202596	0	0.0390473	2.13493	1.30471	0.17489	0.0541237	0.13449	0.42996	0.413519	2.50386	1.71797	1.09152	1.14533	1.38755	2.29801	1.21465
FvH4_5g06574	CYP71A25	cytochrome P450, family 71, subfamily A, polypeptide 25	2.5553	2.70883	2.16206	0	0.0464628	0	0	0.298521	0	0	0	0	0.0400749	0.0768626	0.366186	0	0.0751002	0	0	0	0.0528954	0	0	0.150965	0.236709	0.0359377	0	0.0402764	0	0	0	0.137948	1.57742	0	0.913762	0.314477	0.274072	0.442344	0.815818	1.01573	0.230731	0.13735	0.327988	0.143906	0.0831676	0.048485
FvH4_5g07360			9.16263	8.16881	10.6371	1.75798	3.07287	1.87425	1.64509	5.4495	1.77869	1.49956	1.76876	1.75931	1.34069	0.707451	0.752283	0.744517	0.797794	0.684748	1.04321	0.47133	0.762451	1.17722	1.69902	1.83019	1.65255	1.20064	0.900331	0.483968	0.587765	0.939936	3.27006	1.95965	0.872879	0.923348	1.02843	1.15502	1.21564	0.723038	0.874487	0.934615	1.22719	1.28468	1.22218	1.14077	3.70949	2.52357
FvH4_5g07361	EMB2423	embryo defective 2423	17.7286	6.9208	12.0913	4.96484	5.45842	2.91624	3.97479	5.31258	6.3388	2.4242	5.31498	3.88721	6.98739	4.72116	3.18902	2.03025	2.51186	0.358039	3.55613	1.69034	3.06388	2.22959	1.99748	7.89681	2.65813	6.58044	3.75312	3.19206	2.42052	3.43471	0.0324489	3.51792	7.49937	2.15687	2.05093	5.82813	4.98517	3.68278	2.86523	3.78793	2.3021	1.81724	1.82361	1.73042	9.24438	4.40451
FvH4_5g07410	AtELP3,ELO3,ELP3,HAC8,HAG3	radical SAM domain-containing protein / GCN5-related N-acetyltransferase (GNAT) family protein	17.917	21.0252	16.7886	4.71923	4.30095	2.32471	5.87805	5.78862	7.15292	5.5131	5.24041	6.74167	5.02285	3.42283	1.59877	2.21426	1.65848	8.28972	3.67635	0.714398	2.12508	2.14196	0.745819	3.41279	6.1309	5.78443	5.06737	2.4251	3.45085	2.28327	0	4.75073	2.6101	0.983177	1.35229	2.90331	2.23533	1.84269	2.46845	3.02831	2.44273	2.43654	3.06448	2.71891	7.79517	3.42431
FvH4_5g07460	EMB2423	embryo defective 2423	20.0536	13.3613	17.7377	10.4084	8.66959	4.78408	12.3782	10.5645	12.8076	6.92694	12.6412	9.25439	9.92345	4.65369	3.6474	2.28982	2.49365	0.76174	8.10176	3.29596	6.56646	5.81647	3.9597	13.549	7.25136	8.54134	4.37783	2.51469	1.9776	3.51489	0.136945	6.79192	6.53225	5.05989	3.98178	10.5601	8.86213	7.51352	8.0345	7.53119	2.56002	1.78886	1.92289	1.65902	13.0902	6.88407
FvH4_5g07480			6.87203	7.72651	7.54892	1.83184	1.55083	2.90875	1.59633	3.05829	1.87854	1.61407	1.44349	1.70698	1.35512	0.786226	1.0766	1.19293	0.597996	0.335051	1.26259	0.587856	1.24315	0.701374	0.749747	0.811684	0.930912	0.870909	0.816857	0.482283	0.712618	0.965808	5.6078	1.21537	0.801326	0.492651	1.53101	1.32608	2.03776	1.29355	1.87882	1.49432	1.28857	1.20778	1.65841	2.11191	3.3231	2.31264
FvH4_5g08270		RING/U-box superfamily protein	9.73025	7.0931	10.8667	1.03852	0.686026	0.890525	1.985	2.21047	2.24215	0.989717	1.84688	1.44688	1.32393	1.90963	1.13128	0.458999	1.26741	0.716488	0.660263	0.598862	1.15229	0.909349	1.86579	2.57033	1.22931	1.26611	1.76699	0.95107	1.30417	0.717939	0.948349	2.23123	1.39022	1.72955	2.14984	1.19353	1.12689	1.62734	1.44385	1.78551	0.528303	0.502704	0.754067	0.942028	6.59953	3.81317
FvH4_5g09163			9.03934	9.55653	9.54279	5.03032	4.07209	4.73214	5.62717	8.44471	4.9557	4.81653	4.54861	5.11525	4.69878	5.00805	3.3726	2.4829	3.06576	2.01292	1.71391	1.86496	4.27728	3.92166	3.75788	3.70586	5.22732	4.25978	3.71393	3.45915	2.63323	3.68932	2.12107	4.71283	2.86091	6.16094	4.38442	3.9586	3.13033	3.77494	3.42963	4.27708	3.4945	3.9641	3.56225	4.00768	8.17589	4.73426
FvH4_5g09240			9.3403	13.3205	10.6454	4.52909	4.5162	3.61603	4.41417	8.27472	4.39773	4.07624	3.57755	3.53974	3.51619	3.79128	3.07499	2.87858	3.45739	4.39777	3.19512	1.62699	3.6342	3.38236	2.88704	3.29292	4.24845	3.4591	3.13372	3.1894	2.87363	3.62848	2.19129	3.93571	3.15839	4.17368	3.87079	3.20707	2.68379	1.97944	1.98365	2.60395	3.38906	4.60762	3.67595	3.82964	8.0069	7.38146
FvH4_5g09640			3.36153	13.2368	2.74094	0.78757	1.53714	4.61063	4.98969	1.37907	3.46237	0.789423	2.87104	4.11845	0.024669	0.0146914	0.0222966	0	0.0462296	1.41619	2.51649	1.24464	0.769663	1.18624	1.24787	0.832676	0.813304	0.0534959	0.105692	0	0	0	1.43756	0.557332	0.389094	0.253283	0.384086	0.0489356	0.0417467	0.171668	0.224921	0.239647	0	0.0232657	0	0.0196855	0.260523	0.0837736
FvH4_5g09660	LFY,LFY3	floral meristem identity control protein LEAFY (LFY)	47.4102	341.729	58.0983	0.417707	0.113016	0	1.9393	1.1604	13.2198	0.0742164	78.409	106.238	0	0	0	0	0	3.1369	2.83716	0.343441	0.032325	0	0.0212176	0.0307521	0	0.0219619	0	0	0	0	0	0	0.315626	0	0	0	0	0	0	0.0324434	0	0	0	0	0	0
FvH4_5g09670		Tetratricopeptide repeat (TPR)-like superfamily protein	6.76282	7.47797	6.65272	2.73659	3.47056	4.79084	3.07795	3.05233	4.56417	2.09098	6.31137	4.78573	4.60531	2.60191	1.59965	1.52341	1.45725	0.700569	2.08287	2.65306	3.39192	2.89795	4.09785	1.71131	2.58826	3.45435	3.55196	2.09177	2.37633	3.28801	0.0177049	2.91583	3.77765	2.68588	3.60956	1.63712	2.19967	2.16968	2.18676	3.19507	1.37383	1.10804	0.900657	1.02993	2.41935	0.995435
FvH4_5g10540			34.5002	19.9428	31.1112	16.1126	11.9891	8.85446	12.915	15.4335	16.0725	8.69829	13.9433	12.6547	15.1735	7.63497	4.30163	5.35503	4.53447	1.35072	9.43628	3.61613	7.70695	9.81968	8.36084	18.2335	14.5572	12.1554	8.10414	4.90482	4.99813	5.6973	1.10514	11.6778	8.6425	14.9714	12.8485	12.6726	10.5073	7.75907	9.1779	10.5209	4.92665	2.9575	3.65706	5.52033	29.6625	16.7651
FvH4_5g11892			37.9546	22.6407	29.9471	5.70925	6.77901	3.82748	6.30101	4.4491	11.282	6.33288	10.8986	8.94725	9.01928	4.97078	2.50636	2.67362	2.13117	15.6206	18.0482	1.37713	7.97393	6.19478	2.42664	8.11402	8.38403	6.64498	4.28888	3.77708	3.19464	3.15989	0.111576	6.76591	5.73706	4.26383	2.6538	8.24868	7.35396	6.11258	4.05356	3.37843	5.01136	6.40946	7.51705	5.97209	19.0829	9.06033
FvH4_5g14060			192.234	201.213	160.363	57.8153	57.9231	55.2055	50.4662	43.7448	62.4897	70.1371	56.0204	65.6602	53.7725	58.3319	61.4694	76.0301	58.6102	135.183	92.4794	30.6113	52.0059	82.5487	42.3772	52.719	56.0209	48.9468	58.5683	52.6594	64.9613	50.6423	0.595412	63.8414	28.4692	36.279	28.3461	44.551	59.4865	42.9731	42.232	39.1509	74.284	80.2982	99.3815	84.1705	143.086	115.159
FvH4_5g14661	AtMYB106,MYB106,NOK	myb domain protein 106	7.87801	5.34803	0.532282	0	0	0	0.117477	0	0.0628586	0	0.323729	0.0540949	0	0	0	0	0	0	0.0263865	0	0.202227	0	0	0.0400357	0	0	0	0	0	0	0	0	0	0	0.106694	0	0	0	0	0	0	0	0	0	0	0
FvH4_5g17670	KNATM	KNOX Arabidopsis thaliana meinox	121.242	32.6685	25.3236	0.151839	0	0	1.6325	0.652152	17.6301	1.24575	51.2805	41.5535	0.441865	0.474864	0	0	0	1.35153	8.39342	0.397164	0	0.166204	0.0545595	2.92175	0.0474633	0	0.0453	0	0	0	0	0	0.605063	0	0	0.374768	0.217542	0	0.133646	0.361492	0	0	0	0	0	0
FvH4_5g18020	ACD1,ATACD1,D-CDES	D-cysteine desulfhydrase	1.53921	1.48466	2.12678	0.119145	0	0.93247	0	0.554559	0	0	0.062496	0.171081	0.106726	0.102349	0.108357	0	0	0	0	0	0.408898	0	0	0.134014	0.102881	0	0	0	0.172944	0	0.217021	0.0797386	0	0	0	0	0	0.14267	0	0.0801112	0.052506	0.144296	0	0.416063	0.082596	0.0157879
FvH4_5g19752			5.6451	3.89595	4.58593	0.64628	0.654564	1.18049	0.461838	0.712295	0.314085	0.411922	0.78953	0.719476	0.502563	0.0963683	0.088284	0.0552754	0.0647581	0.18361	0.321069	0.118933	0.269238	0.149335	0.270218	0.683392	0.613259	0.388759	0.164225	0.0425378	0.0729784	0.0906238	1.82743	0.616525	0.149343	0.299964	0.217335	0.306484	0.367418	0.0665908	0.279918	0.185145	0.0687822	0.0193736	0.100714	0.0652955	1.68106	1.01926
FvH4_5g23240	HSP21	heat shock protein 21	2.56996	0.400676	0.183552	0.172727	0	0.178627	0.126935	0	0.122469	0.085036	0.0807712	0.226345	0	0	0	0	0.125002	0.23268	0	0.163309	0	0.0880227	0.828271	0	0.257202	0	0	0	0	0	0.14175	0.119849	0	0	0.111608	0.138158	0.112881	0	0.283118	0.100139	0	0	0	0	0.0826604	0
FvH4_5g26401		Ribosomal protein L36e family protein	54.8889	78.78	59.9294	0.101971	0	2.5869	0.629659	0	0.0962287	0.126315	0.927441	0.566815	0.277046	0.108795	0	0.211265	0.0785235	0	0.302375	0	0	0.0602678	0	0	0.156895	0.344776	0.304701	0.0918012	0	0	1.40559	0.150304	0.237991	0	0.101033	0.622186	0.318726	0	0.167517	0.0605025	0.107874	0	0.0417443	0.0364447	45.0856	50.0079
FvH4_5g26770			33.8959	21.6257	30.6841	7.84139	8.15013	6.66816	9.99957	7.86057	11.2749	6.28022	11.7171	10.3866	9.29647	5.88394	4.03078	2.41925	2.09288	4.02165	4.53598	2.08812	5.42706	4.24294	5.62802	10.2071	9.16751	8.36238	6.33011	3.5663	3.9184	4.43813	11.464	7.18834	5.16473	9.27637	9.00624	11.6328	7.27556	8.91412	6.20635	8.3299	3.19595	4.35963	4.32461	4.59983	28.5803	19.346
FvH4_5g26940		TLD-domain containing nucleolar protein	66.6749	61.5026	85.4784	8.64653	8.04712	13.0655	13.1987	8.25369	20.5241	21.8717	19.0401	17.4641	31.9917	28.2158	31.2496	37.8811	25.5249	11.2906	11.6995	9.17935	17.1647	14.0759	14.4475	17.707	21.0429	31.7877	26.3489	34.5293	35.7553	30.6292	19.0753	25.5786	2.59612	17.7444	8.4222	18.0244	25.7582	13.0284	9.06905	7.1184	30.0732	31.7869	34.2029	30.5959	29.6169	12.9997
FvH4_5g26970		TLD-domain containing nucleolar protein	49.6695	44.6579	57.9014	5.29718	4.49802	9.04626	7.06194	3.84584	12.9765	12.3308	8.41188	11.3029	16.9702	16.8645	14.2802	20.2116	15.8795	6.04073	5.72615	4.96234	12.4253	8.76665	11.5151	7.74574	14.7269	18.2022	14.7411	17.0895	17.1056	19.2923	1.6456	20.484	1.22968	16.5438	7.89519	11.1374	13.5284	8.00648	5.96074	5.41336	22.596	26.6336	25.6895	22.5758	19.0289	9.4162
FvH4_5g28260			27.716	22.0691	24.8184	15.6624	12.6993	16.2488	11.0809	12.2362	11.9112	13.4306	11.2621	11.4338	11.1189	9.17359	6.03022	7.63543	6.3743	7.40961	7.95976	5.01217	14.1728	13.6812	13.4076	12.8561	9.79993	9.6739	8.28148	9.3268	10.1194	10.1412	4.67972	13.5955	11.4798	12.3399	9.8748	12.0509	13.2495	13.2239	10.8719	10.9414	8.42052	11.0451	12.1651	11.6659	20.5239	15.1511
FvH4_5g28360	RPL10B	Ribosomal protein L16p/L10e family protein	15.2994	18.9178	14.1397	1.29608	2.77847	4.7929	1.79409	2.50993	1.72025	1.45926	3.14208	2.79613	0.746103	0.127112	0.313549	0.285704	0.253118	1.17971	2.56141	1.04309	1.79919	0.900946	0.476839	1.15576	2.36214	0.790713	0.18774	0.166266	0.408909	0.257394	3.46626	1.19089	2.54496	1.24029	0.564594	1.26142	0.641331	0.560181	1.09411	1.08142	0.189099	0.154297	0.201635	0.12761	0.922995	0.870507
FvH4_5g28490	RPL10B	Ribosomal protein L16p/L10e family protein	5.56781	6.01152	5.93125	0.429889	0.727202	1.1228	0.541799	0.306297	0.118878	0.123338	0.277707	0.26302	0.43488	0.0844938	0.150835	0.0912952	0.107428	1.06992	0.34762	0	0.145516	0.535767	0.321543	0.237528	0.118474	0.63018	0.159361	0.163779	0.063681	0.0541209	0.824316	0.0646655	1.01843	0.281024	0.196156	0.226987	0.173124	0.107768	0.274905	0.0520603	0.073488	0.106265	0.165717	0	0.636557	0.65228
FvH4_5g29781			12.543	8.75197	11.3621	3.76092	3.37307	6.30525	4.5421	4.55912	5.20267	4.32362	3.96721	2.80921	4.73432	4.00521	4.66648	3.16676	3.33551	0	2.15328	3.65277	5.10396	4.45931	3.3877	7.24735	6.32917	5.19626	3.2074	3.03871	3.41303	4.39583	0	6.15494	2.86218	4.9016	1.67826	3.04303	4.56345	2.92072	4.08168	3.92592	3.08917	4.45109	4.13129	4.67238	19.0781	7.44055
FvH4_5g31120	MAP2B	methionine aminopeptidase 2B	68.1276	58.422	67.0285	34.0131	33.7786	29.3423	45.0923	28.1557	45.59	25.715	48.791	43.5125	33.3878	34.0321	27.548	25.1585	25.2857	26.8884	45.6914	18.18	28.9613	29.0826	22.2997	29.376	30.1616	31.9785	30.0138	25.9996	25.6265	26.739	0.63435	32.1994	25.5158	21.4026	25.1668	32.431	30.6593	22.1763	21.828	21.1757	24.5421	24.8775	21.3827	24.7392	71.7309	61.2619
FvH4_5g31441	ATRPS5B,RPS5B	ribosomal protein 5B	2.02525	2.91003	2.20411	0	0	0.0817811	0	0	0.120416	0.0455316	0.0369796	0.0709917	0.122156	0	0	0	0.0525067	0	0	0	0	0	0	0.299627	0.117755	0.0547726	0.0579374	0	0.0445936	0.102806	0	0	0.159138	0	0.118656	0.115814	0.157175	0	0	0	0	0.0249756	0.0900796	0.0238109	0.145641	0.111651
FvH4_5g34210		Disease resistance protein (TIR-NBS-LRR class) family	7.74065	2.34534	4.03029	0.266427	0.0512743	0.180018	0.480966	0.304792	0.788613	0.469425	2.73975	1.79	0.162419	0.0567197	0.00807391	0.0068566	0.0160496	0.769444	4.85163	1.48776	0.586731	0.548714	0.1853	2.07493	4.22881	0.234717	0.05522	0.107137	0.057902	0.0173143	0.0189833	0.891495	0.592886	0.172216	0.240048	0.74282	0.200892	0.195362	0.159387	0.229965	0.00747227	0.0146113	0.00847403	0.0139299	5.62587	5.27004
FvH4_5g34590		Leucine-rich repeat (LRR) family protein	2.40755	1.68747	0.989199	0.0758802	0.067279	0.0784721	0.229788	0.779404	0.115543	0.102891	0.0709666	0.0313154	0.0586067	0.0349026	0	0	0	0	0.0485024	0	0.069828	0.0386689	0	0.14032	0.0441711	0.0635457	0.153344	0	0	0	0	0.0526505	0.0722575	0.622859	0.113855	0	0.249994	0	0	0.0388195	0.0692138	0.0184243	0.0267839	0.046231	0.383801	1.05399
FvH4_5g35210	PIRL9	plant intracellular ras group-related LRR 9	73.9428	73.4861	66.7317	37.1288	36.8707	42.4161	53.0982	43.4097	49.0197	46.7361	51.206	50.8178	37.8622	41.1101	43.267	42.7529	37.6633	39.2919	37.3519	24.8696	36.1325	37.0502	33.9293	46.2231	40.8282	34.5952	46.5282	39.8658	41.9612	39.8807	9.83245	40.6354	37.4723	27.8856	30.4414	33.0915	37.0109	44.34	49.018	41.8329	35.9206	38.3871	31.1883	40.7451	53.8553	28.2049
FvH4_5g38700	ARF17	auxin response factor 17	4.0498	3.57063	2.95207	0.715761	0.76544	3.02932	1.13996	1.38985	1.88088	1.5946	2.00923	2.13266	1.97933	1.27264	0.958755	0.988084	0.681371	1.20913	1.036	0.341109	0.398507	0.326391	0.254982	2.45499	1.89514	1.66189	1.86702	0.887421	0.903141	1.17291	1.69257	1.21604	3.63255	0.335355	0.545297	1.54415	0.965925	0.569874	0.632386	0.858086	0.655169	0.580291	1.34954	0.694666	3.40207	1.35921
FvH4_6g00280			3.88546	1.6552	2.29039	0	0	0	0	0	0	0	0	0	0	0	0	0	0	0	0	0	0	0	0	0	0	0	0	0	0	0	0	0	0	0	0	0	0	0	0	0	0	0	0	0	0.0438888	0
FvH4_6g00310	NAP1;3,NFA03,NFA3	nucleosome assembly protein 1;3	3.78097	3.26636	3.01848	0	0	0	0.0283736	0	0.109502	0	0.140882	0.205171	0	0	0.0605523	0	0.0512712	0	0	0	0	0.0393513	0	0	0	0.182818	0.113148	0.0471544	0.0435443	0.130811	0	0.0445598	0	0	0	0	0.155561	0	0	0.0842726	0.0205468	0	0	0	0.450764	0.218789
FvH4_6g02711			2.54075	1.32915	2.07167	0.100166	0	0.0916208	0.362687	0.401022	0.600893	0.157523	0.320595	0.552582	0.363351	0	0.162193	0	0.0771337	0	0.174073	0.340635	0.546049	0	0	0.316986	0.394728	0	0.0645424	0.161117	0	0.0732266	0	0.765356	0	0.0657284	0	0.433187	0.237164	0.12611	0	0.126782	0.0750534	0.0282071	0.0410054	0.246493	1.15314	0.601447
FvH4_6g03230		copper ion binding	15.2499	11.484	12.104	8.1304	5.42921	4.6575	6.4637	6.08441	8.75912	3.62197	7.08484	6.45703	8.15333	3.23163	2.35852	2.13395	1.95183	0.868283	3.70566	0.909331	3.47878	3.97134	3.83973	8.40563	4.33681	7.07761	4.12956	3.34042	2.8468	3.39023	0	6.17337	2.62548	3.1188	2.78254	4.92804	4.16945	3.49302	3.01329	3.91165	2.89263	1.70056	1.87777	2.98164	9.16801	5.17304
FvH4_6g03240		copper ion binding	36.1917	23.5866	26.1157	13.4264	10.369	8.43163	10.2973	11.1363	9.83322	6.45445	10.858	9.97687	13.0792	6.29102	2.10071	2.37735	2.88729	0.83314	5.25147	1.93303	7.46267	5.23997	4.82423	9.51075	7.65043	11.0666	7.93246	5.19047	4.32626	5.4661	0	11.8823	5.33235	4.56945	4.97934	8.05698	7.10698	4.39497	4.74792	5.64438	4.45849	3.87507	3.00723	4.90134	17.4886	10.5711
FvH4_6g03560			7.09651	7.20226	7.68404	1.52222	1.74347	1.31595	3.2523	2.49432	1.94082	1.99892	2.44544	3.36618	1.67194	1.49538	1.20505	1.2585	1.53549	1.7622	2.65217	0.63165	1.78686	1.80476	0.757657	1.36156	2.95193	1.7619	0.780371	1.07343	1.24165	0.91485	0.212351	1.72058	0.87794	0.560162	0.881541	1.78502	1.22789	1.34856	1.02528	1.25146	1.19032	1.24563	0.730169	1.09832	1.70124	1.38149
FvH4_6g05110		RING/U-box superfamily protein	25.3259	18.3902	17.2761	9.9652	8.65229	7.47489	11.5231	13.1373	11.3249	10.5544	10.5347	11.7722	7.94027	6.98571	7.57199	6.44059	8.0082	6.94553	7.60817	5.97142	9.33603	9.86109	8.15051	9.10872	7.51513	8.10687	6.90948	6.7563	6.60711	7.34486	3.62267	8.40408	9.3917	8.94475	10.6409	7.45115	7.74005	5.95716	8.16784	8.02711	5.73506	7.06845	6.63173	6.72445	14.7336	13.7201
FvH4_6g06070	ANAC098,ATCUC2,CUC2	NAC (No Apical Meristem) domain transcriptional regulator superfamily protein	18.301	81.6506	83.3757	2.49411	2.68983	0.0317581	25.7154	4.80687	5.12294	0.595407	27.1761	13.1666	0.125947	0.0298255	0.0912627	0.120314	0.216297	12.8143	1.42787	0.234217	0.152219	0.0410413	0	0	0.0937619	0.0278903	0.0223721	0	0	0.0602815	0	0.0464734	0.0766905	0	0	0	0	0.043713	0	0	0.105604	0.152612	0.167109	0.110828	0	0
FvH4_6g06330	ATCKX6,ATCKX7,CKX6	cytokinin oxidase/dehydrogenase 6	54.7354	175.846	65.8534	1.82861	0.153148	0.136226	10.9304	1.58028	4.666	1.11988	6.56756	3.8666	4.72881	4.23123	0	0	0	0.866027	1.21808	0	0	0.0880227	0	2.76969	0	2.88212	5.93401	0	0	0	0	1.15693	0	0.122545	0	0.252961	0.691269	0	0	0	0	0	0	0	0	0
FvH4_6g07030	MTSSB	mitochondrially targeted single-stranded DNA binding protein	20.0821	19.9295	20.1877	2.30169	4.41344	1.11586	6.11756	2.76849	4.19756	2.86185	5.07356	5.46677	2.76609	3.17795	2.87165	2.09578	2.80858	8.65229	6.5331	1.73741	2.73001	1.94915	0.875857	3.03201	2.99043	3.68414	2.31485	1.97431	2.26839	2.77899	0	2.46629	1.86878	0.974234	0.60931	2.76433	2.38382	1.36599	1.02462	1.43821	2.00848	2.18619	2.72589	2.53262	8.29319	6.07654
FvH4_6g07520		Pectin lyase-like superfamily protein	7.95359	13.6152	10.8732	2.00391	1.24461	1.05223	1.33375	2.51013	2.25626	2.27257	3.06724	2.45336	2.73948	2.61593	3.87649	6.37242	3.78038	5.6059	1.30769	0.173869	2.8771	5.02402	1.59406	4.88674	2.00455	1.97054	6.57842	6.05968	4.63403	3.99243	0.131253	2.8714	1.24223	1.46344	0.787874	0.780835	1.41042	2.0529	2.99995	1.89222	4.51016	3.20558	6.36894	3.84026	3.04336	1.04742
FvH4_6g07950			71.7329	67.1047	38.0003	1.47659	0.548221	0.126875	6.04851	1.29977	7.38266	0.815907	3.73182	3.58936	17.0547	1.68919	0.909242	1.60784	0	0.922683	1.28427	0.365612	0	0	0	1.40562	0.619474	13.2352	4.15563	1.66088	0.998922	0.898966	0.0919994	0	1.79211	0	0	0.294392	0.407507	0	0	0	0.703961	0.223525	0.13975	0.149495	0.0601192	0.0298016
FvH4_6g08190	ATRL6,RL6,RSM3	RAD-like 6	164.688	318.625	20.6697	14.1069	4.64602	0	18.0718	50.7187	0.464861	1.64753	11.7096	3.21047	1.76842	1.16983	0.585342	0.0904912	0	0	0	0	0.140468	0	0	2.86414	3.11193	2.14139	0.50511	1.56722	0.400977	0	0	1.32232	0	0.302956	0	12.3967	0.818638	0.480904	0	0.234271	0.0406158	0.192835	0.165717	0.141117	0	0.0872006
FvH4_6g08330			422.192	1393.71	235.143	4.58913	1.266	0.0507508	36.8628	6.98085	19.2664	4.4621	40.41	11.1757	0.998945	0.58849	0.0953812	0.154118	0.042726	0.310587	2.29461	0.25569	0	0.0327928	0	6.73367	0.122828	0.0538892	0	0	0	0.0405618	0	0.0371332	0.327208	0.310333	0	3.04326	2.49121	0.678057	0.0455744	0.11192	0.058696	0.0765944	0.138002	0.117162	0	0
FvH4_6g09210	CDKB1;2	cyclin-dependent kinase B1;2	3.83928	5.42454	3.85773	1.89412	0.308329	0	0	1.12464	0.0936964	0.0566906	0.10416	0.0516869	0.179347	0	0	0	0	0.577352	0.345092	0	0.117391	0.133625	0	0	0.0857342	0.17619	0.0639763	0	0.14412	0.294868	0	0	0	0	0	0	0.0783613	0	0	0	0.043755	0.036368	0.0874457	0	0.612023	0.35327
FvH4_6g11070	APTX	APRATAXIN-like	22.0201	25.1384	5.17933	0	0	0	0.0241176	0.224728	0.0534069	0	2.90926	0.110725	0	0.466179	1.76374	0.431653	0	1.26482	0.140306	0.0652009	0	0	0	0.121377	0	0.0909224	1.12405	2.61137	1.17897	0.196518	0	0	0.0625027	0	0	0	0	0	0	0	0.0523944	0	0.224298	0.0202268	0.167294	0
FvH4_6g13991		Ribosomal protein L36e family protein	1916.17	2421.35	1810.88	259.888	296.162	155.26	568.129	217.793	436.364	271.453	558.697	504.078	365.814	319.52	251.027	257.751	230.403	1403.85	798.413	118.922	273.492	192.941	96.5674	273.227	371.314	341.375	236.685	201.499	209.091	193.848	1.38885	344.49	167.078	110.631	107.564	330.29	290.299	121.343	87.3556	80.7796	255.691	254.465	300.927	251.506	754.913	889.429
FvH4_6g14761	ATRPS5B,RPS5B	ribosomal protein 5B	4.09498	4.61239	4.42281	0.0519208	0	0	0	0	0.0426956	0	0	0.0248512	0	0	0	0	0.0799643	0.0811178	0	0	0	0	0	0	0	0	0	0	0.0679131	0.448359	0	0	0	0	0.0389091	0.0481651	0	0	0	0	0	0	0	0	0.393993	0.0999363
FvH4_6g15640			8.14152	7.34724	6.24471	1.84431	1.72863	4.51633	1.78528	3.62273	2.04864	1.37734	2.77852	2.56968	3.04138	1.4158	0.932212	2.03298	0.850607	0.327475	0.364264	0.701168	1.36637	2.18812	0.885589	3.3386	3.76804	1.52303	3.98506	2.73746	2.00943	1.92495	7.67033	3.84947	2.72995	1.06758	1.45903	3.40139	3.09724	1.28077	2.28253	1.46745	1.26576	0.442911	0.80475	1.41478	5.51793	1.20595
FvH4_6g15641			14.2167	19.5808	16.6884	3.64168	3.98794	6.51056	3.61576	3.26917	4.87441	5.24822	6.57641	5.94693	5.61875	3.57086	3.50943	4.8244	2.20197	2.00251	0.400572	1.37771	2.91655	2.90335	3.6786	6.35373	6.42678	4.63515	4.91536	4.40149	4.07323	2.95516	12.1832	6.71608	6.53945	2.84108	3.49634	4.41058	4.63805	2.13878	3.14391	3.9948	1.81482	1.45766	1.83532	2.50231	15.0675	4.58897
FvH4_6g16020		lysine decarboxylase family protein	126.677	91.2778	106.351	9.64502	3.8816	1.3585	65.3521	17.4124	17.7383	11.4816	55.5128	33.152	1.57988	3.07738	5.79167	4.76602	2.39767	7.52186	36.7523	4.28982	0.529709	1.06574	1.67468	5.2023	5.89183	1.08506	2.44009	5.85341	4.98632	3.21343	0	1.86144	12.89	0.0846676	0.421521	0.500796	0.237192	0.311205	1.04928	1.48149	1.1114	0.198584	0.996881	0.477667	17.1662	7.25762
FvH4_6g16343	CLV3	CLAVATA3	22.6105	63.8449	62.3773	0	0	0.134413	0.0477576	0	0.211513	1.54276	0.591823	0	0	0	0	0	0	1.45407	0.94246	0	0	0	0.14977	0	0	0	0	0	0	0	0	0	1.04622	4.12275	0.111036	0	0	0	0	0.0753521	0	0	0	0	0.502574	0.0922216
FvH4_6g16430			3.82347	0.318953	0.345449	0	0	0.606105	0	0	0	0	0.140311	0.0955854	0	0	0	0	0	0	0	0	0	0	0	0	0	0	0	0	0	0	0.543424	0	0	0	0.0484696	0.06	0	0	0	0	0	0	0	0	0.0547077	0
FvH4_6g16590			145.305	135.169	135.84	68.2965	77.1703	123.928	79.2485	84.0855	94.7456	76.3082	83.8744	78.5842	98.8089	77.9819	69.4017	66.2958	51.5828	50.6019	72.1933	53.9809	73.8192	97.3232	84.4164	84.057	79.6466	78.5067	81.7705	72.9521	74.3623	66.2718	35.9805	72.2358	67.2291	108.91	97.9467	64.1669	68.0739	46.0339	59.4055	67.2398	67.1783	62.4884	67.8036	67.7046	87.0069	80.488
FvH4_6g16670		Pectin lyase-like superfamily protein	50.009	41.3286	23.1557	0.970841	0.606356	0.0917985	7.11229	2.638	20.1281	12.5232	19.7727	16.7347	24.0281	9.1667	5.40511	3.12284	0.755182	7.96497	4.31689	1.10388	0.37006	0.0420518	0.0795635	20.3203	10.6962	21.0547	8.27241	10.4332	5.11821	4.72282	0.0377645	4.82054	4.41839	1.31068	0.108104	19.947	8.8577	1.82862	0.165092	0.150283	0.82502	0.373772	0.562746	0.393607	25.3304	6.79477
FvH4_6g17050	ATPCAP1,PCAP1	plasma-membrane associated cation-binding protein 1	142.972	64.98	132.424	48.0522	35.09	23.5382	49.935	54.6923	59.9508	26.2763	54.4786	34.0597	76.8064	19.4539	4.26156	4.03036	5.77315	2.86311	30.5481	16.0189	31.2831	45.6627	30.5053	77.5705	44.2071	57.9512	28.8854	12.8788	14.8856	16.3175	0.413026	55.1558	29.3063	49.7507	57.8456	42.6729	46.7329	33.0584	28.7103	41.4828	9.74214	7.10756	8.20093	15.0227	121.938	66.858
FvH4_6g17060			15.8903	11.8899	15.5921	6.7331	6.17526	5.86784	6.36988	7.23974	8.88285	4.56288	7.07148	5.99723	8.29245	4.72524	3.19084	1.85865	2.36266	1.25153	3.7781	1.75704	4.0133	3.85032	3.17738	8.3033	5.59478	4.97763	4.13343	3.29151	3.17027	2.64858	0.529409	6.83857	5.10976	7.07788	8.39726	5.08578	5.74645	4.51719	5.02018	5.34455	1.96883	1.75562	1.91653	2.46972	10.7859	7.93395
FvH4_6g18480	ATC	centroradialis	60.9265	0	5.5473	1.03636	0.614625	0	0.422544	0.492825	0.175342	0	1.52976	0.310121	0	0.191223	0	0	0.236249	0	0	0	0.211934	0.267251	0.209745	0	0	0	0	0.0703179	0.209055	0.344768	0	0	0	0	0	0	0.075254	0	0.107191	0	0.253825	0.492336	0	0.633859	4.47424	3.96423
FvH4_6g20040		Putative lysine decarboxylase family protein	12.4053	64.7416	31.1842	12.9754	6.05439	14.1518	13.4783	20.2361	2.11867	0.874088	15.6524	2.63927	2.96261	1.99249	3.40474	4.87366	2.19965	20.0837	5.26105	2.5338	2.71828	9.85029	17.8919	0.812128	1.69059	4.27637	5.63971	4.87235	5.68304	2.62854	1.03706	2.09949	8.28172	1.40827	7.1762	0.46357	0.512805	0.76775	0.915414	1.23384	2.08674	1.8838	1.26012	1.56736	23.197	2.5871
FvH4_6g22640	SPL9	squamosa promoter binding protein-like 9	89.1407	141.705	71.0255	2.47333	0.896436	0.477613	11.0034	3.28532	40.01	2.83113	28.7005	37.8969	12.5166	12.337	4.50609	2.2195	0.868017	2.23534	5.4841	2.31505	1.68436	1.09146	0.794296	15.1335	9.6882	13.6633	12.2311	9.88436	9.11222	4.58475	0	21.0647	1.19063	0.28962	0.0196955	0.923715	1.81238	0.61737	0.771019	0.741202	1.29991	0.716059	0.998766	0.940965	9.38012	0.84579
FvH4_6g23710			11.1754	11.3979	8.80991	0	0	0	0	0	0	0	0	0	0	0	0	0	0	0	0	0	0	0	0	0	0	0	0	0	0	0	0	0	0	0	0	0	0	0	0	0	0	0	0	0	0.567491	0.320042
FvH4_6g23730			11.1116	11.2054	8.75603	0	0	0	0	0	0	0	0	0	0	0	0	0	0	0	0	0	0	0	0	0	0	0	0	0	0	0	0	0	0	0	0	0	0	0	0	0	0	0	0	0	0.567491	0.320042
FvH4_6g24080			18.7253	8.23607	15.6087	4.29986	5.21937	9.5309	6.61759	7.32854	6.13927	5.20248	7.06405	5.22656	7.83232	1.88369	0.795671	0.554687	0.812623	0.122338	3.62655	1.86721	4.26091	6.66397	3.52296	11.4829	4.88993	6.6227	3.78416	1.87587	1.41417	2.3243	1.48245	4.54431	4.62613	10.1002	6.74768	4.24857	4.15856	4.3308	4.68178	5.60036	3.409	1.73663	2.05209	3.33849	19.5684	7.64739
FvH4_6g24620	ATCKX1,CKX1	cytokinin oxidase/dehydrogenase 1	2.23201	0.319043	0	0.165842	0.0428468	0.119673	0.136842	0.0688241	0.017047	0.127293	0	0.00992229	0	0.0534237	0	0	0	0.060273	0.16955	0.119416	0.0711453	0.274274	0.0920571	0	0.0179005	0	0.0133577	0	0	0	0	0.072178	0.239321	0.0306607	0.773106	0	0.0975182	0.0521994	0.0904918	0	0.0255894	0.00759333	0.0182579	0.0294665	0.00575292	0.0112766
FvH4_6g25090	BOP2	Ankyrin repeat family protein / BTB/POZ domain-containing protein	38.8614	57.7677	13.6608	0.492871	0.300956	0.0739733	2.73481	1.60227	5.82964	0.7941	11.2433	11.7553	0.602252	0.689964	0.185205	0.155132	0.110882	2.44044	4.42563	0.933049	0.1822	0.0527789	0.136669	0.900361	0.0795662	0.503767	0.358998	0.206883	0.0178051	0.0897606	0	0	4.09487	2.48434	5.18566	0.569084	0.138163	0.0815735	0.248874	1.02784	1.28985	1.14868	0.726154	1.56049	17.497	5.28763
FvH4_6g27021			10.4432	7.60553	8.90128	1.53607	1.00902	0.445802	4.36117	2.24154	2.84971	1.42612	2.32762	2.19845	0.85607	0.60117	0.522645	0.488086	0.388107	1.46634	1.26978	0.253085	0.323838	0.297565	0.24561	0.919578	1.66403	0.600882	0.484391	0.175021	0.163764	0.30081	0.0809055	1.36734	0.775572	0.318608	0.347688	0.54932	0.397713	0.336021	0.183797	0.262795	0.333884	0.34382	0.361466	0.48637	2.34058	1.17318
FvH4_6g27400	LSH10	Protein of unknown function (DUF640)	563.131	4.16199	19.7275	3.61731	3.39472	0.147902	5.00494	2.95167	79.7155	15.1993	40.2499	92.8571	27.935	160.058	112.761	72.933	43.0449	1.56936	1.1476	0.422697	0.612459	1.97123	1.00618	1.10665	2.10119	6.42756	85.7956	36.6711	25.2078	18.4205	0	1.75425	0.965907	1.31141	0.240992	23.3301	22.0646	9.49965	7.22285	7.85821	42.6483	22.1986	35.0071	47.7094	17.0813	7.07096
FvH4_6g29870			44.0264	13.3653	6.025	2.59728	2.08219	1.18941	3.62461	2.67253	9.17983	2.96637	8.79925	9.81586	5.81226	3.15188	1.06704	0.663907	0.550281	31.6974	1.56906	0.105182	4.70011	2.4815	0	15.9587	0.396071	1.13058	0.963794	0.80829	0.0765014	0.214749	0	2.92937	0.847495	1.25986	0.333845	1.4375	2.68335	1.51091	1.89778	0.842285	1.43746	0.813394	1.15301	1.61727	0.0745469	0
FvH4_6g31070			32.2058	19.2181	24.9871	7.0295	8.86874	4.98899	7.70264	7.87052	10.9001	4.63159	9.28246	7.31582	9.97659	5.17387	2.36721	1.85097	1.34313	1.8091	4.03951	1.81993	4.8866	3.92834	4.2494	9.54864	7.21314	8.25235	4.86454	2.46587	2.23049	2.00116	3.56248	7.15911	4.42138	5.90342	7.23861	5.85482	7.08992	7.17771	6.56351	7.49965	2.05137	2.05371	1.81397	3.29803	24.9231	14.9354
FvH4_6g33604			20.4122	9.78651	14.9304	0.226332	0.100339	0.178503	0.384564	0	0.861596	0.209162	0.308829	0.3392	0	0.104106	0.236997	0.0679824	0.0751389	0	0.217006	0	0.323647	0	0.0757249	0.0995174	0.300264	0.0783814	0	0.244794	0.438912	0.213998	0	0.235566	0.347702	0.192086	0.0966782	0.0905172	0	0.23969	0	0.239292	0.146225	0.288615	0.122859	0.170371	0.692267	0.163988
FvH4_6g34570		Ribosomal protein S3 family protein	78.6815	43.9167	56.9129	44.3653	38.6138	24.9257	39.6902	37.8092	45.0399	16.183	35.6458	33.3986	48.4976	26.7254	17.2241	18.1684	13.2744	9.89348	33.9586	15.5015	8.8711	19.1046	18.7991	37.635	7.82189	34.8826	36.5099	17.2142	17.9458	19.66	9.43136	14.2774	15.7132	5.87405	13.8614	24.7064	23.6444	25.3602	23.9626	26.5421	10.992	9.38864	9.03403	22.4944	51.0562	55.1968
FvH4_6g36720			2.61849	0.709065	1.25221	0	0	0	0	0	0	0	0	0	0	0	0	0	0	0	0	0	0	0	0	0	0	0	0	0	0	0	0	0	0	0	0	0	0	0	0	0	0	0	0	0	0	0
FvH4_6g37351			294.672	503.208	269.252	32.2954	45.691	116.064	120.61	80.4853	39.7222	108.559	54.2534	30.8443	27.7415	39.3701	54.3097	121.634	113.165	39.4061	79.9029	199.681	17.5106	41.3532	69.3148	32.2908	14.5415	12.7334	60.8278	92.6751	101.025	69.9228	171.567	18.0099	247.375	40.9162	79.3007	20.0931	52.0069	106.711	105.919	69.156	61.9414	65.6023	113.583	103.035	134.336	19.2617
FvH4_6g39362		ARM repeat superfamily protein	5.87115	3.2686	4.73321	2.76165	2.70927	2.54691	2.59912	3.3858	2.79875	2.21626	2.68444	2.6057	2.81386	2.56812	1.53609	1.32865	1.40687	0.664153	1.21678	1.14742	1.88821	2.37385	2.50011	2.09208	2.873	1.72623	2.47527	1.6063	1.45969	1.75886	0.575834	3.20112	1.73654	1.27682	2.51066	2.90868	2.06811	1.89321	2.41877	2.43529	1.51594	1.0435	0.892616	1.22322	3.59981	2.45163
FvH4_6g39560	GABA-T,HER1,POP2	Pyridoxal phosphate (PLP)-dependent transferases superfamily protein	2.76341	1.01687	1.31998	0.0700121	0.093423	0.155229	0.0128627	0.210732	0.0533041	0.017234	0	0.0157128	0.0545214	0.0322034	0.0488741	0.0210292	0.0760014	0	0	0	0.0356868	0.0178393	0	0	0.0203776	0.024246	0.10964	0.273909	0.0635526	0.0524047	0	0	0.0371105	0	0.0299058	0	0.0466991	0	0	0.0358175	0	0	0.0256481	0.0316208	0.685622	0.271832
FvH4_6g40845			6.53001	3.4823	7.04176	1.09827	0.649844	1.58078	0.736474	2.02287	1.02432	1.13798	1.39859	0.892327	1.88845	1.36935	0.265015	0	0.263894	0	1.47872	0.59789	1.39048	0.65375	0.582858	0.910082	1.10903	1.08066	1.13912	0.411376	0.304254	0.75657	0.190898	0.828336	0.862661	1.3776	1.38312	1.00371	1.05889	1.28723	1.36756	0.601073	0.378797	0.230331	0.227511	0.223883	4.38228	2.54754
FvH4_6g41620		NAD(P)H dehydrogenase subunit H	6.75262	3.72346	5.32276	1.65957	1.44508	1.92791	0.0380804	1.85951	0.57863	0.240984	0.0479325	0.13081	0.539805	0.0794493	0.0270892	0.0619846	0.0458743	0	2.16576	0.4705	0.0352172	0	0.023116	0.432422	0.432577	0.664302	0.0253095	0.047911	0.0864721	0.0598798	0	0.159477	1.85155	0.0195455	0	0.653816	0.667761	0.11067	0.0321574	0.0954296	0	0	0.0121937	0	0.0755186	0.0329031
FvH4_6g41980	MPL1	Myzus persicae-induced lipase 1	10.645	1.39472	4.55466	0.24281	0.155678	0.0460823	0.51772	0.368139	1.12063	0.904065	4.30469	1.53073	4.69304	2.97996	2.08192	0.802469	0.105714	0	0.199598	0.23077	2.01026	1.01885	0.954606	0.352486	0.915959	1.41259	1.81007	2.26418	0.824512	0.359094	0	1.18795	0.95588	0.136695	0.232608	0.782327	1.48336	1.20741	1.40054	0.884774	0.443069	0.144058	0.587142	0.566159	0.571942	0.0768722
FvH4_6g42570	BUM,BUM1,SHL,STM,WAM,WAM1	KNOX/ELK homeobox transcription factor	231.559	126.361	96.6974	0	0	0	0.303907	0	8.57959	1.10919	15.6464	4.19573	1.27547	0.489608	9.98494	13.5251	1.27697	13.1502	5.11697	1.63028	0.103997	0.084395	0.0662352	0	0.0635036	5.38644	3.69984	18.9446	16.3062	9.67118	0	0	0.723928	0.025799	0	0.0266275	0	0	0	0.0979736	2.04984	2.37546	3.8248	2.73298	0.0087011	0
FvH4_6g42680		ERD (early-responsive to dehydration stress) family protein	2.8329	1.92165	2.43542	0	0.136933	0	0.198424	0	0.109502	0	0	0	0	0.071037	0	0	0	0	0	0	0	0.236108	0	0	0.114985	0	0	0	0	0	0	0.214318	0	0	0.0997903	0	0	0.159455	0	0	0	0	0.113153	0.0465012	0.055359	0.037515
FvH4_6g42690		Acid phosphatase/vanadium-dependent haloperoxidase-related protein	4.45088	7.56677	5.61551	0.149174	0.133581	0.117649	0	0	0.105769	0.30621	0.137224	0	0.810317	0.11049	0	0.0884345	0	0	0	0	0.137276	0.0760196	0.371534	0	0	0.331567	0.301461	0.231589	0	0	0	0	0.158141	0.0844012	0.544044	0.228551	0	0	0.10565	0.58505	0	0.318899	0.105309	0.09194	0.205193	0.585902
FvH4_6g43250		Histone superfamily protein	23.6983	31.5236	29.7015	0.853938	0.53169	1.12429	0.219251	0.470985	0.892981	1.42152	0.47914	0.631817	1.39592	0.426826	1.66475	1.78166	0.836923	0.200951	0.414228	0.430262	0.549102	0.152039	0.0998192	0.407039	0.902669	1.11963	0.742265	0.455468	0.588838	1.15183	0	0.63742	0.616476	2.4945	0.254879	2.1662	4.38206	3.15956	1.57272	0.910648	1.09982	1.1773	1.86999	0.681118	0.23469	0.456389
FvH4_6g44670		Tetratricopeptide repeat (TPR)-like superfamily protein	7.1857	5.13823	6.70118	1.52392	2.05896	0.719439	1.70571	1.85504	1.62367	1.31369	2.17917	2.46906	2.23114	1.24471	1.37027	1.32188	1.14903	0.927015	2.13307	1.34649	1.09424	1.4366	0.656354	2.27861	2.30019	2.14559	1.02046	1.73374	1.84487	1.4422	0	2.18978	1.11621	0.222503	0.88999	1.74859	1.78946	1.28499	1.77717	1.59533	1.18053	0.934135	1.09607	1.46703	3.19549	1.06552
FvH4_6g45391	DVL3,RTFL21	ROTUNDIFOLIA like 21	101.361	130.679	76.8865	2.79241	6.24821	0.102506	7.18349	6.2284	15.6289	16.2193	29.3305	23.4385	35.9423	42.0308	20.0717	11.7766	1.34105	0.175086	0.776303	0.491543	0	0.0662349	0.386512	2.412	0.193538	20.2722	100.873	19.8648	10.0499	1.33129	0	0	1.98269	28.7729	0.612109	5.00471	1.9887	0.684771	0.426079	0	2.51964	1.66712	3.98697	4.12179	0.425225	0.258847
FvH4_6g45410	TCP1	TCP family transcription factor	0.861541	2.86904	0.214602	0.0714795	0.034033	0	0.0141039	0.098565	0.0272153	0.0110501	0.158597	0.0489107	0.0296461	0	0	0	0	0	0.106585	0	0	0	0	0	0	0	0	0	0	0	0.120567	0	0	0	0	0	0.0261204	0	0	0.0222531	0.014585	0.00931988	0	0	0	0
FvH4_6g46410	AGL8,FUL	AGAMOUS-like 8	22.6002	90.4023	38.7761	0.728164	0.316692	0.250604	1.58876	1.41583	0.160278	0.0689927	3.67892	0.396371	0.436179	0.23524	1.20182	0.910138	0.429713	0	0.0762413	0.0505433	0	0	0	1.36201	0.0378825	2.52328	3.62678	3.19605	5.11408	5.07933	0	0	0	0.165872	0.119812	0.0372579	0	0	0	0.0294983	1.26863	0.823174	0.7053	0.990557	11.782	2.93125
FvH4_6g48400	ATOPT3,OPT3	oligopeptide transporter	4.2099	2.48169	3.51545	1.09221	1.14356	0.334669	0.513883	0.896565	0.56874	0.297591	0.714265	0.281795	0.0709018	0	0	0	0	0.230133	0.234711	0.525157	0.262539	0.213053	0.184282	0.759759	0.365356	0.140459	0.0510021	0.0712583	0	0	0	0.0529732	0.282052	0	0.13774	0.415735	0.184932	0.393741	0.321375	0.187854	0	0	0	0.0848677	1.61918	0.486307
FvH4_6g49070			6.97068	6.71273	7.61506	0.287094	0.0716774	0.773017	1.78462	0	0.187015	0.0460869	0.146036	0.212678	0.311159	0.237149	0.0558774	0	0	0.107827	0.0511641	0	0	0.122373	0.145798	0.225651	0.0595957	0	0.117288	0.0488795	0	0.138746	0	0.11108	0	0.237943	0.0517206	0.058613	0.156932	0	0	0.0409499	0	0.0447156	0.0282537	0	0.380548	0.170575
FvH4_6g49870			1.89313	2.93062	2.1662	0	0	0	0	0	0	0	0	0	0	0	0	0	0	0	0	0	0	0	0	0	0	0	0	0	0	0	0	0	0	0	0	0	0	0	0	0	0	0	0	0	0.0985551	0.0901133
FvH4_6g49880			2.9758	3.10484	4.24732	0.0826185	0	0	0	0	0	0	0	0	0	0	0	0	0	0	0	0	0	0	0	0	0	0	0	0	0	0	0	0	0	0	0	0	0	0	0	0	0	0	0	0	0.175371	0.0451714
FvH4_6g52080		F-box family protein	5.00613	6.11294	6.1863	1.27287	1.10229	0.990601	0.993497	2.345	1.00327	0.889133	1.14049	0.961054	1.7959	1.9055	1.67187	1.35446	1.85408	1.13985	0.756726	0.420156	1.45614	1.30579	0.966042	1.01466	1.30229	1.25836	1.72876	1.0859	1.94237	1.38434	0.0274123	1.99915	0.463326	1.34872	1.32468	0.918926	0.938468	0.994023	0.93076	0.979699	1.21364	1.23723	1.22169	1.1703	0.0587017	0.039768
FvH4_6g52310		ATP12 protein-related	6.59144	4.23372	4.94109	2.25457	3.01506	1.43984	3.36198	2.04161	2.83922	2.09015	3.42985	2.6966	4.28741	2.97167	1.38984	1.11916	1.38278	2.15964	2.40285	0.761231	1.67496	2.08055	0.689361	3.53126	2.59227	5.03912	2.55641	1.10419	1.02667	1.6315	0	2.90122	0.810541	1.31413	1.36241	1.72123	2.26905	1.20538	1.51163	1.81032	1.62935	2.11188	1.76849	2.69699	4.58518	3.39154
FvH4_6g52380		Glycosyl hydrolase superfamily protein	15.3008	5.77696	8.55436	2.75113	2.25169	1.70795	1.56052	4.47998	3.92815	2.90909	4.44716	1.64976	2.88334	2.57963	0.865862	0.601293	0.924116	0.226714	0.107576	0.318242	2.23503	1.81038	2.03323	6.19823	2.95722	2.22008	1.98516	1.13919	0.800891	2.16143	2.2765	3.03265	0.837622	2.33669	2.199	3.20609	2.4515	3.89429	3.11617	2.86411	0.23663	0.106307	0.187211	0.155591	6.72352	3.11425
FvH4_6g52950			25.9787	6.61892	6.96556	2.17506	1.83416	3.16958	1.49588	1.70346	0.737588	0.911096	3.69417	3.29832	0.565262	0.110344	0.212629	0.127422	0.0567825	0.107196	1.81779	0.121285	1.32822	1.76478	2.3223	4.10513	1.07899	0.772721	0.157682	0.989129	0.631022	0.434615	0.105274	0.657126	0.738333	0.581018	1.01765	0.0968243	0.0849873	0.229822	0.119412	0.279994	0.0162478	0.0747838	0.0800366	0	1.23115	0.378785
FvH4_6g53571			3.70909	2.43636	2.74666	0.486109	0.593212	0.786748	0.644167	0.364169	1.0196	0.482072	0.696999	0.543971	1.08545	0.825353	0.812212	0.61158	0.284778	0.303309	0.697285	0.171587	0.580699	0.434939	0.359795	1.11868	0.918018	1.00064	0.825102	0.661178	0.378565	0.467103	0	0.559383	0.422818	0.497105	0.323987	0.83825	0.807011	0.377967	0.878941	0.290905	1.06689	0.699516	0.65157	0.644356	3.03568	2.85141
FvH4_6g53900	ROXY1	Thioredoxin superfamily protein	69.7447	34.9833	22.7565	0.194016	0	0	4.77314	1.37131	6.33482	14.1927	22.88	30.7	3.97485	0.886196	0	0.186115	0.150796	12.2171	4.7391	1.40899	0.722804	2.51265	0.588683	22.7487	0.734809	7.30072	3.10282	2.01643	1.21941	0.923473	0	0.27699	2.61511	0.354612	0	10.2382	0.833912	0.339296	0.193965	0.0604013	0.0554438	0.164522	0.31647	0.0963181	2.408	5.20707
FvH4_6g54251			0.753343	2.53248	1.8697	0	0	0	0.0499759	0	0	0.0820282	0.02736	0.054307	0	0	0	0	0	0	0	0.060093	0	0	0	0.111868	0.0802548	0.143221	0.11154	0	0	0.0524293	0	0	0.0641311	0	0.0516805	0	0	0	0	0	0	0.0382116	0	0	0.0839623	0.142157
FvH4_7g02300		Disease resistance-responsive (dirigent-like protein) family protein	68.7567	70.7186	48.2666	1.94048	1.14186	0.25869	9.53728	3.47602	28.6017	5.14774	9.7944	9.16187	11.2088	3.12178	0.940486	1.05894	0.145581	0.260186	26.6567	31.652	0.275274	0.500151	1.61955	58.8307	3.25542	14.1897	2.99314	2.58295	1.56733	0.668104	0	2.39348	11.4898	0.342205	0.0916992	3.11521	2.03041	0.597403	0.531285	1.46413	0.132166	0.0224106	0.161656	0.0656005	5.64687	0.19226
FvH4_7g03400	ATVDAC1,VDAC1	voltage dependent anion channel 1	1.05051	2.00418	0.862586	0.0984237	0.0511091	0.85228	0.0995099	0.048854	0.173818	0.0726287	0.0774407	0.0983468	0.132976	0	0.039843	0.306326	0.351292	0.143083	0.122005	0.164622	0.0525228	0.190635	0.142152	0.0553537	0.0664487	0.19119	0.0735257	0.272325	0.0321849	0.415969	0	0	0.284063	0.0404932	0	0.125381	0.111899	0.179816	0	0.0291991	0.511922	0.510146	0.535682	0.713064	0.391836	0.2994
FvH4_7g03440	DRP4C	Dynamin related protein 4C	36.3939	56.6302	34.6122	5.39806	6.46566	4.58764	2.89335	3.73671	0.516156	2.30449	5.03442	1.08296	13.6721	14.0951	7.2074	4.76766	2.53024	1.14681	1.00422	0.749852	1.48297	1.25754	3.66976	11.3331	2.03714	11.0977	12.7675	12.7301	7.61178	7.72095	0.0161032	2.94272	1.18462	3.9962	4.06949	3.84991	4.10602	3.72124	2.82755	4.14643	2.69363	2.83778	2.10877	2.61318	14.5995	7.04465
FvH4_7g03770	MAPKKK21	mitogen-activated protein kinase kinase kinase 21	8.31147	4.61619	7.37452	3.68818	3.1376	2.81693	2.62839	4.53386	3.24486	2.27323	2.78555	2.58975	3.09727	0.688669	0.113123	0.0668301	0.340017	0.178982	2.96248	2.72677	2.0749	2.21602	1.8582	5.17663	3.91759	3.10571	1.29163	0.491654	0.54776	1.07959	0.496353	2.42013	3.24416	3.16878	1.8199	3.96494	3.26298	2.5114	2.62489	3.02513	0.849807	0.455811	0.424596	0.429007	5.54837	2.30807
FvH4_7g04540	ATCPNIFS,ATNFS2,ATSUFS,CPNIFS,SUFS	chloroplastic NIFS-like cysteine desulfurase	9.33644	5.07388	6.92558	3.45548	2.9829	2.18907	3.66307	3.48493	4.68026	2.18849	4.65248	3.68213	3.14031	2.48531	1.58007	1.39567	1.94087	0.550561	1.80394	0.704057	2.13308	1.96414	1.17223	4.94757	2.89213	3.1515	2.33781	1.91438	1.34517	1.7174	0.772346	3.48975	1.53702	1.84353	1.94867	2.16173	1.97631	0.977726	1.32529	1.84394	1.26427	1.13669	0.928391	1.3856	4.27572	2.26673
FvH4_7g04580		Pentatricopeptide repeat (PPR) superfamily protein	5.04791	3.06701	5.03892	2.85262	2.80408	1.53156	1.6368	2.80806	3.21461	1.4437	2.85476	2.22776	2.94587	1.54491	0.763114	0.722396	0.837189	0.173785	1.82381	0.802312	1.44802	1.65747	1.18428	3.12537	1.83007	2.9829	1.52067	1.14673	0.94021	1.46224	0.0445335	2.47685	1.73554	2.2048	1.41985	2.51601	2.00902	1.63865	1.20276	1.78358	0.549219	0.413048	0.230732	0.287629	4.38296	1.91583
FvH4_7g05300		Trypsin family protein with PDZ domain	32.1411	20.1707	30.8545	16.2598	12.1236	6.59633	14.7499	12.2575	21.2526	7.50412	17.4557	13.6285	17.9146	7.80039	3.50647	3.39953	3.55263	2.25579	8.01117	4.07252	6.62211	7.66922	4.60237	16.6248	10.6028	16.8926	9.12569	5.4628	4.70955	4.90223	0.244008	11.949	7.37555	6.115	5.17741	9.77787	10.246	5.38362	5.40485	7.77864	3.9956	2.97826	2.71027	3.67024	18.6612	9.12497
FvH4_7g05440			2.11265	1.95695	2.02645	0.545526	0.459119	0.874743	0.408086	0.789033	0.371627	0.516903	0.251347	0.24702	0.610879	0.393342	0.332346	0.306985	0.355867	0.23881	0.361953	0.230231	0.34902	0.263712	0.286722	0.703279	0.325932	0.412142	0.245241	0.312119	0.363591	0.437318	0.285027	0.524263	0.740211	0.929831	0.59695	0.463422	0.303854	0.42204	0.575957	0.290905	0.437992	0.304148	0.347138	0.460498	0.478802	0.761958
FvH4_7g05660		Zn-dependent exopeptidases superfamily protein	34.1815	18.2064	32.1153	12.6119	13.09	7.29864	10.788	12.2947	15.3601	6.3023	11.7521	8.72466	12.4018	7.22839	5.72161	5.1769	5.76041	1.28118	5.82865	2.57344	7.04836	6.26188	7.47116	13.869	10.4592	9.89593	8.47919	6.40918	6.14715	6.82297	0.0181846	12.8821	7.51339	11.0997	8.39187	10.7869	14.749	10.7386	10.1824	9.74487	6.39323	5.22195	5.41575	5.80764	26.6152	18.4575
FvH4_7g05680		Class I glutamine amidotransferase-like superfamily protein	81.3911	71.983	76.2465	31.952	32.4002	23.305	33.3158	34.2908	40.0054	33.4369	37.7335	37.9319	27.6384	31.5964	40.0208	45.4773	44.547	26.9906	37.1856	20.0658	32.4995	48.4605	45.0139	29.8682	27.1109	23.5374	32.1216	43.2162	44.0934	37.5895	7.42714	28.5084	26.5178	33.3664	26.697	24.5575	33.8462	37.9664	46.7822	55.5783	25.1561	21.6838	31.3768	25.2564	30.9478	20.2646
FvH4_7g05690			19.0747	12.9767	13.3533	0	0	0	0	0	0	0	0	0	0	0	0	0	0	0	0	0	0	0	0	0	0	0	0	0	0	0	0	0	0	0	0	0	0	0	0	0	0	0	0	0	3.42474	2.58613
FvH4_7g05770			7.76573	4.75343	6.57309	1.33998	0.963161	2.04095	1.65023	1.68906	1.44833	1.59502	2.08863	2.26467	1.12953	0.713292	0.210012	0.294931	0.173292	0.273908	0.8509	0.330114	0.62142	0.737911	0.512093	1.61608	1.70683	0.463657	0.432225	0.219305	0.280379	0.178873	1.85563	1.70221	0.840794	1.6283	0.695183	1.30662	0.993922	1.01649	0.753792	0.824819	0.224241	0.10353	0.129008	0.301536	2.77554	2.22328
FvH4_7g05870		Sodium Bile acid symporter family	9.81284	5.05486	7.47202	3.27928	2.63042	2.02906	2.24463	3.07739	5.5704	2.0049	3.06359	2.98071	4.02259	1.84224	0.743791	0.539567	0.465208	0.316204	2.66341	0.962295	1.34864	1.24022	1.01259	5.53411	2.28576	2.3707	1.76973	1.26102	0.816981	1.05047	0	2.73027	0.807832	1.2445	0.634384	1.41508	1.98119	1.04701	1.46103	0.926185	0.991575	0.221228	0.827964	1.14623	4.44777	1.64128
FvH4_7g05970	PTL	Duplicated homeodomain-like superfamily protein	4.53349	5.68727	0.184663	0.0907415	0.0268186	0	0.308285	0.233865	0.565353	0.0323064	0.222594	0.285562	0	0.0919674	0.181938	0.180509	0.105836	0.705103	1.06526	0.205979	0.0308354	0	0	0.27967	0.02252	0.0462803	0.0779305	0.0184706	0.0170565	0.0321732	0	0.0523629	0.451621	0	0	0.0221487	0	0	0.0281563	0.0154742	0.0160966	0.00955289	0.0681005	0.0279633	3.12283	0.121348
FvH4_7g06032			32.8356	18.6826	22.37	11.8787	9.01695	9.71459	8.55488	6.94468	14.7628	7.95043	14.5132	11.2524	13.1656	6.13208	4.80034	3.4724	4.60993	1.49942	3.99733	4.04611	6.35906	8.51401	6.90739	14.204	14.6853	11.7053	8.67276	7.27798	5.58996	6.41889	0.890769	13.0081	6.40325	8.88055	9.09414	8.93254	8.58882	6.46887	6.03868	7.49579	4.31086	3.54009	4.49258	5.39434	20.3626	10.9914
FvH4_7g07230	ELO1	Paxneb protein-related	35.928	24.6949	34.9748	17.348	15.5144	13.4114	15.9358	15.5574	25.8189	16.6787	21.8738	17.5783	23.0845	17.6148	18.9336	16.661	18.0209	12.0162	25.9048	13.9048	18.4336	20.9246	22.3397	22.2252	16.827	18.331	21.9563	19.8856	17.3798	16.8658	0.161596	22.1781	7.51891	11.7317	15.7909	14.7788	19.5825	17.5297	16.3677	19.257	17.5039	15.3087	14.2693	21.4225	28.7871	14.9128
FvH4_7g07930	ADSS	adenylosuccinate synthase	2.32624	2.17392	1.95459	0.025608	0.0265952	0.077561	0.0708972	0	0	0.0402717	0.0138883	0.038919	0.092893	0.0409829	0	0.0532899	0.060933	0.0800166	0	0.0295027	0.139601	0.25055	0.153465	0.11253	0	0.0703146	0.0930206	0	0	0.0257402	0	0.0206075	0.0282818	0.0168039	0.0507451	0.0889991	0.0590296	0.0306644	0.0552933	0.0476066	0.0158052	0.0216339	0.0104833	0.0091524	0.33081	0.274984
FvH4_7g08250	KIS,TFCA	tubulin folding cofactor A (KIESEL)	80.1297	76.0149	83.9312	9.07777	7.83354	8.44112	14.3345	5.75364	17.4573	8.28447	16.4965	16.7496	14.5858	15.608	13.4081	12.9424	10.1037	22.483	16.0724	4.11899	7.1224	6.36244	6.0807	9.36771	14.1239	15.2743	15.5324	13.9069	12.2662	9.57405	0	14.5334	3.18115	4.09037	5.18583	10.9436	11.0942	8.35638	6.88824	6.22106	8.58112	10.2023	12.1399	10.2466	23.4784	11.4237
FvH4_7g08580			2.50289	2.08681	2.75865	1.2234	0.526371	0.776267	0.842356	0.92358	0.608235	0.729437	0.942592	0.935943	0.565966	0.59991	0.102947	0.217579	0.337181	0	0.0290343	0.0429462	0.667559	0.138887	0.0827367	0.128051	1.0478	0.359228	0.460079	0.231772	0.201786	0.352519	0	1.15957	0	0.888476	0.0776102	0.314706	0.152102	0.239314	0.170964	0.178147	0.262375	0.355249	0.528844	0.249072	0.042391	0.0262217
FvH4_7g10680	SPL11	squamosa promoter-like 11	48.7913	52.5955	32.8624	2.02155	1.07367	0.353041	2.19517	3.5878	1.70333	0.273218	9.03997	6.09547	20.3233	15.0392	11.0133	6.81598	3.57154	2.7871	2.65614	0.175126	0.175203	0.157686	0.184672	5.70981	0.0749965	23.4069	18.5504	14.2399	10.3594	5.74088	0	0.0591565	1.07762	0	0.0646308	0.322908	0.440195	0.410515	0.275995	0.665381	3.87611	2.4678	2.98975	3.03011	0	0
FvH4_7g11370	MAP1A	methionine aminopeptidase 1A	41.5767	36.693	40.5143	15.9839	17.9691	14.4304	25.0643	17.8647	30.0171	15.1222	30.6917	25.7574	18.7069	12.3977	9.74659	9.55816	11.9046	12.9432	13.656	4.8869	8.31603	7.73774	8.1743	21.0569	12.9822	15.6192	11.351	11.4814	11.1995	10.1322	0.728185	10.2038	19.367	12.9322	27.8112	15.6812	15.8233	15.5908	14.7683	18.1122	8.75016	6.77994	11.123	10.0226	42.6032	31.565
FvH4_7g12210		Transcriptional factor B3 family protein	89.3032	98.0725	99.961	4.9431	2.83992	1.82315	8.63729	7.84192	11.2733	4.20003	29.8861	13.7716	18.3108	12.4014	13.4692	13.4971	14.4112	3.32829	10.3684	2.55714	2.16392	3.34449	2.2215	5.05235	4.70248	16.1563	13.7421	15.1776	16.7428	15.1797	0.252077	4.38458	18.3021	5.42924	2.9857	5.33798	5.03758	4.6886	5.55442	6.02262	8.09707	7.0161	10.7947	10.7597	68.4814	8.60296
FvH4_7g12251			4.36961	3.32261	3.24307	0.736385	0.658746	1.5682	1.67377	0.953071	1.1247	0.649529	0.957926	1.13467	0.470613	0.145798	0.125855	0.0400721	0.046589	0.679618	0.953738	0.166754	0.548543	0.41722	0.267079	0.520134	0.682197	0.555345	0.482518	0.104245	0.107127	0.19972	1.55669	0.911508	0.305842	0.271363	0.244889	0.666433	0.717516	0.426661	0.227597	0.56678	0.0867624	0.0399623	0.0619449	0.0815834	1.63479	1.42546
FvH4_7g12260		transcriptional factor B3 family protein	72.766	94.6237	88.027	3.59273	1.69137	1.94838	8.47084	6.11638	8.86696	3.61361	37.9363	17.1015	15.1808	12.6655	15.6997	18.0004	20.1679	4.8072	17.0422	3.98389	1.19188	3.09776	2.27585	2.70094	3.15034	13.9553	10.5797	14.2209	13.7123	17.5238	0.0916854	1.73571	11.709	2.42157	2.59467	2.57511	2.91532	3.5287	4.2039	3.85595	9.54749	7.96951	13.0875	11.9712	47.0385	5.09117
FvH4_7g14570			13.4726	8.74429	10.5679	5.349	5.05679	4.09585	4.24814	6.67063	7.28853	2.46268	5.52186	3.7969	7.11588	2.90633	0.965989	2.22465	1.62326	0.825608	3.52082	1.00394	4.21147	4.52499	5.02513	7.18044	3.59953	4.54203	3.84021	2.72697	2.92589	3.17259	0.501885	5.23759	4.05151	1.7801	5.91196	2.75949	3.29255	3.52969	4.04112	2.57821	1.75849	1.78856	1.84672	2.76825	9.46732	7.89822
FvH4_7g17370			11.2727	7.23181	11.0918	3.65285	2.41611	1.37522	2.5351	5.40551	3.61298	1.63552	3.63663	2.21543	2.58507	1.15639	0.434317	0.269545	0.427778	0.525013	2.47758	1.02753	1.6172	1.6231	1.12741	6.83921	2.33878	2.3087	1.44816	0.602814	1.05839	0.808419	0	1.06353	3.34008	1.77381	1.77652	1.25618	1.31449	1.76974	2.15263	2.2951	0.315413	0.575439	0.740764	0.964738	13.4874	5.2438
FvH4_7g18610			7.84387	6.56612	7.59961	5.20767	4.93114	2.23742	3.24639	4.17285	5.23417	2.95438	4.58419	4.2067	3.72652	1.37679	0.619129	0.855513	1.4734	2.5845	2.45119	2.28876	3.29111	3.55295	3.55196	2.65837	3.28395	2.54719	0.947308	1.13684	0.695779	0.999116	0.170574	4.05023	1.91018	2.75805	2.25095	2.44465	2.86395	2.49549	1.82788	2.29023	4.2623	4.19963	2.9171	4.63125	5.68098	2.52415
FvH4_7g20440			2.82862	3.7667	4.06968	0	0.102099	0	0	0.098565	0.0936964	0	0.107695	0.0475226	0	0	0	0.13744	0	0	0	0	0.117391	0	0	0	0	0	0	0.0703179	0	0	0	0	0.122074	0	0	0	0	0	0	0	0	0	0	0	0.343768	0.176151
FvH4_7g21290		Protein of unknown function (DUF674)	1.11426	3.9035	8.54638	0	0	0	0.0347016	0	0	0	0.390216	0	0	0	0	0	0	1.66613	0.0603663	0.0446455	0	0	0	0	0	0	0	0	0	0	0	0.207289	0	0	0	0	0	0	0	0	0	0	0	0	0	0
FvH4_7g21300		Protein of unknown function (DUF674)	2.54857	34.7459	6.6621	0.0549258	0	0	0	0.251259	0	0	0.281687	0.0226677	0	0	0	0	0.0397497	1.31523	0.621014	0.532461	0	0	0	0.0532693	0	0.0459975	0.141514	1.38879	19.3286	19.2666	0	0	0.546732	0	0	0	0	0	0	0	0.423777	0.876583	1.37645	1.19594	0	0
FvH4_7g21570	RPL23AB	ribosomal protein L23AB	4.71536	4.01385	5.00658	1.63544	2.89893	0.952454	2.92356	1.7778	2.1587	1.11619	2.57819	1.93986	2.05391	1.53121	0.842734	0.607294	0.429713	0.74627	2.60821	0.794072	2.62659	1.35957	0.877611	1.63176	2.32122	2.33554	1.19785	0.203275	0.611622	0.653455	0	1.3751	0.39859	0.548335	0.676508	1.81018	1.56253	0.978012	1.06876	1.20775	0.537545	0.370809	0.336872	0.528795	5.04791	4.21084
FvH4_7g22150	ATMIN7,BEN1	HOPM interactor 7	5.72719	3.84477	7.05656	2.60784	2.03598	2.43197	1.4456	1.93915	2.22795	1.10147	1.95214	1.13914	2.7709	1.40543	1.04683	0.981757	0.866373	0.0433771	0.709725	0.546525	1.72992	1.3509	1.71976	2.46704	1.56697	2.73051	1.85433	1.86111	1.17226	1.28625	0.204259	2.30722	1.54489	1.91282	4.05303	1.4422	1.94378	1.03375	1.55904	1.70659	0.619705	0.526892	0.192812	0.617078	8.54403	4.8291
FvH4_7g22610		Calcium-dependent lipid-binding (CaLB domain) family protein	128.409	76.988	78.3167	18.5581	14.5228	18.9385	39.068	12.6234	45.7811	34.4485	69.6643	63.688	14.5144	16.1772	9.34067	14.4184	13.6801	14.5132	28.926	31.674	39.6792	41.5882	36.4153	30.6774	44.7041	10.8165	17.1723	16.7393	18.801	20.4126	0.199936	43.0513	53.1177	51.2496	95.5436	34.823	16.1827	12.0203	19.4088	43.2157	15.9479	18.0176	15.6401	20.5265	51.7779	52.4796
FvH4_7g22651	CYP71A23	cytochrome P450, family 71, subfamily A, polypeptide 23	3.22693	0.150079	0	0.305285	0.0676702	0.120386	0.0910947	0.153149	0.0621011	0.457258	0	0	0	0.11306	0.418937	0.227434	0.165701	0	0	0	0.070234	0.0885657	0.139017	0	0	0	0	0.224337	0.344304	0.0992194	0	0	0.153587	0	0.049315	0	0	0.0788004	0.196144	0.0442474	0.324926	0.120522	0.31877	0.235195	0	0.00917832
FvH4_7g24780		HXXXD-type acyl-transferase family protein	20.0211	16.4394	15.2112	0	0.0264754	0	0.624337	0	0.207232	0.179852	1.17833	0.387437	0.343287	2.0937	1.74786	0.652024	0.0392618	5.58432	2.51193	0.971667	0	0.0452009	0.881438	2.63358	0.779671	0.611922	1.32241	0.213288	0.216328	0.0500851	0.0485272	0.174272	4.10589	0.0419524	0.0634663	0.62652	0.0587637	0.0610525	0.124445	0.216786	0.0629362	0.00933774	0.0449045	0.0182223	25.9707	2.6897
FvH4_7g27690	ATSMC2	Structural maintenance of chromosomes (SMC) family protein	9.60965	6.9705	11.5192	2.21741	2.31177	1.80483	1.90513	1.48467	1.93795	1.7113	2.1705	1.83256	4.28399	3.04645	3.66003	3.28686	2.91698	0.711791	0.705073	0.46098	2.34382	2.46769	1.71815	2.44271	2.32722	4.76787	3.98093	4.19072	3.22282	3.69129	0.117891	4.45888	1.49005	1.19163	0.945266	1.95794	2.55748	1.57958	2.59756	2.59773	3.00255	3.05492	3.49339	3.6729	10.7117	4.04534
FvH4_7g28240			2.1793	1.62433	2.62869	0.859157	0.567549	0.385949	0.84882	0.84774	0.214936	0.713181	0.971682	0.393962	0.714945	0.710367	0.676938	0.590779	0.395964	0.0950735	0.406012	0.210325	0.828382	0.451529	0.724093	0.962887	1.68728	0.442171	0.324464	0.0978827	0.216462	0.433745	0.168763	1.7862	0	0.420229	0.633851	0.479436	1.13362	0.682045	0.494157	0.493436	0.587425	0.714833	0.465388	0.388494	1.09904	0.418608
FvH4_7g28690	AGL6	AGAMOUS-like 6	1.79422	5.40771	0.341967	0.0386475	0.13809	0	0.131333	0.122022	1.72907	0.423913	0.193458	0.529957	0.420857	0.143127	0.0303058	0	0	0.0520618	0.198435	0.0365401	0.0787981	0.0984749	0	0.77916	0	0.0267681	0	0.0536001	0	0	0	0	0.0819418	0.0274193	0	0.244688	0.153628	0.0399028	0.0273715	0.0197717	0.0102835	0	0	0	0.0605633	0.0360677
FvH4_7g32621			61.1138	66.8104	65.3561	17.9476	17.617	30.6386	42.5102	22.3362	31.3809	35.5154	39.6639	41.7119	30.0647	31.3479	33.3078	33.3195	34.8734	16.4576	23.0115	13.2819	24.7032	28.293	23.558	30.3585	32.7286	26.8516	21.9148	26.268	26.5011	29.6275	18.1755	24.3823	19.043	26.3878	24.6712	33.9486	28.7493	23.9169	26.6042	29.1239	29.1296	31.8979	34.7838	30.3666	7.31399	1.97139
FvH4_7g33460	ATBBC1,BBC1,RSU2	breast basic conserved 1	598.954	722.856	607.562	58.8887	79.4819	54.476	135.593	49.2035	109.163	60.007	139.568	117.594	87.8893	94.0255	71.3153	76.9252	71.1615	336.189	223.966	44.1635	74.1605	60.3886	34.6795	58.8481	81.9608	98.0213	72.1453	61.5361	69.3871	57.9733	0.250034	87.6032	46.5368	22.9471	25.2196	75.3132	61.8147	33.1343	26.0827	23.7367	75.7399	75.5234	96.5407	78.8332	226.103	271.033
FvH4_7g33500	ATBBC1,BBC1,RSU2	breast basic conserved 1	582.414	660.788	566.48	63.8591	77.3271	51.2305	135.224	51.731	114.556	64.8673	135.075	113.698	86.1369	93.7442	73.2756	82.2795	69.632	325.423	193.277	34.4432	70.1412	54.1666	30.9188	62.9846	86.388	96.2831	67.0918	58.2701	64.3301	51.0962	0.392013	94.2316	47.6493	24.6254	25.2328	75.6011	65.3317	36.6083	30.6088	24.3178	66.7941	66.4858	85.1964	67.9166	191.883	240.292
FvH4_7g33530		Pentatricopeptide repeat (PPR-like) superfamily protein	2.73964	2.40173	3.50726	1.103	1.01925	0.564514	1.33765	1.06364	1.62258	0.998319	1.78921	1.82147	0.892946	0.988886	0.766545	0.816912	0.99629	0.288004	0.765299	0.292158	0.933523	1.17963	0.787988	1.62574	1.03488	1.06999	0.853172	0.794577	1.10384	1.12851	0.0408844	1.47902	2.33763	0.462398	0.806164	0.854484	1.14341	0.716877	0.648726	1.00074	0.822628	0.765296	0.546184	0.808153	2.97984	1.86312
FvH4_7g33641	FU	Protein kinase family protein with ARM repeat domain	3.36364	1.99608	3.31401	0	0.028739	0	0	0	0.0263738	0	0	0	0	0	0	0	0	0	0	0	0	0	0	0.0285038	0	0.02245	0.0237472	0	0	0	0	0	0	0	0	0	0	0	0	0	0	0	0	0	0.684545	0.726831
FvH4_7g33830	ARFB1B,ATARFB1B	ADP-ribosylation factor B1B	146.031	142.217	135.019	71.6936	73.6166	83.6604	89.3906	80.4772	112.12	64.4585	98.7333	88.7852	77.4469	79.9085	93.955	101.259	86.0095	75.1549	63.6674	36.2298	76.7579	83.5611	83.8124	68.6985	96.0837	76.1646	90.7642	97.8341	99.0232	105.864	46.1369	84.5141	61.2703	80.3062	80.1319	51.4011	67.7805	73.344	75.9857	88.8361	108.201	90.1207	101.233	110.458	75.1358	65.2429
FvH4_c1g00130		NADH dehydrogenase subunit 7	44.5283	25.2519	9.34211	4.72824	7.60367	13.2503	0.193302	7.17873	2.39244	1.51483	0.0244326	0.18031	6.96794	0.928701	0.659696	0.516679	0.29663	1.10366	21.1381	4.68739	4.26404	0.994057	0.626541	4.15448	1.72003	7.62146	1.32225	0.872235	0.743731	0.747002	0.509061	2.29017	6.30046	0.788377	1.85307	2.08015	2.17366	1.672	2.26397	0.784841	0.0554284	0.0682462	0.0806042	0.0654451	4.42047	0.190874
FvH4_c2g00050			4.82642	2.47419	6.63516	0.328117	1.28564	2.53309	0.563995	1.4145	0.537553	0.281886	1.05894	0.464744	0.189112	0	0	0	0	0.301918	0.822807	0.467002	0.566088	0.463631	0.380542	0.551328	1.13797	0.184272	0	0.0934856	0	0.128103	2.3209	0.834804	0.370031	0.767924	0	0.457225	0.160662	0.248691	0.336325	0.209465	0.064091	0	0.091457	0	0.0741155	0.141938
FvH4_c6g00110		Cation efflux family protein	3.69029	1.94054	3.43884	1.1323	1.27247	1.76621	1.02619	1.47475	1.16778	0.910525	1.14735	0.773593	1.33109	0.421174	0.0876653	0.097786	0.0945619	0.121633	0.464371	0.364971	1.19163	1.06914	0.665045	2.44234	0.843688	1.29758	0.66692	0.29844	0.218071	0.369439	0.10522	1.24268	0.718097	1.45798	0.831903	0.856756	0.949312	0.88165	0.89914	0.971429	0.264862	0.102806	0.128819	0.170813	3.89905	2.18708
